# Supplementary material for: Electrophilic fluoroalkylthiolation induced diastereoselective and stereospecific 1,2-metalate migration of alkenylboronate complexes
Source: Royal Society of Chemistry journal article supplement (doi:10.1039/d0sc03039b), 2020-01-01

## Supporting Information

### Electrophilic Fluoroalkylthiolation Induced Diastereoselective and Stereospecific 1,2-Metalate Migration of Alkenylboronate Complexes

Feng Shen,<sup>†</sup> Long Lu<sup>‡,\*</sup> and Qilong Shen<sup>†,\*</sup>

<sup>†</sup>Key Laboratory of Organofluorine Chemistry, Shanghai Institute of Organic Chemistry, University of Chinese Academy of Sciences, Chinese Academy of Sciences  
345 Lingling Road, Shanghai 200032

<sup>‡</sup>Shanghai Institute of Organic Chemistry, University of Chinese Academy of Sciences, Chinese Academy of Sciences, 345 Lingling Road, Shanghai 200032

E-mail: shenql@sioc.ac.cn; lulong@sioc.ac.cn

#### Table of Contents

|                                                                                                                                                                                                                         |     |
|-------------------------------------------------------------------------------------------------------------------------------------------------------------------------------------------------------------------------|-----|
| 1. General information.....                                                                                                                                                                                             | S2  |
| 2. General procedure for reaction of lithium vinyl boronate with reagent <b>2a</b> .....                                                                                                                                | S3  |
| 3. General procedure for the lithiation-borylation of 2,4,6-Triisopropylbenzoate...                                                                                                                                     | S22 |
| 4. General procedure for synthesis of $\alpha$ -chiral ketones by stereospecific 1,2-migration.....                                                                                                                     | S25 |
| 5. General procedure for reaction of lithium vinyl boronate with <i>N</i> -Trifluoromethylthiosaccharin <b>7</b> .....                                                                                                  | S29 |
| 6. Preparation of difluoromethylthiolated derivative of PF-4191834 by conjunctive cross-coupling.....                                                                                                                   | S37 |
| 7. References.....                                                                                                                                                                                                      | S39 |
| 8. X-ray structure of <b>3s</b> .....                                                                                                                                                                                   | S40 |
| 9. <sup>1</sup> H, <sup>19</sup> F, <sup>13</sup> C, <sup>11</sup> B NMR and HPLC spectra of corresponding compound <b>3a-r</b> , <b>4a-f</b> , <b>5a-c</b> , <b>6a-c</b> , <b>8a-j</b> , <b>11</b> and <b>12</b> ..... | S57 |

**General information.**

All solvents were purified by standard method.  $^1\text{H}$ ,  $^{13}\text{C}$  and  $^{19}\text{F}$  NMR spectra were acquired on 300, 400, 500 MHz; 101, 126 MHz; 282, 376 MHz; 128 MHz spectrometer (300, 400, 500 MHz for  $^1\text{H}$ ; 101, 126 MHz for  $^{13}\text{C}$ ; 282, 376 MHz for  $^{19}\text{F}$ ; 128 MHz for  $^{11}\text{B}$ ).  $^1\text{H}$  NMR and  $^{13}\text{C}$  NMR chemical shifts were determined relative to internal standard TMS at  $\delta$  0.0 ppm and  $^{19}\text{F}$  NMR chemical shifts were determined relative to  $\text{CFCl}_3$  as inter standard. Chemical shifts ( $\delta$ ) are reported in ppm, and coupling constants ( $J$ ) are in hertz (Hz). The following abbreviations were used to explain the multiplicities: s = singlet, d = doublet, t = triplet, q = quartet, m = multiplet, br = broad. All reactions were monitored by TLC or  $^{19}\text{F}$  NMR. Flash column chromatograph was carried out using 300-400 mesh silica gel at medium pressure.

**Materials.** All reagents were received from commercial sources. Solvents were freshly dried and degassed according to the purification handbook *Purification of Laboratory Chemicals* before using.

## General Procedure for Reaction of Lithium aryl vinyl Boronate with Reagent 2a

### General Procedure 1a (GP1a)

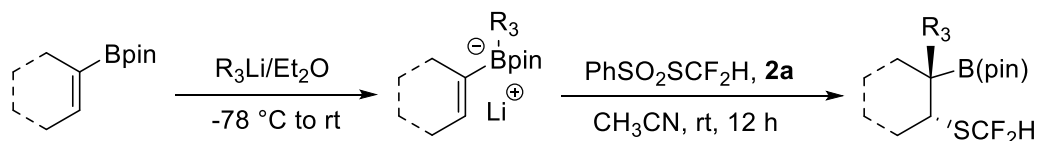

An oven-dried, 25 mL Schlenk flask equipped with a stir bar, septum, and digital thermocouple probe was charged with  $Et_2O$  (2.0 mL) and vinyl pinacol boronate (47 mg, 0.30 mmol). The mixture was cooled to  $0\text{ }^\circ\text{C}$ . A solution of phenyl lithium in THF (195  $\mu\text{L}$ , 2.0 M, 0.39 mmol, 1.3 equiv.) was added dropwise. The resulting solution was stirred at  $0\text{ }^\circ\text{C}$  for 15 min, then warmed to room temperature for additional 15 min. The solvent was carefully removed under reduced pressure, affording the lithium phenyl vinyl boronate complex as a white solid, which was used directly without further purification. To the solid was added  $CH_3CN$  (3.0 mL) and reagent **2a** (100 mg, 0.450 mmol, 1.50 equiv.). This mixture was stirred at room temperature for 12 h. The solvent was removed under reduced pressure, the residue was purified by silica gel chromatography (Eluent: ethyl acetate/petroleum ether = 1:50,  $R_f = 0.5$ ) to give compound **3a** as a yellow oil (68 mg, 72% yield).

### General Procedure 1b (GP1b)

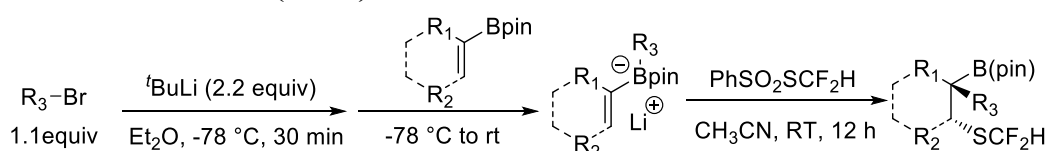

An oven-dried, 25-mL Schlenk flask equipped with a stir bar, septum, and digital thermocouple probe was charged with  $Et_2O$  (2.0 mL) and 4-bromoanisole (62 mg, 0.33 mmol, 1.1 equiv.). The resulting solution was cooled to  $-78\text{ }^\circ\text{C}$ . A solution of  $tBuLi$  in hexane (0.50 mL, 1.3 M, 0.66 mmol, 2.2 equiv.) was added dropwise. The mixture was stirred at  $-78\text{ }^\circ\text{C}$  for 30 min. A solution of 3,6-dihydro-2H-pyran-4-boronic acid pinacol ester (63 mg, 0.30 mmol, 1.0 equiv.) in  $Et_2O$  (2.0 mL) was added dropwise. The mixture was stirred at  $-78\text{ }^\circ\text{C}$  for 15 min, then warmed to room temperature for another 15 min. The solvent was carefully removed under reduced pressure, affording lithium aryl vinyl boronate complex as a white solid, which was used directly without further purification. To the solid was

added CH<sub>3</sub>CN (3.0 mL) and reagent **2a** (100 mg, 0.450 mmol, 1.50 equiv.). This mixture was stirred at room temperature for 12 h. The solvent was removed under reduced pressure, the residue was purified by silica gel chromatography (Eluent: ethyl acetate/petroleum ether = 1:20, R<sub>f</sub> = 0.4) to give compound **3c** as a yellow oil (61 mg, 51% yield).

**General Procedure 1c (GP1c)**

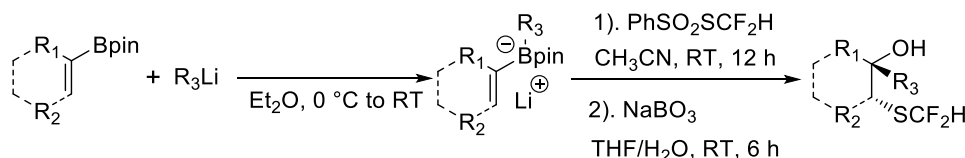

An oven-dried, 25 mL Schlenk flask equipped with a stir bar, septum, and digital thermocouple probe was charged with Et<sub>2</sub>O (2.0 mL) and vinyl pinacol boronate (47 mg, 0.30 mmol). The mixture was cooled to 0 °C. A solution of phenyl lithium in THF (195 μL, 2.0 M, 0.39 mmol, 1.3 equiv.) was added dropwise. The resulting solution was stirred at 0 °C for 15 min, then warmed to room temperature for additional 15 min. The solvent was carefully removed under reduced pressure, affording the lithium phenyl vinyl boronate complex as a white solid, which was used directly without further purification. To the solid was added CH<sub>3</sub>CN (3.0 mL) and reagent **2a** (100 mg, 0.450 mmol, 1.50 equiv.). This mixture was stirred at room temperature for 12 h.

The solvent was removed under reduced pressure, then NaBO<sub>3</sub> (0.90 mmol, 3.0 equiv.) and THF/H<sub>2</sub>O (v/v = 1:1, 6.0 mL) was added. The reaction was allowed to stir at room temperature for 6 h. Half of the solvent was removed under reduced pressure. The aqueous layer was extracted with ethyl acetate (10 mL × 3), and the combined organic layers were dried over magnesium sulfate, filtered, and concentrated. The residue was purified by silica gel chromatography (Eluent: ethyl acetate/petroleum ether = 1:5, R<sub>f</sub> = 0.5) to give compound **4a** as a yellow oil (43 mg, 71%).

**2-(2-(Difluoromethylthio)-1-phenylethyl)-4,4,5,5-tetramethyl-1,3,2-dioxaborolane**  
**3a**

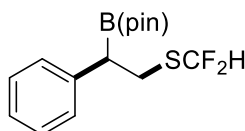

Prepared according to **GPIa** using pinacol vinyl boronate (47 mg, 0.30 mmol, 1.0 equiv.), phenyl lithium in THF (195  $\mu$ L, 2.0 M, 0.39 mmol, 1.3 equiv.) and reagent **2a** (100 mg, 0.450 mmol, 1.50 equiv.) to give compound **3a** as a yellow oil (68 mg, 72%). Eluent: ethyl acetate/petroleum ether (1:50,  $R_f$  = 0.5). **<sup>1</sup>H NMR** (400 MHz, CDCl<sub>3</sub>)  $\delta$  7.35 – 7.16 (m, 5 H), 6.74 (t,  $J$  = 56.6 Hz, 1 H), 3.31 – 3.19 (m, 1 H), 3.18 – 3.07 (m, 1 H), 2.67 (t,  $J$  = 8.1 Hz, 1 H), 1.24 (s, 6 H), 1.20 (s, 6 H); **<sup>19</sup>F NMR** (376 MHz, CDCl<sub>3</sub>)  $\delta$  -92.26 (dd,  $J$  = 233.4, 46.2 Hz), -93.03 (dd,  $J$  = 233.4, 46.5 Hz); **<sup>13</sup>C NMR** (151 MHz, CDCl<sub>3</sub>, signal of carbon adjacent to boron missing)  $\delta$  140.46, 128.63, 128.40, 120.98 (t,  $J$  = 272.2 Hz), 83.95, 30.41, 24.61, 24.56; **<sup>11</sup>B NMR** (128 MHz, CDCl<sub>3</sub>)  $\delta$  32.58 (s) ppm. **IR** (KBr):  $\nu_{\max}$  = 3058, 3022, 2977, 2930, 1599, 1494, 1469, 1446, 1380, 1372, 1327, 1273, 1210, 1166, 1140, 1069, 1031, 979, 960, 909, 858, 775, 759, 737, 699, 672  $\text{cm}^{-1}$ . **MS** (EI):  $m/z$  (%) 314, 279 (100). **HRMS**: Calcd for C<sub>15</sub>H<sub>21</sub>F<sub>2</sub>SO<sub>2</sub><sup>10</sup>B: 313.1360; Found: 313.1368.

**(±)-2-((3*R*,4*R*)-3-(difluoromethylthio)-4-phenyltetrahydro-2*H*-pyran-4-yl)-4,4,5,5-tetramethyl-1,3,2-dioxaborolane 3b**

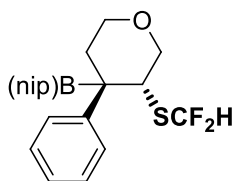

Prepared according to **GPIa** using 3,6-dihydro-2*H*-pyran-4-boronic acid pinacol ester (63 mg, 0.30 mmol, 1.0 equiv.), phenyl lithium in THF (195  $\mu$ L, 2.0 M, 0.39 mmol, 1.3 equiv.) and reagent **2a** (100 mg, 0.450 mmol, 1.50 equiv.) to give compound **3b** as a yellow oil (80 mg, 72%). Eluent: ethyl acetate/petroleum ether (1:20,  $R_f$  = 0.5). **<sup>1</sup>H NMR** (400 MHz, CDCl<sub>3</sub>)  $\delta$  7.89 – 7.81 (m, 2 H), 7.45 – 7.30 (m, 3 H), 6.52 (t,  $J$  = 56.3 Hz, 1 H), 4.51 (dd,  $J$  = 11.4, 1.7 Hz, 1 H), 4.03 (td,  $J$  = 11.3, 2.3 Hz, 1 H), 3.77 – 3.65 (m, 2 H), 3.36 (d,  $J$  = 1.7 Hz, 1 H), 2.53 (ddd,  $J$  = 14.3, 11.5, 4.8 Hz, 1 H), 1.70

(dd,  $J = 14.1, 1.7$  Hz, 1 H), 1.49 (s, 3 H), 1.33 (s, 3 H), 1.29 (s, 3 H), 1.19 (s, 3 H);  $^{19}\text{F}$  NMR (376 MHz,  $\text{CDCl}_3$ )  $\delta$  -92.03 (dd,  $J = 239.9, 55.8$  Hz), -93.33 (dd,  $J = 239.8, 56.8$  Hz);  $^{13}\text{C}$  NMR (101 MHz,  $\text{CDCl}_3$ , signal of  $sp^3$  carbon and  $sp^2$  carbon adjacent to boron were missing)  $\delta$  134.08, 130.00, 127.34, 120.06 (dd,  $J = 275.0, 272.7$  Hz), 79.97, 77.18, 68.82, 62.51, 43.53, 32.37, 26.34, 25.09, 25.05, 23.17;  $^{11}\text{B}$  NMR (128 MHz,  $\text{CDCl}_3$ )  $\delta$  34.26 (s) ppm. IR (KBr):  $\nu_{\text{max}} = 2977, 2867, 1465, 1434, 1390, 1375, 1337, 1302, 1213, 1158, 1143, 1108, 1057, 1030, 980, 949, 890, 862, 852, 775, 758, 731, 698$   $\text{cm}^{-1}$ . MS (ESI): 393 ( $\text{M}+\text{Na}^+$ ). HRMS (ESI) for  $\text{C}_{18}\text{H}_{29}^{10}\text{BF}_2\text{O}_3\text{NS}$  ( $\text{M}+\text{NH}_4^+$ ): Calcd: 387.1960; Found: 387.1956.

**(±)-2-((3*R*,4*R*)-3-(difluoromethylthio)-4-(4-methoxyphenyl)tetrahydro-2*H*-pyran-4-yl)-4,4,5,5-tetramethyl-1,3,2-dioxaborolane 3c**

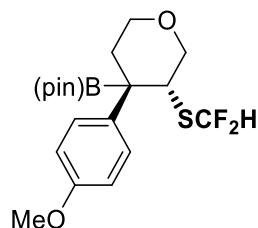

Prepared according to **GPIb** using 4-bromoanisole (62 mg, 0.33 mmol, 1.1 equiv.),  $t\text{BuLi}$  in hexane (0.50 mL, 1.3 M, 0.66 mmol, 2.2 equiv.), 3,6-dihydro-2*H*-pyran-4-boronic acid pinacol ester (63 mg, 0.30 mmol, 1.0 equiv.) and reagent **2a** (100 mg, 0.450 mmol, 1.50 equiv.) to give compound **3c** as a yellow oil (61 mg, 51%). Eluent: ethyl acetate/petroleum ether (1:20,  $R_f = 0.4$ ).  $^1\text{H}$  NMR (400 MHz,  $\text{CDCl}_3$ )  $\delta$  7.95 (d,  $J = 8.7$  Hz, 2 H), 6.89 (d,  $J = 8.8$  Hz, 2 H), 6.49 (t,  $J = 56.3$  Hz, 1 H), 4.56 (d,  $J = 11.2$  Hz, 1 H), 4.05 (td,  $J = 11.7, 2.0$  Hz, 1 H), 3.83 (s, 3 H), 3.77 (dd,  $J = 11.4, 1.8$  Hz, 1 H), 3.71 (dd,  $J = 11.0, 3.3$  Hz, 1 H), 3.35 (d,  $J = 1.8$  Hz, 1 H), 2.55 (ddd,  $J = 14.2, 12.0, 4.9$  Hz, 1 H), 1.65 (dd,  $J = 14.2, 1.7$  Hz, 1 H), 1.47 (s, 3 H), 1.33 (s, 3 H), 1.27 (s, 3 H), 1.15 (s, 3 H);  $^{19}\text{F}$  NMR (376 MHz,  $\text{CDCl}_3$ )  $\delta$  -92.40 (dd,  $J = 240.7, 55.9$  Hz), -93.45 (dd,  $J = 240.8, 57.2$  Hz);  $^{13}\text{C}$  NMR (101 MHz,  $\text{CDCl}_3$ , signal of  $sp^3$  carbon and  $sp^2$  carbon adjacent to boron was missing)  $\delta$  161.49, 137.09, 120.08 (dd,  $J = 275.3, 272.5$  Hz), 112.84, 79.77, 77.22, 68.77, 62.53, 55.02, 43.62, 32.38, 26.44, 25.07, 25.03, 23.03;  $^{11}\text{B}$  NMR (128 MHz,  $\text{CDCl}_3$ )  $\delta$  43.25 (s) ppm. IR (KBr):  $\nu_{\text{max}} = 2978, 1722, 1604, 1511, 1455, 1410, 1390, 1361, 1275, 1248,$

1179, 1143, 1091, 1066, 1031, 982, 963, 850, 829, 776, 734, 672  $\text{cm}^{-1}$ . **MS** (ESI): 423 ( $\text{M}+\text{Na}^+$ ). **HRMS** (ESI) for  $\text{C}_{19}\text{H}_{31}^{10}\text{BF}_2\text{O}_4\text{NS}$  ( $\text{M}+\text{NH}_4^+$ ): Calcd: 417.2066; Found: 417.2062.

(±)-2-((3*R*,4*R*)-3-(difluoromethylthio)-4-(4-fluorophenyl)tetrahydro-2*H*-pyran-4-yl)-4,4,5,5-tetramethyl-1,3,2-dioxaborolane **3d**

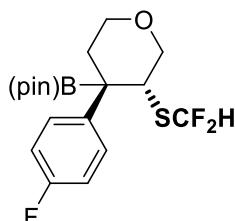

Prepared according to **GP1b** using 4-bromofluorobenzene (58 mg, 0.33 mmol, 1.1 equiv.),  $t\text{BuLi}$  in hexane (0.50 mL, 1.3 M, 0.66 mmol, 2.2 equiv.), 3,6-dihydro-2*H*-pyran-4-boronic acid pinacol ester (63 mg, 0.30 mmol, 1.0 equiv.) and reagent **2a** (100 mg, 0.450 mmol, 1.50 equiv.) to give compound **3d** as a yellow oil (90 mg, 74%). Eluent: ethyl acetate/petroleum ether (1:20,  $R_f = 0.5$ ).  $^1\text{H NMR}$  (400 MHz,  $\text{CDCl}_3$ )  $\delta$  7.92 (dd,  $J = 8.4, 6.3$  Hz, 2 H), 7.03 (t,  $J = 8.7$  Hz, 2 H), 6.51 (t,  $J = 56.1$  Hz, 1 H), 4.54 (d,  $J = 11.4$  Hz, 1 H), 4.05 (td,  $J = 11.5, 2.1$  Hz, 1 H), 3.78 – 3.67 (m, 2 H), 3.36 (d,  $J = 1.8$  Hz, 1 H), 2.49 (ddd,  $J = 14.2, 11.9, 4.9$  Hz, 1 H), 1.67 (dd,  $J = 14.0, 1.7$  Hz, 1 H), 1.48 (s, 3 H), 1.33 (s, 3 H), 1.29 (s, 3 H), 1.16 (s, 3 H);  $^{19}\text{F NMR}$  (376 MHz,  $\text{CDCl}_3$ )  $\delta$  -91.95 (dd,  $J = 239.6, 55.8$  Hz, 1 F), -93.37 (dd,  $J = 239.6, 56.5$  Hz, 1 F), -109.62 – -110.24 (m, 1 F);  $^{13}\text{C NMR}$  (101 MHz,  $\text{CDCl}_3$ , signal of  $sp^3$  carbon and  $sp^2$  carbon adjacent to boron was missing)  $\delta$  164.33 (d,  $J = 250.5$  Hz), 136.97 (d,  $J = 7.9$  Hz), 119.95 (t,  $J = 273.9$  Hz), 114.37 (d,  $J = 19.8$  Hz), 80.14, 77.34, 68.82, 62.42, 43.33, 32.21, 26.37, 25.06, 25.01, 23.07;  $^{11}\text{B NMR}$  (128 MHz,  $\text{CDCl}_3$ )  $\delta$  43.98 (s) ppm. **IR** (KBr):  $\nu_{\text{max}} = 2978, 2869, 1595, 1508, 1465, 1369, 1394, 1334, 1273, 1231, 1161, 1142, 1100, 1056, 1016, 912, 865, 832, 745$   $\text{cm}^{-1}$ . **MS** (ESI): 411 ( $\text{M}+\text{Na}^+$ ). **HRMS** (ESI) for  $\text{C}_{18}\text{H}_{28}^{10}\text{BF}_3\text{O}_3\text{NS}$  ( $\text{M}+\text{NH}_4^+$ ): Calcd: 405.1866; Found: 405.1862.

(±)-2-((3*R*,4*R*)-4-(4-chlorophenyl)-3-(difluoromethylthio)tetrahydro-2*H*-pyran-4-yl)-4,4,5,5-tetramethyl-1,3,2-dioxaborolane **3e**

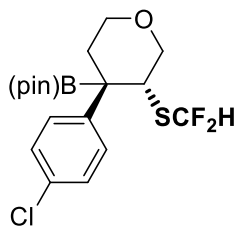

Prepared according to **GPIb** using 4-bromochlorobenzene (63 mg, 0.33 mmol, 1.1 equiv.), <sup>t</sup>BuLi in hexane (0.50 mL, 1.3 M, 0.66 mmol, 2.2 equiv.), 3,6-dihydro-2*H*-pyran-4-boronic acid pinacol ester (63 mg, 0.30 mmol, 1.0 equiv.) and reagent **2a** (100 mg, 0.450 mmol, 1.50 equiv.) to give compound **3e** as a yellow oil (85 mg, 68%). Eluent: ethyl acetate/petroleum ether (1:20, *R<sub>f</sub>* = 0.5). <sup>1</sup>H NMR (400 MHz, CDCl<sub>3</sub>) δ 7.82 (d, *J* = 8.3 Hz, 2 H), 7.32 (d, *J* = 8.3 Hz, 2 H), 6.52 (t, *J* = 56.0 Hz, 1 H), 4.53 (dd, *J* = 11.4, 1.7 Hz, 1 H), 4.04 (td, *J* = 11.4, 2.1 Hz, 1 H), 3.71 (ddd, *J* = 7.9, 6.7, 2.0 Hz, 2 H), 3.36 (d, *J* = 1.9 Hz, 1 H), 2.47 (ddd, *J* = 14.1, 11.8, 4.9 Hz, 1 H), 1.67 (dd, *J* = 14.1, 1.8 Hz, 1 H), 1.48 (s, 3 H), 1.32 (s, 3 H), 1.29 (s, 3 H), 1.17 (s, 3 H); <sup>19</sup>F NMR (376 MHz, CDCl<sub>3</sub>) δ -91.74 (dd, *J* = 239.0, 55.8 Hz), -93.36 (dd, *J* = 239.0, 56.1 Hz); <sup>13</sup>C NMR (101 MHz, CDCl<sub>3</sub>, signal of *sp*<sup>3</sup> carbon and *sp*<sup>2</sup> carbon adjacent to boron was missing) δ 136.43, 135.82, 127.58, 119.89 (dd, *J* = 274.5, 273.3 Hz), 80.24, 77.32, 68.81, 62.37, 43.18, 32.10, 26.32, 25.04, 24.99, 23.06; <sup>11</sup>B NMR (128 MHz, CDCl<sub>3</sub>) δ 44.21 (s) ppm. IR (KBr): ν<sub>max</sub> = 2978, 2868, 1586, 1489, 1463, 1391, 1360, 1334, 1302, 1235, 1143, 1092, 1055, 1015, 913, 890, 774, 744 cm<sup>-1</sup>. MS (ESI): 427 (M+Na<sup>+</sup>). HRMS (ESI) for C<sub>18</sub>H<sub>28</sub><sup>10</sup>BF<sub>2</sub>O<sub>3</sub>NSCl (M+NH<sub>4</sub><sup>+</sup>): Calcd: 421.1570; Found: 421.1567.

(±)-2-((3*R*,4*R*)-4-(4-bromophenyl)-3-(difluoromethylthio)tetrahydro-2*H*-pyran-4-yl)-4,4,5,5-tetramethyl-1,3,2-dioxaborolane **3f**

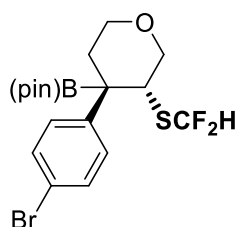

Prepared according to **GPIb** using 4-bromo-1,2,3,6-tetrahydropyran (54 mg, 0.33 mmol, 1.1 equiv.), <sup>t</sup>BuLi in hexane (0.50 mL, 1.3 M, 0.66 mmol, 2.2 equiv.), 4-bromophenylboronic acid pinacol ester (85 mg, 0.30 mmol, 1.0 equiv.) and reagent



**2a** (100 mg, 0.450 mmol, 1.50 equiv.) to give compound **3f** as a yellow oil (75 mg, 56%). Eluent: ethyl acetate/petroleum ether (1:20,  $R_f = 0.5$ ).  $^1\text{H NMR}$  (400 MHz,  $\text{CDCl}_3$ )  $\delta$  7.74 (d,  $J = 8.1$  Hz, 2 H), 7.48 (d,  $J = 8.1$  Hz, 2 H), 6.52 (t,  $J = 56.0$  Hz, 1 H), 4.53 (d,  $J = 11.3$  Hz, 1 H), 4.03 (t,  $J = 10.5$  Hz, 1 H), 3.71 (t,  $J = 9.6$  Hz, 2 H), 3.36 (s, 1 H), 2.46 (td,  $J = 14.2, 4.7$  Hz, 1 H), 1.67 (d,  $J = 14.1$  Hz, 1 H), 1.48 (s, 3 H), 1.32 (s, 3 H), 1.28 (s, 3 H), 1.16 (s, 3 H);  $^{19}\text{F NMR}$  (376 MHz,  $\text{CDCl}_3$ )  $\delta$  -91.69 (dd,  $J = 239.0, 55.8$  Hz), -93.34 (dd,  $J = 239.1, 56.1$  Hz);  $^{13}\text{C NMR}$  (101 MHz,  $\text{CDCl}_3$ , signal of  $sp^3$  carbon and  $sp^2$  carbon adjacent to boron was missing)  $\delta$  135.94, 130.52, 125.09, 119.85 (t,  $J = 273.5$  Hz), 80.26, 77.32, 68.81, 62.35, 43.09, 32.05, 26.31, 25.02, 24.99, 23.05;  $^{11}\text{B NMR}$  (128 MHz,  $\text{CDCl}_3$ )  $\delta$  45.69 (s) ppm. **IR** (KBr):  $\nu_{\text{max}} = 2978, 2868, 1722, 1588, 1490, 1389, 1359, 1331, 1269, 1214, 1142, 1088, 1058, 1011, 950, 889, 857, 822, 776, 723, 650$   $\text{cm}^{-1}$ . **HRMS** (ESI) for  $\text{C}_{18}\text{H}_{28}^{10}\text{BBrF}_2\text{O}_3\text{NS}$  ( $\text{M}+\text{NH}_4^+$ ): Calcd: 465.1065; Found: 465.1067.

**(±)-2-((3*R*,4*R*)-3-(difluoromethylthio)-4-(4-(trifluoromethyl)phenyl)tetrahydro-2*H*-pyran-4-yl)-4,4,5,5-tetramethyl-1,3,2-dioxaborolane 3g**

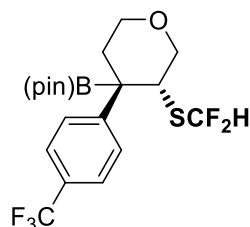

Prepared according to **GPIb** using 4-bromobenzotrifluoride (68 mg, 0.33 mmol, 1.1 equiv.),  $t\text{BuLi}$  in hexane (0.50 mL, 1.3 M, 0.66 mmol, 2.2 equiv.), 3,6-dihydro-2*H*-pyran-4-boronic acid pinacol ester (63 mg, 0.30 mmol, 1.0 equiv.) and reagent **2a** (100 mg, 0.450 mmol, 1.50 equiv.) to give compound **3g** as a yellow oil (85 mg, 62%). Eluent: ethyl acetate/petroleum ether (1:20,  $R_f = 0.5$ ).  $^1\text{H NMR}$  (400 MHz,  $\text{CDCl}_3$ )  $\delta$  7.92 (d,  $J = 7.9$  Hz, 2 H), 7.59 (d,  $J = 8.0$  Hz, 2 H), 6.54 (t,  $J = 55.7$  Hz, 1 H), 4.52 (d,  $J = 10.0$  Hz, 1 H), 4.04 (td,  $J = 11.4, 1.9$  Hz, 1 H), 3.77 – 3.67 (m, 2 H), 3.39 (d,  $J = 1.5$  Hz, 1 H), 2.46 (ddd,  $J = 14.1, 11.7, 4.8$  Hz, 1 H), 1.72 (d,  $J = 12.7$  Hz, 1 H), 1.50 (s, 3 H), 1.33 (s, 3 H), 1.30 (s, 3 H), 1.20 (s, 3 H);  $^{19}\text{F NMR}$  (376 MHz,  $\text{cdcl}_3$ )  $\delta$  -62.95 (s, 3 F), -91.56 (dd,  $J = 238.4, 55.8$  Hz, 1 F), -93.33 (dd,  $J = 238.4, 55.7$  Hz, 1 F);  $^{13}\text{C NMR}$  (101 MHz,  $\text{CDCl}_3$ , signal of  $sp^3$  carbon and  $sp^2$

carbon adjacent to boron was missing)  $\delta$  133.96, 131.42 (dd,  $J = 64.4, 32.3$  Hz), 123.99 (q,  $J = 3.7$  Hz), 119.86 (t,  $J = 273.9$  Hz), 80.52, 77.38, 68.84, 62.32, 43.05, 32.01, 26.27, 25.07, 24.99, 23.13;  $^{11}\text{B}$  NMR (128 MHz,  $\text{CDCl}_3$ )  $\delta$  44.71 (s) ppm. IR (KBr):  $\nu_{\text{max}} = 2979, 2930, 2850, 1617, 1372, 1326, 1272, 1239, 1213, 1166, 1125, 1071, 1018, 851, 831, 782$   $\text{cm}^{-1}$ . MS (ESI): 456 ( $\text{M}+\text{NH}_4^+$ ). HRMS (ESI) for  $\text{C}_{19}\text{H}_{28}^{10}\text{BF}_5\text{O}_3\text{NS}$  ( $\text{M}+\text{NH}_4^+$ ): Calcd: 455.1834; Found: 455.1828.

(±)-2-((3*R*,4*R*)-3-(difluoromethylthio)-4-(naphthalen-2-yl)tetrahydro-2*H*-pyran-4-yl)-4,4,5,5-tetramethyl-1,3,2-dioxaborolane **3h**

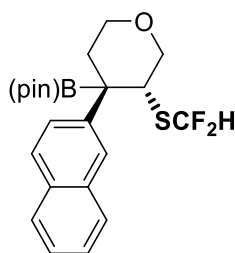

Prepared according to **GPIb** using 2-bromonaphthalene (68 mg, 0.33 mmol, 1.1 equiv.),  $t\text{BuLi}$  in hexane (0.50 mL, 1.3 M, 0.66 mmol, 2.2 equiv.), 3,6-dihydro-2*H*-pyran-4-boronic acid pinacol ester (63 mg, 0.30 mmol, 1.0 equiv.) and reagent **2a** (100 mg, 0.450 mmol, 1.50 equiv.) to give compound **3h** as a yellow oil (79 mg, 63%). Eluent: ethyl acetate/petroleum ether (1:20,  $R_f = 0.5$ ).  $^1\text{H}$  NMR (400 MHz,  $\text{CDCl}_3$ )  $\delta$  8.37 (s, 1 H), 7.94 (d,  $J = 8.3$  Hz, 1 H), 7.91 – 7.85 (m, 1 H), 7.85 – 7.77 (m, 2 H), 7.48 (pd,  $J = 6.9, 3.5$  Hz, 2 H), 6.49 (t,  $J = 56.2$  Hz, 1 H), 4.54 (dd,  $J = 11.4, 1.9$  Hz, 1 H), 4.07 (td,  $J = 11.3, 2.2$  Hz, 1 H), 3.80 – 3.69 (m, 2 H), 3.44 (t,  $J = 11.1$  Hz, 1 H), 2.67 (ddd,  $J = 14.1, 11.5, 4.7$  Hz, 1 H), 1.78 (dd,  $J = 14.1, 1.8$  Hz, 1 H), 1.53 (s, 3 H), 1.36 (s, 3 H), 1.31 (s, 3 H), 1.22 (s, 3 H);  $^{19}\text{F}$  NMR (376 MHz,  $\text{CDCl}_3$ )  $\delta$  -91.81 (dd,  $J = 239.1, 55.8$  Hz), -93.36 (dd,  $J = 239.0, 56.4$  Hz);  $^{13}\text{C}$  NMR (101 MHz,  $\text{CDCl}_3$ , signal of  $sp^3$  carbon and  $sp^2$  carbon adjacent to boron was missing)  $\delta$  135.39, 134.22, 132.60, 130.46, 128.86, 127.49, 126.82, 126.48, 125.68, 120.01 (dd,  $J = 275.0, 272.9$  Hz), 80.16, 77.28, 68.88, 62.53, 43.50, 32.47, 26.41, 25.13, 25.08, 23.17;  $^{11}\text{B}$  NMR (128 MHz,  $\text{CDCl}_3$ )  $\delta$  44.72 (s) ppm. IR (KBr):  $\nu_{\text{max}} = 3055, 2977, 2867, 1466, 1369, 1351, 1319, 1301, 1277, 1236, 1193, 1142, 1132, 1104, 1056, 1017, 982, 962, 893, 877, 747$   $\text{cm}^{-1}$ . MS (ESI): 443 ( $\text{M}+\text{Na}^+$ ). HRMS (ESI) for

C<sub>22</sub>H<sub>31</sub><sup>10</sup>BF<sub>2</sub>O<sub>3</sub>NS (M+NH<sub>4</sub><sup>+</sup>): Calcd: 437.2117; Found: 437.2113.

(±)-2-((3*R*,4*R*)-4-(3,5-di-*tert*-butylphenyl)-3-(difluoromethylthio)tetrahydro-2*H*-pyran-4-yl)-4,4,5,5-tetramethyl-1,3,2-dioxaborolane **3i**

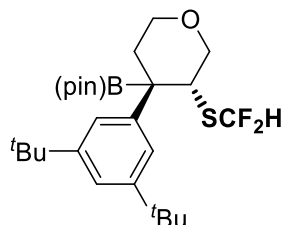

Prepared according to **GPIb** using 3,5-di-*tert*-butylbromobenzene (89 mg, 0.33 mmol, 1.1 equiv.), <sup>t</sup>BuLi in hexane (0.50 mL, 1.3 M, 0.66 mmol, 2.2 equiv.), 3,6-dihydro-2*H*-pyran-4-boronic acid pinacol ester (63 mg, 0.30 mmol, 1.0 equiv.) and reagent **2a** (100 mg, 0.450 mmol, 1.50 equiv.) to give compound **3i** as a yellow oil (69 mg, 48%). Eluent: ethyl acetate/petroleum ether (1:20, *R<sub>f</sub>* = 0.5). <sup>1</sup>H NMR (400 MHz, CDCl<sub>3</sub>) δ 7.67 (s, 2 H), 7.46 (d, *J* = 1.7 Hz, 1 H), 6.49 (t, *J* = 57.0 Hz, 1 H), 4.47 (d, *J* = 11.4 Hz, 1 H), 4.01 (t, *J* = 10.6 Hz, 1 H), 3.66 (dd, *J* = 16.4, 11.9 Hz, 2 H), 3.31 (s, 1 H), 2.57 – 2.45 (m, 1 H), 1.71 (d, *J* = 14.1 Hz, 1 H), 1.49 (s, 3 H), 1.34 – 1.28 (m, 24 H), 1.21 (s, 3 H); <sup>19</sup>F NMR (376 MHz, CDCl<sub>3</sub>) δ -92.60 (dd, *J* = 218.7, 33.1 Hz), -93.34 (dd, *J* = 218.6, 34.0 Hz); <sup>13</sup>C NMR (101 MHz, CDCl<sub>3</sub>, signal of *sp*<sup>3</sup> carbon and *sp*<sup>2</sup> carbon adjacent to boron was missing) δ 149.30, 128.12, 124.08, 120.43 (t, *J* = 273.7 Hz), 79.82, 77.14, 69.02, 62.87, 44.47, 34.93, 33.05, 31.58, 26.39, 25.28, 25.24, 23.55; <sup>11</sup>B NMR (128 MHz, CDCl<sub>3</sub>) δ 45.10 (s) ppm. IR (KBr): *v*<sub>max</sub> = 2964, 2868, 1595, 1467, 1426, 1391, 1369, 1306, 1266, 1248, 1216, 1144, 1057, 1027, 963, 852, 715 cm<sup>-1</sup>. MS (ESI): 505 (M+Na<sup>+</sup>). HRMS (ESI) for C<sub>26</sub>H<sub>45</sub><sup>10</sup>BF<sub>2</sub>O<sub>3</sub>NS (M+NH<sub>4</sub><sup>+</sup>): Calcd: 499.3212; Found: 499.3211.

(±)-2-((3*R*,4*S*)-4-butyl-3-(difluoromethylthio)tetrahydro-2*H*-pyran-4-yl)-4,4,5,5-tetramethyl-1,3,2-dioxaborolane **3j**

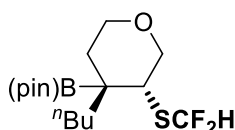

Prepared according to **GPIa** using 3,6-dihydro-2*H*-pyran-4-boronic acid pinacol ester (63 mg, 0.30 mmol, 1.0 equiv.), *n*-butyl lithium in hexane (165 μL, 2.0 M, 0.330

mmol, 1.10 equiv.) and reagent **2a** (100 mg, 0.450 mmol, 1.50 equiv.) to give compound **3j** as a yellow oil (50 mg, 46%). Eluent: ethyl acetate/petroleum ether (1:20,  $R_f = 0.5$ ). **<sup>1</sup>H NMR** (400 MHz, CDCl<sub>3</sub>) δ 6.79 (t,  $J = 56.1$  Hz, 1 H), 4.42 (d,  $J = 11.4$  Hz, 1 H), 3.94 (t,  $J = 11.1$  Hz, 1 H), 3.68 (d,  $J = 8.4$  Hz, 2 H), 3.23 (s, 1 H), 2.12 – 2.00 (m, 1 H), 1.45 (d,  $J = 14.3$  Hz, 1 H), 1.40 – 0.94 (m, 18 H), 0.89 (t,  $J = 6.8$  Hz, 3 H); **<sup>19</sup>F NMR** (376 MHz, CDCl<sub>3</sub>) δ -92.07 (d,  $J = 55.9$  Hz), -92.45 (d,  $J = 56.2$  Hz); **<sup>13</sup>C NMR** (101 MHz, CDCl<sub>3</sub>, signal of  $sp^3$  carbon adjacent to boron was missing) δ 120.32 (t,  $J = 273.2$  Hz), 78.47, 76.95, 68.84, 62.64, 43.45, 31.59, 26.15, 26.09, 25.55, 25.26, 25.13, 23.50, 14.06; **<sup>11</sup>B NMR** (128 MHz, CDCl<sub>3</sub>) δ 49.53 (s) ppm. **IR** (KBr):  $\nu_{\max} = 2955, 2868, 1465, 1390, 1367, 1322, 1300, 1237, 1151, 1101, 1059, 1024, 913, 774, 745$  cm<sup>-1</sup>. **MS** (ESI): 373 (M+Na<sup>+</sup>). **HRMS** (ESI) for C<sub>16</sub>H<sub>33</sub><sup>10</sup>BF<sub>2</sub>O<sub>3</sub>NS (M+NH<sub>4</sub><sup>+</sup>): Calcd: 367.2273; Found: 367.2269.

**(±)-5-((3*R*,4*R*)-3-(difluoromethylthio)-4-(4,4,5,5-tetramethyl-1,3,2-dioxaborolan-2-yl)tetrahydro-2*H*-pyran-4-yl)-1-methyl-1*H*-indole **3k****

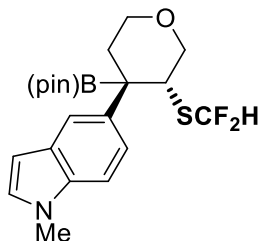

Prepared according to **GPIb** using 5-bromo-1-methyl-1*H*-indole (70 mg, 0.33 mmol, 1.1 equiv.), <sup>t</sup>BuLi in hexane (0.50 mL, 1.3 M, 0.66 mmol, 2.2 equiv.), 3,6-dihydro-2*H*-pyran-4-boronic acid pinacol ester (63 mg, 0.30 mmol, 1.0 equiv.) and reagent **2a** (100 mg, 0.450 mmol, 1.50 equiv.) to give compound **3k** as a brown oil (63 mg, 48%). Eluent: ethyl acetate/petroleum ether (1:10,  $R_f = 0.3$ ). **<sup>1</sup>H NMR** (400 MHz, CDCl<sub>3</sub>) δ 8.31 (s, 1 H), 7.86 (d,  $J = 8.5$  Hz, 1 H), 7.30 (d,  $J = 8.5$  Hz, 1 H), 7.03 (d,  $J = 3.1$  Hz, 1 H), 6.56 – 6.51 (m, 1 H), 6.47 (t,  $J = 56.1$  Hz, 1 H), 4.56 (d,  $J = 11.3$  Hz, 1 H), 4.06 (dd,  $J = 16.1, 6.6$  Hz, 1 H), 3.83 – 3.67 (m, 5 H), 3.39 (s, 1 H), 2.72 (ddd,  $J = 14.4, 11.9, 4.8$  Hz, 1 H), 1.71 (d,  $J = 14.2$  Hz, 1 H), 1.50 (s, 3 H), 1.36 (s, 3 H), 1.28 (s, 3 H), 1.18 (s, 3 H); **<sup>19</sup>F NMR** (376 MHz, CDCl<sub>3</sub>) δ -92.60 (dd,  $J = 241.2, 56.0$  Hz), -93.50 (dd,  $J = 241.2, 57.4$  Hz); **<sup>13</sup>C NMR** (101 MHz, CDCl<sub>3</sub>, signal of  $sp^3$  carbon and  $sp^2$  carbon adjacent to boron was missing) δ 138.02, 129.20, 128.87,

128.33, 127.87, 120.21 (dd,  $J = 275.5, 272.3$  Hz), 108.12, 102.03, 79.72, 77.17, 68.80, 62.69, 43.97, 32.80, 32.72, 26.54, 25.11, 25.09, 23.08;  $^{11}\text{B}$  NMR (128 MHz,  $\text{CDCl}_3$ )  $\delta$  44.54 (s) ppm. IR (KBr):  $\nu_{\text{max}} = 2976, 2869, 1607, 1514, 1465, 1437, 1389, 1368, 1333, 1279, 1248, 1143, 1099, 1057, 1012, 981, 910, 959, 882, 852, 801, 772, 730$   $\text{cm}^{-1}$ . MS (ESI): 424 ( $\text{M}+\text{H}^+$ ). HRMS (ESI) for  $\text{C}_{21}\text{H}_{29}^{10}\text{BF}_2\text{NO}_3\text{S}$  ( $\text{M}+\text{H}^+$ ): Calcd: 423.1960; Found: 423.1956.

(±)-2-((3*R*,4*R*)-4-(benzo[*b*]thiophen-5-yl)-3-(difluoromethylthio)tetrahydro-2*H*-pyran-4-yl)-4,4,5,5-tetramethyl-1,3,2-dioxaborolane **3l**

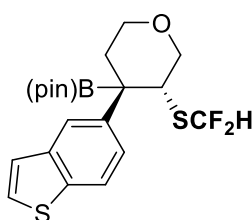

Prepared according to *GPIb* using 5-bromothianaphthene (70 mg, 0.33 mmol, 1.1 equiv.),  $t\text{BuLi}$  in hexane (0.50 mL, 1.3 M, 0.66 mmol, 2.2 equiv.), 3,6-dihydro-2*H*-pyran-4-boronic acid pinacol ester (63 mg, 0.30 mmol, 1.0 equiv.) and reagent **2a** (100 mg, 0.450 mmol, 1.5 equiv.) to give compound **3l** as a yellow oil (90 mg, 70%). Eluent: ethyl acetate/petroleum ether (1:10,  $R_f = 0.3$ ).  $^1\text{H}$  NMR (400 MHz,  $\text{CDCl}_3$ )  $\delta$  8.38 (s, 1 H), 7.86 (s, 2 H), 7.40 (d,  $J = 5.4$  Hz, 1 H), 7.37 (d,  $J = 5.4$  Hz, 1 H), 6.50 (t,  $J = 56.2$  Hz, 1 H), 4.54 (dd,  $J = 11.4, 1.9$  Hz, 1 H), 4.06 (td,  $J = 11.4, 2.2$  Hz, 1 H), 3.82 – 3.69 (m, 2 H), 3.41 (d,  $J = 1.9$  Hz, 1 H), 2.63 (ddd,  $J = 14.1, 11.6, 4.8$  Hz, 1 H), 1.74 (dd,  $J = 14.1, 1.8$  Hz, 1 H), 1.51 (s, 3 H), 1.35 (s, 3 H), 1.30 (s, 3 H), 1.20 (s, 3 H);  $^{19}\text{F}$  NMR (376 MHz,  $\text{CDCl}_3$ )  $\delta$  -91.90 (dd,  $J = 239.3, 55.8$  Hz), -93.34 (dd,  $J = 239.4, 56.5$  Hz);  $^{13}\text{C}$  NMR (101 MHz,  $\text{CDCl}_3$ , signal of  $sp^3$  carbon and  $sp^2$  carbon adjacent to boron was missing)  $\delta$  141.67, 138.93, 130.31, 129.84, 125.85, 124.41, 121.39, 120.00 (dd,  $J = 275.1, 272.9$  Hz), 80.12, 77.26, 68.85, 62.53, 43.49, 32.52, 26.42, 25.08, 25.05, 23.11;  $^{11}\text{B}$  NMR (128 MHz,  $\text{CDCl}_3$ )  $\delta$  45.34 (s) ppm. IR (KBr):  $\nu_{\text{max}} = 2977, 2931, 1722, 1599, 1507, 1425, 1372, 1354, 1330, 1269, 1219, 1190, 1143, 1080, 1027, 981, 964, 851, 799, 775, 708$   $\text{cm}^{-1}$ . MS (ESI): 449 ( $\text{M}+\text{Na}^+$ ). HRMS (ESI) for  $\text{C}_{20}\text{H}_{29}^{10}\text{BF}_2\text{O}_3\text{NS}_2$  ( $\text{M}+\text{NH}_4^+$ ): Calcd: 443.1681; Found: 443.1677.

(±)-2-((3*R*,4*R*)-4-(benzofuran-5-yl)-3-(difluoromethylthio)tetrahydro-2*H*-pyran-4-yl)-4,4,5,5-tetramethyl-1,3,2-dioxaborolane **3m**

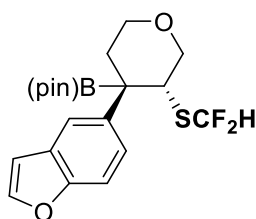

Prepared according to *GP1b* using 5-bromo-1-benzofuran (65 mg, 0.33 mmol, 1.1 equiv.), *t*BuLi in hexane (0.50 mL, 1.3 M, 0.66 mmol, 2.2 equiv.), 3,6-dihydro-2*H*-pyran-4-boronic acid pinacol ester (63 mg, 0.30 mmol, 1.0 equiv.) and reagent **2a** (100 mg, 0.450 mmol, 1.50 equiv.) to give the product as a yellow oil (96 mg, 78%). Eluent: ethyl acetate/petroleum ether (1:10,  $R_f = 0.3$ ).  $^1\text{H NMR}$  (400 MHz,  $\text{CDCl}_3$ )  $\delta$  8.20 (s, 1 H), 7.88 (dd,  $J = 8.5, 1.2$  Hz, 1 H), 7.60 (d,  $J = 2.2$  Hz, 1 H), 7.48 (d,  $J = 8.5$  Hz, 1 H), 6.79 (dd,  $J = 2.2, 0.9$  Hz, 1 H), 6.49 (t,  $J = 56.4$  Hz, 1 H), 4.55 (dd,  $J = 11.4, 1.7$  Hz, 1 H), 4.06 (td,  $J = 11.4, 2.2$  Hz, 1 H), 3.81 – 3.67 (m, 2 H), 3.39 (d,  $J = 1.9$  Hz, 1 H), 2.62 (ddd,  $J = 14.2, 11.6, 4.8$  Hz, 1 H), 1.72 (dd,  $J = 14.2, 1.8$  Hz, 1 H), 1.50 (s, 3 H), 1.35 (s, 3 H), 1.29 (s, 3 H), 1.19 (s, 3 H);  $^{19}\text{F NMR}$  (376 MHz,  $\text{CDCl}_3$ )  $\delta$  -92.13 (dd,  $J = 240.1, 55.9$  Hz), -93.35 (dd,  $J = 240.1, 56.9$  Hz);  $^{13}\text{C NMR}$  (101 MHz,  $\text{CDCl}_3$ , signal of  $sp^3$  carbon and  $sp^2$  carbon adjacent to boron was missing)  $\delta$  156.25, 144.82, 130.91, 128.39, 126.73, 120.04 (dd,  $J = 275.2, 272.6$  Hz), 110.43, 106.89, 80.03, 77.23, 68.82, 62.53, 43.60, 32.57, 26.43, 25.07, 25.03, 23.09;  $^{11}\text{B NMR}$  (128 MHz,  $\text{CDCl}_3$ )  $\delta$  44.86 (s) ppm. IR (KBr):  $\nu_{\text{max}} = 2977, 2868, 1723, 1609, 1537, 1430, 1371, 1354, 1337, 1261, 1230, 1143, 1131, 1110, 1057, 1028, 981, 963, 911, 899, 877, 849, 804, 773, 740, 685$   $\text{cm}^{-1}$ . MS (ESI): 428 ( $\text{M}+\text{NH}_4^+$ ). HRMS (ESI) for  $\text{C}_{18}\text{H}_{28}^{10}\text{BF}_2\text{O}_3\text{NSCl}$  ( $\text{M}+\text{NH}_4^+$ ): Calcd: 428.1909; Found: 428.1905.

(±)-2-((3*R*,4*R*)-3-(difluoromethylthio)-4-phenyltetrahydro-2*H*-thiopyran-4-yl)-4,4,5,5-tetramethyl-1,3,2-dioxaborolane **3n**

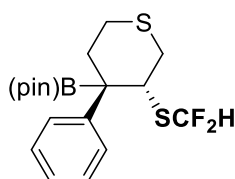

Prepared according to **GPIa** using 3,6-dihydro-2*H*-thiopyran-4-ylboronic acid pinacol ester (68 mg, 0.30 mmol, 1.0 equiv.), phenyl lithium in THF (195  $\mu$ L, 2.0 M, 0.390 mmol, 1.30 equiv.) and reagent **2a** (100 mg, 0.450 mmol, 1.50 equiv.) to give compound **3n** as a yellow oil (65 mg, 55%). Eluent: ethyl acetate/petroleum ether (1:20,  $R_f$  = 0.5). **<sup>1</sup>H NMR** (400 MHz, CDCl<sub>3</sub>)  $\delta$  7.94 (d,  $J$  = 6.9 Hz, 2 H), 7.39 (d,  $J$  = 6.4 Hz, 1 H), 7.34 (t,  $J$  = 6.5 Hz, 2 H), 6.36 (t,  $J$  = 56.7 Hz, 1 H), 4.03 (d,  $J$  = 13.3 Hz, 1 H), 3.69 (s, 1 H), 3.33 (t,  $J$  = 12.7 Hz, 1 H), 2.54 (t,  $J$  = 13.3 Hz, 1 H), 2.39 (d,  $J$  = 12.9 Hz, 1 H), 2.18 (d,  $J$  = 12.7 Hz, 1 H), 2.09 (d,  $J$  = 14.1 Hz, 1 H), 1.48 (s, 3 H), 1.32 (s, 3 H), 1.29 (s, 3 H), 1.15 (s, 3 H); **<sup>19</sup>F NMR** (376 MHz, CDCl<sub>3</sub>)  $\delta$  -92.27 (dd,  $J$  = 240.2, 57.4 Hz), -93.26 (dd,  $J$  = 240.2, 55.7 Hz); **<sup>13</sup>C NMR** (101 MHz, CDCl<sub>3</sub>, signal of  $sp^3$  carbon and  $sp^2$  carbon adjacent to boron was missing)  $\delta$  134.94, 130.43, 127.27, 119.98 (dd,  $J$  = 276.0, 272.4 Hz), 80.03, 77.22, 42.17, 31.56, 31.12, 26.28, 25.02, 24.94, 23.16, 21.17; **<sup>11</sup>B NMR** (128 MHz, CDCl<sub>3</sub>)  $\delta$  44.24 (s) ppm. **IR** (KBr):  $\nu_{\max}$  = 2978, 2927, 1597, 1434, 1375, 1367, 1338, 1275, 1261, 1219, 1145, 1072, 1054, 1019, 976, 932, 883, 861, 771, 698, 665 cm<sup>-1</sup>. **MS** (ESI): 387 (M+H<sup>+</sup>). **HRMS** (ESI) for C<sub>18</sub>H<sub>26</sub><sup>10</sup>BF<sub>2</sub>O<sub>2</sub>S<sub>2</sub> (M+H<sup>+</sup>): Calcd: 386.1466; Found: 386.1464.

**(±)-(3*R*,4*R*)-3-(difluoromethylthio)-4-phenyl-4-(4,4,5,5-tetramethyl-1,3,2-dioxaborolan-2-yl)-1-tosylpiperidine **3o****

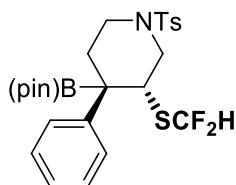

Prepared according to **GPIa** using 4-(4,4,5,5-tetramethyl-1,3,2-dioxaborolan-2-yl)-1-tosyl-1,2,3,6-tetrahydropyridine (109 mg, 0.300 mmol, 1.00 equiv.), phenyllithium in THF (195  $\mu$ L, 2.0 M, 0.390 mmol, 1.30 equiv.) and reagent **2a** (100 mg, 0.450 mmol, 1.50 equiv.) to give compound **3o** as a yellow oil (103 mg, 64%). Eluent: ethyl acetate/petroleum ether (1:10,  $R_f$  = 0.3). **<sup>1</sup>H NMR** (400 MHz, CDCl<sub>3</sub>)  $\delta$  7.88 – 7.81 (m, 2 H), 7.68 (d,  $J$  = 8.2 Hz, 2 H), 7.44 – 7.29 (m, 5 H), 6.49 (t,  $J$  = 56.7 Hz, 1 H), 3.63 (d,  $J$  = 11.3 Hz, 1 H), 3.54 – 3.48 (m, 3 H), 2.89 (dd,  $J$  = 16.5, 6.8 Hz, 1 H), 2.54 – 2.40 (m, 4 H), 1.84 (d,  $J$  = 14.1 Hz, 1 H), 1.43 (s, 3 H), 1.29 (s, 3 H), 1.12 (s, 3 H),

1.08 (s, 3 H);  $^{19}\text{F}$  NMR (376 MHz,  $\text{cdCl}_3$ )  $\delta$  -92.53 (dd,  $J = 238.8, 55.9$  Hz), -93.55 (dd,  $J = 238.8, 56.2$  Hz);  $^{13}\text{C}$  NMR (101 MHz,  $\text{CDCl}_3$ , signal of  $sp^3$  carbon and  $sp^2$  carbon adjacent to boron was missing)  $\delta$  143.41, 134.49, 133.96, 130.33, 129.58, 127.70, 127.35, 119.70 (t,  $J = 274.5$  Hz), 80.01, 77.35, 48.10, 42.32, 40.36, 31.24, 26.31, 24.97, 24.78, 23.00, 21.54;  $^{11}\text{B}$  NMR (128 MHz,  $\text{CDCl}_3$ )  $\delta$  45.18 (s) ppm. IR (KBr):  $\nu_{\text{max}} = 2981, 1462, 1434, 1391, 1343, 1280, 1238, 1155, 1090, 1045, 1018, 956, 913, 881, 773, 746, 709, 695$   $\text{cm}^{-1}$ . MS (ESI): 524 ( $\text{M}+\text{H}^+$ ). HRMS (ESI) for  $\text{C}_{25}\text{H}_{33}^{10}\text{BF}_2\text{NO}_4\text{S}_2$  ( $\text{M}+\text{H}^+$ ): Calcd: 523.1943; Found: 523.1938.

**2-(1-(Benzo[b]thiophen-5-yl)-2-(difluoromethylthio)ethyl)-4,4,5,5-tetramethyl-1,3,2-dioxaborolane 3p**

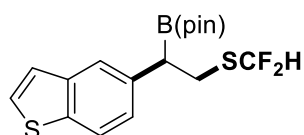

Prepared according to **GP1b** using 5-bromothiophene (1.2 g, 5.5 mmol, 1.1 equiv.),  $t\text{BuLi}$  in hexane (0.50 mL, 1.3 M, 0.66 mmol, 2.2 equiv.), pinacol vinylboronate (0.77 g, 5.0 mmol, 1.0 equiv.) and reagent **2a** (1.7 g, 7.5 mmol, 1.5 equiv.) to give compound **3p** as a yellow solid (1.38 g, 75%). Eluent: ethyl acetate/petroleum ether (1:20,  $R_f = 0.5$ ).  $^1\text{H}$  NMR (400 MHz,  $\text{CDCl}_3$ )  $\delta$  7.79 (d,  $J = 8.3$  Hz, 1 H), 7.67 (d,  $J = 1.4$  Hz, 1 H), 7.41 (d,  $J = 5.4$  Hz, 1 H), 7.28 (d,  $J = 5.4$  Hz, 1 H), 7.21 (dd,  $J = 8.3, 1.6$  Hz, 1 H), 6.77 (t,  $J = 56.8$  Hz, 1 H), 3.31 (dd,  $J = 13.0, 8.4$  Hz, 1 H), 3.18 (dd,  $J = 13.1, 8.5$  Hz, 1 H), 2.78 (t,  $J = 8.4$  Hz, 1 H), 1.24 (s, 6 H), 1.20 (s, 6 H);  $^{19}\text{F}$  NMR (376 MHz,  $\text{CDCl}_3$ )  $\delta$  -92.20 (dd,  $J = 229.1, 42.0$  Hz), -92.96 (dd,  $J = 229.1, 42.0$  Hz);  $^{13}\text{C}$  NMR (101 MHz,  $\text{CDCl}_3$ , signal of  $sp^3$  carbon adjacent to boron was missing)  $\delta$  140.10, 137.74, 136.56, 126.59, 124.94, 123.74, 123.21, 122.58, 120.96 (t,  $J = 272.5$  Hz), 84.01, 30.59 (t,  $J = 2.6$  Hz), 24.60, 24.57 ppm. IR (KBr):  $\nu_{\text{max}} = 2977, 1438, 1420, 1354, 1329, 1260, 1143, 1069, 818, 784, 713$   $\text{cm}^{-1}$ . MS (DART): 388 ( $\text{M}+\text{NH}_4^+$ ). HRMS (DART) for  $\text{C}_{17}\text{H}_{25}^{10}\text{BF}_2\text{O}_2\text{NS}_2$  ( $\text{M}+\text{NH}_4^+$ ): Calcd: 387.1419; Found: 387.1412.

**2-(2-(Difluoromethylthio)-1,1-diphenylethyl)-4,4,5,5-tetramethyl-1,3,2-dioxaborolane 3q**



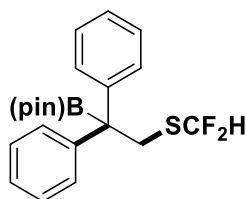

Prepared according to **GP1a** using 1-phenylvinylboronic acid, pinacol ester (69 mg, 0.30 mmol, 1.0 equiv.), phenyl lithium in THF (195  $\mu$ L, 2.0 M, 0.390 mmol, 1.30 equiv.) and reagent **2a** (100 mg, 0.450 mmol, 1.50 equiv.) to give compound **3q** as a yellow oil (73 mg, 62%). Eluent: ethyl acetate/petroleum ether (1:20,  $R_f$  = 0.5). **<sup>1</sup>H NMR** (400 MHz, CDCl<sub>3</sub>)  $\delta$  7.28 (d,  $J$  = 4.2 Hz, 8 H), 7.21 (dq,  $J$  = 8.7, 4.3 Hz, 2 H), 6.16 (t,  $J$  = 58.4 Hz, 1 H), 3.59 (s, 2 H), 1.17 (s, 12 H); **<sup>19</sup>F NMR** (376 MHz, CDCl<sub>3</sub>)  $\delta$  -93.29 (d,  $J$  = 58.4 Hz); **<sup>13</sup>C NMR** (101 MHz, CDCl<sub>3</sub>, signal of  $sp^3$  carbon and adjacent to boron was missing)  $\delta$  143.72, 129.24, 128.1, 126.32, 121.27 (t,  $J$  = 272.0 Hz), 84.32, 36.58, 24.32; **<sup>11</sup>B NMR** (128 MHz, CDCl<sub>3</sub>)  $\delta$  32.63 (s) ppm. **IR** (KBr):  $\nu_{max}$  = 2954, 2924, 2852, 1495, 1462, 1444, 1377, 1027, 896, 772, 697  $cm^{-1}$ . **MS** (ESI): 408 (M+NH<sub>4</sub><sup>+</sup>). **HRMS** (ESI) for C<sub>21</sub>H<sub>29</sub><sup>10</sup>BF<sub>2</sub>NO<sub>2</sub>S (M+H<sup>+</sup>): Calcd: 407.2011; Found:407.2008.

**(±)-(1*S*,2*R*,3*R*,5*R*)-8-benzyl-2-(difluoromethylthio)-3-phenyl-3-(4,4,5,5-tetramethyl-1,3,2-dioxaborolan-2-yl)-8-azabicyclo[3.2.1]octane 3s**

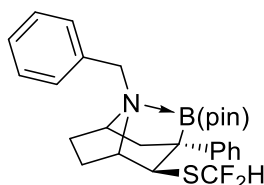

Prepared according to **GP1a** using 8-(phenylmethyl)-3-(4,4,5,5-tetramethyl-1,3,2-dioxaborolan-2-yl)-8-azabicyclo[3.2.1]oct-2-ene (98 mg, 0.30 mmol, 1.0 equiv.), phenyl lithium in THF (195  $\mu$ L, 2.0 M, 0.390 mmol, 1.30 equiv.) and reagent **2a** (100 mg, 0.450 mmol, 1.50 equiv.) to give compound **3r** as a white solid (62 mg, 43%). Eluent: ethyl acetate/petroleum ether (1:5,  $R_f$  = 0.5). **<sup>1</sup>H NMR** (400 MHz, CDCl<sub>3</sub>)  $\delta$  7.64 (d,  $J$  = 7.3 Hz, 2 H), 7.41 – 7.26 (m, 7 H), 7.12 (d,  $J$  = 6.7 Hz, 1 H), 6.78 (t,  $J$  = 56.1 Hz, 1 H), 4.14 – 3.86 (m, 3 H), 3.61 (s, 1 H), 3.09 (s, 1 H), 2.95 – 2.82 (m, 1 H), 1.75 – 1.61 (m, 1 H), 1.55 – 1.41 (m, 1 H), 1.37 (s, 2 H), 1.24 (s, 6 H), 1.15 (s, 6 H); **<sup>19</sup>F NMR** (376 MHz, CDCl<sub>3</sub>)  $\delta$  -91.83 (d,  $J$  = 217.9 Hz), -94.28 (dd,  $J$  = 241.2, 61.7

Hz);  $^{13}\text{C}$  NMR (101 MHz,  $\text{CDCl}_3$ , signal of  $sp^3$  carbon and adjacent to boron was missing)  $\delta$  143.64, 135.31, 130.72, 128.76, 128.61, 128.50, 127.22, 124.70, 121.62 (t,  $J = 273.9$  Hz), 80.66, 72.72, 60.41, 55.99, 55.16, 48.05, 31.65, 30.55, 27.72, 26.73;  $^{11}\text{B}$  NMR (128 MHz,  $\text{CDCl}_3$ )  $\delta$  15.86 (s) ppm. IR (KBr):  $\nu_{\text{max}} = 2971, 2928, 1495, 1456, 1385, 1372, 1325, 1191, 1179, 1134, 1100, 1076, 1042, 1001, 911, 861, 768, 758, 734, 704, 626$   $\text{cm}^{-1}$ . MS (ESI): 486 ( $\text{M}+\text{H}^+$ ). HRMS (ESI) for  $\text{C}_{27}\text{H}_{35}^{10}\text{BF}_2\text{NO}_2\text{S}$  ( $\text{M}+\text{H}^+$ ): Calcd: 485.2480; Found: 485.2479.

### 2-(Difluoromethylthio)-1-phenylethanol **4a**

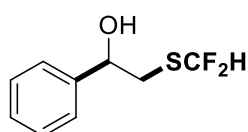

Prepared according to *GPIc* pinacol vinylboronate (47 mg, 0.30 mmol, 1.0 equiv.), phenyl lithium in THF (195  $\mu\text{L}$ , 2.0 M, 0.390 mmol, 1.30 equiv.), reagent **2a** (100 mg, 0.450 mmol, 1.50 equiv.) and  $\text{NaBO}_3$  (74 mg, 0.90 mmol, 3.0 equiv.) to give compound **4a** as a yellow oil (43 mg, 71%). Eluent: ethyl acetate/petroleum ether (1:5,  $R_f = 0.5$ ).  $^1\text{H}$  NMR (400 MHz,  $\text{CDCl}_3$ )  $\delta$  7.49 – 7.29 (m, 5 H), 6.86 (t,  $J = 56.6$  Hz, 1 H), 5.00 – 4.84 (m, 1 H), 3.15 (dd,  $J = 14.2, 3.9$  Hz, 1 H), 3.03 (dd,  $J = 14.2, 8.8$  Hz, 1 H), 2.54 (d,  $J = 3.1$  Hz, 1 H);  $^{19}\text{F}$  NMR (376 MHz,  $\text{CDCl}_3$ )  $\delta$  -91.98 (dd,  $J = 220.1, 33.8$  Hz), -92.71 (dd,  $J = 220.2, 34.2$  Hz);  $^{13}\text{C}$  NMR (101 MHz,  $\text{CDCl}_3$ )  $\delta$  141.91, 128.69, 128.31, 125.77, 120.50 (t,  $J = 273.3$  Hz), 73.65, 36.26 (t,  $J = 2.4$  Hz) ppm. IR (KBr):  $\nu_{\text{max}} = 3395, 2928, 1436, 1423, 1325, 1236, 1144, 1051, 1021, 897, 817, 765, 743, 703$   $\text{cm}^{-1}$ . MS (EI):  $m/z$  (%) 204, 107 (100), 79. HRMS: Calcd for  $\text{C}_9\text{H}_{10}\text{F}_2\text{SO}$ : 204.0420; Found: 204.0423.

### 1-(Difluoromethylthio)-2-phenylpropan-2-ol **4b**

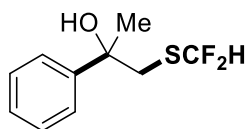

Prepared according to *GPIc* using isopropenyl boronic acid pinacol ester (51 mg, 0.30 mmol, 1.0 equiv.), phenyl lithium in THF (195  $\mu\text{L}$ , 2.0 M, 0.390 mmol, 1.30 equiv.), reagent **2a** (100 mg, 0.450 mmol, 1.50 equiv.) and  $\text{NaBO}_3$  (74 mg, 0.90 mmol, 3.0

equiv.) to give the product as a yellow oil (40 mg, 61%). Eluent: ethyl acetate/petroleum ether (1:5,  $R_f$  = 0.6).  $^1\text{H NMR}$  (400 MHz,  $\text{CDCl}_3$ )  $\delta$  7.53 – 7.17 (m, 5 H), 6.70 (t,  $J$  = 57.0 Hz, 1 H), 3.31 (d,  $J$  = 13.9 Hz, 1 H), 3.16 (d,  $J$  = 13.9 Hz, 1 H), 2.44 (s, 1 H), 1.67 (s, 3 H);  $^{19}\text{F NMR}$  (376 MHz,  $\text{CDCl}_3$ )  $\delta$  -91.64 (dd,  $J$  = 242.9, 57.3 Hz), -92.50 (dd,  $J$  = 242.9, 56.8 Hz);  $^{13}\text{C NMR}$  (101 MHz,  $\text{CDCl}_3$ )  $\delta$  145.71, 128.49, 127.47, 124.72, 120.30 (t,  $J$  = 273.3 Hz), 73.50, 41.36, 29.03 ppm. **IR** (KBr):  $\nu_{\text{max}}$  = 3445, 2979, 1494, 1446, 1376, 1326, 1248, 1215, 1182, 1062, 1027, 943, 914, 767, 699  $\text{cm}^{-1}$ . **MS** (EI):  $m/z$  (%) 218, 121 (100), 77. **HRMS**: Calcd for  $\text{C}_{10}\text{H}_{12}\text{F}_2\text{SO}$ : 218.0577; Found: 218.0571.

### 2-(Difluoromethylthio)-2-methyl-1-phenylpropan-1-ol **4c**

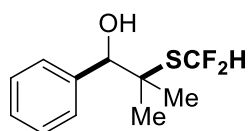

Prepared according to **GPIc** using 2,2-dimethylethenylboronic acid pinacol ester (55 mg, 0.30 mmol, 1.0 equiv.), phenyl lithium in THF (195  $\mu\text{L}$ , 2.0 M, 0.390 mmol, 1.30 equiv.), reagent **2a** (100 mg, 0.450 mmol, 1.50 equiv.) and  $\text{NaBO}_3$  (74 mg, 0.90 mmol, 3.0 equiv.) to give compound **4c** as a yellow oil (32 mg, 45%). Eluent: ethyl acetate/petroleum ether (1:5,  $R_f$  = 0.6).  $^1\text{H NMR}$  (400 MHz,  $\text{CDCl}_3$ )  $\delta$  7.45 – 7.32 (m, 5 H), 7.14 (t,  $J$  = 56.9 Hz, 1 H), 4.79 (s, 1 H), 2.82 – 2.50 (m, 1 H), 1.42 (s, 3 H), 1.30 (s, 3 H);  $^{19}\text{F NMR}$  (376 MHz,  $\text{CDCl}_3$ )  $\delta$  -89.54 (dd,  $J$  = 254.5, 57.5 Hz), -91.25 (dd,  $J$  = 254.6, 56.4 Hz);  $^{13}\text{C NMR}$  (101 MHz,  $\text{CDCl}_3$ )  $\delta$  139.32, 128.42, 128.12, 128.04, 121.46 (dd,  $J$  = 269.5, 268.5 Hz), 81.35, 27.37, 23.62 ppm. **IR** (KBr):  $\nu_{\text{max}}$  = 3445, 2973, 1453, 1389, 1300, 1125, 1053, 1026, 912, 791, 748, 702  $\text{cm}^{-1}$ . **MS** (EI):  $m/z$  (%) 232, 107 (100), 79. **HRMS**: Calcd for  $\text{C}_{11}\text{H}_{14}\text{F}_2\text{SO}$ : 232.0733; Found: 232.0735.

### (±)-(1*R*,2*R*)-2-cyclopentyl-2-(difluoromethylthio)-1-phenylethanol **4d**

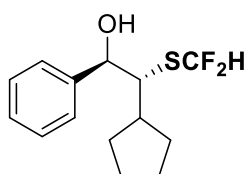

Prepared according to **GPIc** using (E)-2-(2-cyclopentylvinyl)-4,4,5,5-tetramethyl-1,3,2-dioxaborolane (67 mg, 0.30

mmol, 1.0 equiv.), phenyl lithium in THF (195  $\mu\text{L}$ , 2.0 M, 0.390 mmol, 1.30 equiv.), reagent **2a** (100 mg, 0.450 mmol, 1.50 equiv.) and  $\text{NaBO}_3$  (74 mg, 0.90 mmol, 3.0 equiv.) to give compound **4d** as a yellow oil (32 mg, 45%). Eluent: ethyl acetate/petroleum ether (1:5,  $R_f = 0.6$ ).  $^1\text{H NMR}$  (400 MHz,  $\text{CDCl}_3$ )  $\delta$  7.43 – 7.29 (m, 5 H), 6.65 (dd,  $J = 60.3, 55.8$  Hz, 1 H), 4.72 (d,  $J = 6.8$  Hz, 1 H), 3.27 (t,  $J = 6.1$  Hz, 1 H), 2.68 (s, 1 H), 2.03 – 1.88 (m, 1 H), 1.79 (d,  $J = 7.7$  Hz, 1 H), 1.71 (dd,  $J = 16.5, 12.6$  Hz, 1 H), 1.64 (s, 2 H), 1.54 (dd,  $J = 13.4, 6.7$  Hz, 1 H), 1.53 – 1.41 (m, 2 H), 1.31 – 1.16 (m, 1 H);  $^{19}\text{F NMR}$  (376 MHz,  $\text{CDCl}_3$ )  $\delta$  -88.99 (dd,  $J = 245.0, 60.3$  Hz), -92.88 (dd,  $J = 245.0, 55.8$  Hz);  $^{13}\text{C NMR}$  (101 MHz,  $\text{CDCl}_3$ )  $\delta$  141.59, 128.53, 128.16, 126.44, 120.85 (dd,  $J = 276.1, 269.8$  Hz), 76.24, 58.02, 40.62, 31.11, 29.15, 25.49, 25.18 ppm. **IR** (KBr):  $\nu_{\text{max}} = 3439, 2954, 2868, 1452, 1323, 1296, 1190, 1064, 1028, 771, 732, 700$   $\text{cm}^{-1}$ . **MS** (EI):  $m/z$  (%) 272, 107 (100), 79. **HRMS**: Calcd for  $\text{C}_{14}\text{H}_{18}\text{F}_3\text{SO}$ : 272.1046; Found: 272.1042.

**(±)-(1*S*,2*S*)-2-(difluoromethylthio)-1,5-diphenylpentan-1-ol 4e**

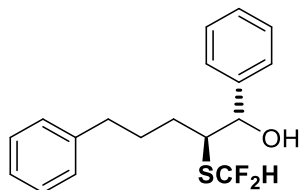

Prepared according to **GPIc** using (E)-4,4,5,5-tetramethyl-2-(5-phenylpent-1-enyl)-1,3,2-dioxaborolane (82 mg, 0.30 mmol, 1.0 equiv.), phenyl lithium in THF (195  $\mu\text{L}$ , 2.0 M, 0.390 mmol, 1.30 equiv.), reagent **2a** (100 mg, 0.450 mmol, 1.50 equiv.) and  $\text{NaBO}_3$  (74 mg, 0.90 mmol, 3.0 equiv.) to give compound **4e** as a yellow oil (65 mg, 70%). Eluent: ethyl acetate/petroleum ether (1:5,  $R_f = 0.7$ ).  $^1\text{H NMR}$  (400 MHz,  $\text{CDCl}_3$ )  $\delta$  7.39 – 7.29 (m, 5 H), 7.24 (dd,  $J = 10.1, 4.6$  Hz, 2 H), 7.16 (t,  $J = 7.3$  Hz, 1 H), 7.09 (d,  $J = 7.1$  Hz, 2 H), 6.73 (dd,  $J = 59.5, 55.7$  Hz, 1 H), 4.64 (dd,  $J = 7.2, 3.2$  Hz, 1 H), 3.29 – 3.19 (m, 1 H), 2.67 – 2.54 (m, 2 H), 2.52 – 2.42 (m, 1 H), 1.96 – 1.81 (m, 1 H), 1.77 – 1.56 (m, 2 H), 1.52 – 1.39 (m, 1 H);  $^{19}\text{F NMR}$  (376 MHz,  $\text{CDCl}_3$ )  $\delta$  -89.41 (dd,  $J = 246.0, 59.6$  Hz), -92.50 (dd,  $J = 246.0, 55.7$  Hz);  $^{13}\text{C NMR}$  (101 MHz,  $\text{CDCl}_3$ )  $\delta$  141.71, 141.09, 128.50, 128.31, 128.30, 128.27, 126.63, 125.80, 120.68 (dd,  $J = 275.6, 270.1$  Hz), 76.88, 52.27, 35.18, 31.30, 28.40 ppm. **IR** (KBr):  $\nu_{\text{max}} = 3434,$

3061, 3026, 2930, 2859, 1494, 1452, 1324, 1189, 1059, 1027, 913, 794, 769, 750, 700  $\text{cm}^{-1}$ . **MS** (ESI): 340 ( $\text{M}+\text{NH}_4^+$ ). **HRMS** (ESI) for  $\text{C}_{18}\text{H}_{28}^{10}\text{BF}_2\text{O}_3\text{NSCl}$  ( $\text{M}+\text{NH}_4^+$ ): Calcd: 340.1541; Found: 340.1538.

**(±)-(1*R*,2*S*)-2-(difluoromethylthio)-1,5-diphenylpentan-1-ol 4f**

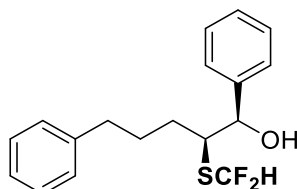

Prepared according to **GPIc** using (Z)-4,4,5,5-tetramethyl-2-(5-phenylpent-1-enyl)-1,3,2-dioxaborolane (82 mg, 0.30 mmol, 1.0 equiv.), phenyl lithium in THF (195  $\mu\text{L}$ , 2.0 M, 0.390 mmol, 1.30 equiv.), reagent **2a** (100 mg, 0.450 mmol, 1.50 equiv.) and  $\text{NaBO}_3$  (74 mg, 0.90 mmol, 3.0 equiv.) to give compound **4f** as a yellow oil (69 mg, 74%). Eluent: ethyl acetate/petroleum ether (1:5,  $R_f = 0.7$ ).  **$^1\text{H}$  NMR** (400 MHz,  $\text{CDCl}_3$ )  $\delta$  7.39 – 7.26 (m, 5 H), 7.23 (t,  $J = 7.3$  Hz, 2 H), 7.15 (t,  $J = 7.3$  Hz, 1 H), 7.07 (d,  $J = 7.0$  Hz, 2 H), 6.74 (dd,  $J = 57.4, 56.3$  Hz, 1 H), 5.00 (t,  $J = 3.7$  Hz, 1 H), 3.41 (dt,  $J = 10.4, 3.6$  Hz, 1 H), 2.63 – 2.43 (m, 2 H), 2.40 (d,  $J = 4.0$  Hz, 1 H), 1.96 – 1.81 (m, 1 H), 1.74 – 1.58 (m, 2 H), 1.52 – 1.38 (m, 1 H);  **$^{19}\text{F}$  NMR** (376 MHz,  $\text{CDCl}_3$ )  $\delta$  -90.16 (dd,  $J = 243.7, 57.6$  Hz), -92.24 (dd,  $J = 243.7, 56.1$  Hz);  **$^{13}\text{C}$  NMR** (101 MHz,  $\text{CDCl}_3$ )  $\delta$  141.84, 140.62, 128.31, 128.30, 128.28, 127.93, 126.38, 125.75, 120.65 (t,  $J = 272.0$  Hz), 76.66, 50.59, 35.21, 28.65, 28.27 ppm. **IR** (KBr):  $\nu_{\text{max}} = 3445, 3207, 2938, 2860, 1495, 1452, 1342, 1054, 1027, 913, 792, 747, 700$   $\text{cm}^{-1}$ . **MS** (ESI): 340 ( $\text{M}+\text{NH}_4^+$ ). **HRMS** (ESI) for  $\text{C}_{18}\text{H}_{28}^{10}\text{BF}_2\text{O}_3\text{NSCl}$  ( $\text{M}+\text{NH}_4^+$ ): Calcd: 340.1541; Found: 340.1538.

## General Procedure for the Lithiation-Borylation of 2,4,6-Trisopropylbenzoates<sup>[1]</sup>

### General Procedure 2 (GP2)

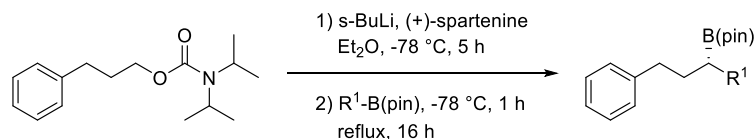

s-Butyl lithium (3.3 mL, 1.3 N, 4.2 mmol, 1.2 equiv.) was added dropwise to a solution of the benzoate (0.91 g, 3.5 mmol, 1.0 equiv) and (+)-sparteine (0.98 g, 4.2 mmol, 1.2 equiv.) in Et<sub>2</sub>O (20.0 mL) at -78 °C. The resulting mixture was stirred at -78 °C for 5 h, followed by addition of 4,4,5,5-tetramethyl-2-(2-methylpropyl)-1,3,2-dioxaborolane (0.77 g, 4.2 mmol, 1.2 equiv.) dropwise. The mixture was further stirred at -78 °C for 1 h and was then allowed to warm up to room temperature and refluxed for 16 h. After cooling to room temperature, water (20.0 mL) was added, the organic layers were separated and the aqueous layer was extracted with Et<sub>2</sub>O (20.0 mL × 3). The combined organic layers were washed with HCl (10 mL, 1.0 N), NaOH (10 mL, 1.0 N), water and brine, and dried over anhydrous MgSO<sub>4</sub>. The solvent was removed in vacuo and the residue was purified by flash column chromatography to give the corresponding boronic piconal ester **5a**.

Racemic boronic esters were obtained by using TMEDA instead of (+)-sparteine.

### (S)-4,4,5,5-tetramethyl-2-(5-methyl-1-phenylhexan-3-yl)-1,3,2-dioxaborolane **5a**

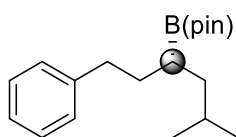

Prepared according to **GP2** using s-butyl lithium (3.3 mL, 1.3 N, 4.2 mmol, 1.2 equiv.) benzoate (0.91 g, 3.5 mmol, 1.0 equiv.), (+)-sparteine (0.98 g, 4.2 mmol, 1.2 equiv.) and 4,4,5,5-tetramethyl-2-(2-methylpropyl)-1,3,2-dioxaborolane (0.77 g, 4.2 mmol, 1.2 equiv.) to give the desired boronic ester **5a** as a colorless oil (225 mg, 21%).  
Eluent: ethyl acetate/petroleum ether (1:100,  $R_f$  = 0.5). **<sup>1</sup>H NMR** (400 MHz, CDCl<sub>3</sub>) δ 7.31 – 7.12 (m, 5 H), 2.68 – 2.52 (m, 2 H), 1.75 – 1.61 (m, 2 H), 1.44 – 1.33 (m, 1 H), 1.26 (s, 12 H), 1.18 – 1.07 (m, 1 H), 0.93 (d,  $J$  = 6.6 Hz, 2 H), 0.90 – 0.82 (m, 6 H); **<sup>13</sup>C NMR** (151 MHz, CDCl<sub>3</sub>, signal of  $sp^3$  carbon adjacent to boron was missing) δ

143.10, 128.35, 128.20, 125.51, 82.88, 40.49, 35.66, 33.75, 27.27, 24.86, 24.78, 23.05, 22.55;  $^{11}\text{B}$  NMR (193 MHz,  $\text{CDCl}_3$ )  $\delta$  33.75 (s) ppm. IR (KBr):  $\nu_{\text{max}} = 2977, 2953, 2926, 2867, 1454, 1379, 1370, 1317, 1251, 1165, 1144, 698 \text{ cm}^{-1}$ . MS (EI):  $m/z$  (%) 302, 174, 155, 91 (100). HRMS: Calcd for  $\text{C}_{19}\text{H}_{31}^{10}\text{BO}_2$ : 301.2453; Found: 301.2451. HPLC (C1,  $0.46 \times 25 \text{ cm}$ ,  $5 \mu\text{m}$ , carbon dioxide/isopropanol = 95/5 (v/v %), flow 2.0 mL/min, UV detection at 214 nm, 2000 psi,  $40 \text{ }^\circ\text{C}$ ), retention time = 6.06 min (major) and 7.32 min (minor).  $[\alpha]_{\text{D}}^{20} = -16.46$  ( $c = 0.130 \text{ g}/100 \text{ mL}$ ,  $\text{CH}_3\text{Cl}$ ). ee = 94%.

**(R)-4,4,5,5-tetramethyl-2-(1-phenylhept-6-en-3-yl)-1,3,2-dioxaborolane 5b**

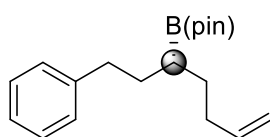

Prepared according to **GP2** using s-butyl lithium (3.2 mL, 1.3 N, 4.1 mmol, 1.2 equiv.), the benzoate (0.90 g, 3.4 mmol, 1.0 equiv.), (+)-sparteine (0.96 g, 4.1 mmol, 1.2 equiv.) and 2-but-3-enyl-4,4,5,5-tetramethyl-1,3,2-dioxaborolane (0.75 g, 4.1 mmol, 1.2 equiv.) to give the desired boronic ester **5b** as a colorless oil (150 mg, 15%). Eluent: ethyl acetate/petroleum ether (1:100,  $R_f = 0.5$ ).  $^1\text{H}$  NMR (600 MHz,  $\text{CDCl}_3$ )  $\delta$  7.28 – 7.24 (m, 2 H), 7.27 – 7.25 (m, 3 H), 5.81 (ddt,  $J = 16.9, 10.2, 6.7 \text{ Hz}$ , 1 H), 5.01 – 4.90 (m, 2 H), 2.67 – 2.54 (m, 2 H), 2.13 – 2.01 (m, 2 H), 1.78 – 1.72 (m, 1 H), 1.70 – 1.63 (m, 1 H), 1.60 – 1.54 (m, 1 H), 1.52 – 1.45 (m, 1 H), 1.26 (s, 12 H), 1.10 – 1.05 (m, 1 H);  $^{13}\text{C}$  NMR (151 MHz,  $\text{CDCl}_3$ , signal of  $sp^3$  carbon adjacent to boron was missing)  $\delta$  142.99, 139.10, 128.36, 128.20, 125.54, 114.27, 82.96, 35.54, 33.36, 33.34, 30.50, 24.84, 24.81;  $^{11}\text{B}$  NMR (193 MHz,  $\text{CDCl}_3$ )  $\delta$  34.29 (s) ppm. IR (KBr):  $\nu_{\text{max}} = 3025, 2977, 2925, 2855, 1496, 1454, 1409, 1380, 1371, 1317, 1263, 1233, 1214, 1165, 1144, 966, 908, 851, 747, 698 \text{ cm}^{-1}$ . MS (EI):  $m/z$  (%) 300, 172, 155, 91 (100). HRMS: Calcd for  $\text{C}_{19}\text{H}_{29}^{10}\text{BO}_2$ : 299.2297; Found: 299.2301. HPLC (ODH,  $0.46 \times 25 \text{ cm}$ ,  $5 \mu\text{m}$ , hexane/isopropanol = 9/1 (v/v %), flow 0.7 mL/min, UV detection at 214 nm), retention time = 8.71 min (major) and 10.98 min (minor).  $[\alpha]_{\text{D}}^{20} = -7.73$  ( $c = 0.150 \text{ g}/100 \text{ mL}$ ,  $\text{CH}_3\text{Cl}$ ). ee = 91%.

**(S)-2-(1-cyclopropyl-3-phenylpropyl)-4,4,5,5-tetramethyl-1,3,2-dioxaborolane 5c**

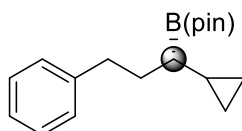

Prepared according to **GP2** using *s*-butyl lithium (4.6 mL, 1.3 N, 6.0 mmol, 1.2 equiv.), the benzoate (1.3 g, 5.0 mmol, 1.0 equiv.), (+)-sparteine (1.4 g, 6.0 mmol, 1.2 equiv.) and cyclopropylboronic acid pinacol ester (1.0 g, 6.0 mmol, 1.2 equiv.) to give the desired boronic ester **5c** as a colorless oil (280 mg, 19%). Eluent: ethyl acetate/petroleum ether (1:100,  $R_f = 0.5$ ).  **$^1\text{H NMR}$**  (500 MHz,  $\text{CDCl}_3$ )  $\delta$  7.30 – 7.24 (m, 2 H), 7.20 – 7.14 (m, 3 H), 2.64 (td,  $J = 8.3, 4.0$  Hz, 2 H), 1.90 – 1.75 (m, 2 H), 1.27 (s, 12 H), 0.71 (ddt,  $J = 9.6, 8.1, 4.8$  Hz, 1 H), 0.49 – 0.36 (m, 3 H), 0.13 – 0.08 (m, 1 H), 0.04 (td,  $J = 9.0, 4.1$  Hz, 1 H);  **$^{13}\text{C NMR}$**  (126 MHz,  $\text{CDCl}_3$ , signal of  $sp^3$  carbon adjacent to boron was missing)  $\delta$  143.11, 128.36, 128.19, 125.51, 82.97, 35.78, 33.70, 24.84, 23.84, 12.45, 5.29, 3.49;  **$^{11}\text{B NMR}$**  (160 MHz,  $\text{CDCl}_3$ )  $\delta$  33.49 (s) ppm. **IR** (KBr):  $\nu_{\text{max}} = 33025, 2977, 2926, 2857, 1496, 1454, 1378, 1370, 1318, 1270, 1242, 1214, 1165, 1144, 1106, 1014, 967, 848, 747, 698$   $\text{cm}^{-1}$ . **MS** (EI):  $m/z$  (%) 286, 201, 158, 91 (100). **HRMS**: Calcd for  $\text{C}_{18}\text{H}_{27}^{10}\text{BO}_2$ : 285.2140; Found: 285.2148. **HPLC** (C-1,  $0.46 \times 25$  cm,  $5 \mu\text{m}$ , carbon dioxide/isopropanol = 95/5 (v/v %), flow 2.0 mL/min, UV detection at 214 nm, 2000 psi,  $40^\circ\text{C}$ ), retention time = 7.66 min (major) and 9.40 min (minor).  $[\alpha]_{\text{D}}^{20} = -8.75$  ( $c = 0.160$  g/100 mL,  $\text{CH}_3\text{Cl}$ ). ee = 96%.



## General Procedure for Synthesis of $\alpha$ -Chiral Ketones by Stereospecific 1,2-Migration.

### General Procedure 3 (GP3)

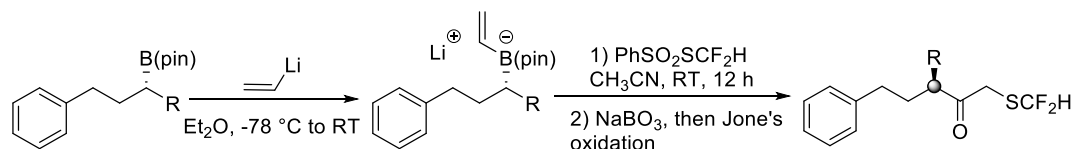

An oven-dried, 25-mL Schlenk flask equipped with a stir bar, septum, and digital thermocouple probe was charged with Et<sub>2</sub>O (2.0 mL) and vinyl bromide (1.0 M in THF, 0.36 mL, 0.36 mmol, 1.2 equiv.). The mixture was cooled to -78 °C. A solution of *t*-BuLi (1.3 M in hexane, 0.55 mL, 0.72 mmol, 2.4 equiv.) was added dropwise. The mixture was stirred at -78 °C for 30 min. (S)-4,4,5,5-Tetramethyl-2-(5-methyl-1-phenylhexan-3-yl)-1,3,2-dioxaborolane (91 mg, 0.30 mmol, 1.0 equiv.) was added dropwise. The resulting mixture was stirred at -78 °C for 15 min, then warmed to room temperature for another 15 min. The solvent was carefully removed under reduced pressure to give the corresponding vinylboronate complex as a white solid, which was used directly without further purification. To the solid was added CH<sub>3</sub>CN (3.0 mL) and reagent **2a** (100 mg, 0.45 mmol, 1.5 equiv.). This mixture was stirred at room temperature for 12 h. The solvent was removed under reduced pressure, then NaBO<sub>3</sub> (74 mg, 0.90 mmol, 3.0 equiv.) and THF/H<sub>2</sub>O (v/v = 1:1, 6.0 mL) was added. The mixture was stirred at room temperature for 6 h. Half of the solvent was removed under reduced pressure. The aqueous layer was extracted with ethyl acetate (10 mL  $\times$  3), and the combined organic layers were dried over anhydrous magnesium sulfate, filtered, and concentrated. To the residue was added acetone (5.0 mL) and Jones's reagent (3.0 N, 2.5 mL, 0.45 mmol, 1.5 equiv.) at 0 °C. The mixture was stirred at 0 °C for 1 h. The reaction was quenched by the addition of EtOH (2.0 mL). The solvent was removed in vacuo and the residue was purified by flash column chromatography (Eluent: ethyl acetate/petroleum ether = 1:10, R<sub>f</sub> = 0.5) to give compound **6a** as a colorless oil (45 mg, 50%).

**(S)-1-(difluoromethylthio)-5-methyl-3-phenethylhexan-2-one 6a**

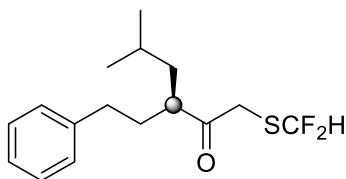

Prepared according to **GP3** using vinyl bromide (1.0 M in THF, 0.36 mL, 0.36 mmol, 1.2 equiv.), <sup>t</sup>BuLi (1.3 M in hexane, 0.55 mL, 0.72 mmol, 2.4 equiv.), (S)-4,4,5,5-tetramethyl-2-(5-methyl-1-phenylhexan-3-yl)-1,3,2-dioxaborolane (91 mg, 0.30 mmol, 1.0 equiv.), reagent **2a** (100 mg, 0.45 mmol, 1.5 equiv.), NaBO<sub>3</sub> (74 mg, 0.90 mmol, 3.0 equiv.) and Jone's reagent (3.0 N, 0.15 mL, 0.45 mmol, 1.5 equiv.) to give compound **6a** as a colorless oil (45 mg, 50%). Eluent: ethyl acetate/petroleum ether (1:10, R<sub>f</sub> = 0.5). <sup>1</sup>H NMR (400 MHz, CDCl<sub>3</sub>) δ 7.29 (t, *J* = 7.5 Hz, 2 H), 7.20 (t, *J* = 7.1 Hz, 1 H), 7.15 (d, *J* = 7.5 Hz, 2 H), 6.86 (t, *J* = 56.5 Hz, 1 H), 3.74 – 3.61 (m, 2 H), 2.80 – 2.71 (m, 1 H), 2.65 – 2.50 (m, 2 H), 1.96 (dt, *J* = 14.7, 8.4 Hz, 1 H), 1.80 – 1.70 (m, 1 H), 1.59 – 1.48 (m, 2 H), 1.37 – 1.25 (m, 1 H), 0.89 (d, *J* = 6.3 Hz, 3 H), 0.87 (d, *J* = 6.2 Hz, 3 H); <sup>13</sup>C NMR (151 MHz, CDCl<sub>3</sub>) δ 207.07, 141.21, 128.49, 128.32, 126.13, 119.46 (t, *J* = 273.9 Hz), 48.55, 40.76, 36.50, 33.42, 33.27, 25.99, 22.66, 22.50; <sup>19</sup>F NMR (376 MHz, CDCl<sub>3</sub>) δ -94.01 (d, *J* = 56.5 Hz) ppm. IR (KBr): ν<sub>max</sub> = 2956, 2930, 2869, 1713, 1454, 1326, 1063, 1029, 749, 700 cm<sup>-1</sup>. MS (EI): *m/z* (%) 300, 203, 196, 91 (100). HRMS: Calcd for C<sub>16</sub>H<sub>22</sub>F<sub>2</sub>SO: 300.1359; Found: 300.1352. HPLC (AY3, 0.46 × 15 cm, 3 μm, hexane/isopropanol = 95/5 (v/v %), flow 0.7 mL/min, UV detection at 214 nm), retention time = 4.58 min (minor) and 4.84 min (major). [α]<sub>D</sub><sup>20</sup> = -11.80 (c = 0.100 g/100 mL, CH<sub>3</sub>Cl). ee = 95%.

**(R)-1-(difluoromethylthio)-3-phenethylhept-6-en-2-one 6b**

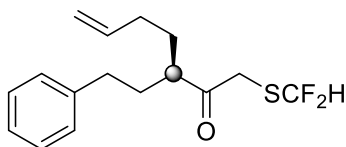

Prepared according to **GP3** using vinyl bromide (1.0 M in THF, 0.36 mL, 0.36 mmol, 1.2 equiv.), <sup>t</sup>BuLi (1.3 M in hexane, 0.55 mL, 0.72 mmol, 2.4 equiv.), (R)-4,4,5,5-tetramethyl-2-(1-phenylhept-6-en-3-yl)-1,3,2-dioxaborolane (90 mg, 0.30 mmol, 1.0 equiv.), reagent **2a** (100 mg, 0.45 mmol, 1.5 equiv.), NaBO<sub>3</sub> (74 mg, 0.90 mmol, 3.0 equiv.) and Jone's reagent (3.0 N, 0.15 mL, 0.45 mmol, 1.5 equiv.) to give

compound **6b** as a colorless oil (40 mg, 45%). Eluent: ethyl acetate/petroleum ether (1:10,  $R_f = 0.5$ ).  $^1\text{H NMR}$  (400 MHz,  $\text{CDCl}_3$ )  $\delta$  7.33 – 7.12 (m, 5 H), 6.86 (t,  $J = 56.4$  Hz, 1 H), 5.73 (ddt,  $J = 16.9, 10.3, 6.7$  Hz, 1 H), 5.06 – 4.94 (m, 2 H), 3.73 – 3.60 (m, 2 H), 2.79 – 2.68 (m, 1 H), 2.66 – 2.51 (m, 2 H), 2.06 – 1.95 (m, 2 H), 1.84 – 1.73 (m, 2 H), 1.62 – 1.54 (m, 2 H);  $^{13}\text{C NMR}$  (151 MHz,  $\text{CDCl}_3$ )  $\delta$  206.79, 141.13, 137.46, 128.51, 128.32, 126.16, 119.44 (t,  $J = 274.1$  Hz), 49.59, 36.88, 33.33, 32.94, 31.27, 30.57;  $^{19}\text{F NMR}$  (376 MHz,  $\text{CDCl}_3$ )  $\delta$  -93.94 (d,  $J = 56.4$  Hz) ppm. **IR** (KBr):  $\nu_{\text{max}} = 3063, 3027, 2928, 2859, 1712, 1641, 1496, 1454, 1392, 1326, 1205, 1062, 1029, 915, 750, 700$   $\text{cm}^{-1}$ . **MS** (EI):  $m/z$  (%) 298, 201, 131, 91 (100). **HRMS**: Calcd for  $\text{C}_{16}\text{H}_{20}\text{F}_2\text{SO}$ : 298.1203; Found: 298.1205. **HPLC** (ODH,  $0.46 \times 25$  cm,  $5 \mu\text{m}$ , hexane/isopropanol = 95/5 (v/v %), flow 0.7 mL/min, UV detection at 214 nm), retention time = 10.12 min (major) and 10.64 min (minor).  $[\alpha]_{\text{D}}^{20} = -6.67$  (c = 0.120 g/100 mL,  $\text{CH}_3\text{Cl}$ ). ee = 91%.

**(S)-3-cyclopropyl-1-(difluoromethylthio)-5-phenylpentan-2-one 6c**

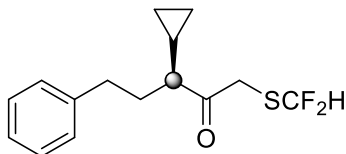

Prepared according to **GP3** using vinyl bromide (1.0 M in THF, 0.36 mL, 0.36 mmol, 1.2 equiv.),  $t\text{BuLi}$  (1.3 M in hexane, 0.55 mL, 0.72 mmol, 2.4 equiv.), (S)-2-(1-cyclopropyl-3-phenylpropyl)-4,4,5,5-tetramethyl-1,3,2-dioxaborolane (86 mg, 0.30 mmol, 1.0 equiv), reagent **2a** (100 mg, 0.45 mmol, 1.5 equiv.),  $\text{NaBO}_3$  (74 mg, 0.90 mmol, 3.0 equiv.) and Jone's reagent (3.0 N, 0.15 mL, 0.45 mmol, 1.5 equiv.) to give compound **6c** as a colorless oil (46mg, 54%). Eluent: ethyl acetate/petroleum ether (1:10,  $R_f = 0.5$ ).  $^1\text{H NMR}$  (500 MHz,  $\text{CDCl}_3$ )  $\delta$  7.32 – 7.25 (m, 2 H), 7.22 – 7.14 (m, 3 H), 6.86 (t,  $J = 56.5$  Hz, 1 H), 3.82 (d,  $J = 16.6$  Hz, 1 H), 3.72 (d,  $J = 16.6$  Hz, 1 H), 2.71 – 2.56 (m, 2 H), 2.20 – 2.09 (m, 1 H), 1.97 – 1.83 (m, 2 H), 0.88 – 0.81 (m, 1 H), 0.69 – 0.56 (m, 2 H), 0.27 (td,  $J = 9.4, 5.0$  Hz, 1 H), 0.20 (td,  $J = 9.4, 5.0$  Hz, 1 H);  $^{13}\text{C NMR}$  (126 MHz,  $\text{CDCl}_3$ )  $\delta$  205.98, 141.43, 128.45, 128.31, 126.04, 119.48 (t,  $J = 274.1$  Hz), 55.32, 36.59, 33.41, 33.19, 13.70, 4.80, 4.38;  $^{19}\text{F NMR}$  (471 MHz,  $\text{CDCl}_3$ )  $\delta$  -93.94 (d,  $J = 56.0$  Hz) ppm. **IR** (KBr):  $\nu_{\text{max}} = 3082, 3026, 2925, 2861,$

1713, 1496, 1454, 1394, 1326, 1175, 1062, 1027, 822, 751, 700  $\text{cm}^{-1}$ . **MS** (EI): m/z (%) 284, 180 (100), 159, 117, 91. **HRMS**: Calcd for  $\text{C}_{15}\text{H}_{18}\text{F}_2\text{S}$ : 284.1046; Found: 284.1051. **HPLC** (ADH,  $0.46 \times 25$  cm,  $5 \mu\text{m}$ , hexane/isopropanol = 98/2 (v/v %), flow 0.7 mL/min, UV detection at 214 nm), retention time = 9.41 min (major) and 9.82 min (minor).  $[\alpha]_{\text{D}}^{20} = 81.46$  ( $c = 0.110$  g/100 mL,  $\text{CH}_3\text{Cl}$ ). ee = 97%.

## General Procedure for Reaction of Lithium vinyl Boronate with *N*-Trifluoromethylthiosaccharin 7

### General Procedure 4a (GP4a)

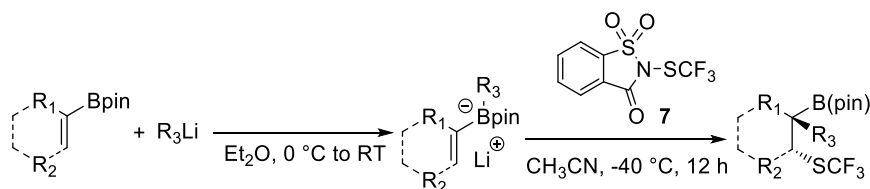

An oven-dried, 25-mL Schlenk flask equipped with a stir bar, septum, and digital thermocouple probe was charged with Et<sub>2</sub>O (2.0 mL) and vinyl pinacol boronate (47 mg, 0.30 mmol, 1.0 equiv.). The resulting solution was cooled to 0 °C and a solution of phenyl lithium in THF (195 μL, 2.0 M, 0.390 mmol, 1.30 equiv.) was added dropwise. The mixture was stirred at 0 °C for 15 min, then warmed to room temperature for additional 15 min. The solvent was carefully removed under reduced pressure, affording lithium phenyl vinyl boronate complex as a white solid, which was used directly without further purification. To the solid was added CH<sub>3</sub>CN (3.0 mL) and the mixture was cooled to -40 °C. *N*-Trifluoromethylthiosaccharin 7 (128 mg, 0.450 mmol, 1.50 equiv.) was added. This reaction was stirred at -40 °C for 12 h. The solvent was removed under reduced pressure, the residue was purified by silica gel chromatography (Eluent: ethyl acetate/petroleum ether = 1:50, R<sub>f</sub> = 0.6) to give compound **8a** as a yellow oil (76 mg, 76%).

### General Procedure 4b (GP4b)

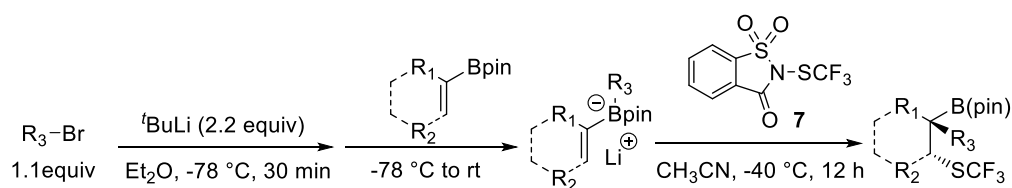

An oven-dried, 25-mL Schlenk flask equipped with a stir bar, septum, and digital thermocouple probe was charged with Et<sub>2</sub>O (2.0 mL) and 4-bromochlorobenzene (63 mg, 0.33 mmol, 1.1 equiv.). The resulting solution was cooled to -78 °C. A solution of <sup>t</sup>BuLi in hexane (0.50 mL, 1.3 M, 0.66 mmol, 2.2 equiv.) was added dropwise. The mixture was stirred at -78 °C for 30 min. A solution of pinacol vinylboronate (47 mg, 0.30 mmol, 1.0 equiv.) in Et<sub>2</sub>O (2.0 mL) was added dropwise. The mixture was stirred

at -78 °C for 15 min, then warmed to room temperature for another 15 min. The solvent was carefully removed under reduced pressure, affording the corresponding lithium phenyl vinylboronate complex as a white solid, which was used directly without further purification. To the solid was added CH<sub>3</sub>CN (3.0 mL) and cooled to -40 °C. *N*-Trifluoromethylthiosaccharin **7** (128 mg, 0.450 mmol, 1.50 equiv.) was added and the mixture was stirred for at -40 °C 12 h. The solvent was removed under reduced pressure, the residue was purified by silica gel chromatography to give compound **8b**.

#### 4,4,5,5-Tetramethyl-2-(1-phenyl-2-(trifluoromethylthio)ethyl)-1,3,2-dioxaborolane **8a**

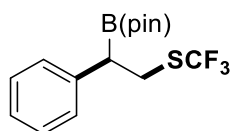

Prepared according to *GP4a* using pinacol vinyl boronate (47 mg, 0.30 mmol, 1.0 equiv.) phenyl lithium in THF (195  $\mu$ L, 2.0 M, 0.390 mmol, 1.30 equiv.) and *N*-trifluoromethylthiosaccharin **7** (128 mg, 0.450 mmol, 1.50 equiv.) to give compound **8a** as a yellow oil (76 mg, 76%). Eluent: ethyl acetate/petroleum ether (1:50,  $R_f$  = 0.6). <sup>1</sup>H NMR (400 MHz, CDCl<sub>3</sub>)  $\delta$  7.32 – 7.27 (m, 2 H), 7.20 (dd,  $J$  = 7.6, 5.8 Hz, 3 H), 3.34 (dd,  $J$  = 12.9, 8.4 Hz, 1 H), 3.21 (dd,  $J$  = 12.9, 8.6 Hz, 1 H), 2.68 (t,  $J$  = 8.5 Hz, 1 H), 1.23 (s, 6 H), 1.20 (s, 6 H); <sup>19</sup>F NMR (376 MHz, CDCl<sub>3</sub>)  $\delta$  -41.14 (s); <sup>13</sup>C NMR (101 MHz, CDCl<sub>3</sub>, signal of  $sp^3$  carbon and adjacent to boron was missing)  $\delta$  139.91, 131.26 (q,  $J$  = 306.0 Hz), 128.71, 128.34, 126.40, 84.07, 32.82, 24.62, 24.52; <sup>11</sup>B NMR (128 MHz, CDCl<sub>3</sub>)  $\delta$  32.86 (s) ppm. IR (KBr):  $\nu_{\max}$  = 2980, 1372, 1329, 1141, 1112, 966, 848, 700 cm<sup>-1</sup>. HRMS (ESI) for C<sub>15</sub>H<sub>24</sub><sup>10</sup>BF<sub>3</sub>NO<sub>2</sub>S (M+NH<sub>4</sub><sup>+</sup>): Calcd: 349.1604; Found: 349.1601.

#### 2-(1-(4-Chlorophenyl)-2-(trifluoromethylthio)ethyl)-4,4,5,5-tetramethyl-1,3,2-dioxaborolane **8b**

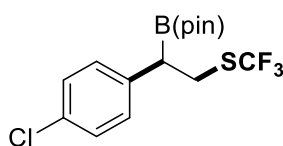

Prepared according to **GP4b** using 4-bromochlorobenzene (63 mg, 0.33 mmol, 1.1 equiv.), <sup>t</sup>BuLi in hexane (0.50 mL, 1.3 M, 0.66 mmol, 2.2 equiv.), pinacol vinyl boronate (47 mg, 0.30 mmol, 1.0 equiv.) and *N*-trifluoromethylthiosaccharin **7** (128 mg, 0.450 mmol, 1.50 equiv.) to give compound **8b** as a yellow oil (93 mg, 83%). Eluent: ethyl acetate/petroleum ether (1:50, *R<sub>f</sub>* = 0.6). <sup>1</sup>H NMR (400 MHz, CDCl<sub>3</sub>) δ 7.26 (d, *J* = 8.1 Hz, 2 H), 7.13 (d, *J* = 8.3 Hz, 2 H), 3.33 (dd, *J* = 12.9, 8.0 Hz, 1 H), 3.30 – 3.11 (m, 1 H), 2.66 (t, *J* = 8.4 Hz, 1 H), 1.23 (s, 6 H), 1.20 (s, 6 H); <sup>19</sup>F NMR (376 MHz, CDCl<sub>3</sub>) δ -41.11 (s); <sup>13</sup>C NMR (101 MHz, CDCl<sub>3</sub>, signal of *sp*<sup>3</sup> carbon and adjacent to boron was missing) δ 138.37, 132.22, 131.13 (q, *J* = 306.1 Hz), 129.67, 128.84, 84.21, 32.59, 24.60, 24.50; <sup>11</sup>B NMR (128 MHz, CDCl<sub>3</sub>) δ 32.31 (s) ppm. IR (KBr): *v*<sub>max</sub> = 2980, 2934, 1491, 1469, 1410, 1372, 1333, 1294, 1271, 1236, 1214, 1115, 1015, 966, 849, 828, 755 cm<sup>-1</sup>. MS (EI): *m/z* (%) 366, 251, 138 (100). HRMS: Calcd for C<sub>15</sub>H<sub>19</sub>F<sub>3</sub>SO<sub>2</sub><sup>10</sup>BCl: 365.0876; Found:365.0874.

**4,4,5,5-Tetramethyl-2-(1-(4-(trifluoromethyl)phenyl)-2-(trifluoromethylthio)ethyl)-1,3,2-dioxaborolane 8c**

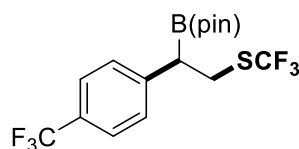

Prepared according to **GP4b** using 4-bromobenzotrifluoride (68 mg, 0.33 mmol, 1.1 equiv.), <sup>t</sup>BuLi in hexane (0.50 mL, 1.3 M, 0.66 mmol, 2.2 equiv.), pinacol vinyl boronate (47 mg, 0.30 mmol, 1.0 equiv.) and *N*-trifluoromethylthiosaccharin **7** (128 mg, 0.450 mmol, 1.50 equiv.) to give compound **8c** as a yellow oil (100 mg, 83%). Eluent: ethyl acetate/petroleum ether (1:50, *R<sub>f</sub>* = 0.6). <sup>1</sup>H NMR (400 MHz, CDCl<sub>3</sub>) δ 7.57 (d, *J* = 8.1 Hz, 2 H), 7.33 (d, *J* = 8.0 Hz, 2 H), 3.40 (dd, *J* = 13.1, 7.9 Hz, 1 H), 3.23 (dd, *J* = 13.1, 9.0 Hz, 1 H), 2.78 (t, *J* = 8.4 Hz, 1 H), 1.25 (s, 6 H), 1.22 (s, 6 H); <sup>19</sup>F NMR (376 MHz, CDCl<sub>3</sub>) δ -41.14 (s, 3 F), -62.48 (s, 3 F); <sup>13</sup>C NMR (101 MHz, CDCl<sub>3</sub>, signal of *sp*<sup>3</sup> carbon and adjacent to boron was missing) δ 144.11, 131.08 (q, *J* = 306.1 Hz), 128.73 (q, *J* = 32.4 Hz), 128.65, 125.64 (dd, *J* = 7.6, 3.8 Hz), 84.38, 32.34, 24.60, 24.51; <sup>11</sup>B NMR (128 MHz, CDCl<sub>3</sub>) δ 32.21 (s) ppm. IR (KBr): *v*<sub>max</sub> = 2981, 2935, 1618, 1373, 1325, 1272, 1237, 1214, 1113, 1069, 1018, 966, 850, 756

cm<sup>-1</sup>. **MS** (DART): 418 (M+NH<sub>4</sub><sup>+</sup>). **HRMS** (DART) for C<sub>16</sub>H<sub>23</sub><sup>10</sup>BF<sub>6</sub>O<sub>2</sub>NS (M+NH<sub>4</sub><sup>+</sup>): Calcd: 417.1478; Found: 417.1474.

**4,4,5,5-Tetramethyl-2-(1-(3-((2-methyl-1,3-dioxolan-2-yl)methyl)phenyl)-2-(trifluoromethylthio)ethyl)-1,3,2-dioxaborolane 8d**

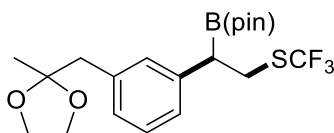

Prepared according to **GP4b** using 2-(3-bromobenzyl)-2-methyl-1,3-dioxolane (85 mg, 0.33 mmol, 1.1 equiv.), <sup>t</sup>BuLi in hexane (0.50 mL, 1.3 M, 0.66 mmol, 2.2 equiv.), pinacol vinyl boronate (47 mg, 0.30 mmol, 1.0 equiv.) and *N*-trifluoromethylthiosaccharin **7** (128 mg, 0.450 mmol, 1.50 equiv.) to give compound **8d** as a yellow oil (100 mg, 77%). Eluent: ethyl acetate/petroleum ether (1:10, R<sub>f</sub> = 0.5). <sup>1</sup>H NMR (400 MHz, CDCl<sub>3</sub>) δ 7.20 (t, *J* = 7.4 Hz, 1 H), 7.12 (d, *J* = 8.0 Hz, 2 H), 7.06 (d, *J* = 7.5 Hz, 1 H), 3.86 (d, *J* = 10.0 Hz, 2 H), 3.80 – 3.63 (m, 2 H), 3.35 (dd, *J* = 12.7, 8.1 Hz, 1 H), 3.22 (dd, *J* = 12.6, 9.1 Hz, 1 H), 2.89 (s, 2 H), 2.66 (t, *J* = 8.4 Hz, 1 H), 1.30 (s, 3 H), 1.23 (s, 6 H), 1.19 (s, 6 H); <sup>19</sup>F NMR (376 MHz, CDCl<sub>3</sub>) δ -41.13 (s); <sup>13</sup>C NMR (101 MHz, CDCl<sub>3</sub>, signal of *sp*<sup>3</sup> carbon and adjacent to boron was missing) δ 139.35, 137.29, 131.26 (q, *J* = 305.8 Hz), 130.54, 128.66, 128.24, 126.43, 109.66, 83.98, 64.84, 64.82, 45.34, 32.86, 24.62, 24.50; <sup>11</sup>B NMR (128 MHz, CDCl<sub>3</sub>) δ 32.99 (s) ppm. **IR** (KBr): ν<sub>max</sub> = 2980, 2934, 2883, 1443, 1372, 1332, 1270, 1214, 1114, 1049, 969, 848, 833, 709 cm<sup>-1</sup>. **HRMS** (ESI) for C<sub>20</sub>H<sub>29</sub><sup>10</sup>BF<sub>3</sub>O<sub>4</sub>S (M+H<sup>+</sup>): Calcd: 432.1863; Found: 432.1863.

**2-(1-(Benzo[d][1,3]dioxol-5-yl)-2-(trifluoromethylthio)ethyl)-4,4,5,5-tetramethyl-1,3,2-dioxaborolane 8e**

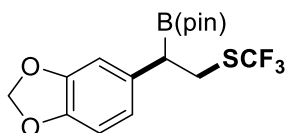

Prepared according to **GP4b** using 4-bromo-1,2-(methylenedioxy)benzene (67 mg, 0.33 mmol, 1.1 equiv.), <sup>t</sup>BuLi in hexane (0.50 mL, 1.3 M, 0.66 mmol, 2.2 equiv.), pinacol vinyl boronate (47 mg, 0.30 mmol, 1.0 equiv.) and



*N*-trifluoromethylthiosaccharin **7** (128 mg, 0.450 mmol, 1.50 equiv.) to give compound **8e** as a yellow oil (87 mg, 77%). Eluent: ethyl acetate/petroleum ether (1:10,  $R_f = 0.5$ ).  $^1\text{H NMR}$  (400 MHz,  $\text{CDCl}_3$ )  $\delta$  6.79 – 6.69 (m, 2 H), 6.65 (d,  $J = 7.9$  Hz, 1 H), 5.93 (s, 2 H), 3.28 (dd,  $J = 12.8, 8.1$  Hz, 1 H), 3.15 (dd,  $J = 12.8, 9.0$  Hz, 1 H), 2.59 (t,  $J = 8.4$  Hz, 1 H), 1.24 (s, 6 H), 1.21 (s, 6 H);  $^{19}\text{F NMR}$  (376 MHz,  $\text{CDCl}_3$ )  $\delta$  -41.11 (s);  $^{13}\text{C NMR}$  (101 MHz,  $\text{CDCl}_3$ )  $\delta$  147.85, 146.15, 133.58, 131.25 (d,  $J = 306.0$  Hz), 121.45, 108.75, 108.48, 100.91, 84.09, 33.18, 24.63, 24.54;  $^{11}\text{B NMR}$  (128 MHz,  $\text{CDCl}_3$ )  $\delta$  32.62 (s) ppm. **IR** (KBr):  $\nu_{\text{max}} = 2978, 2932, 1489, 1436, 1372, 1247, 1116, 1041, 967, 935, 854, 811, 756, 673$   $\text{cm}^{-1}$ . **MS** (DART): 394 ( $\text{M}+\text{NH}_4^+$ ). **HRMS** (DART) for  $\text{C}_{16}\text{H}_{24}^{10}\text{BF}_3\text{O}_4\text{NS}$  ( $\text{M}+\text{NH}_4^+$ ): Calcd: 393.1502; Found: 393.1496.

**4,4,5,5-Tetramethyl-2-(1-(naphthalen-2-yl)-2-(trifluoromethylthio)ethyl)-1,3,2-dioxaborolane **8f****

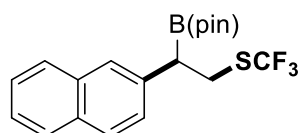

Prepared according to **GP4b** using 2-bromonaphthalene (68 mg, 0.33 mmol, 1.1 equiv.),  $t\text{BuLi}$  in hexane (0.50 mL, 1.3 M, 0.66 mmol, 2.2 equiv.), pinacol vinyl boronate (47 mg, 0.30 mmol, 1.0 equiv.) and *N*-trifluoromethylthiosaccharin **7** (128 mg, 0.450 mmol, 1.50 equiv.) to give compound **8f** as a yellow oil (98 mg, 85%). Eluent: ethyl acetate/petroleum ether (1:50,  $R_f = 0.5$ ).  $^1\text{H NMR}$  (400 MHz,  $\text{CDCl}_3$ )  $\delta$  7.86 – 7.77 (m, 3 H), 7.64 (s, 1 H), 7.54 – 7.29 (m, 3 H), 3.43 (d,  $J = 8.1$  Hz, 1 H), 3.39 – 3.24 (m, 1 H), 2.86 (s, 1 H), 1.23 (s, 6 H), 1.19 (s, 6 H);  $^{13}\text{C NMR}$  (101 MHz,  $\text{CDCl}_3$ , signal of  $sp^3$  carbon and adjacent to boron was missing)  $\delta$  137.36, 133.68, 132.20, 131.26 (d,  $J = 306.0$  Hz), 130.39, 128.38, 127.60, 126.79, 126.60, 126.05, 125.47, 84.15, 32.61, 24.63, 24.54;  $^{19}\text{F NMR}$  (376 MHz,  $\text{CDCl}_3$ )  $\delta$  -41.06 (s);  $^{11}\text{B NMR}$  (128 MHz,  $\text{CDCl}_3$ )  $\delta$  33.09 (s) ppm. **IR** (KBr):  $\nu_{\text{max}} = 2978, 2931, 1477, 1439, 1381, 1372, 1333, 1271, 1326, 1213, 1141, 1112, 967, 855, 819, 746, 687$   $\text{cm}^{-1}$ . **MS** (DART): 400 ( $\text{M}+\text{NH}_4^+$ ). **HRMS** (DART) for  $\text{C}_{19}\text{H}_{26}^{10}\text{BF}_3\text{O}_2\text{NS}$  ( $\text{M}+\text{NH}_4^+$ ): Calcd: 399.1760; Found: 399.1754.

**2-(1-(Benzofuran-5-yl)-2-(trifluoromethylthio)ethyl)-4,4,5,5-tetramethyl-1,3,2-dioxaborolane**

### xaborolane 8g

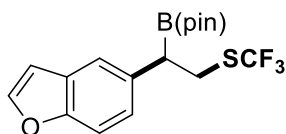

Prepared according to **GP4b** using 5-bromo-1-benzofuran (65 mg, 0.33 mmol, 1.1 equiv.), <sup>t</sup>BuLi in hexane (0.50 mL, 1.3 M, 0.66 mmol, 2.2 equiv.), pinacol vinyl boronate (47 mg, 0.30 mmol, 1.0 equiv.) and *N*-trifluoromethylthiosaccharin **7** (128 mg, 0.450 mmol, 1.50 equiv.) to give compound **8g** as a yellow oil (92 mg, 82%). Eluent: ethyl acetate/petroleum ether (1:20, *R<sub>f</sub>* = 0.5). **<sup>1</sup>H NMR** (400 MHz, CDCl<sub>3</sub>) δ 7.58 (s, 1 H), 7.42 (dd, *J* = 4.7, 3.0 Hz, 2 H), 7.13 (d, *J* = 8.6 Hz, 1 H), 6.71 (d, *J* = 2.0 Hz, 1 H), 3.38 (dd, *J* = 12.8, 8.2 Hz, 1 H), 3.24 (dd, *J* = 12.8, 8.8 Hz, 1 H), 2.77 (t, *J* = 8.4 Hz, 1 H), 1.24 (s, 6 H), 1.20 (s, 6 H); **<sup>19</sup>F NMR** (376 MHz, CDCl<sub>3</sub>) δ -41.07 (s); **<sup>13</sup>C NMR** (101 MHz, CDCl<sub>3</sub>, signal of *sp*<sup>3</sup> carbon and adjacent to boron was missing) δ 153.84, 145.23, 134.35, 131.30 (q, *J* = 306.0 Hz), 127.87, 124.63, 120.77, 111.50, 106.50, 84.06, 33.36 (q, *J* = 1.2 Hz), 24.61, 24.52; **<sup>11</sup>B NMR** (128 MHz, CDCl<sub>3</sub>) δ 32.97 (s) ppm. **IR** (KBr): *v*<sub>max</sub> = 2979, 2933, 1536, 1467, 1445, 1372, 1329, 1263, 1214, 1111, 1032, 968, 883, 849, 813, 768, 755, 741, 698, 671, 642 cm<sup>-1</sup>. **MS** (ESI): 373 (M+H<sup>+</sup>). **HRMS** (ESI) for C<sub>17</sub>H<sub>21</sub><sup>10</sup>BF<sub>3</sub>O<sub>3</sub>NS (M+NH<sub>4</sub><sup>+</sup>): Calcd: 372.1287; Found: 372.1284.

### 2-(1-(Benzo[b]thiophen-5-yl)-2-(trifluoromethylthio)ethyl)-4,4,5,5-tetramethyl-1,3,2-dioxaborolane 8h

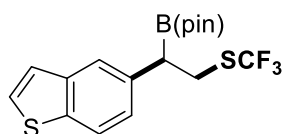

Prepared according to **GP4b** using 5-bromothianaphthene (70 mg, 0.33 mmol, 1.1 equiv.), <sup>t</sup>BuLi in hexane (0.50 mL, 1.3 M, 0.66 mmol, 2.2 equiv.), pinacol vinyl boronate (47 mg, 0.30 mmol, 1.0 equiv.) and *N*-trifluoromethylthiosaccharin **7** (128 mg, 0.450 mmol, 1.50 equiv.) to give compound **8h** as a yellow oil (102 mg, 88%). Eluent: ethyl acetate/petroleum ether (1:20, *R<sub>f</sub>* = 0.5). **<sup>1</sup>H NMR** (400 MHz, CDCl<sub>3</sub>) δ 7.79 (d, *J* = 8.3 Hz, 1 H), 7.65 (s, 1 H), 7.41 (d, *J* = 5.4 Hz, 1 H), 7.27 (d, *J* = 5.4 Hz,

1 H), 7.19 (dd,  $J = 8.3, 1.3$  Hz, 1 H), 3.41 (dd,  $J = 12.9, 8.2$  Hz, 1 H), 3.27 (dd,  $J = 12.9, 8.8$  Hz, 1 H), 2.80 (t,  $J = 8.5$  Hz, 1 H), 1.23 (s, 6 H), 1.19 (s, 6 H);  $^{19}\text{F}$  NMR (376 MHz,  $\text{CDCl}_3$ )  $\delta$  -41.05 (s);  $^{13}\text{C}$  NMR (101 MHz,  $\text{CDCl}_3$ , signal of  $sp^3$  carbon and adjacent to boron was missing)  $\delta$  140.16, 137.93, 136.02, 131.28 (q,  $J = 306.0$  Hz), 126.72, 124.82, 123.72, 123.21, 122.70, 84.12, 33.07, 24.61, 24.53;  $^{11}\text{B}$  NMR (128 MHz,  $\text{CDCl}_3$ )  $\delta$  33.06 (s) ppm. IR (KBr):  $\nu_{\text{max}} = 2978, 1597, 1437, 1328, 1144, 1112, 1051, 897, 812, 755, 700$   $\text{cm}^{-1}$ . MS (DART): 406 ( $\text{M}+\text{NH}_4^+$ ). HRMS (DART) for  $\text{C}_{17}\text{H}_{24}^{10}\text{BF}_3\text{O}_2\text{NS}_2$  ( $\text{M}+\text{NH}_4^+$ ): Calcd: 405.1324; Found: 405.1319.

**(±)-2-((1*R*,2*R*)-1-(benzo[*b*]thiophen-5-yl)-5-phenyl-2-(trifluoromethylthio)pentyl)-4,4,5,5-tetramethyl-1,3,2-dioxaborolane **8i****

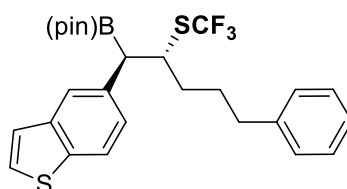

Prepared according to **GP4b** using 5-bromothianaphthene (70 mg, 0.33 mmol, 1.1 equiv.),  $t\text{BuLi}$  in hexane (0.50 mL, 1.3 M, 0.66 mmol, 2.2 equiv.), pinacol vinyl boronate (47 mg, 0.30 mmol, 1.0 equiv.) and *N*-trifluoromethylthiosaccharin **7** (128 mg, 0.450 mmol, 1.50 equiv.) to give compound **8i** as a yellow oil (97 mg, 72%). Eluent: ethyl acetate/petroleum ether (1:20,  $R_f = 0.5$ ).  $^1\text{H}$  NMR (400 MHz,  $\text{CDCl}_3$ )  $\delta$  7.77 (d,  $J = 8.3$  Hz, 1 H), 7.67 (s, 1 H), 7.42 (d,  $J = 5.4$  Hz, 1 H), 7.28 (d,  $J = 5.4$  Hz, 1 H), 7.25 – 7.20 (m, 1 H), 7.15 (t,  $J = 7.2$  Hz, 2 H), 7.10 (d,  $J = 7.0$  Hz, 1 H), 7.01 (d,  $J = 7.0$  Hz, 2 H), 3.75 (ddd,  $J = 11.0, 7.6, 3.5$  Hz, 1 H), 2.75 (d,  $J = 10.9$  Hz, 1 H), 2.51 (ddd,  $J = 14.6, 8.7, 6.2$  Hz, 1 H), 2.46 – 2.34 (m, 1 H), 1.83 – 1.61 (m, 3 H), 1.49 (dt,  $J = 14.3, 8.4$  Hz, 1 H), 1.20 (s, 6 H), 1.17 (s, 6 H);  $^{19}\text{F}$  NMR (376 MHz,  $\text{CDCl}_3$ , signal of  $sp^3$  carbon and adjacent to boron was missing)  $\delta$  -38.51 (s);  $^{13}\text{C}$  NMR (101 MHz,  $\text{CDCl}_3$ )  $\delta$  141.87, 140.02, 137.89, 134.91, 131.12 (q,  $J = 306.8$  Hz), 128.20, 128.15, 126.52, 125.79, 125.65, 124.21, 123.81, 122.42, 83.94, 49.09, 35.19, 33.10, 26.87, 24.62, 24.42;  $^{11}\text{B}$  NMR (128 MHz,  $\text{CDCl}_3$ )  $\delta$  32.57 (s) ppm. IR (KBr):  $\nu_{\text{max}} = 2978, 2933, 1438, 1421, 1361, 1271, 1214, 1143, 1112, 1051, 968, 848, 754, 733, 712, 698$   $\text{cm}^{-1}$ . MS (ESI): 524 ( $\text{M}+\text{NH}_4^+$ ). HRMS (ESI) for  $\text{C}_{26}\text{H}_{34}^{10}\text{BF}_3\text{O}_2\text{NS}_2$  ( $\text{M}+\text{NH}_4^+$ ):

Calcd: 523.2107; Found: 523.2103.

## Preparation of difluoromethylthiolated derivative of PF-4191834 by Consecutive Cross-Coupling

### 5-(4-(3-Bromophenylthio)phenyl)-1-methyl-1*H*-pyrazole **11**<sup>[2]</sup>

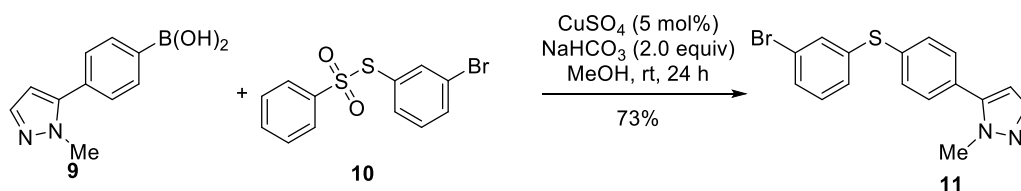

Aryl boronic acids **9** (0.49 g, 2.4 mmol, 1.2 equiv),  $\text{CuSO}_4$  (16 mg, 0.10 mmol, 5.0 mol%),  $\text{NaHCO}_3$  (0.25 g, 3.0 mmol, 1.5 equiv.) were placed into an oven-dried Schlenk tube that was equipped with a stirring bar under an atmosphere of argon. 15 mL of Absolute methanol and S-3-bromophenyl benzenesulfonothioate **10** (0.66 g, 2.0 mmol, 1.0 equiv.) was added. The mixture was stirred at room temperature for 24 h. The solvent was removed under reduced pressure, the residue was purified by silica gel chromatography (Eluent: ethyl acetate/petroleum ether = 1:5,  $R_f = 0.3$ ) to give compound **11** as a colorless oil (504 mg, 73%). <sup>1</sup>H NMR (400 MHz,  $\text{CDCl}_3$ )  $\delta$  7.54 – 7.50 (m, 2 H), 7.42 – 7.36 (m, 5 H), 7.31 (d,  $J = 7.9$  Hz, 1 H), 7.20 (t,  $J = 7.9$  Hz, 1 H), 6.32 (d,  $J = 1.8$  Hz, 1 H), 3.90 (s, 3 H); <sup>13</sup>C NMR (101 MHz,  $\text{CDCl}_3$ )  $\delta$  142.54, 138.54, 137.40, 135.48, 133.54, 131.02, 130.54, 130.40, 129.73, 129.63, 129.43, 123.04, 106.14, 37.51 ppm. IR (KBr):  $\nu_{\text{max}} = 3051, 2945, 1602, 1573, 1558, 1481, 1458, 1422, 1396, 1334, 1274, 1251, 1177, 1091, 1081, 1067, 1015, 992, 978, 927, 871, 835, 777, 751, 702, 679, 647$   $\text{cm}^{-1}$ . HRMS: Calcd for  $\text{C}_{16}\text{H}_{13}\text{N}_2\text{SBr}$ : 343.9983; Found: 343.9989.

### (±)-5-(4-(3-((3*R*,4*R*)-3-(difluoromethylthio)-4-(4,4,5,5-tetramethyl-1,3,2-dioxaborolan-2-yl)tetrahydro-2*H*-pyran-4-yl)phenylthio)phenyl)-1-methyl-1*H*-pyrazole **12**

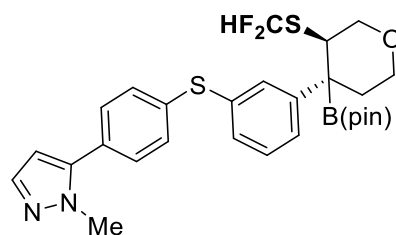

Prepared according to **GP1b** using 5-(4-(3-bromophenylthio)phenyl)-1-methyl-1*H*-pyrazole **11** (114 mg, 0.33 mmol, 1.1 equiv.) <sup>t</sup>BuLi (1.3 M in hexane,

0.50 mL, 0.66 mmol, 2.2 equiv.), 3,6-dihydro-2*H*-pyran-4-boronic acid pinacol ester (63 mg, 0.30 mmol, 1.0 equiv.) and reagent **2a** (100 mg, 0.450 mmol, 1.50 equiv.) to give compound **12** as a yellow oil (195 mg, 70%). Eluent: ethyl acetate/petroleum ether (1:5,  $R_f = 0.2$ ).  $^1\text{H NMR}$  (300 MHz,  $\text{CDCl}_3$ )  $\delta$  7.91 (s, 1 H), 7.79 (d,  $J = 7.4$  Hz, 1 H), 7.48 (d,  $J = 6.8$  Hz, 2 H), 7.38 – 7.27 (m, 5 H), 6.49 (t,  $J = 56.3$  Hz, 1 H), 6.28 (d,  $J = 1.7$  Hz, 1 H), 4.50 (d,  $J = 11.3$  Hz, 1 H), 4.01 (t,  $J = 10.5$  Hz, 1 H), 3.88 (s, 3 H), 3.66 (t,  $J = 11.0$  Hz, 2 H), 3.32 (s, 1 H), 2.48 – 2.33 (m, 1 H), 1.66 (d,  $J = 13.6$  Hz, 1 H), 1.47 (s, 3 H), 1.31 (s, 3 H), 1.28 (s, 3 H), 1.18 (s, 3 H);  $^{19}\text{F NMR}$  (376 MHz,  $\text{CDCl}_3$ )  $\delta$  -91.82 (dd,  $J = 240.3, 56.0$  Hz), -93.19 (dd,  $J = 240.3, 56.6$  Hz);  $^{13}\text{C NMR}$  (101 MHz,  $\text{CDCl}_3$ , signal of  $sp^3$  carbon and  $sp^2$  carbon adjacent to boron was missing)  $\delta$  142.76, 138.42, 138.02, 137.68, 133.75, 133.35, 132.95, 129.65, 129.13, 128.65, 128.45, 119.94 (t,  $J = 274$  Hz), 105.95, 80.21, 77.17, 68.62, 62.24, 43.40, 37.39, 31.96, 26.17, 24.98, 24.90, 23.06;  $^{11}\text{B NMR}$  (128 MHz,  $\text{CDCl}_3$ )  $\delta$  45.39 (s) ppm. IR (KBr):  $\nu_{\text{max}} = 2977, 1722, 1586, 1477, 1401, 1372, 1353, 1325, 1271, 1223, 1142, 1113, 1089, 1067, 1026, 979, 963, 911, 862, 851, 837, 780, 732, 703$   $\text{cm}^{-1}$ . MS (ESI): 559 ( $\text{M}+\text{H}^+$ ). HRMS (ESI) for  $\text{C}_{28}\text{H}_{34}^{10}\text{BF}_2\text{N}_2\text{O}_3\text{S}_2$  ( $\text{M}+\text{H}^+$ ): Calcd: 558.2103; Found: 558.2096.

### 3-(Difluoromethylthio)dihydro-2*H*-pyran-4(3*H*)-one **13**

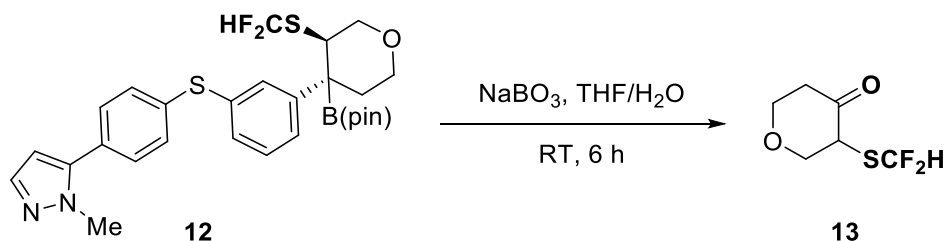

An 25-mL Schlenk flask equipped with a stir bar, septum, and digital thermocouple probe was charged with **12** (55.7 mg, 0.100 mmol),  $\text{NaBO}_3$  (24.5 mg, 0.300 mmol, 3.00 equiv.) and THF/ $\text{H}_2\text{O}$  (v/v = 1:1, 3.0 mL) was added. The reaction was allowed to stir at room temperature for 6 h. Half of the solvent was removed under reduced pressure. The aqueous layer was extracted with ethyl acetate (5 mL  $\times$  3), and the combined organic layers were dried over magnesium sulfate, filtered, and concentrated. The residue was purified by silica gel chromatography (Eluent: ethyl acetate/petroleum ether = 1:5,  $R_f = 0.5$ ) to give compound **13** as a yellow oil (15.5 mg, 85%).  $^1\text{H NMR}$  (400 MHz,  $\text{CDCl}_3$ )  $\delta$  6.90 (t,  $J = 56.1$  Hz, 1 H), 4.40 (dd,  $J = 11.6,$

5.7 Hz, 1 H), 4.26 – 4.13 (m, 1 H), 4.14 – 4.05 (m, 1 H), 3.87 (ddd,  $J = 11.5, 9.4, 4.1$  Hz, 1 H), 3.78 (dd,  $J = 11.6, 8.8$  Hz, 1 H), 2.80 (dt,  $J = 14.4, 4.2$  Hz, 1 H), 2.76 – 2.62 (m, 1 H);  $^{13}\text{C}$  NMR (126 MHz,  $\text{CDCl}_3$ )  $\delta$  201.24, 119.38 (dd,  $J = 275.6, 273.8$  Hz), 73.38, 68.40, 50.41, 41.95;  $^{19}\text{F}$  NMR (376 MHz,  $\text{CDCl}_3$ )  $\delta$  -90.34 (dd,  $J = 242.3, 55.7$  Hz), -92.80 (dd,  $J = 242.3, 56.4$  Hz). IR (KBr):  $\nu_{\text{max}} = 2976, 2920, 2864, 1715, 1473, 1416, 1316, 1222, 113, 863, 776$   $\text{cm}^{-1}$ . MS (EI):  $m/z$  (%) 182, 124, 110 (100), 88. HRMS: Calcd for  $\text{C}_6\text{H}_8\text{F}_2\text{SO}_2$ : 182.0208; Found: 182.0207.

## References

1. R. Larouche-Gauthier, T. G. Elford and V.K. Aggarwal, *J. Am. Chem. Soc.*, 2011, **133**, 16794.
2. S. Yoshida, Y. Sugimura, Y. Hazama, Y. Nishiyama, T. Yano, S. Shimizu, T. Hosoya, *Chem. Commun.* 2015, **51**, 16613.

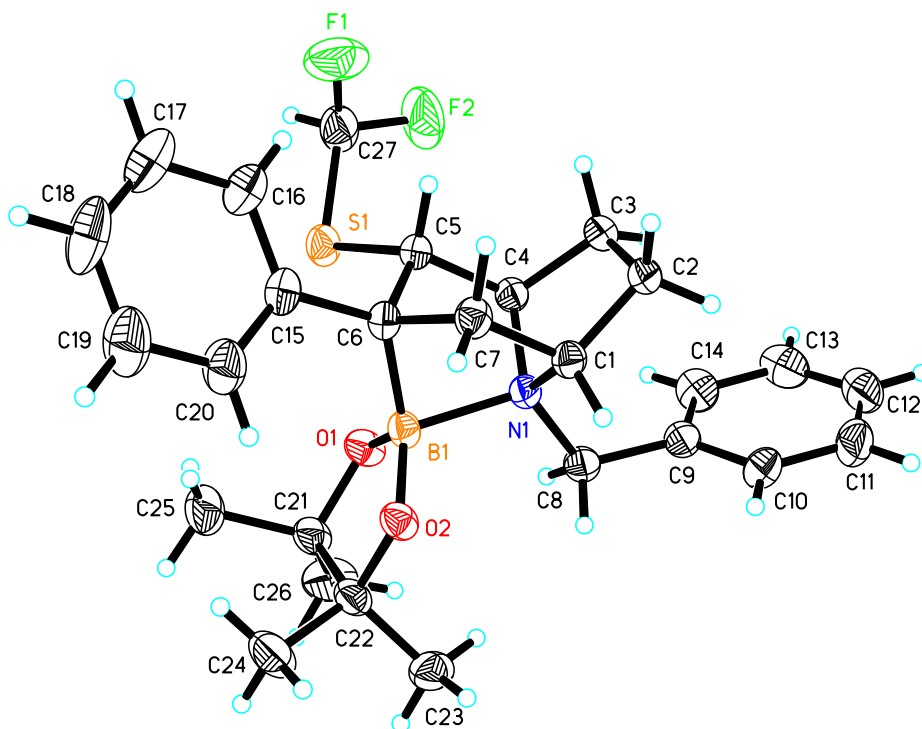

**Figure S1. X-ray Structure of 3s**



**Table S1.** Crystal data and structure refinement for mo\_d8v18370\_0m.

|                                   |                                                                     |                                |
|-----------------------------------|---------------------------------------------------------------------|--------------------------------|
| Identification code               | mo_d8v18370_0m                                                      |                                |
| Empirical formula                 | C <sub>27</sub> H <sub>34</sub> B F <sub>2</sub> N O <sub>2</sub> S |                                |
| Formula weight                    | 485.42                                                              |                                |
| Temperature                       | 296(2) K                                                            |                                |
| Wavelength                        | 0.71073 Å                                                           |                                |
| Crystal system                    | Monoclinic                                                          |                                |
| Space group                       | C 2/c                                                               |                                |
| Unit cell dimensions              | a = 29.1214(7) Å                                                    | $\alpha = 90^\circ$ .          |
|                                   | b = 10.5552(2) Å.                                                   | $\beta = 104.0720(10)^\circ$ . |
|                                   | c = 17.3216(4) Å                                                    | $\gamma = 90^\circ$ .          |
| Volume                            | 5164.6(2) Å <sup>3</sup>                                            |                                |
| Z                                 | 8                                                                   |                                |
| Density (calculated)              | 1.249 Mg/m <sup>3</sup>                                             |                                |
| Absorption coefficient            | 0.164 mm <sup>-1</sup>                                              |                                |
| F(000)                            | 2064                                                                |                                |
| Crystal size                      | 0.20 x 0.16 x 0.11 mm <sup>3</sup>                                  |                                |
| Theta range for data collection   | 2.477 to 25.994°.                                                   |                                |
| Index ranges                      | -35 ≤ h ≤ 35, -13 ≤ k ≤ 13, -21 ≤ l ≤ 21                            |                                |
| Reflections collected             | 37446                                                               |                                |
| Independent reflections           | 5055 [R(int) = 0.0692]                                              |                                |
| Completeness to theta = 25.242°   | 99.7 %                                                              |                                |
| Absorption correction             | Semi-empirical from equivalents                                     |                                |
| Max. and min. transmission        | 0.7456 and 0.5651                                                   |                                |
| Refinement method                 | Full-matrix least-squares on F <sup>2</sup>                         |                                |
| Data / restraints / parameters    | 5055 / 0 / 312                                                      |                                |
| Goodness-of-fit on F <sup>2</sup> | 1.030                                                               |                                |
| Final R indices [I > 2σ(I)]       | R1 = 0.0460, wR2 = 0.1292                                           |                                |
| R indices (all data)              | R1 = 0.0631, wR2 = 0.1459                                           |                                |
| Extinction coefficient            | 0.0034(6)                                                           |                                |
| Largest diff. peak and hole       | 0.243 and -0.208 e.Å <sup>-3</sup>                                  |                                |

**Table S2.** Atomic coordinates ( $\times 10^4$ ) and equivalent isotropic displacement parameters ( $\text{\AA}^2 \times 10^3$ ) for mo\_d8v18370\_0m. U(eq) is defined as one third of the trace of the orthogonalized  $U^j$  tensor.

|       | x       | y       | z       | U(eq)  |
|-------|---------|---------|---------|--------|
| S(1)  | 4484(1) | 5258(1) | 5459(1) | 54(1)  |
| F(1)  | 4500(1) | 7118(2) | 4466(1) | 114(1) |
| F(2)  | 4443(1) | 7700(2) | 5622(2) | 128(1) |
| N(1)  | 3264(1) | 4439(1) | 5624(1) | 37(1)  |
| O(1)  | 4021(1) | 3186(1) | 6109(1) | 48(1)  |
| O(2)  | 3401(1) | 2022(1) | 5357(1) | 43(1)  |
| B(1)  | 3630(1) | 3225(2) | 5435(1) | 40(1)  |
| C(1)  | 2881(1) | 4550(2) | 4871(1) | 41(1)  |
| C(2)  | 2733(1) | 5943(2) | 4816(1) | 48(1)  |
| C(3)  | 3179(1) | 6656(2) | 5257(1) | 48(1)  |
| C(4)  | 3544(1) | 5624(2) | 5580(1) | 40(1)  |
| C(5)  | 3848(1) | 5290(2) | 4987(1) | 41(1)  |
| C(6)  | 3668(1) | 3993(2) | 4632(1) | 40(1)  |
| C(7)  | 3136(1) | 4165(2) | 4222(1) | 44(1)  |
| C(8)  | 3102(1) | 4255(2) | 6370(1) | 48(1)  |
| C(9)  | 2787(1) | 5250(2) | 6597(1) | 48(1)  |
| C(10) | 2300(1) | 5121(2) | 6368(1) | 59(1)  |
| C(11) | 2007(1) | 6048(3) | 6551(2) | 75(1)  |
| C(12) | 2197(1) | 7108(3) | 6958(2) | 79(1)  |
| C(13) | 2679(1) | 7234(2) | 7209(1) | 75(1)  |
| C(14) | 2974(1) | 6308(2) | 7036(1) | 61(1)  |
| C(15) | 3917(1) | 3464(2) | 4028(1) | 49(1)  |
| C(16) | 4134(1) | 4233(3) | 3570(1) | 66(1)  |
| C(17) | 4333(1) | 3728(3) | 2985(2) | 86(1)  |
| C(18) | 4320(1) | 2464(4) | 2849(2) | 99(1)  |
| C(19) | 4102(1) | 1682(3) | 3289(2) | 93(1)  |
| C(20) | 3902(1) | 2183(2) | 3867(1) | 67(1)  |
| C(21) | 4126(1) | 1902(2) | 6345(1) | 51(1)  |
| C(22) | 3651(1) | 1177(2) | 5977(1) | 49(1)  |
| C(23) | 3345(1) | 958(2)  | 6563(1) | 63(1)  |
| C(24) | 3713(1) | -84(2)  | 5594(2) | 74(1)  |
| C(25) | 4538(1) | 1488(2) | 6000(2) | 83(1)  |
| C(26) | 4281(1) | 1875(3) | 7246(2) | 82(1)  |

C(27)

4644(1)

6808(2)

5245(2)

74(1)

---

**Table S3.** Bond lengths [Å] and angles [°] for mo\_d8v18370\_0m.

---

|             |            |
|-------------|------------|
| S(1)-C(27)  | 1.764(2)   |
| S(1)-C(5)   | 1.8337(17) |
| F(1)-C(27)  | 1.354(3)   |
| F(2)-C(27)  | 1.356(3)   |
| N(1)-C(8)   | 1.492(2)   |
| N(1)-C(1)   | 1.500(2)   |
| N(1)-C(4)   | 1.507(2)   |
| N(1)-B(1)   | 1.748(2)   |
| O(1)-B(1)   | 1.420(2)   |
| O(1)-C(21)  | 1.427(2)   |
| O(2)-B(1)   | 1.425(2)   |
| O(2)-C(22)  | 1.449(2)   |
| B(1)-C(6)   | 1.636(3)   |
| C(1)-C(2)   | 1.529(2)   |
| C(1)-C(7)   | 1.545(2)   |
| C(1)-H(1)   | 0.9800     |
| C(2)-C(3)   | 1.535(3)   |
| C(2)-H(2A)  | 0.9700     |
| C(2)-H(2B)  | 0.9700     |
| C(3)-C(4)   | 1.529(2)   |
| C(3)-H(3A)  | 0.9700     |
| C(3)-H(3B)  | 0.9700     |
| C(4)-C(5)   | 1.551(2)   |
| C(4)-H(4)   | 0.9800     |
| C(5)-C(6)   | 1.541(2)   |
| C(5)-H(5)   | 0.9800     |
| C(6)-C(15)  | 1.518(2)   |
| C(6)-C(7)   | 1.549(2)   |
| C(7)-H(7A)  | 0.9700     |
| C(7)-H(7B)  | 0.9700     |
| C(8)-C(9)   | 1.509(3)   |
| C(8)-H(8A)  | 0.9700     |
| C(8)-H(8B)  | 0.9700     |
| C(9)-C(10)  | 1.383(3)   |
| C(9)-C(14)  | 1.386(3)   |
| C(10)-C(11) | 1.383(3)   |

|              |          |
|--------------|----------|
| C(10)-H(10)  | 0.9300   |
| C(11)-C(12)  | 1.366(4) |
| C(11)-H(11)  | 0.9300   |
| C(12)-C(13)  | 1.373(4) |
| C(12)-H(12)  | 0.9300   |
| C(13)-C(14)  | 1.380(3) |
| C(13)-H(13)  | 0.9300   |
| C(14)-H(14)  | 0.9300   |
| C(15)-C(20)  | 1.380(3) |
| C(15)-C(16)  | 1.390(3) |
| C(16)-C(17)  | 1.390(3) |
| C(16)-H(16)  | 0.9300   |
| C(17)-C(18)  | 1.354(5) |
| C(17)-H(17)  | 0.9300   |
| C(18)-C(19)  | 1.378(5) |
| C(18)-H(18)  | 0.9300   |
| C(19)-C(20)  | 1.380(3) |
| C(19)-H(19)  | 0.9300   |
| C(20)-H(20)  | 0.9300   |
| C(21)-C(26)  | 1.515(3) |
| C(21)-C(25)  | 1.531(3) |
| C(21)-C(22)  | 1.574(3) |
| C(22)-C(24)  | 1.517(3) |
| C(22)-C(23)  | 1.522(3) |
| C(23)-H(23A) | 0.9600   |
| C(23)-H(23B) | 0.9600   |
| C(23)-H(23C) | 0.9600   |
| C(24)-H(24A) | 0.9600   |
| C(24)-H(24B) | 0.9600   |
| C(24)-H(24C) | 0.9600   |
| C(25)-H(25A) | 0.9600   |
| C(25)-H(25B) | 0.9600   |
| C(25)-H(25C) | 0.9600   |
| C(26)-H(26A) | 0.9600   |
| C(26)-H(26B) | 0.9600   |
| C(26)-H(26C) | 0.9600   |
| C(27)-H(27)  | 0.9800   |

|                  |            |
|------------------|------------|
| C(27)-S(1)-C(5)  | 100.28(11) |
| C(8)-N(1)-C(1)   | 116.04(14) |
| C(8)-N(1)-C(4)   | 116.19(14) |
| C(1)-N(1)-C(4)   | 100.84(12) |
| C(8)-N(1)-B(1)   | 113.76(13) |
| C(1)-N(1)-B(1)   | 104.62(12) |
| C(4)-N(1)-B(1)   | 103.66(12) |
| B(1)-O(1)-C(21)  | 109.58(14) |
| B(1)-O(2)-C(22)  | 109.85(13) |
| O(1)-B(1)-O(2)   | 108.43(15) |
| O(1)-B(1)-C(6)   | 120.42(15) |
| O(2)-B(1)-C(6)   | 119.16(15) |
| O(1)-B(1)-N(1)   | 105.73(14) |
| O(2)-B(1)-N(1)   | 112.23(14) |
| C(6)-B(1)-N(1)   | 88.07(12)  |
| N(1)-C(1)-C(2)   | 105.57(14) |
| N(1)-C(1)-C(7)   | 103.05(13) |
| C(2)-C(1)-C(7)   | 112.67(15) |
| N(1)-C(1)-H(1)   | 111.7      |
| C(2)-C(1)-H(1)   | 111.7      |
| C(7)-C(1)-H(1)   | 111.7      |
| C(1)-C(2)-C(3)   | 104.39(14) |
| C(1)-C(2)-H(2A)  | 110.9      |
| C(3)-C(2)-H(2A)  | 110.9      |
| C(1)-C(2)-H(2B)  | 110.9      |
| C(3)-C(2)-H(2B)  | 110.9      |
| H(2A)-C(2)-H(2B) | 108.9      |
| C(4)-C(3)-C(2)   | 105.21(15) |
| C(4)-C(3)-H(3A)  | 110.7      |
| C(2)-C(3)-H(3A)  | 110.7      |
| C(4)-C(3)-H(3B)  | 110.7      |
| C(2)-C(3)-H(3B)  | 110.7      |
| H(3A)-C(3)-H(3B) | 108.8      |
| N(1)-C(4)-C(3)   | 105.81(14) |
| N(1)-C(4)-C(5)   | 104.40(13) |
| C(3)-C(4)-C(5)   | 112.20(15) |
| N(1)-C(4)-H(4)   | 111.4      |
| C(3)-C(4)-H(4)   | 111.4      |

|                   |            |
|-------------------|------------|
| C(5)-C(4)-H(4)    | 111.4      |
| C(6)-C(5)-C(4)    | 105.77(13) |
| C(6)-C(5)-S(1)    | 111.84(11) |
| C(4)-C(5)-S(1)    | 112.72(12) |
| C(6)-C(5)-H(5)    | 108.8      |
| C(4)-C(5)-H(5)    | 108.8      |
| S(1)-C(5)-H(5)    | 108.8      |
| C(15)-C(6)-C(5)   | 115.31(14) |
| C(15)-C(6)-C(7)   | 108.58(14) |
| C(5)-C(6)-C(7)    | 106.60(14) |
| C(15)-C(6)-B(1)   | 123.11(15) |
| C(5)-C(6)-B(1)    | 100.85(14) |
| C(7)-C(6)-B(1)    | 100.49(13) |
| C(1)-C(7)-C(6)    | 107.44(13) |
| C(1)-C(7)-H(7A)   | 110.2      |
| C(6)-C(7)-H(7A)   | 110.2      |
| C(1)-C(7)-H(7B)   | 110.2      |
| C(6)-C(7)-H(7B)   | 110.2      |
| H(7A)-C(7)-H(7B)  | 108.5      |
| N(1)-C(8)-C(9)    | 118.38(15) |
| N(1)-C(8)-H(8A)   | 107.7      |
| C(9)-C(8)-H(8A)   | 107.7      |
| N(1)-C(8)-H(8B)   | 107.7      |
| C(9)-C(8)-H(8B)   | 107.7      |
| H(8A)-C(8)-H(8B)  | 107.1      |
| C(10)-C(9)-C(14)  | 118.38(19) |
| C(10)-C(9)-C(8)   | 120.23(19) |
| C(14)-C(9)-C(8)   | 121.39(19) |
| C(9)-C(10)-C(11)  | 120.7(2)   |
| C(9)-C(10)-H(10)  | 119.7      |
| C(11)-C(10)-H(10) | 119.7      |
| C(12)-C(11)-C(10) | 120.3(2)   |
| C(12)-C(11)-H(11) | 119.8      |
| C(10)-C(11)-H(11) | 119.8      |
| C(11)-C(12)-C(13) | 119.7(2)   |
| C(11)-C(12)-H(12) | 120.1      |
| C(13)-C(12)-H(12) | 120.1      |
| C(12)-C(13)-C(14) | 120.3(2)   |

|                     |            |
|---------------------|------------|
| C(12)-C(13)-H(13)   | 119.8      |
| C(14)-C(13)-H(13)   | 119.8      |
| C(13)-C(14)-C(9)    | 120.5(2)   |
| C(13)-C(14)-H(14)   | 119.7      |
| C(9)-C(14)-H(14)    | 119.7      |
| C(20)-C(15)-C(16)   | 116.9(2)   |
| C(20)-C(15)-C(6)    | 120.21(18) |
| C(16)-C(15)-C(6)    | 122.65(19) |
| C(15)-C(16)-C(17)   | 121.4(3)   |
| C(15)-C(16)-H(16)   | 119.3      |
| C(17)-C(16)-H(16)   | 119.3      |
| C(18)-C(17)-C(16)   | 120.4(3)   |
| C(18)-C(17)-H(17)   | 119.8      |
| C(16)-C(17)-H(17)   | 119.8      |
| C(17)-C(18)-C(19)   | 119.5(2)   |
| C(17)-C(18)-H(18)   | 120.3      |
| C(19)-C(18)-H(18)   | 120.3      |
| C(18)-C(19)-C(20)   | 120.2(3)   |
| C(18)-C(19)-H(19)   | 119.9      |
| C(20)-C(19)-H(19)   | 119.9      |
| C(19)-C(20)-C(15)   | 121.6(3)   |
| C(19)-C(20)-H(20)   | 119.2      |
| C(15)-C(20)-H(20)   | 119.2      |
| O(1)-C(21)-C(26)    | 107.62(18) |
| O(1)-C(21)-C(25)    | 106.90(17) |
| C(26)-C(21)-C(25)   | 109.3(2)   |
| O(1)-C(21)-C(22)    | 103.96(14) |
| C(26)-C(21)-C(22)   | 114.94(18) |
| C(25)-C(21)-C(22)   | 113.52(19) |
| O(2)-C(22)-C(24)    | 107.98(17) |
| O(2)-C(22)-C(23)    | 108.62(15) |
| C(24)-C(22)-C(23)   | 108.09(18) |
| O(2)-C(22)-C(21)    | 103.54(14) |
| C(24)-C(22)-C(21)   | 114.60(17) |
| C(23)-C(22)-C(21)   | 113.68(17) |
| C(22)-C(23)-H(23A)  | 109.5      |
| C(22)-C(23)-H(23B)  | 109.5      |
| H(23A)-C(23)-H(23B) | 109.5      |



|                     |            |
|---------------------|------------|
| C(22)-C(23)-H(23C)  | 109.5      |
| H(23A)-C(23)-H(23C) | 109.5      |
| H(23B)-C(23)-H(23C) | 109.5      |
| C(22)-C(24)-H(24A)  | 109.5      |
| C(22)-C(24)-H(24B)  | 109.5      |
| H(24A)-C(24)-H(24B) | 109.5      |
| C(22)-C(24)-H(24C)  | 109.5      |
| H(24A)-C(24)-H(24C) | 109.5      |
| H(24B)-C(24)-H(24C) | 109.5      |
| C(21)-C(25)-H(25A)  | 109.5      |
| C(21)-C(25)-H(25B)  | 109.5      |
| H(25A)-C(25)-H(25B) | 109.5      |
| C(21)-C(25)-H(25C)  | 109.5      |
| H(25A)-C(25)-H(25C) | 109.5      |
| H(25B)-C(25)-H(25C) | 109.5      |
| C(21)-C(26)-H(26A)  | 109.5      |
| C(21)-C(26)-H(26B)  | 109.5      |
| H(26A)-C(26)-H(26B) | 109.5      |
| C(21)-C(26)-H(26C)  | 109.5      |
| H(26A)-C(26)-H(26C) | 109.5      |
| H(26B)-C(26)-H(26C) | 109.5      |
| F(1)-C(27)-F(2)     | 104.3(2)   |
| F(1)-C(27)-S(1)     | 113.59(18) |
| F(2)-C(27)-S(1)     | 112.11(18) |
| F(1)-C(27)-H(27)    | 108.9      |
| F(2)-C(27)-H(27)    | 108.9      |
| S(1)-C(27)-H(27)    | 108.9      |

---

Symmetry transformations used to generate equivalent atoms:

**Table S4.** Anisotropic displacement parameters ( $\text{\AA}^2 \times 10^3$ ) for mo\_d8v18370\_0m. The anisotropic displacement factor exponent takes the form:  $-2\pi^2 [ h^2 a^{*2} U^{11} + \dots + 2 h k a^* b^* U^{12} ]$

|       | U <sup>11</sup> | U <sup>22</sup> | U <sup>33</sup> | U <sup>23</sup> | U <sup>13</sup> | U <sup>12</sup> |
|-------|-----------------|-----------------|-----------------|-----------------|-----------------|-----------------|
| S(1)  | 35(1)           | 49(1)           | 77(1)           | -5(1)           | 13(1)           | -2(1)           |
| F(1)  | 90(1)           | 107(1)          | 144(2)          | 46(1)           | 26(1)           | -28(1)          |
| F(2)  | 112(1)          | 57(1)           | 237(2)          | -33(1)          | 81(2)           | 2(1)            |
| N(1)  | 36(1)           | 39(1)           | 38(1)           | 4(1)            | 10(1)           | 4(1)            |
| O(1)  | 40(1)           | 44(1)           | 54(1)           | 5(1)            | -4(1)           | -2(1)           |
| O(2)  | 37(1)           | 39(1)           | 50(1)           | 2(1)            | 2(1)            | 2(1)            |
| B(1)  | 33(1)           | 39(1)           | 45(1)           | -2(1)           | 6(1)            | 3(1)            |
| C(1)  | 32(1)           | 47(1)           | 44(1)           | 6(1)            | 7(1)            | 2(1)            |
| C(2)  | 42(1)           | 50(1)           | 54(1)           | 16(1)           | 17(1)           | 12(1)           |
| C(3)  | 51(1)           | 39(1)           | 60(1)           | 6(1)            | 22(1)           | 9(1)            |
| C(4)  | 39(1)           | 37(1)           | 46(1)           | -1(1)           | 12(1)           | 1(1)            |
| C(5)  | 36(1)           | 41(1)           | 47(1)           | 3(1)            | 13(1)           | 3(1)            |
| C(6)  | 35(1)           | 42(1)           | 43(1)           | -2(1)           | 11(1)           | 3(1)            |
| C(7)  | 39(1)           | 52(1)           | 41(1)           | 1(1)            | 7(1)            | 4(1)            |
| C(8)  | 54(1)           | 49(1)           | 44(1)           | 8(1)            | 18(1)           | 7(1)            |
| C(9)  | 58(1)           | 52(1)           | 39(1)           | 7(1)            | 20(1)           | 9(1)            |
| C(10) | 58(1)           | 67(1)           | 61(1)           | 5(1)            | 30(1)           | 3(1)            |
| C(11) | 68(2)           | 94(2)           | 76(2)           | 17(2)           | 41(1)           | 23(1)           |
| C(12) | 110(2)          | 78(2)           | 67(2)           | 18(1)           | 54(2)           | 40(2)           |
| C(13) | 121(2)          | 62(2)           | 49(1)           | -4(1)           | 34(1)           | 15(1)           |
| C(14) | 77(2)           | 68(1)           | 39(1)           | -4(1)           | 15(1)           | 7(1)            |
| C(15) | 38(1)           | 61(1)           | 47(1)           | -7(1)           | 11(1)           | 4(1)            |
| C(16) | 62(1)           | 83(2)           | 60(1)           | -7(1)           | 27(1)           | -3(1)           |
| C(17) | 69(2)           | 132(3)          | 66(2)           | -17(2)          | 35(1)           | -11(2)          |
| C(18) | 81(2)           | 144(3)          | 83(2)           | -48(2)          | 41(2)           | 3(2)            |
| C(19) | 97(2)           | 96(2)           | 92(2)           | -42(2)          | 36(2)           | 6(2)            |
| C(20) | 70(2)           | 69(2)           | 66(1)           | -21(1)          | 24(1)           | 2(1)            |
| C(21) | 37(1)           | 47(1)           | 64(1)           | 11(1)           | 2(1)            | 5(1)            |
| C(22) | 41(1)           | 38(1)           | 63(1)           | 9(1)            | 6(1)            | 6(1)            |
| C(23) | 51(1)           | 64(1)           | 72(1)           | 22(1)           | 11(1)           | 0(1)            |
| C(24) | 72(2)           | 42(1)           | 106(2)          | -1(1)           | 15(1)           | 9(1)            |
| C(25) | 46(1)           | 75(2)           | 130(2)          | 7(2)            | 25(1)           | 13(1)           |
| C(26) | 66(2)           | 96(2)           | 69(2)           | 28(1)           | -12(1)          | -10(1)          |

C(27) 51(1) 55(1) 122(2) -5(1) 30(1) -5(1)

---

**Table S5.** Hydrogen coordinates ( $\times 10^4$ ) and isotropic displacement parameters ( $\text{\AA}^2 \times 10^{-3}$ ) for mo\_d8v18370\_0m.

|        | x    | y    | z    | U(eq) |
|--------|------|------|------|-------|
| H(1)   | 2614 | 3988 | 4876 | 49    |
| H(2A)  | 2475 | 6083 | 5070 | 57    |
| H(2B)  | 2635 | 6214 | 4265 | 57    |
| H(3A)  | 3291 | 7212 | 4896 | 58    |
| H(3B)  | 3116 | 7158 | 5688 | 58    |
| H(4)   | 3743 | 5854 | 6103 | 48    |
| H(5)   | 3789 | 5921 | 4560 | 49    |
| H(7A)  | 3096 | 4818 | 3817 | 53    |
| H(7B)  | 3005 | 3380 | 3970 | 53    |
| H(8A)  | 3381 | 4178 | 6807 | 58    |
| H(8B)  | 2936 | 3452 | 6328 | 58    |
| H(10)  | 2168 | 4403 | 6090 | 71    |
| H(11)  | 1681 | 5948 | 6396 | 90    |
| H(12)  | 1999 | 7743 | 7065 | 95    |
| H(13)  | 2808 | 7946 | 7497 | 90    |
| H(14)  | 3300 | 6394 | 7216 | 73    |
| H(16)  | 4147 | 5103 | 3657 | 79    |
| H(17)  | 4477 | 4262 | 2686 | 103   |
| H(18)  | 4456 | 2126 | 2462 | 119   |
| H(19)  | 4089 | 813  | 3195 | 111   |
| H(20)  | 3754 | 1643 | 4155 | 81    |
| H(23A) | 3322 | 1731 | 6843 | 95    |
| H(23B) | 3486 | 313  | 6937 | 95    |
| H(23C) | 3035 | 692  | 6280 | 95    |
| H(24A) | 3409 | -429 | 5345 | 112   |
| H(24B) | 3879 | -660 | 5995 | 112   |
| H(24C) | 3892 | 40   | 5202 | 112   |
| H(25A) | 4442 | 1518 | 5429 | 124   |
| H(25B) | 4630 | 639  | 6168 | 124   |
| H(25C) | 4802 | 2048 | 6185 | 124   |
| H(26A) | 4558 | 2392 | 7421 | 123   |
| H(26B) | 4353 | 1019 | 7423 | 123   |

|        |      |      |      |     |
|--------|------|------|------|-----|
| H(26C) | 4031 | 2196 | 7464 | 123 |
| H(27)  | 4989 | 6891 | 5415 | 89  |

---

**Table S6.** Torsion angles [°] for mo\_d8v18370\_0m.

---

|                      |             |
|----------------------|-------------|
| C(21)-O(1)-B(1)-O(2) | 15.1(2)     |
| C(21)-O(1)-B(1)-C(6) | -127.23(17) |
| C(21)-O(1)-B(1)-N(1) | 135.61(14)  |
| C(22)-O(2)-B(1)-O(1) | -1.14(19)   |
| C(22)-O(2)-B(1)-C(6) | 141.72(15)  |
| C(22)-O(2)-B(1)-N(1) | -117.55(15) |
| C(8)-N(1)-B(1)-O(1)  | -58.11(18)  |
| C(1)-N(1)-B(1)-O(1)  | 174.27(13)  |
| C(4)-N(1)-B(1)-O(1)  | 68.99(16)   |
| C(8)-N(1)-B(1)-O(2)  | 59.91(19)   |
| C(1)-N(1)-B(1)-O(2)  | -67.70(17)  |
| C(4)-N(1)-B(1)-O(2)  | -172.98(14) |
| C(8)-N(1)-B(1)-C(6)  | -179.23(14) |
| C(1)-N(1)-B(1)-C(6)  | 53.15(14)   |
| C(4)-N(1)-B(1)-C(6)  | -52.13(13)  |
| C(8)-N(1)-C(1)-C(2)  | 84.54(17)   |
| C(4)-N(1)-C(1)-C(2)  | -41.88(16)  |
| B(1)-N(1)-C(1)-C(2)  | -149.25(13) |
| C(8)-N(1)-C(1)-C(7)  | -157.08(14) |
| C(4)-N(1)-C(1)-C(7)  | 76.50(15)   |
| B(1)-N(1)-C(1)-C(7)  | -30.87(16)  |
| N(1)-C(1)-C(2)-C(3)  | 28.36(18)   |
| C(7)-C(1)-C(2)-C(3)  | -83.38(18)  |
| C(1)-C(2)-C(3)-C(4)  | -3.39(19)   |
| C(8)-N(1)-C(4)-C(3)  | -86.77(17)  |
| C(1)-N(1)-C(4)-C(3)  | 39.55(16)   |
| B(1)-N(1)-C(4)-C(3)  | 147.67(14)  |
| C(8)-N(1)-C(4)-C(5)  | 154.67(14)  |
| C(1)-N(1)-C(4)-C(5)  | -79.01(14)  |
| B(1)-N(1)-C(4)-C(5)  | 29.11(15)   |
| C(2)-C(3)-C(4)-N(1)  | -22.55(18)  |
| C(2)-C(3)-C(4)-C(5)  | 90.69(17)   |
| N(1)-C(4)-C(5)-C(6)  | 8.22(17)    |
| C(3)-C(4)-C(5)-C(6)  | -105.88(16) |
| N(1)-C(4)-C(5)-S(1)  | -114.28(12) |
| C(3)-C(4)-C(5)-S(1)  | 131.61(14)  |

|                         |             |
|-------------------------|-------------|
| C(27)-S(1)-C(5)-C(6)    | 145.84(15)  |
| C(27)-S(1)-C(5)-C(4)    | -95.13(15)  |
| C(4)-C(5)-C(6)-C(15)    | -179.93(14) |
| S(1)-C(5)-C(6)-C(15)    | -56.87(18)  |
| C(4)-C(5)-C(6)-C(7)     | 59.49(17)   |
| S(1)-C(5)-C(6)-C(7)     | -177.46(11) |
| C(4)-C(5)-C(6)-B(1)     | -45.03(16)  |
| S(1)-C(5)-C(6)-B(1)     | 78.03(14)   |
| O(1)-B(1)-C(6)-C(15)    | 78.6(2)     |
| O(2)-B(1)-C(6)-C(15)    | -59.8(2)    |
| N(1)-B(1)-C(6)-C(15)    | -174.29(15) |
| O(1)-B(1)-C(6)-C(5)     | -51.57(19)  |
| O(2)-B(1)-C(6)-C(5)     | 170.06(14)  |
| N(1)-B(1)-C(6)-C(5)     | 55.57(13)   |
| O(1)-B(1)-C(6)-C(7)     | -160.92(15) |
| O(2)-B(1)-C(6)-C(7)     | 60.71(18)   |
| N(1)-B(1)-C(6)-C(7)     | -53.78(13)  |
| N(1)-C(1)-C(7)-C(6)     | -6.04(18)   |
| C(2)-C(1)-C(7)-C(6)     | 107.25(17)  |
| C(15)-C(6)-C(7)-C(1)    | 173.39(15)  |
| C(5)-C(6)-C(7)-C(1)     | -61.80(17)  |
| B(1)-C(6)-C(7)-C(1)     | 42.97(17)   |
| C(1)-N(1)-C(8)-C(9)     | -59.0(2)    |
| C(4)-N(1)-C(8)-C(9)     | 59.3(2)     |
| B(1)-N(1)-C(8)-C(9)     | 179.59(16)  |
| N(1)-C(8)-C(9)-C(10)    | 93.3(2)     |
| N(1)-C(8)-C(9)-C(14)    | -86.9(2)    |
| C(14)-C(9)-C(10)-C(11)  | 2.3(3)      |
| C(8)-C(9)-C(10)-C(11)   | -177.90(19) |
| C(9)-C(10)-C(11)-C(12)  | 0.2(3)      |
| C(10)-C(11)-C(12)-C(13) | -2.1(4)     |
| C(11)-C(12)-C(13)-C(14) | 1.5(4)      |
| C(12)-C(13)-C(14)-C(9)  | 1.0(3)      |
| C(10)-C(9)-C(14)-C(13)  | -2.9(3)     |
| C(8)-C(9)-C(14)-C(13)   | 177.29(19)  |
| C(5)-C(6)-C(15)-C(20)   | 158.70(18)  |
| C(7)-C(6)-C(15)-C(20)   | -81.8(2)    |
| B(1)-C(6)-C(15)-C(20)   | 34.8(3)     |

|                         |             |
|-------------------------|-------------|
| C(5)-C(6)-C(15)-C(16)   | -26.6(3)    |
| C(7)-C(6)-C(15)-C(16)   | 92.9(2)     |
| B(1)-C(6)-C(15)-C(16)   | -150.42(19) |
| C(20)-C(15)-C(16)-C(17) | -0.9(3)     |
| C(6)-C(15)-C(16)-C(17)  | -175.8(2)   |
| C(15)-C(16)-C(17)-C(18) | -0.1(4)     |
| C(16)-C(17)-C(18)-C(19) | 0.8(5)      |
| C(17)-C(18)-C(19)-C(20) | -0.4(5)     |
| C(18)-C(19)-C(20)-C(15) | -0.6(4)     |
| C(16)-C(15)-C(20)-C(19) | 1.2(3)      |
| C(6)-C(15)-C(20)-C(19)  | 176.3(2)    |
| B(1)-O(1)-C(21)-C(26)   | -143.79(18) |
| B(1)-O(1)-C(21)-C(25)   | 98.9(2)     |
| B(1)-O(1)-C(21)-C(22)   | -21.5(2)    |
| B(1)-O(2)-C(22)-C(24)   | -133.41(17) |
| B(1)-O(2)-C(22)-C(23)   | 109.61(18)  |
| B(1)-O(2)-C(22)-C(21)   | -11.52(19)  |
| O(1)-C(21)-C(22)-O(2)   | 19.82(19)   |
| C(26)-C(21)-C(22)-O(2)  | 137.18(19)  |
| C(25)-C(21)-C(22)-O(2)  | -95.95(19)  |
| O(1)-C(21)-C(22)-C(24)  | 137.17(19)  |
| C(26)-C(21)-C(22)-C(24) | -105.5(2)   |
| C(25)-C(21)-C(22)-C(24) | 21.4(3)     |
| O(1)-C(21)-C(22)-C(23)  | -97.83(18)  |
| C(26)-C(21)-C(22)-C(23) | 19.5(2)     |
| C(25)-C(21)-C(22)-C(23) | 146.39(19)  |
| C(5)-S(1)-C(27)-F(1)    | -51.99(19)  |
| C(5)-S(1)-C(27)-F(2)    | 65.9(2)     |

---

Symmetry transformations used to generate equivalent atoms:



**<sup>1</sup>H NMR (400 MHz, CDCl<sub>3</sub>) spectrum of  
2-(2-(difluoromethylthio)-1-phenylethyl)-4,4,5,5-tetramethyl-1,3,2-dioxaborolane  
3a**

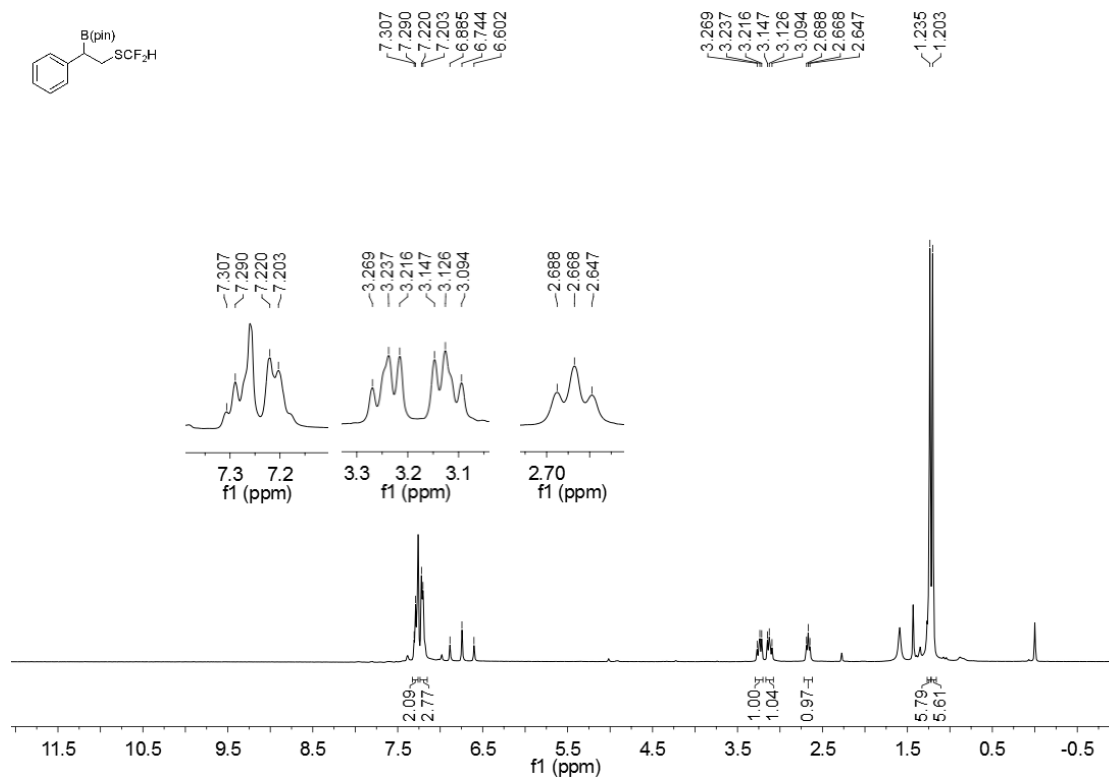

**<sup>13</sup>C NMR (151 MHz, CDCl<sub>3</sub>) spectrum of  
2-(2-(difluoromethylthio)-1-phenylethyl)-4,4,5,5-tetramethyl-1,3,2-dioxaborolane  
3a**

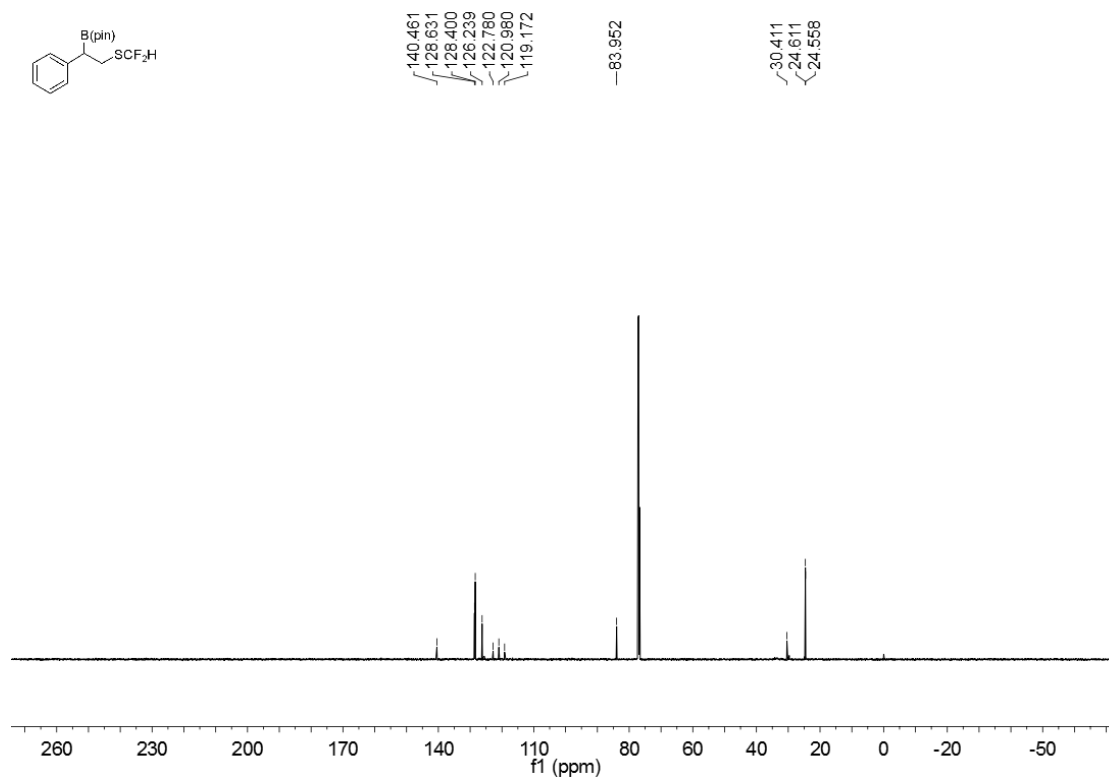

**$^{19}\text{F}$  NMR (376 MHz,  $\text{CDCl}_3$ ) spectrum of  
2-(2-(difluoromethylthio)-1-phenylethyl)-4,4,5,5-tetramethyl-1,3,2-dioxaborolane**

**3a**

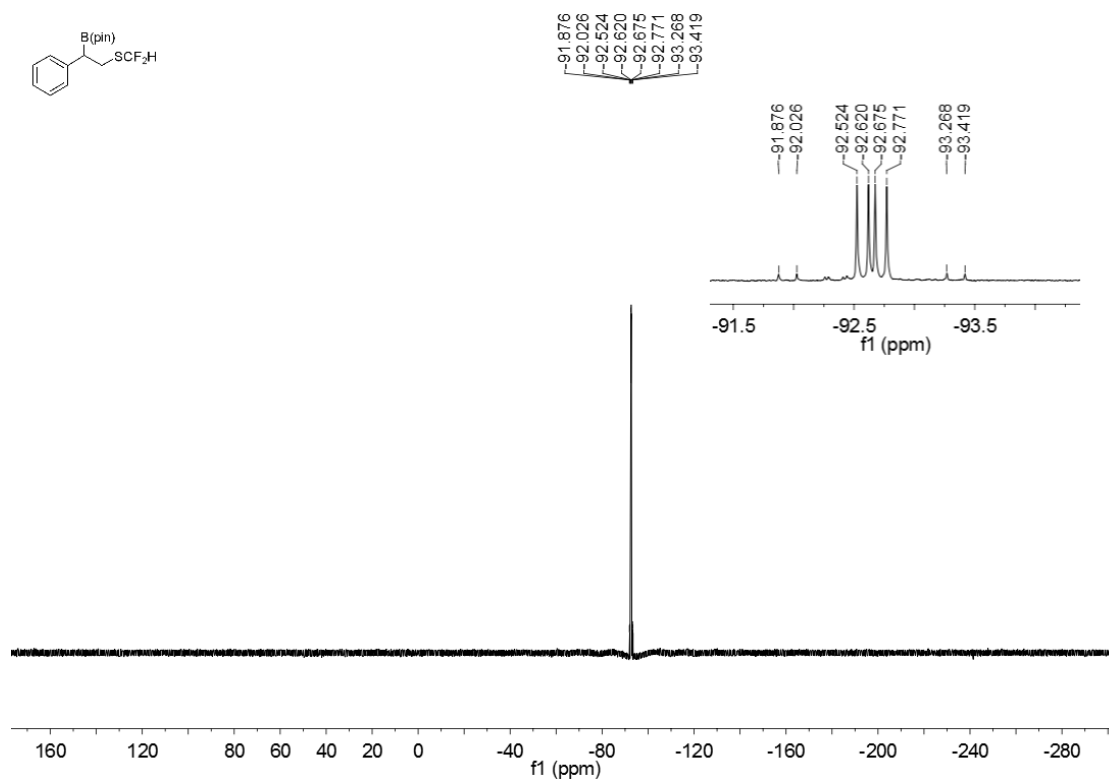

**$^{11}\text{B}$  NMR (128 MHz,  $\text{CD}_3\text{Cl}_3$ ) spectrum of  
2-(2-(difluoromethylthio)-1-phenylethyl)-4,4,5,5-tetramethyl-1,3,2-dioxaborolane**

**3a**

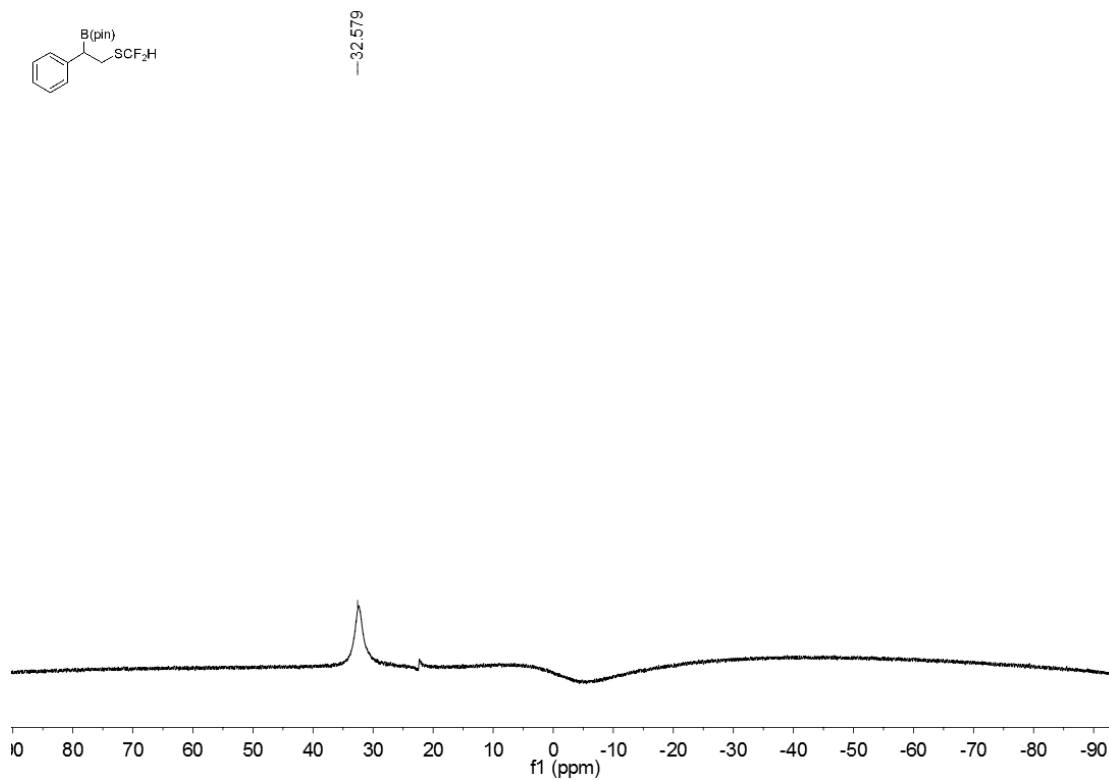

**<sup>1</sup>H NMR (400 MHz, CDCl<sub>3</sub>) spectrum of  
(±)-2-((3*R*,4*R*)-3-(difluoromethylthio)-4-phenyltetrahydro-2*H*-pyran-4-yl)-4,4,5,5-tetramethyl-1,3,2-dioxaborolane **3b****

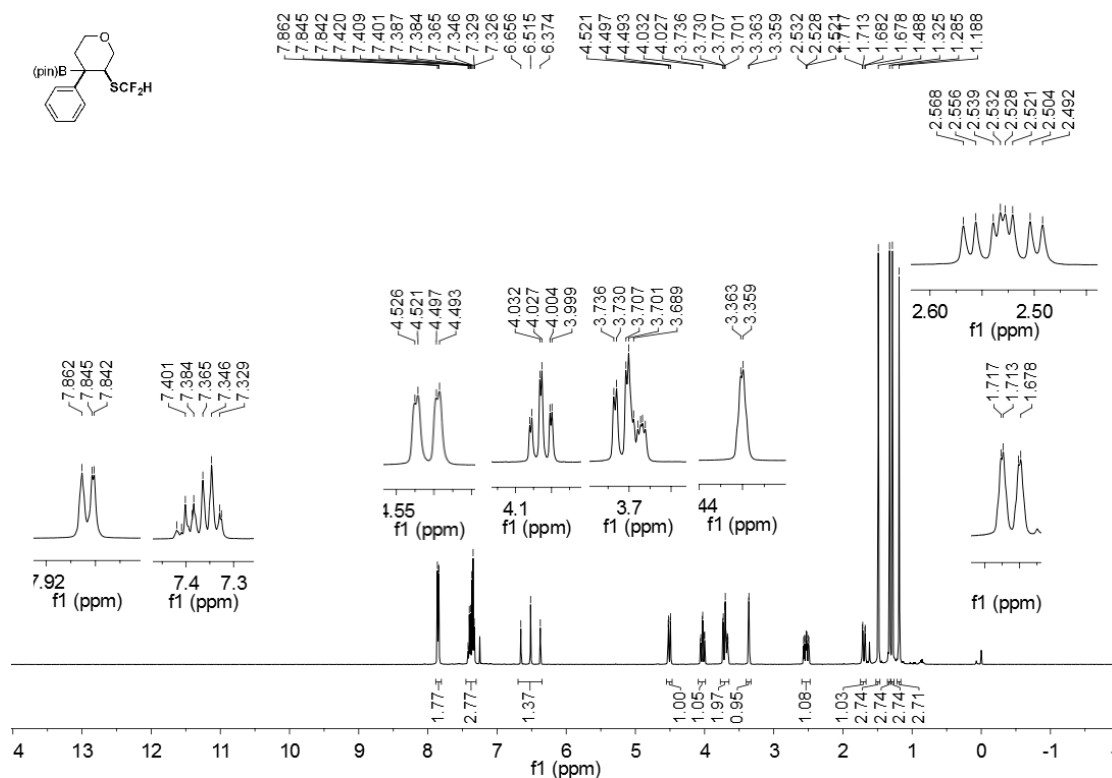

**<sup>13</sup>C NMR (101 MHz, CDCl<sub>3</sub>) spectrum of  
(±)-2-((3*R*,4*R*)-3-(difluoromethylthio)-4-phenyltetrahydro-2*H*-pyran-4-yl)-4,4,5,5-tetramethyl-1,3,2-dioxaborolane **3b****

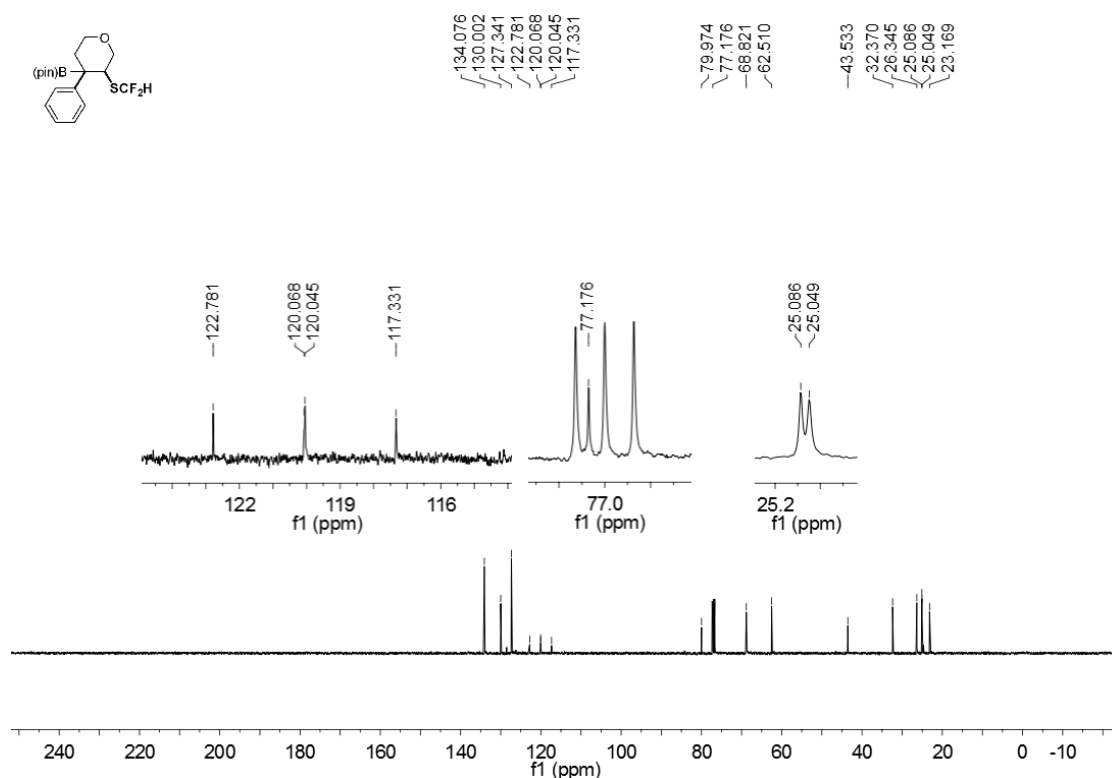

**$^{19}\text{F}$  NMR (376 MHz,  $\text{CDCl}_3$ ) spectrum of  
(±)-2-((3*R*,4*R*)-3-(difluoromethylthio)-4-phenyltetrahydro-2*H*-pyran-4-yl)-4,4,5,5-  
-tetramethyl-1,3,2-dioxaborolane 3b**

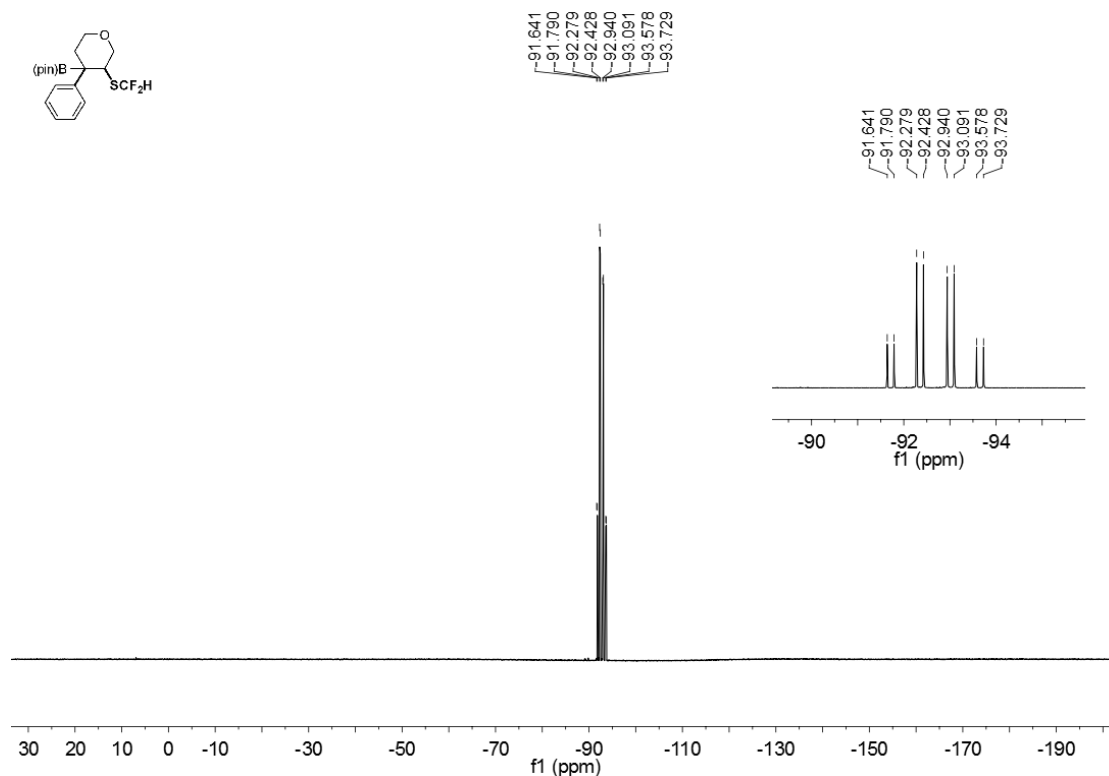

**$^{11}\text{B}$  NMR (128 MHz,  $\text{CD}_3\text{Cl}_3$ ) spectrum of  
(±)-2-((3*R*,4*R*)-3-(difluoromethylthio)-4-phenyltetrahydro-2*H*-pyran-4-yl)-4,4,5,5-  
-tetramethyl-1,3,2-dioxaborolane 3b**

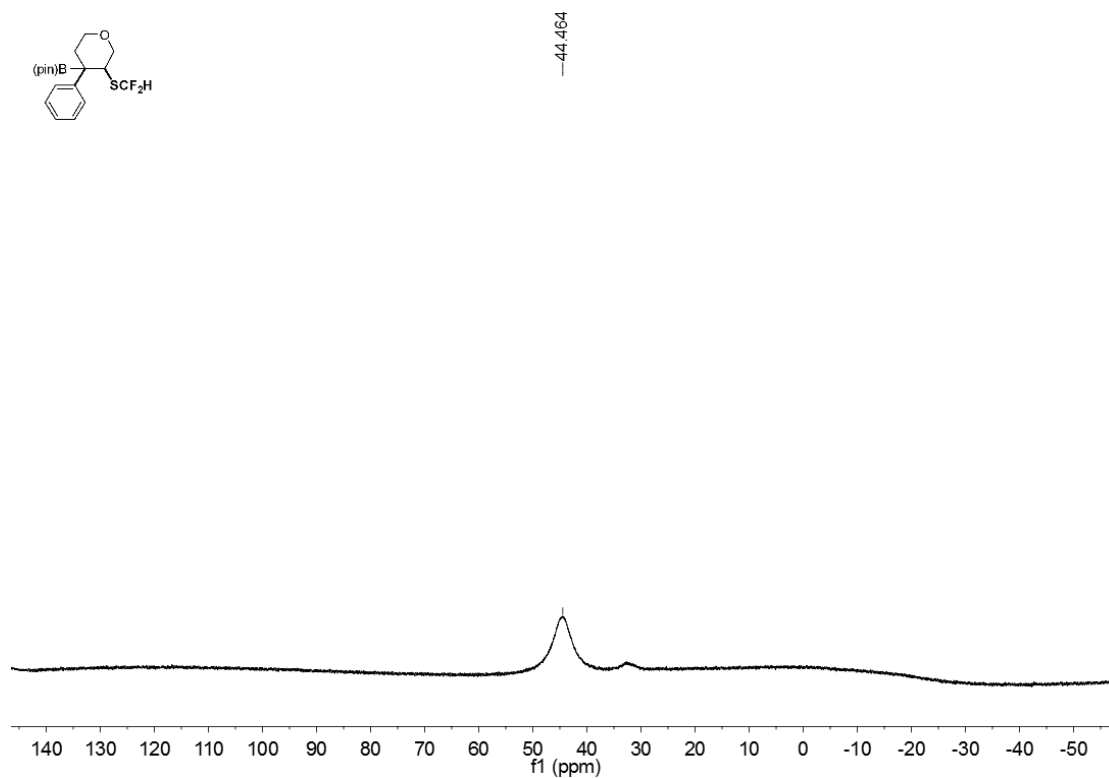

**<sup>1</sup>H NMR (400 MHz, CDCl<sub>3</sub>) spectrum of (±)-2-((3*R*,4*R*)-3-(difluoromethylthio)-4-(4-methoxyphenyl)tetrahydro-2*H*-pyran-4-yl)-4,4,5,5-tetramethyl-1,3,2-dioxaborolane 3c**

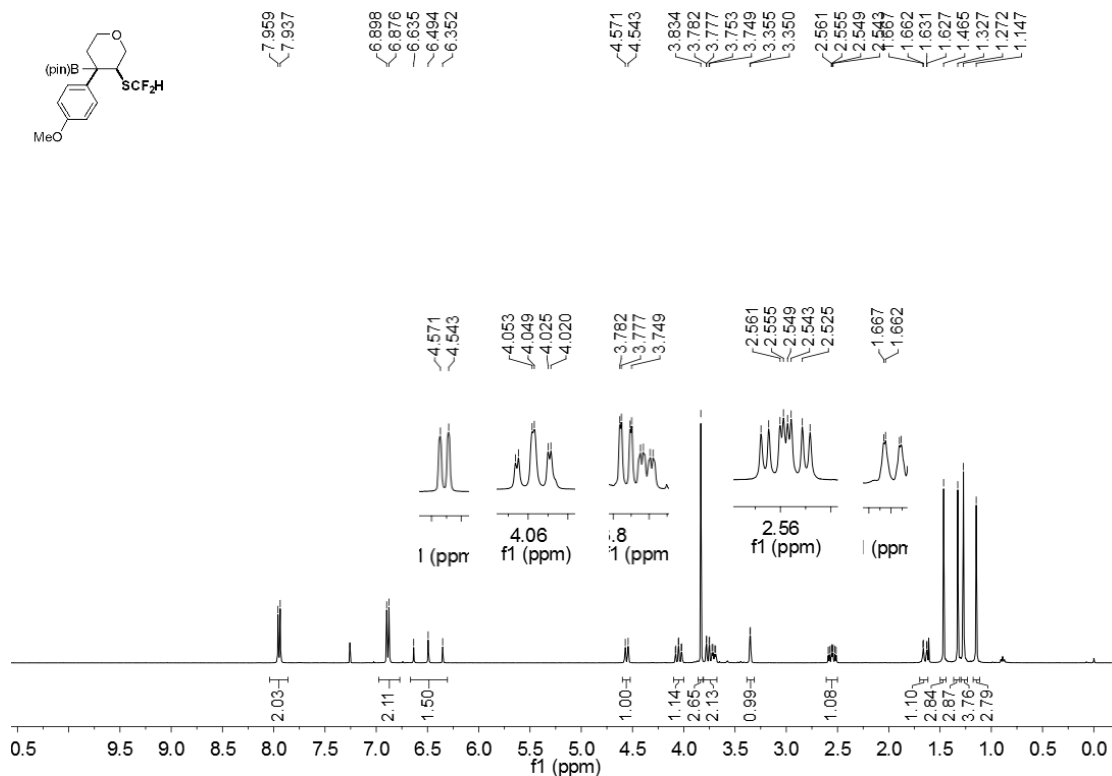

**<sup>13</sup>C NMR (101 MHz, CDCl<sub>3</sub>) spectrum of (±)-2-((3*R*,4*R*)-3-(difluoromethylthio)-4-(4-methoxyphenyl)tetrahydro-2*H*-pyran-4-yl)-4,4,5,5-tetramethyl-1,3,2-dioxaborolane 3c**

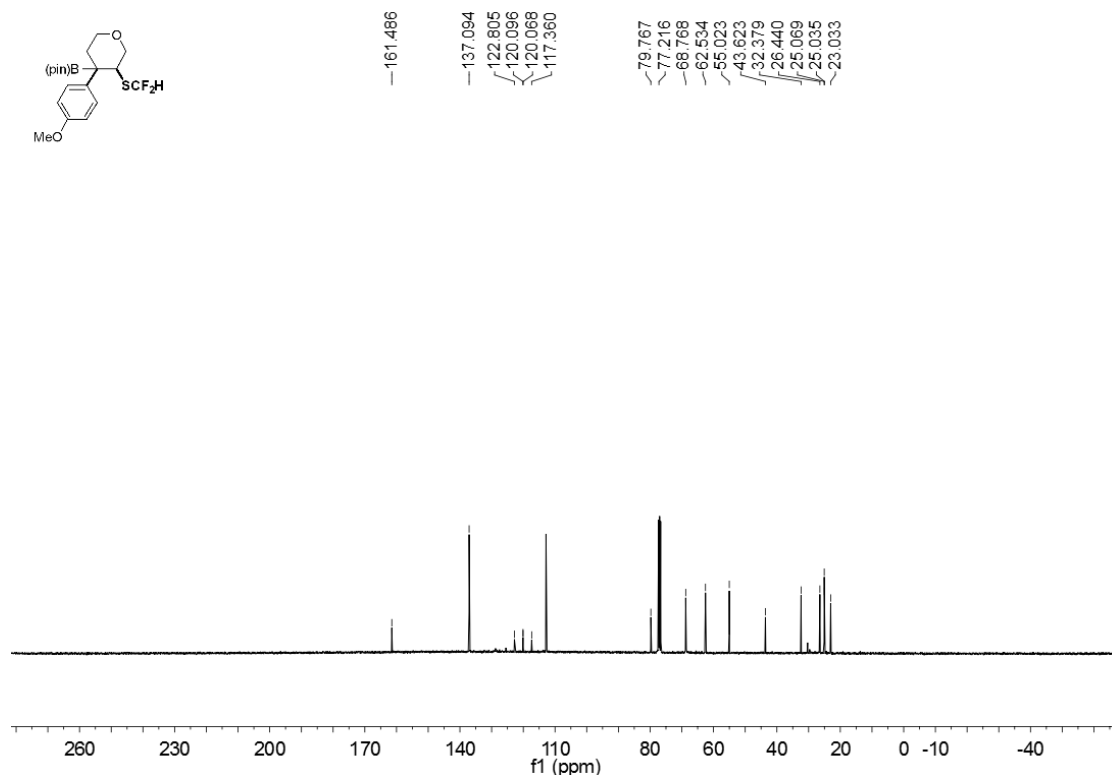

**$^{19}\text{F}$  NMR (376 MHz,  $\text{CDCl}_3$ ) spectrum of  
(±)-2-((3*R*,4*R*)-3-(difluoromethylthio)-4-(4-methoxyphenyl)tetrahydro-2*H*-pyran-4-yl)-4,4,5,5-tetramethyl-1,3,2-dioxaborolane 3c**

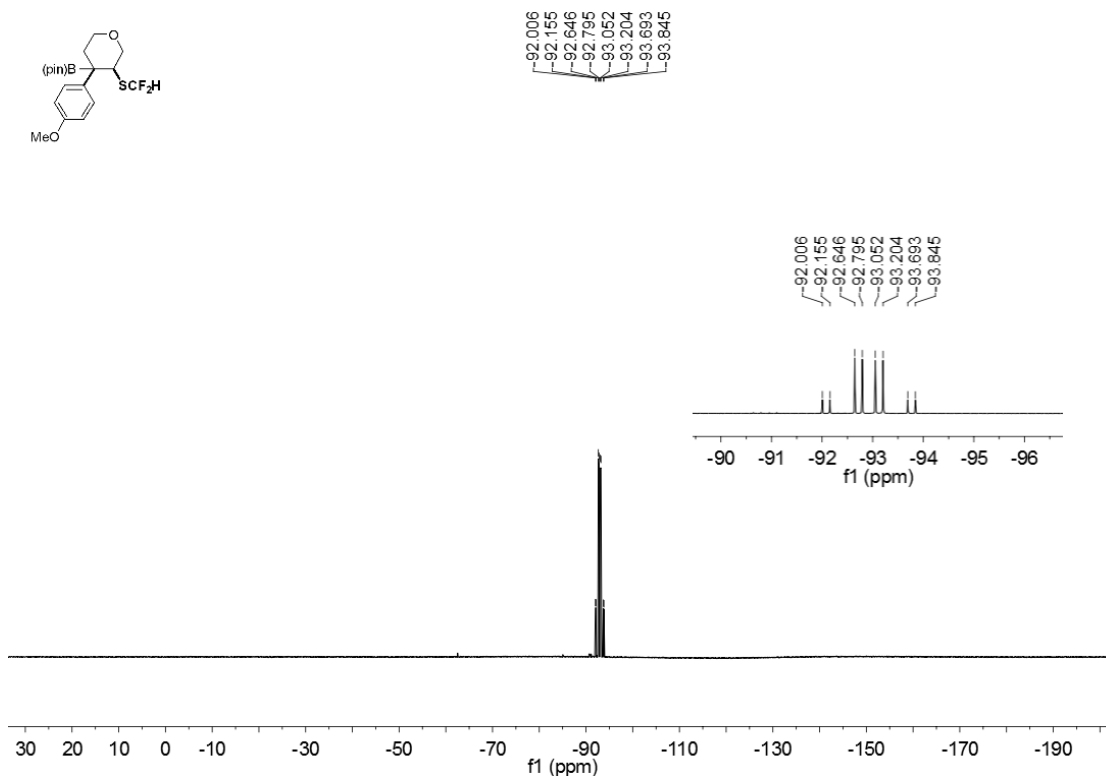

**$^{11}\text{B}$  NMR (128 MHz,  $\text{CD}_3\text{Cl}_3$ ) spectrum of  
(±)-2-((3*R*,4*R*)-3-(difluoromethylthio)-4-(4-methoxyphenyl)tetrahydro-2*H*-pyran-4-yl)-4,4,5,5-tetramethyl-1,3,2-dioxaborolane 3c**

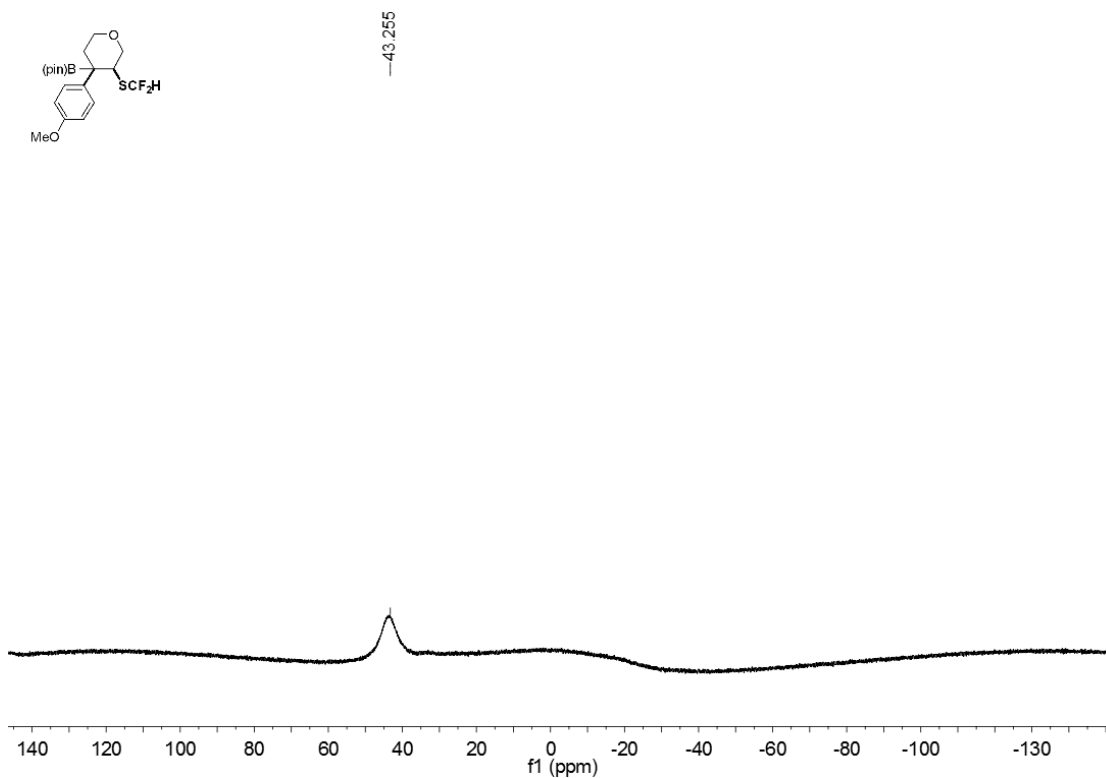

**<sup>1</sup>H NMR (400 MHz, CDCl<sub>3</sub>) spectrum of  
(±)-2-((3*R*,4*R*)-3-(difluoromethylthio)-4-(4-fluorophenyl)tetrahydro-2*H*-pyran-4-yl)-4,4,5,5-tetramethyl-1,3,2-dioxaborolane 3d**

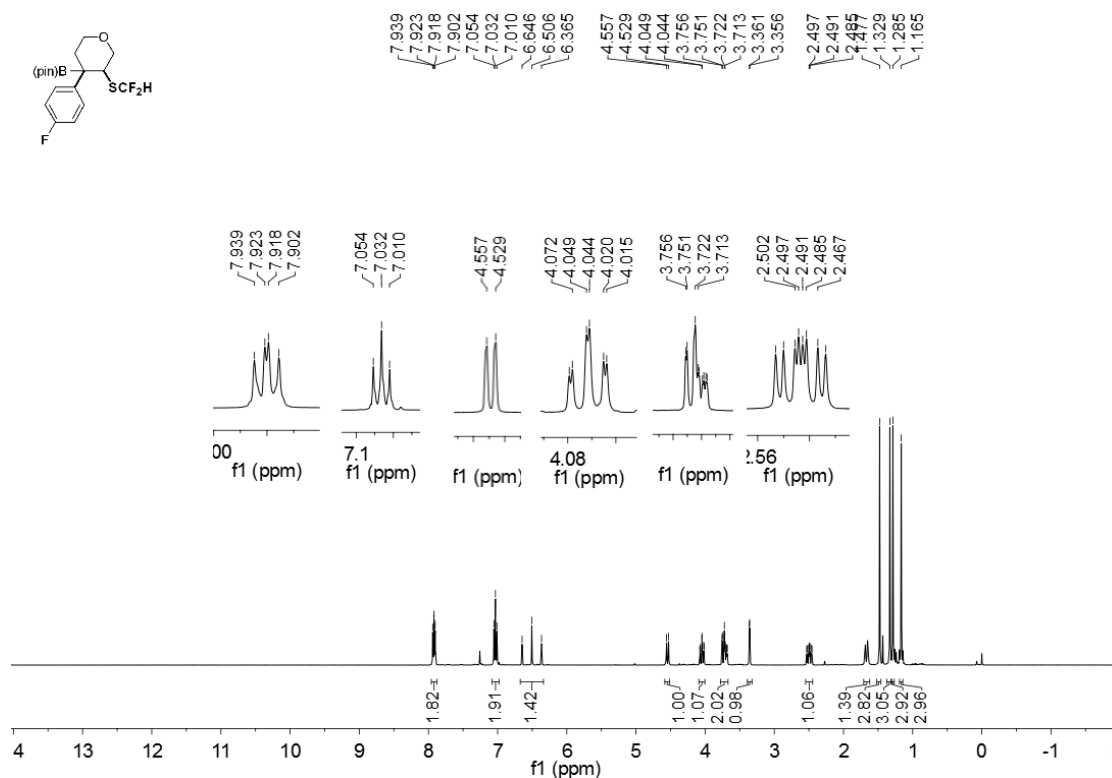

**<sup>13</sup>C NMR (101 MHz, CDCl<sub>3</sub>) spectrum of  
(±)-2-((3*R*,4*R*)-3-(difluoromethylthio)-4-(4-fluorophenyl)tetrahydro-2*H*-pyran-4-yl)-4,4,5,5-tetramethyl-1,3,2-dioxaborolane 3d**

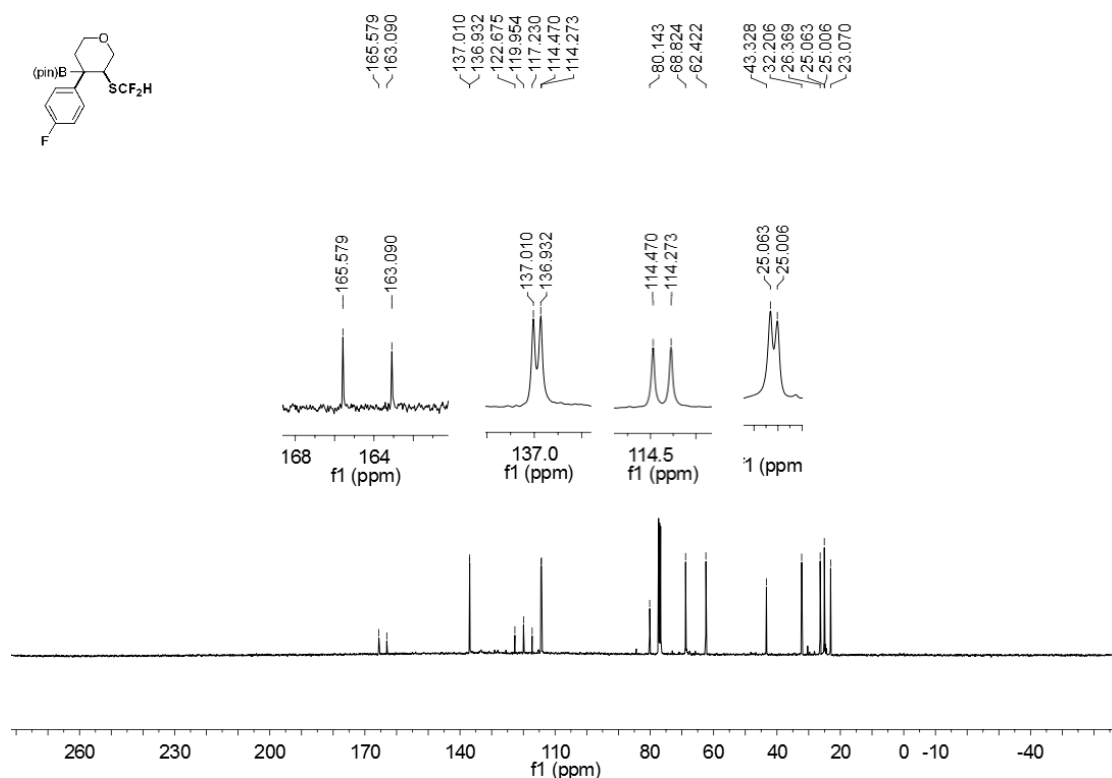

**<sup>19</sup>F NMR (376 MHz, CDCl<sub>3</sub>) spectrum of  
 (±)-2-((3*R*,4*R*)-3-(difluoromethylthio)-4-(4-fluorophenyl)tetrahydro-2*H*-pyran-4-yl)-4,4,5,5-tetramethyl-1,3,2-dioxaborolane 3d**

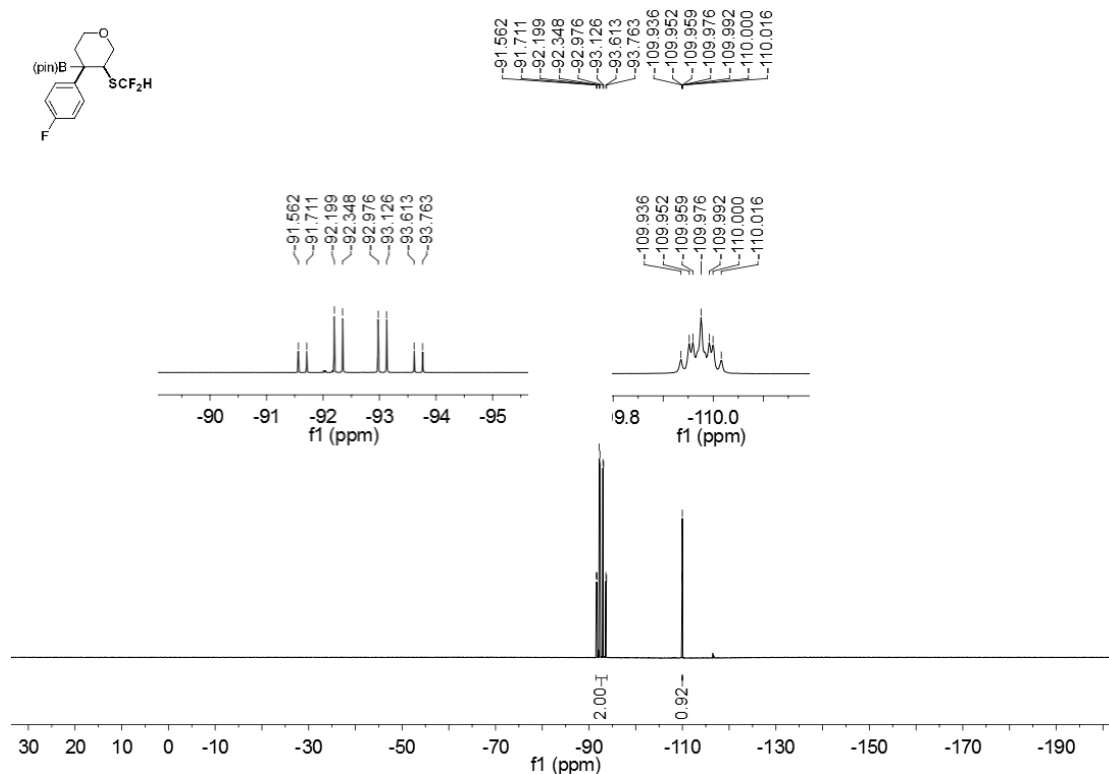

**<sup>11</sup>B NMR (128 MHz, CD<sub>3</sub>Cl<sub>3</sub>) spectrum of  
 (±)-2-((3*R*,4*R*)-3-(difluoromethylthio)-4-(4-fluorophenyl)tetrahydro-2*H*-pyran-4-yl)-4,4,5,5-tetramethyl-1,3,2-dioxaborolane 3d**

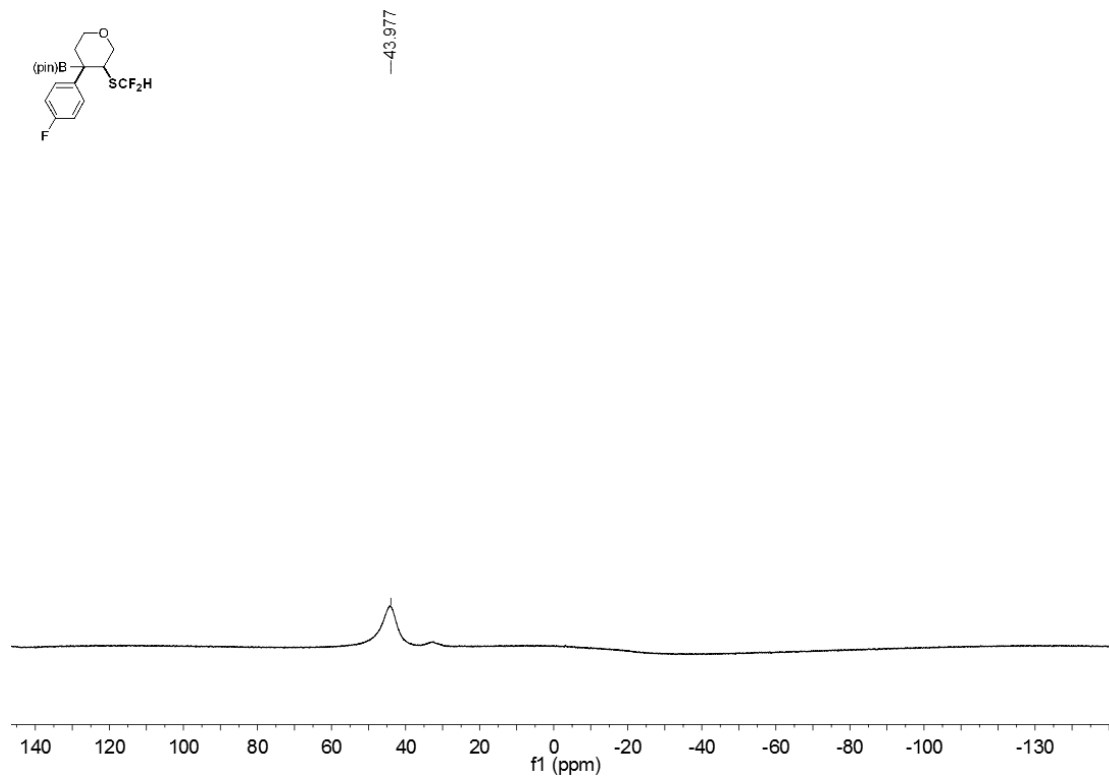



**<sup>1</sup>H NMR (400 MHz, CDCl<sub>3</sub>) spectrum of  
(±)-2-((3*R*,4*R*)-4-(4-chlorophenyl)-3-(difluoromethylthio)tetrahydro-2*H*-pyran-4-yl)-4,4,5,5-tetramethyl-1,3,2-dioxaborolane **3e****

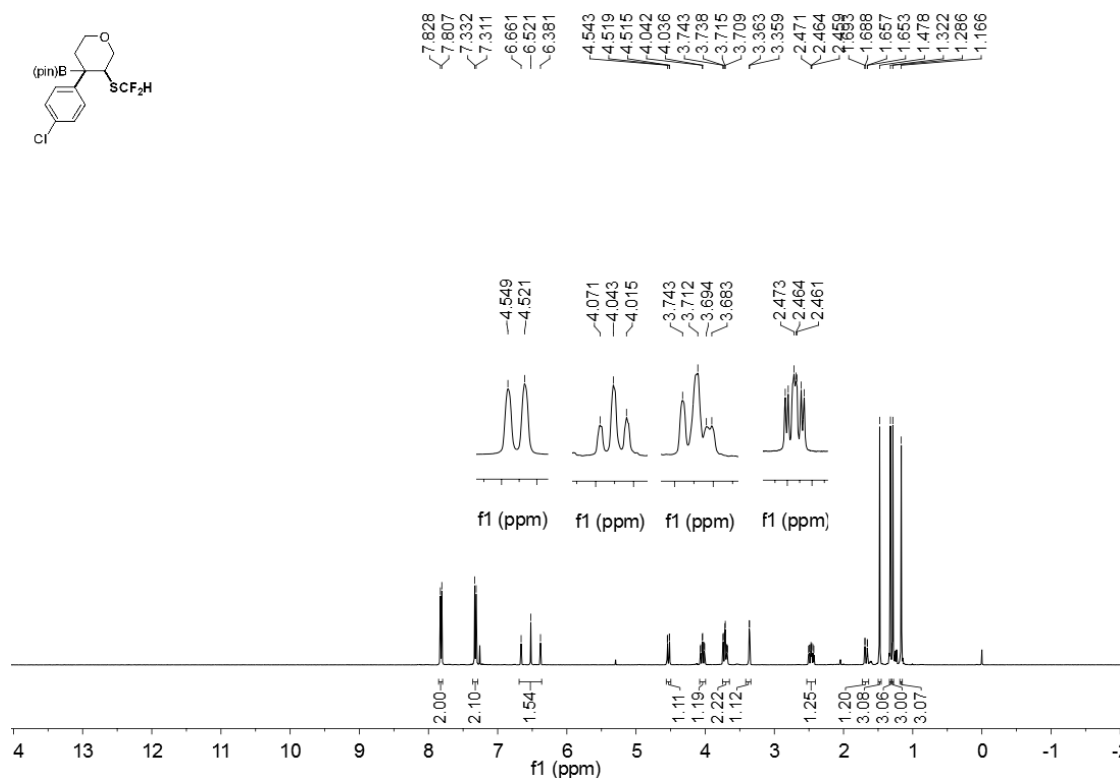

**<sup>13</sup>C NMR (101 MHz, CDCl<sub>3</sub>) spectrum of  
(±)-2-((3*R*,4*R*)-4-(4-chlorophenyl)-3-(difluoromethylthio)tetrahydro-2*H*-pyran-4-yl)-4,4,5,5-tetramethyl-1,3,2-dioxaborolane **3e****

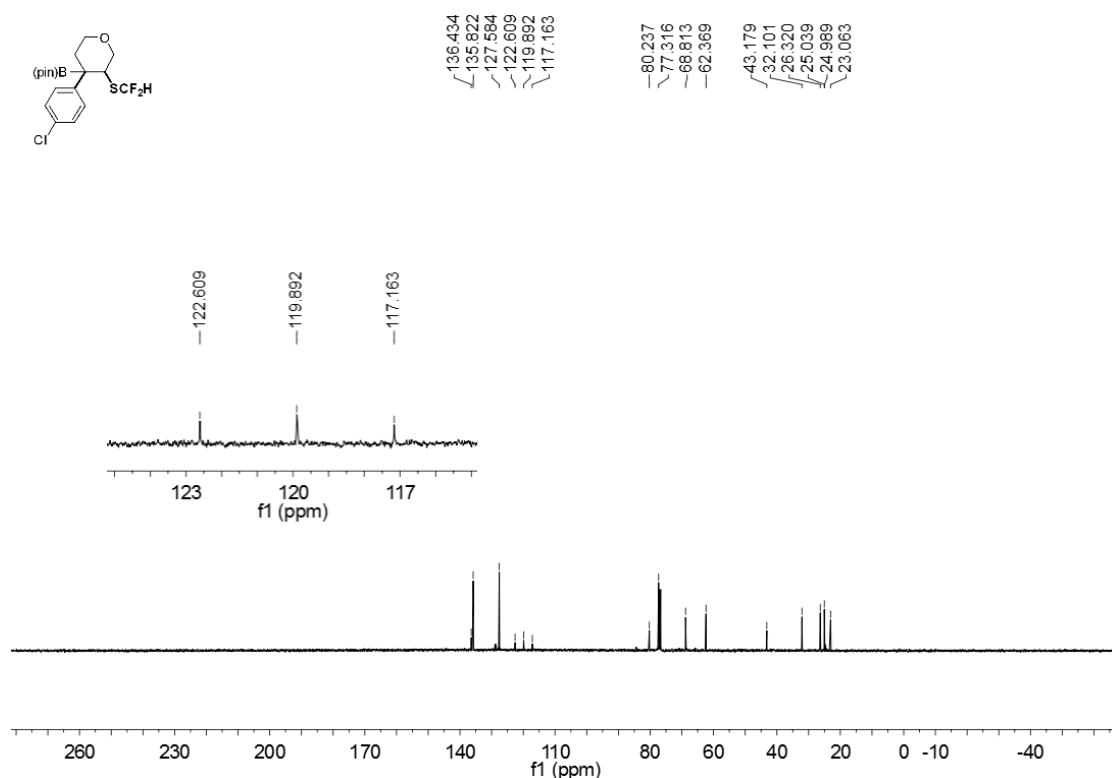

**$^{19}\text{F}$  NMR (376 MHz,  $\text{CDCl}_3$ ) spectrum of  
(±)-2-((3*R*,4*R*)-4-(4-chlorophenyl)-3-(difluoromethylthio)tetrahydro-2*H*-pyran-4-yl)-4,4,5,5-tetramethyl-1,3,2-dioxaborolane 3e**

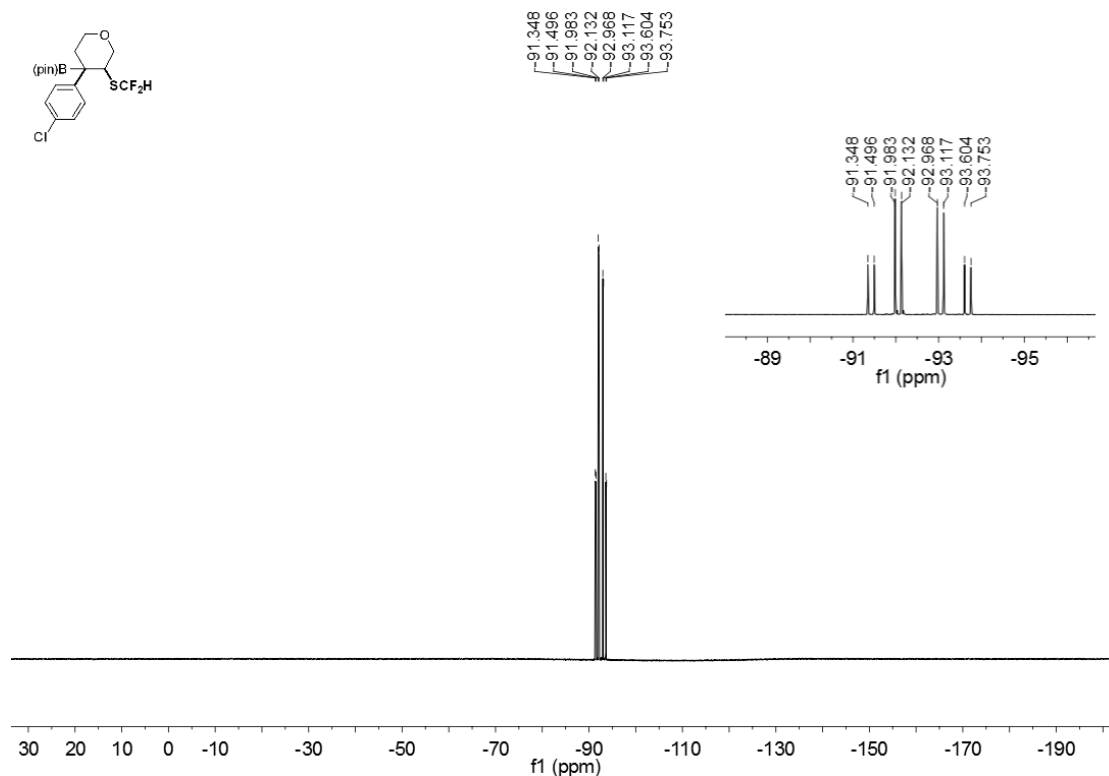

**$^{11}\text{B}$  NMR (128 MHz,  $\text{CD}_3\text{Cl}_3$ ) spectrum of  
(±)-2-((3*R*,4*R*)-4-(4-chlorophenyl)-3-(difluoromethylthio)tetrahydro-2*H*-pyran-4-yl)-4,4,5,5-tetramethyl-1,3,2-dioxaborolane 3e**

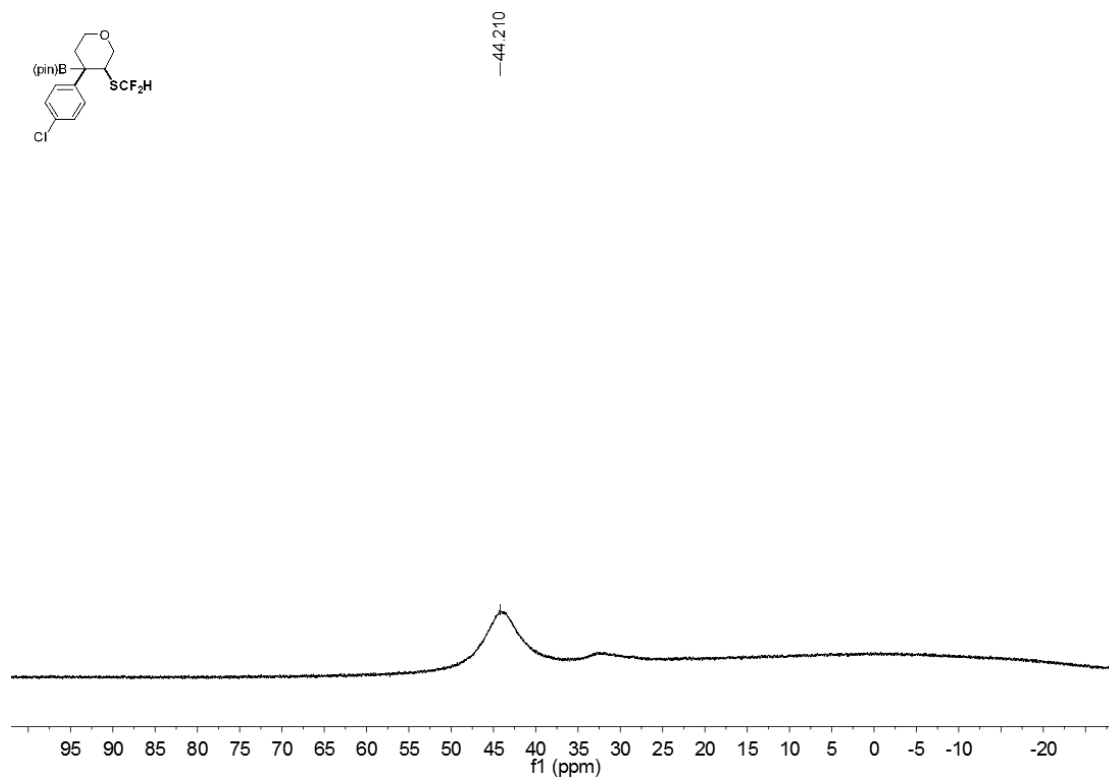

**<sup>1</sup>H NMR (400 MHz, CDCl<sub>3</sub>) spectrum of (±)-2-((3*R*,4*R*)-4-(4-bromophenyl)-3-(difluoromethylthio)tetrahydro-2*H*-pyran-4-yl)-4,4,5,5-tetramethyl-1,3,2-dioxaborolane 3f**

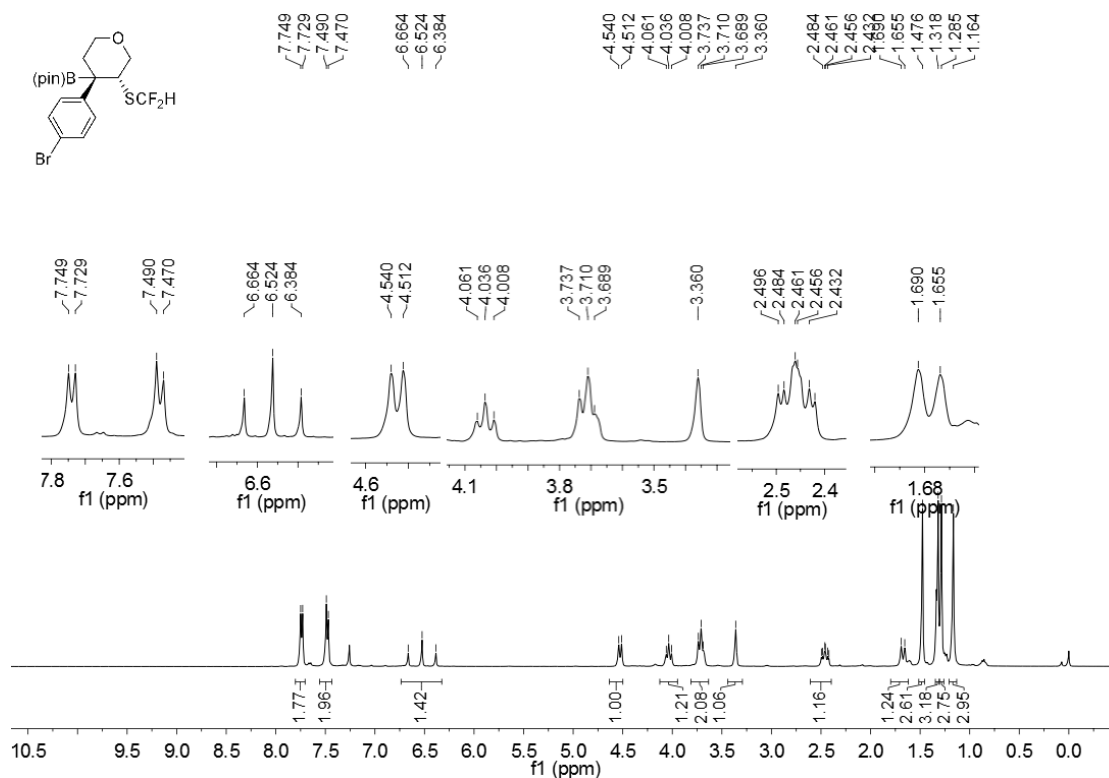

**<sup>13</sup>C NMR (101 MHz, CDCl<sub>3</sub>) spectrum of (±)-2-((3*R*,4*R*)-4-(4-bromophenyl)-3-(difluoromethylthio)tetrahydro-2*H*-pyran-4-yl)-4,4,5,5-tetramethyl-1,3,2-dioxaborolane 3f**

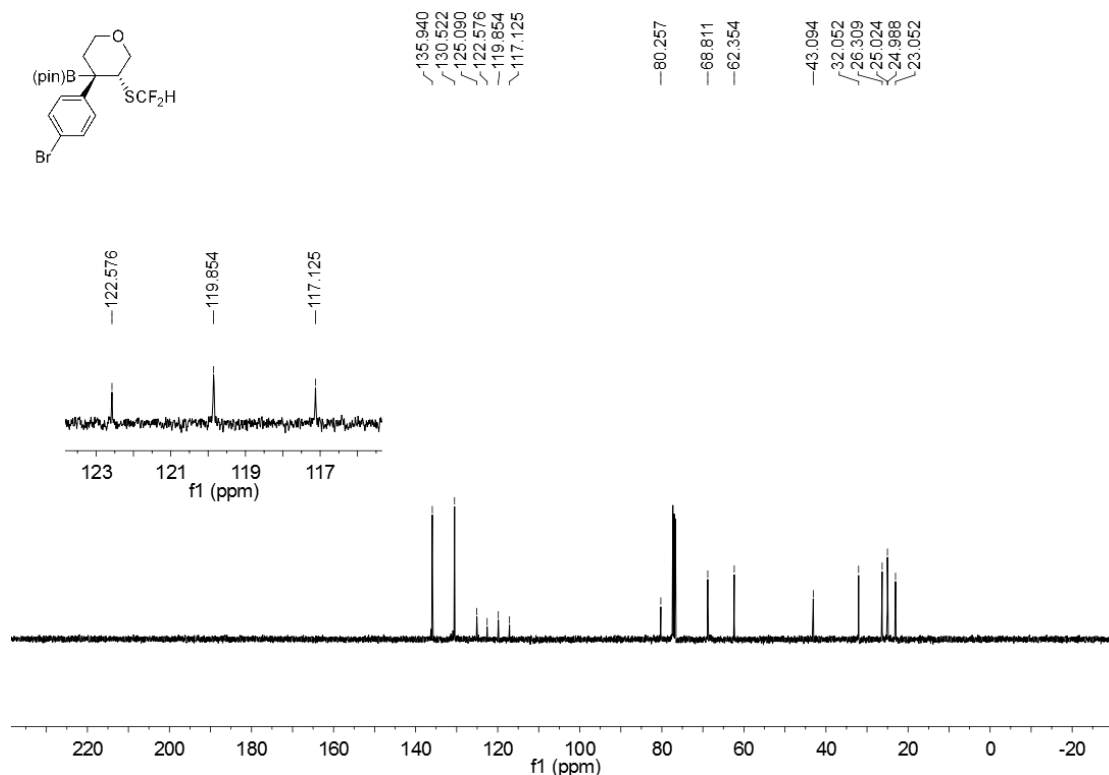

**$^{19}\text{F}$  NMR (376 MHz,  $\text{CDCl}_3$ ) spectrum of  
( $\pm$ )-2-((3*R*,4*R*)-4-(4-bromophenyl)-3-(difluoromethylthio)tetrahydro-2*H*-pyran-4-yl)-4,4,5,5-tetramethyl-1,3,2-dioxaborolane 3f**

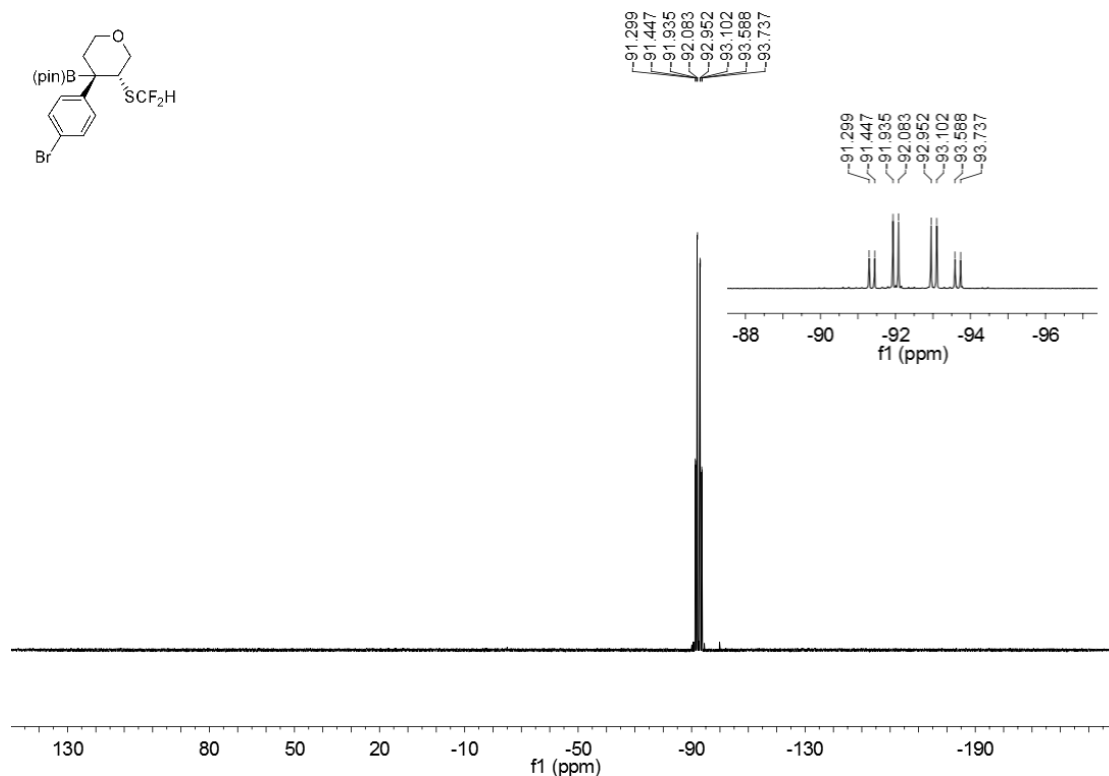

**$^{11}\text{B}$  NMR (128 MHz,  $\text{CD}_3\text{Cl}_3$ ) spectrum of  
( $\pm$ )-2-((3*R*,4*R*)-4-(4-bromophenyl)-3-(difluoromethylthio)tetrahydro-2*H*-pyran-4-yl)-4,4,5,5-tetramethyl-1,3,2-dioxaborolane 3f**

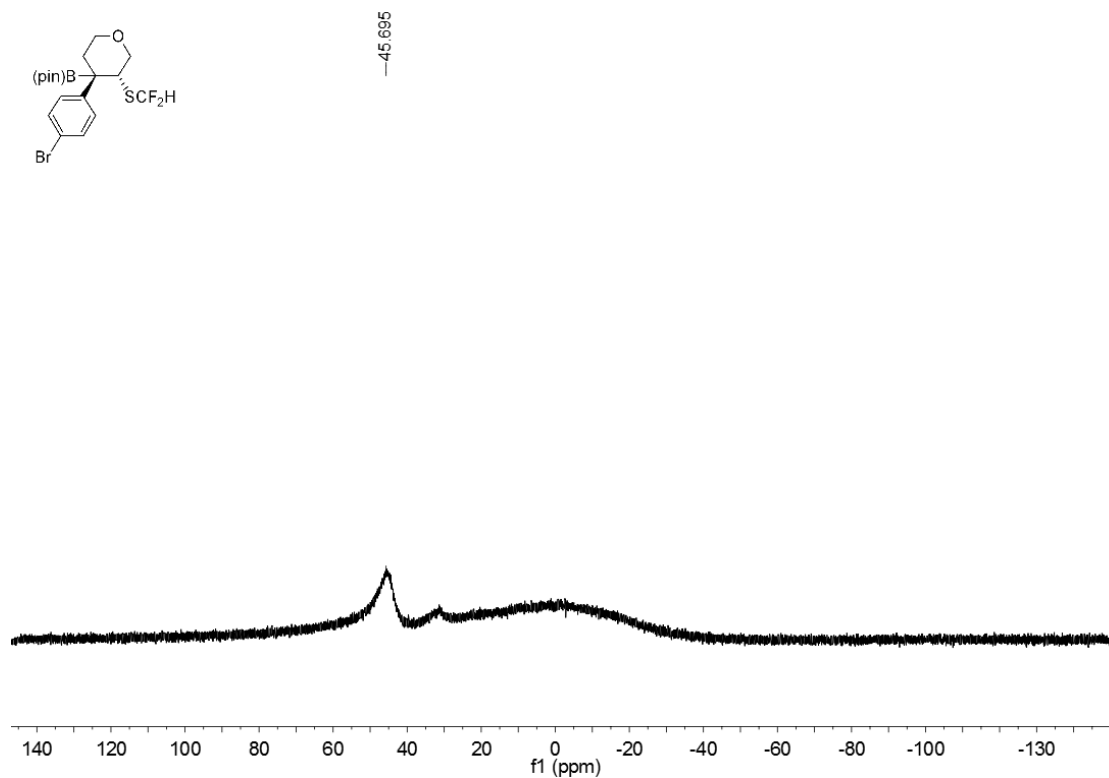

**$^1\text{H}$  NMR (400 MHz,  $\text{CDCl}_3$ ) spectrum of  
 ( $\pm$ )-2-((3*R*,4*R*)-3-(difluoromethylthio)-4-(4-(trifluoromethyl)phenyl)tetrahydro-2-*H*-pyran-4-yl)-4,4,5,5-tetramethyl-1,3,2-dioxaborolane **3g****

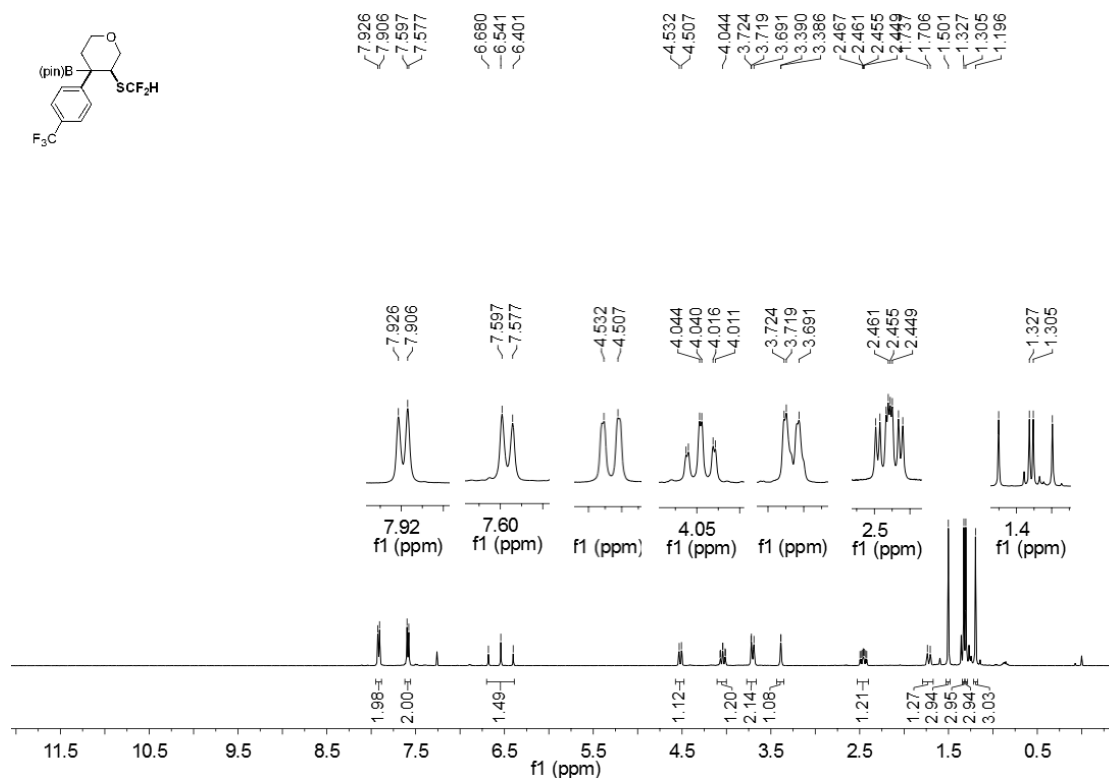

**$^{13}\text{C}$  NMR (101 MHz,  $\text{CDCl}_3$ ) spectrum of  
 ( $\pm$ )-2-((3*R*,4*R*)-3-(difluoromethylthio)-4-(4-(trifluoromethyl)phenyl)tetrahydro-2-*H*-pyran-4-yl)-4,4,5,5-tetramethyl-1,3,2-dioxaborolane **3g****

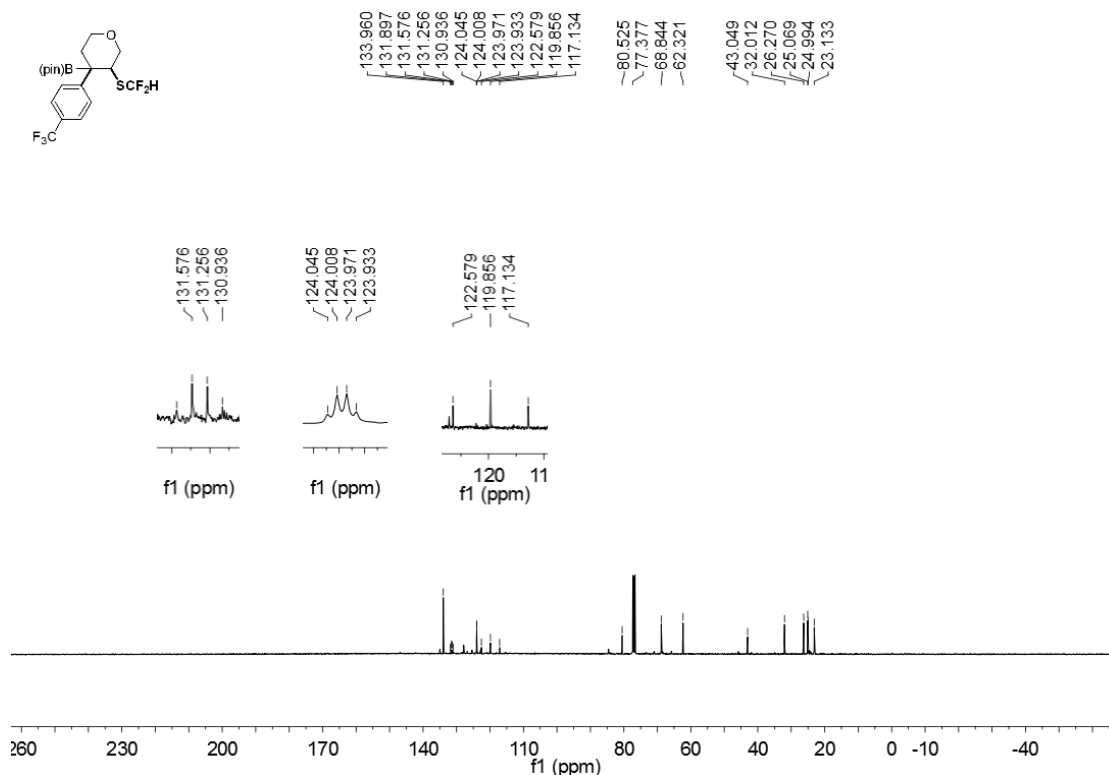

**<sup>19</sup>F NMR (376 MHz, CDCl<sub>3</sub>) spectrum of  
(±)-2-((3*R*,4*R*)-3-(difluoromethylthio)-4-(4-(trifluoromethyl)phenyl)tetrahydro-2-*H*-pyran-4-yl)-4,4,5,5-tetramethyl-1,3,2-dioxaborolane 3g**

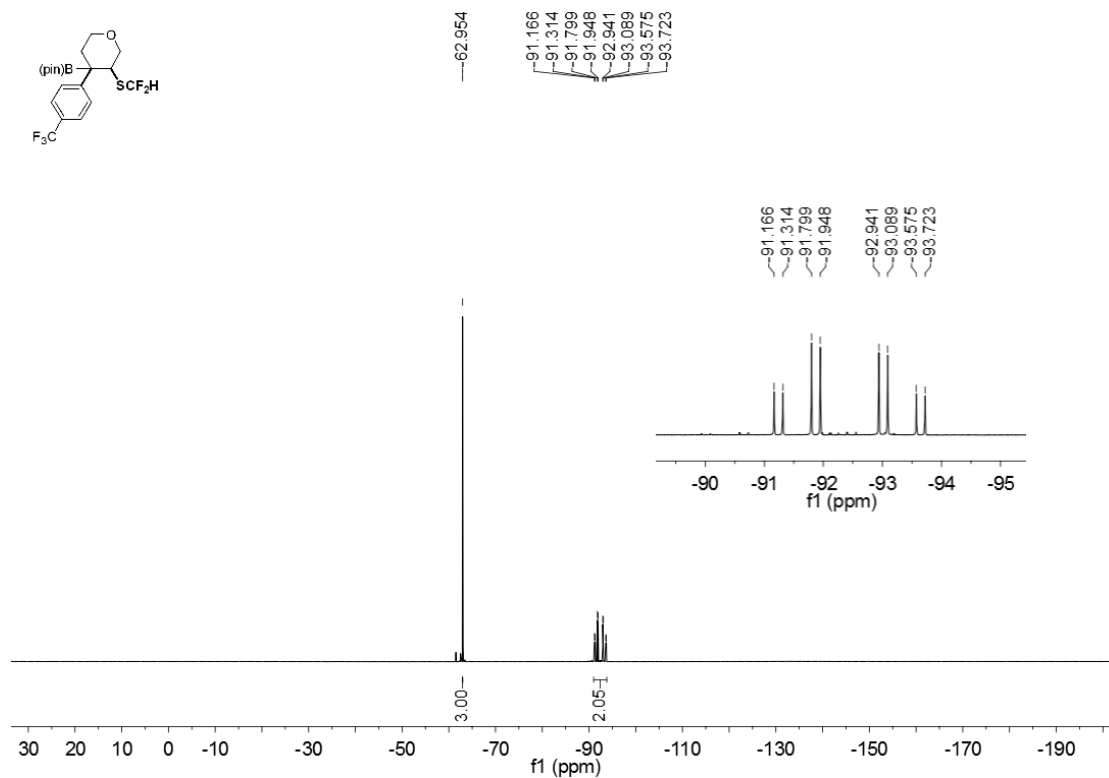

**<sup>11</sup>B NMR (128 MHz, CD<sub>3</sub>Cl<sub>3</sub>) spectrum of  
(±)-2-((3*R*,4*R*)-3-(difluoromethylthio)-4-(4-(trifluoromethyl)phenyl)tetrahydro-2-*H*-pyran-4-yl)-4,4,5,5-tetramethyl-1,3,2-dioxaborolane 3g**

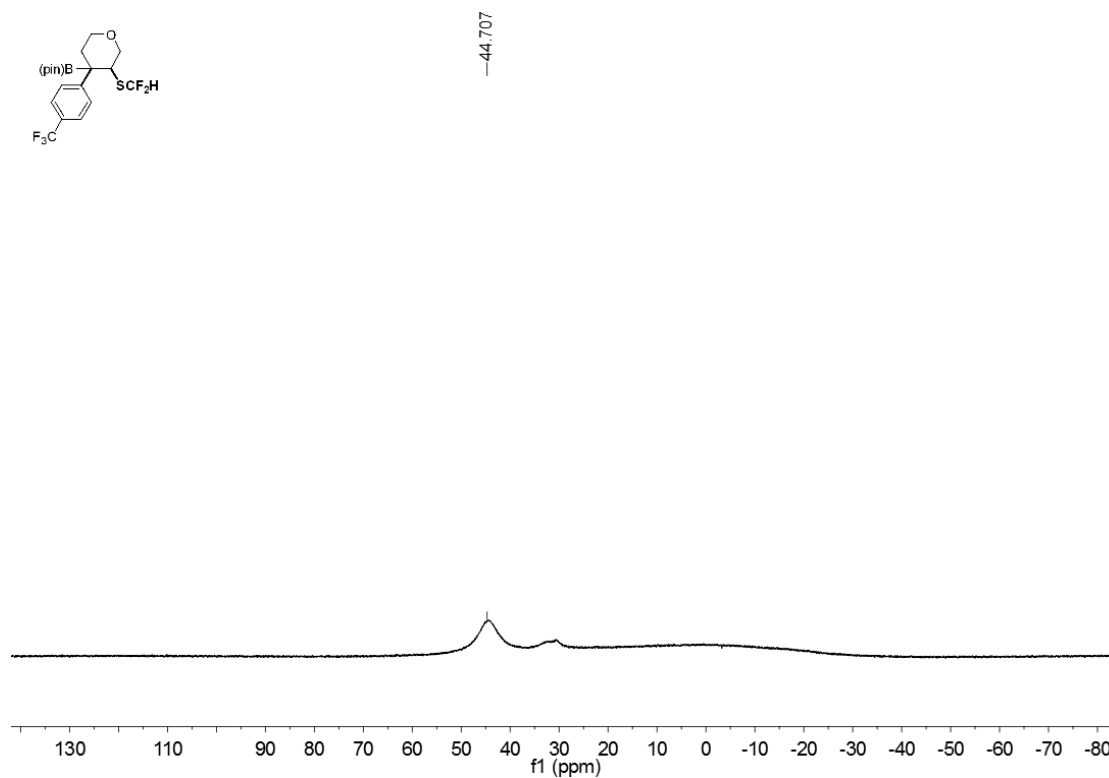

**<sup>1</sup>H NMR (400 MHz, CDCl<sub>3</sub>) spectrum of  
(±)-2-((3*R*,4*R*)-3-(difluoromethylthio)-4-(naphthalen-2-yl)tetrahydro-2*H*-pyran-4-yl)-4,4,5,5-tetramethyl-1,3,2-dioxaborolane 3h**

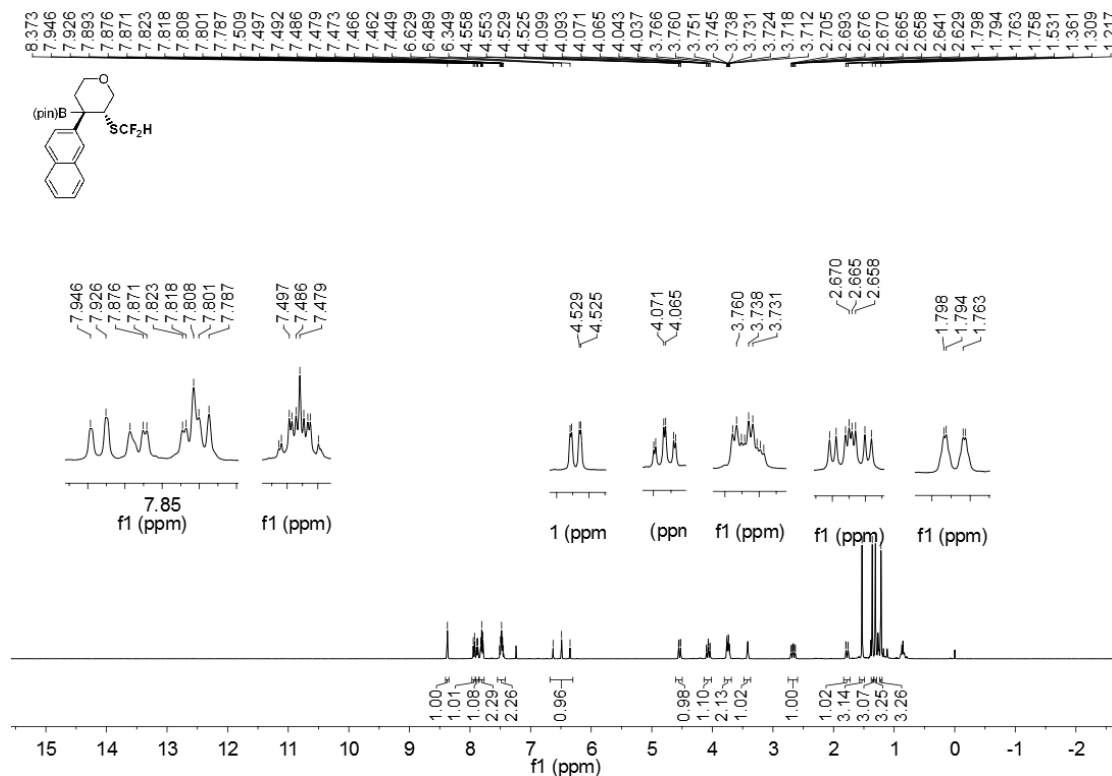

**<sup>13</sup>C NMR (101 MHz, CDCl<sub>3</sub>) spectrum of  
(±)-2-((3*R*,4*R*)-3-(difluoromethylthio)-4-(naphthalen-2-yl)tetrahydro-2*H*-pyran-4-yl)-4,4,5,5-tetramethyl-1,3,2-dioxaborolane 3h**

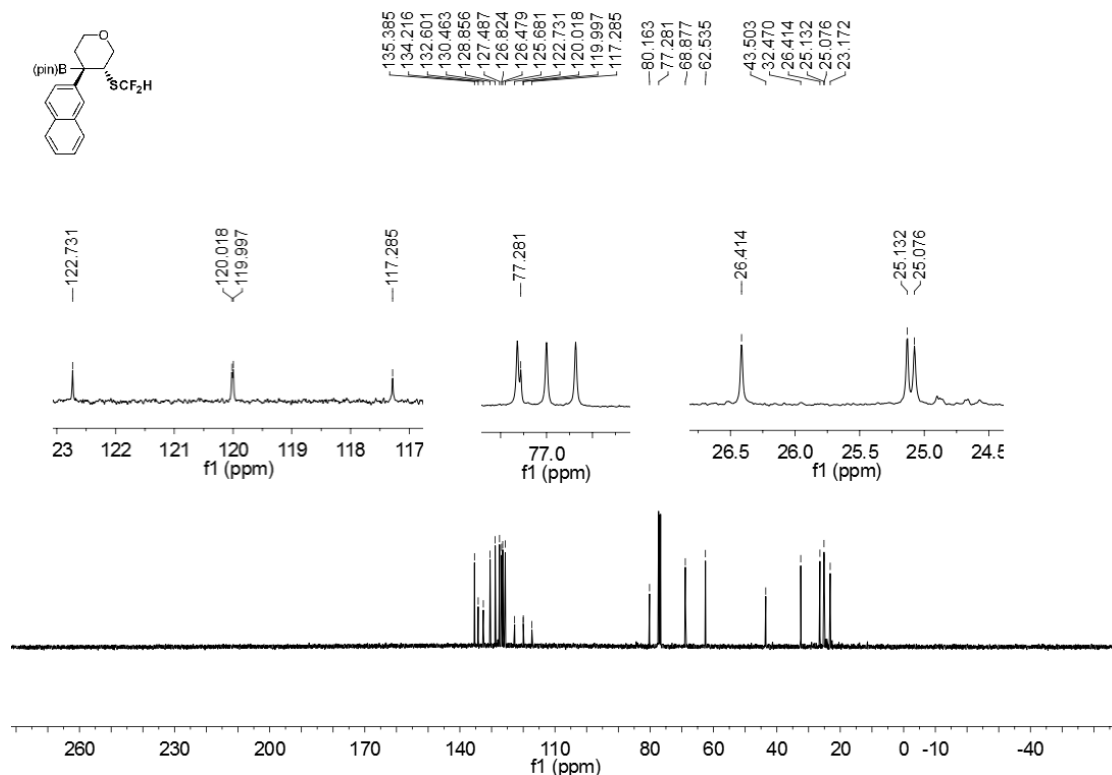

**$^{19}\text{F}$  NMR (376 MHz,  $\text{CDCl}_3$ ) spectrum of  
(±)-2-((3*R*,4*R*)-3-(difluoromethylthio)-4-(naphthalen-2-yl)tetrahydro-2*H*-pyran-4-yl)-4,4,5,5-tetramethyl-1,3,2-dioxaborolane 3h**

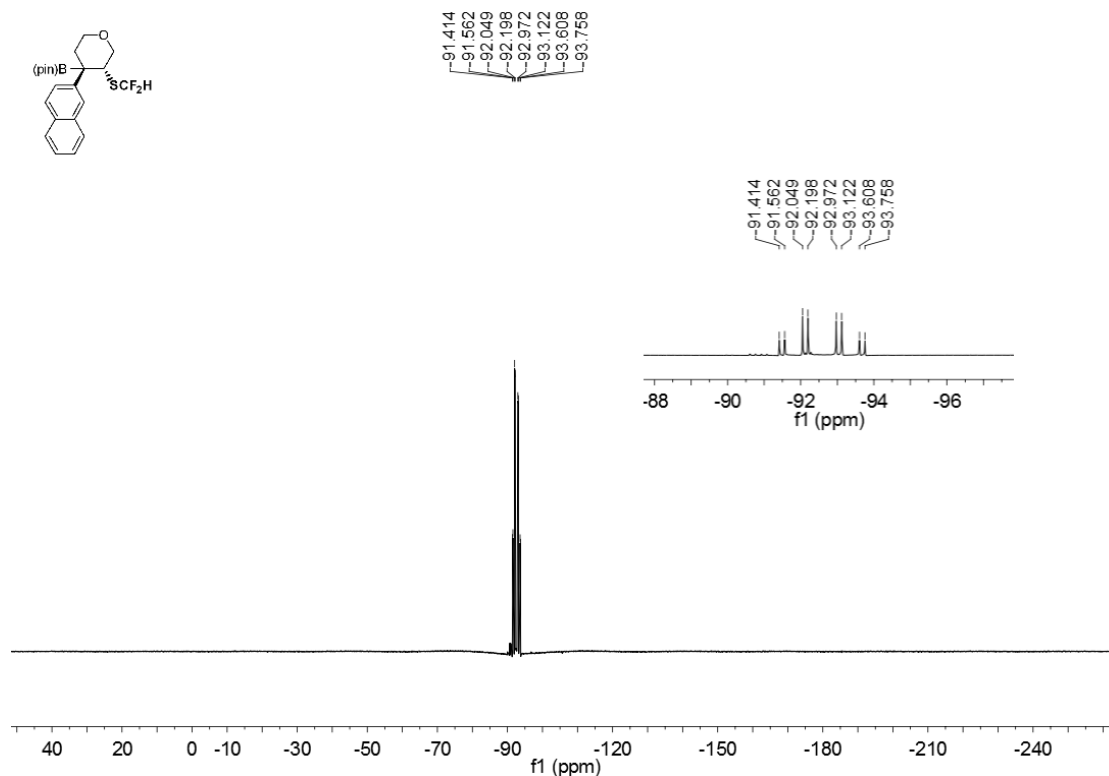

**$^{11}\text{B}$  NMR (128 MHz,  $\text{CD}_3\text{Cl}_3$ ) spectrum of  
(±)-2-((3*R*,4*R*)-3-(difluoromethylthio)-4-(naphthalen-2-yl)tetrahydro-2*H*-pyran-4-yl)-4,4,5,5-tetramethyl-1,3,2-dioxaborolane 3h**

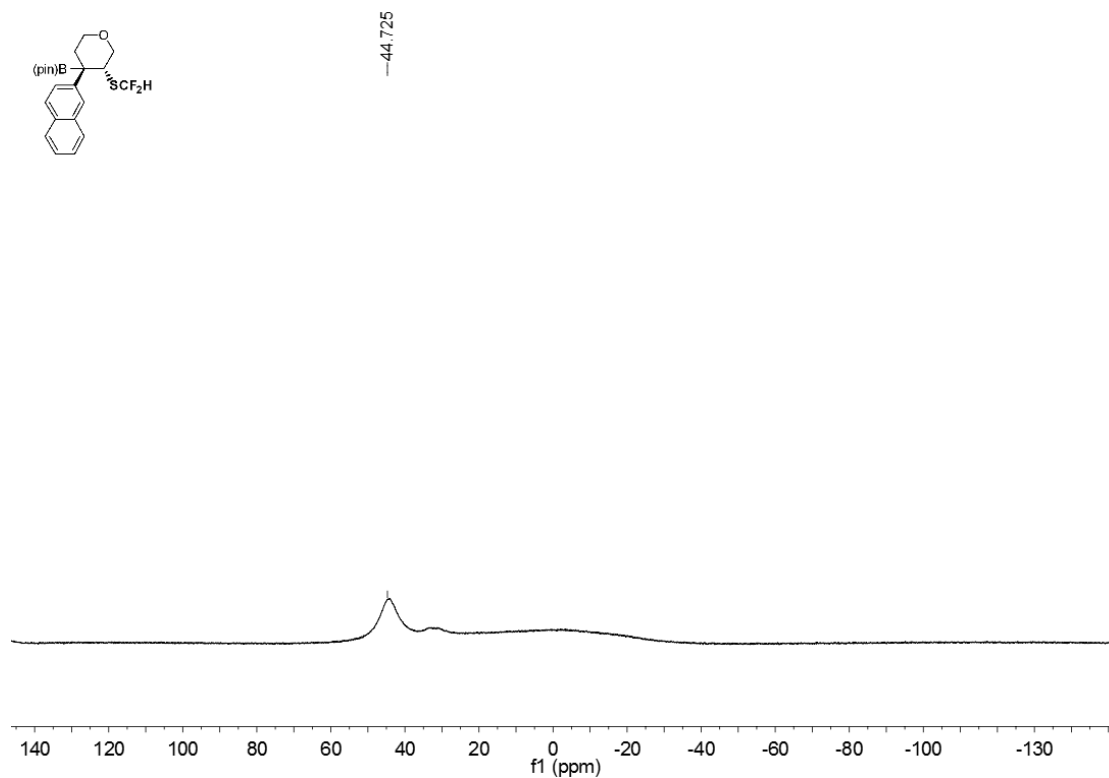



**<sup>1</sup>H NMR (400 MHz, CDCl<sub>3</sub>) spectrum of  
(±)-2-((3*R*,4*R*)-4-(3,5-di-*tert*-butylphenyl)-3-(difluoromethylthio)tetrahydro-2*H*-p  
yran-4-yl)-4,4,5,5-tetramethyl-1,3,2-dioxaborolane 3i**

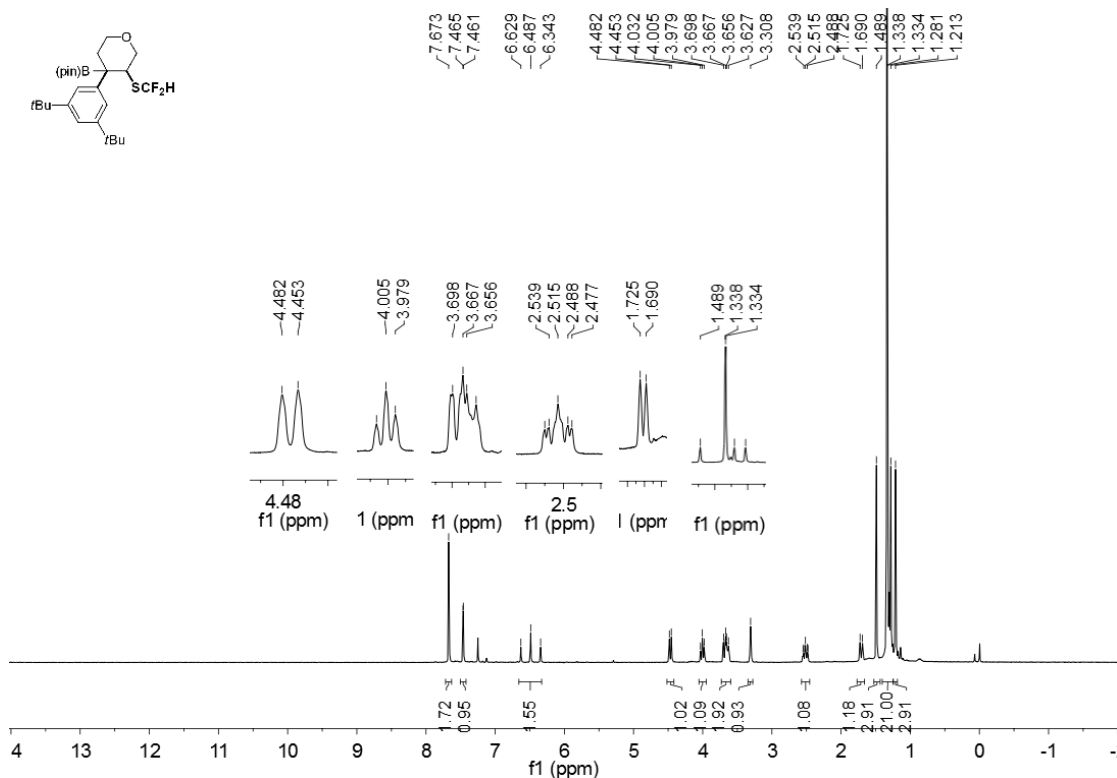

**<sup>13</sup>C NMR (101 MHz, CDCl<sub>3</sub>) spectrum of  
(±)-2-((3*R*,4*R*)-4-(3,5-di-*tert*-butylphenyl)-3-(difluoromethylthio)tetrahydro-2*H*-p  
yran-4-yl)-4,4,5,5-tetramethyl-1,3,2-dioxaborolane 3i**

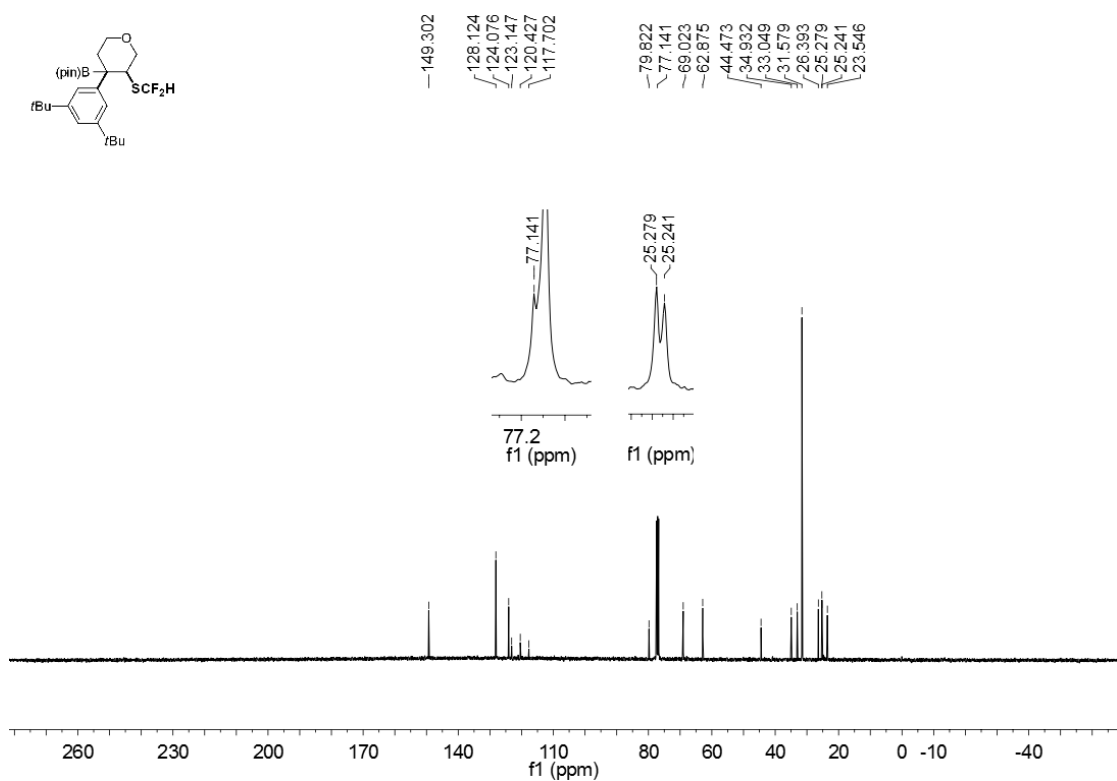

**$^{19}\text{F}$  NMR (376 MHz,  $\text{CDCl}_3$ ) spectrum of  
( $\pm$ )-2-((3*R*,4*R*)-4-(3,5-di-*tert*-butylphenyl)-3-(difluoromethylthio)tetrahydro-2*H*-p  
yran-4-yl)-4,4,5,5-tetramethyl-1,3,2-dioxaborolane 3i**

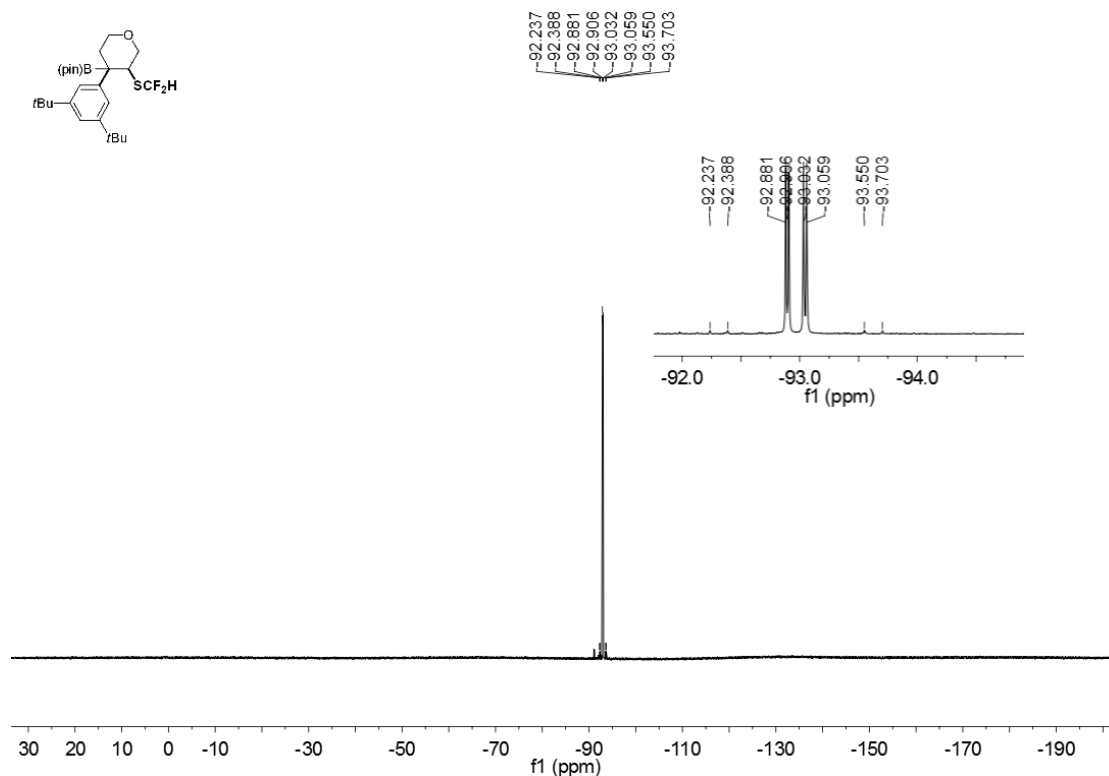

**$^{11}\text{B}$  NMR (128 MHz,  $\text{CD}_3\text{Cl}_3$ ) spectrum of  
( $\pm$ )-2-((3*R*,4*R*)-4-(3,5-di-*tert*-butylphenyl)-3-(difluoromethylthio)tetrahydro-2*H*-p  
yran-4-yl)-4,4,5,5-tetramethyl-1,3,2-dioxaborolane 3i**

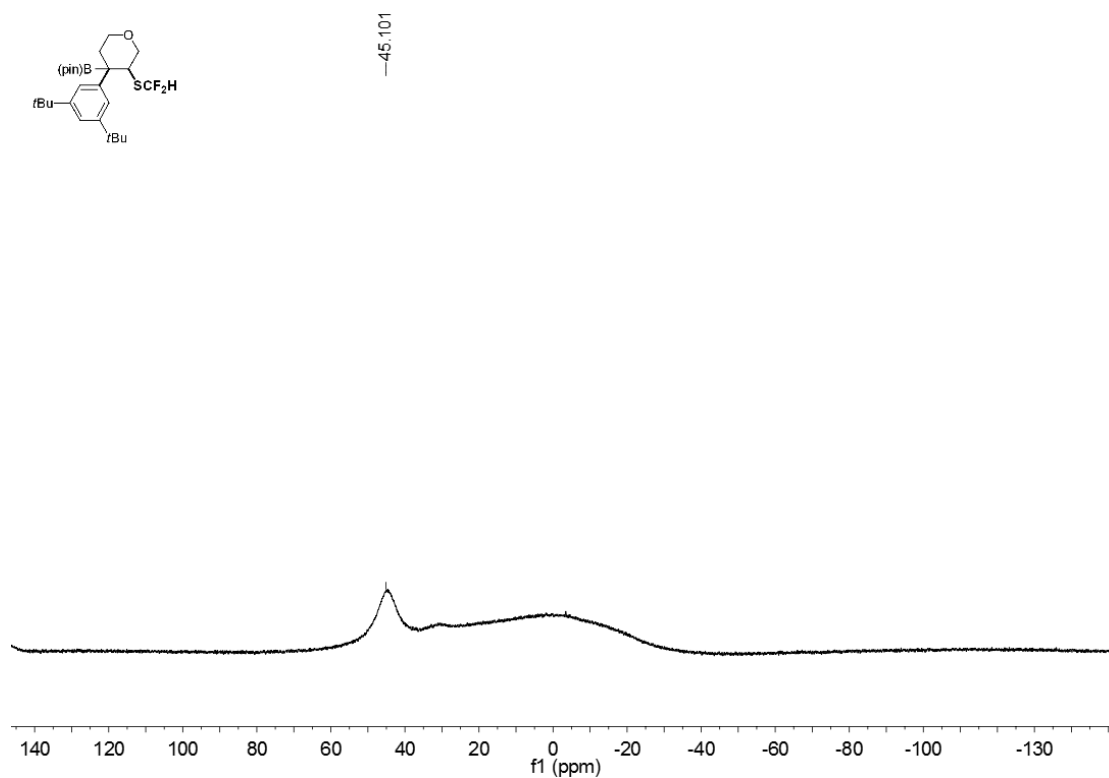

**<sup>1</sup>H NMR (400 MHz, CDCl<sub>3</sub>) spectrum of  
(±)-2-((3*R*,4*S*)-4-butyl-3-(difluoromethylthio)tetrahydro-2*H*-pyran-4-yl)-4,4,5,5-tetramethyl-1,3,2-dioxaborolane **3j****

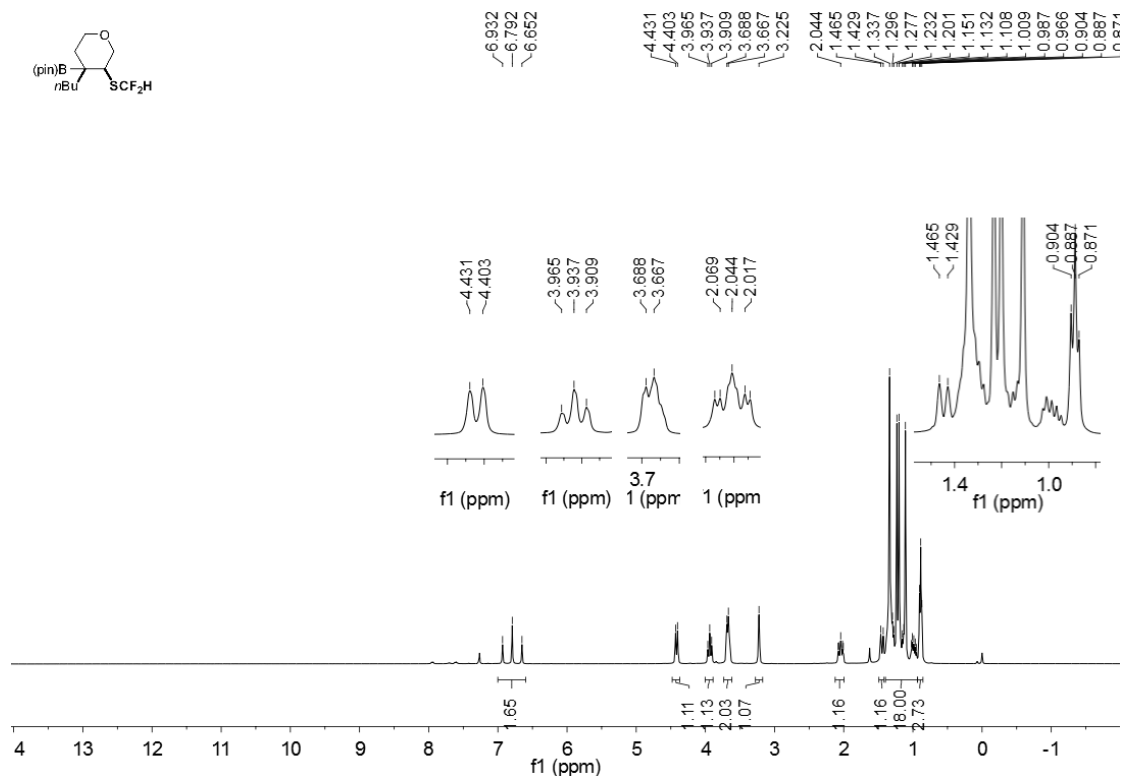

**<sup>13</sup>C NMR (101 MHz, CDCl<sub>3</sub>) spectrum of  
(±)-2-((3*R*,4*S*)-4-butyl-3-(difluoromethylthio)tetrahydro-2*H*-pyran-4-yl)-4,4,5,5-tetramethyl-1,3,2-dioxaborolane **3j****

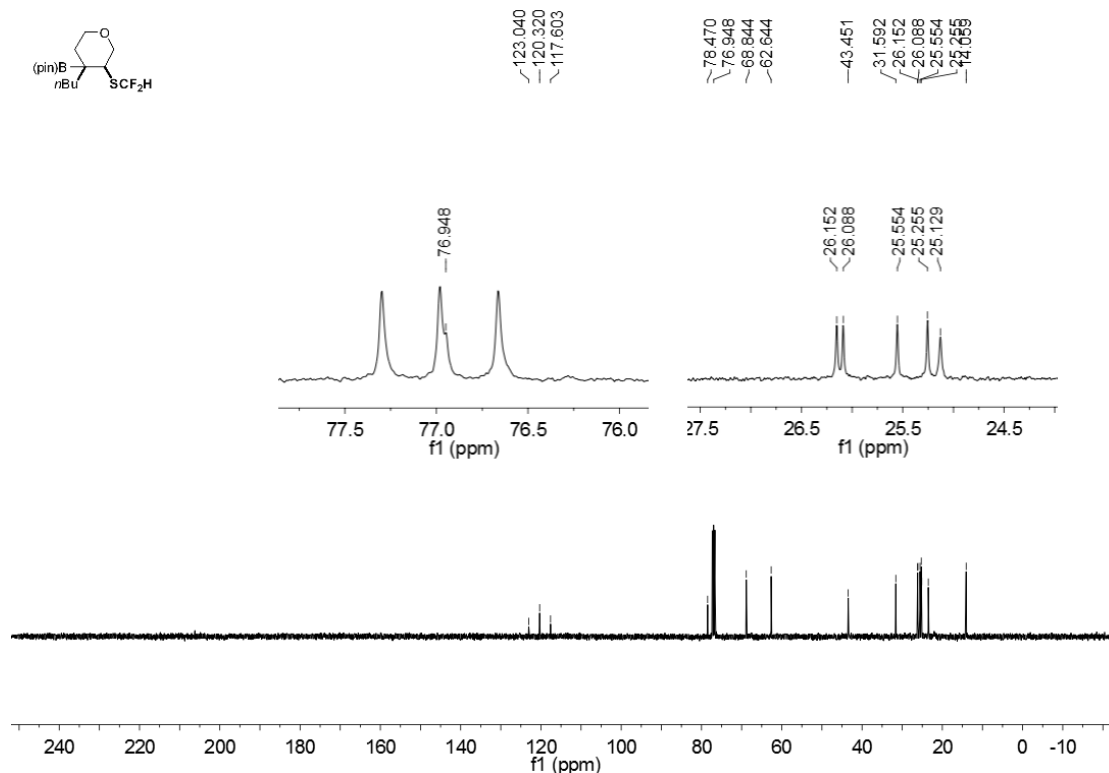

**$^{19}\text{F}$  NMR (376 MHz,  $\text{CDCl}_3$ ) spectrum of  
(±)-2-((3*R*,4*S*)-4-butyl-3-(difluoromethylthio)tetrahydro-2*H*-pyran-4-yl)-4,4,5,5-tetramethyl-1,3,2-dioxaborolane 3j**

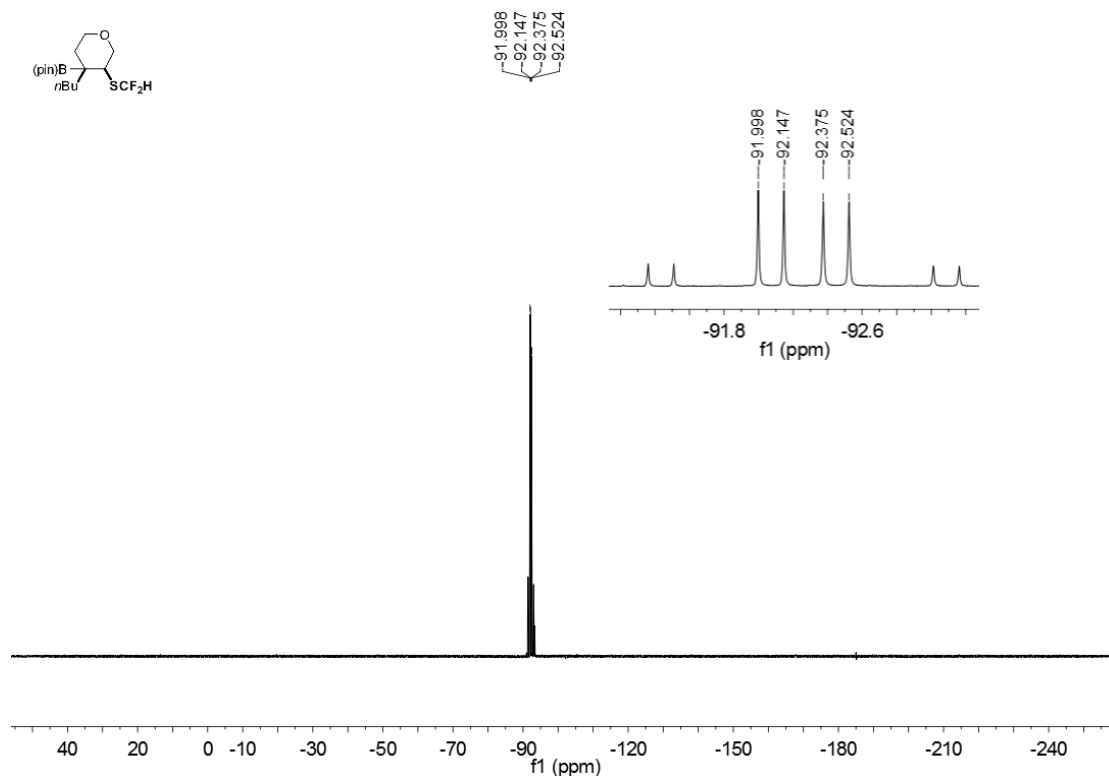

**$^{11}\text{B}$  NMR (128 MHz,  $\text{CD}_3\text{Cl}_3$ ) spectrum of  
(±)-2-((3*R*,4*S*)-4-butyl-3-(difluoromethylthio)tetrahydro-2*H*-pyran-4-yl)-4,4,5,5-tetramethyl-1,3,2-dioxaborolane 3j**

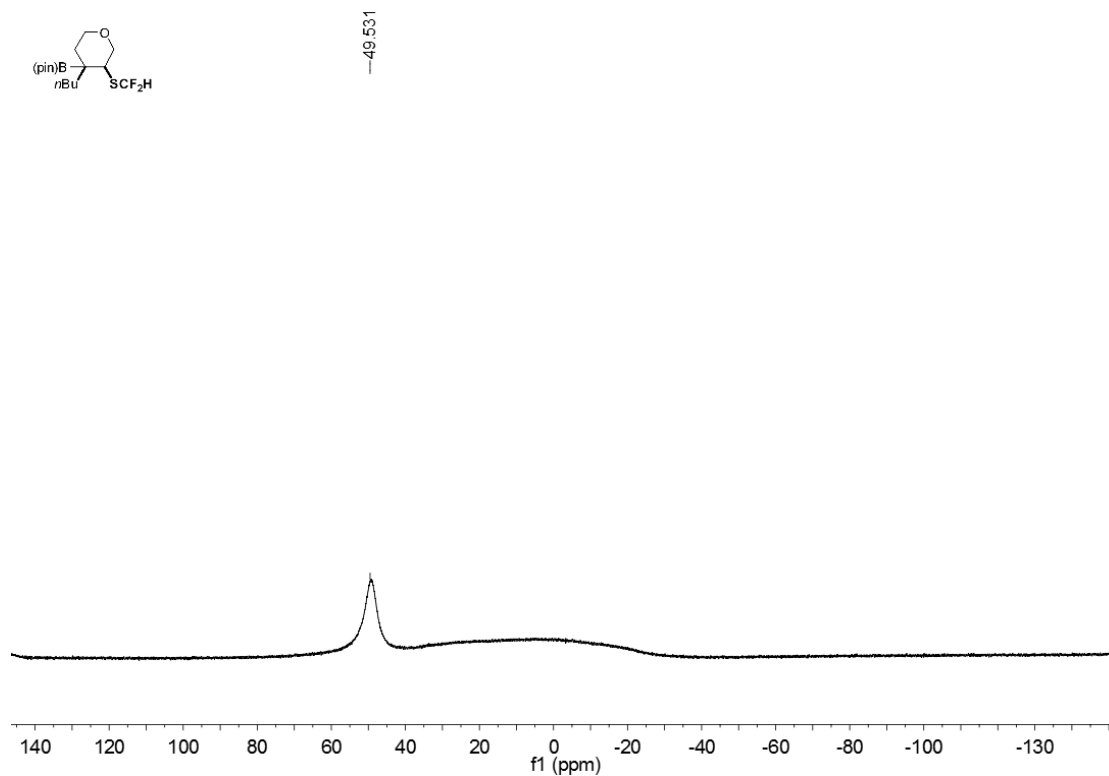

**$^1\text{H}$  NMR (400 MHz,  $\text{CDCl}_3$ ) spectrum of  
 ( $\pm$ )-5-((3*R*,4*R*)-3-(difluoromethylthio)-4-(4,4,5,5-tetramethyl-1,3,2-dioxaborolan-2-yl)tetrahydro-2*H*-pyran-4-yl)-1-methyl-1*H*-indole 3k**

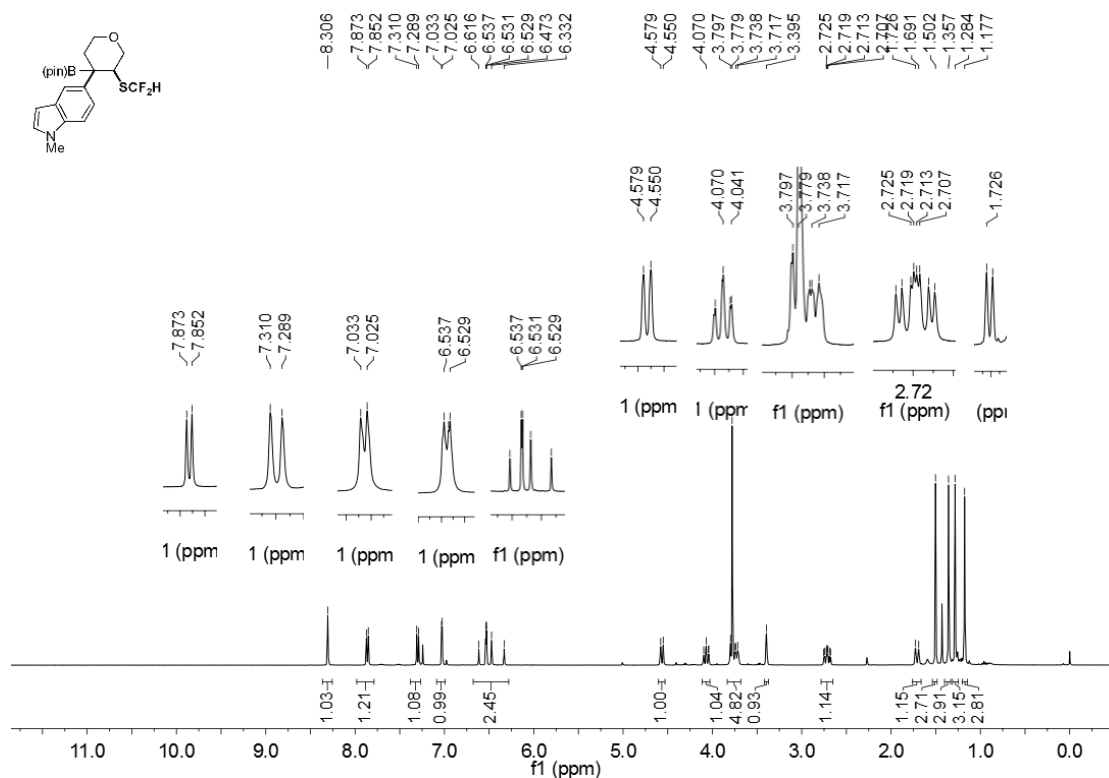

**$^{13}\text{C}$  NMR (101 MHz,  $\text{CDCl}_3$ ) spectrum of  
 ( $\pm$ )-5-((3*R*,4*R*)-3-(difluoromethylthio)-4-(4,4,5,5-tetramethyl-1,3,2-dioxaborolan-2-yl)tetrahydro-2*H*-pyran-4-yl)-1-methyl-1*H*-indole 3k**

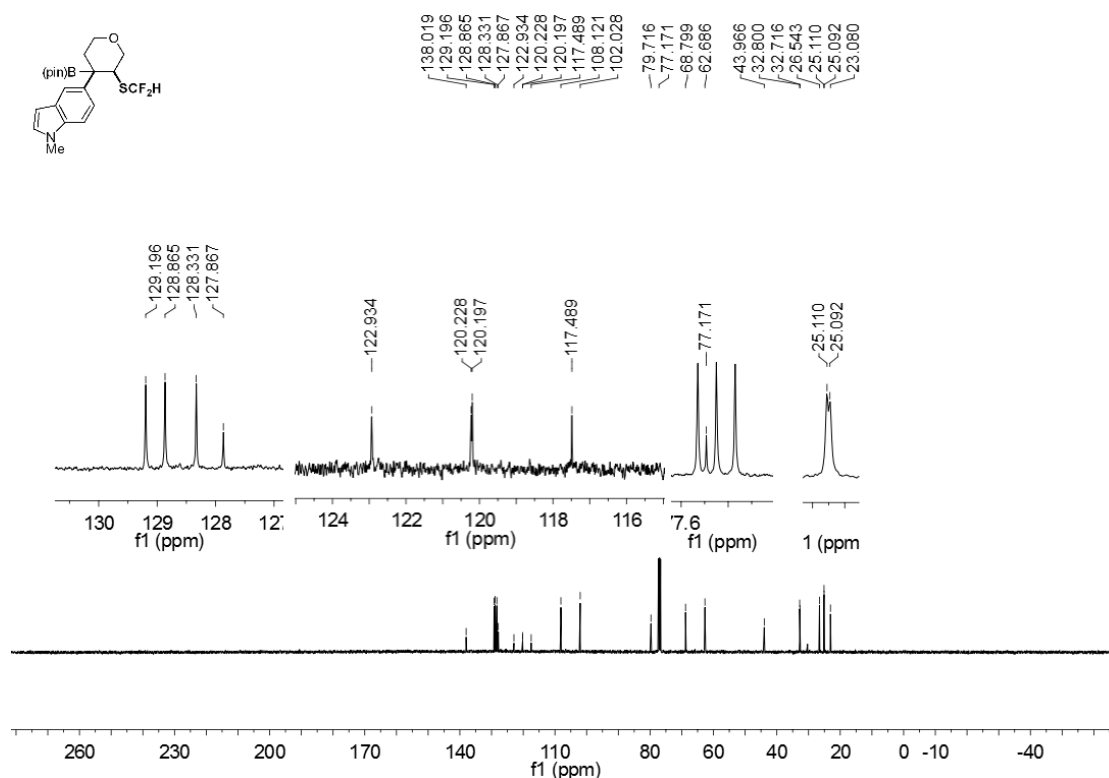

**$^{19}\text{F}$  NMR (376 MHz,  $\text{CDCl}_3$ ) spectrum of  
(±)-5-((3*R*,4*R*)-3-(difluoromethylthio)-4-(4,4,5,5-tetramethyl-1,3,2-dioxaborolan-2-yl)tetrahydro-2*H*-pyran-4-yl)-1-methyl-1*H*-indole 3k**

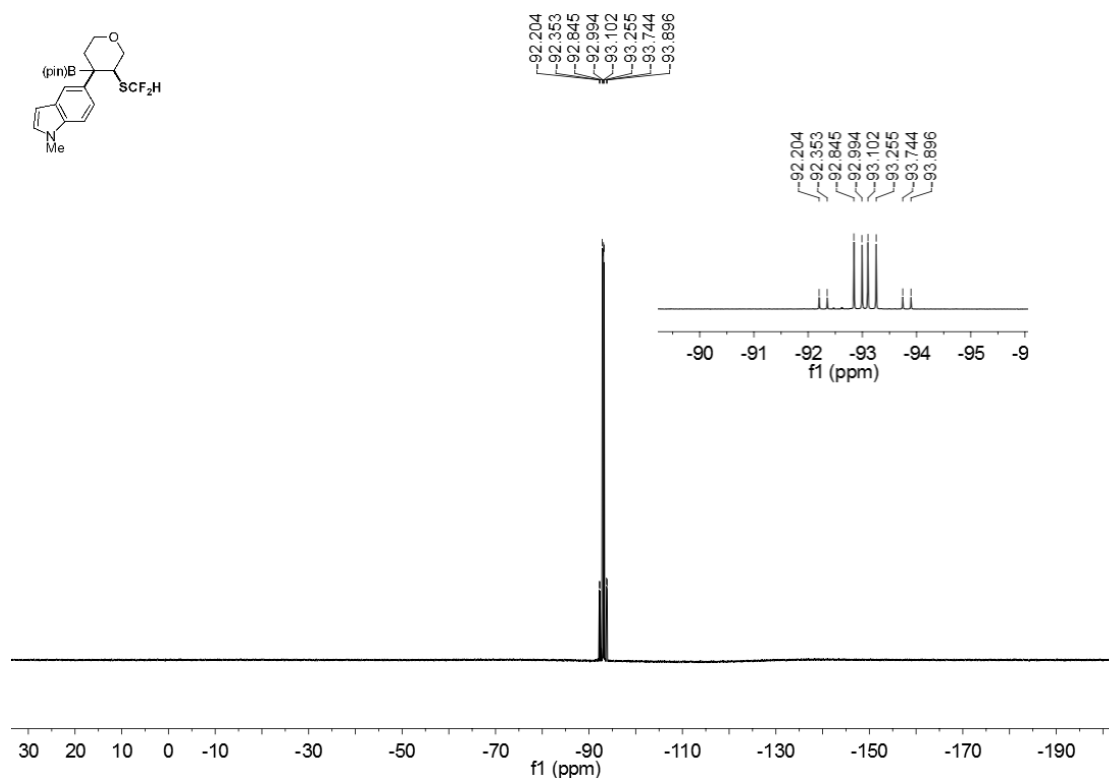

**$^{11}\text{B}$  NMR (128 MHz,  $\text{CD}_3\text{Cl}_3$ ) spectrum of  
(±)-5-((3*R*,4*R*)-3-(difluoromethylthio)-4-(4,4,5,5-tetramethyl-1,3,2-dioxaborolan-2-yl)tetrahydro-2*H*-pyran-4-yl)-1-methyl-1*H*-indole 3k**

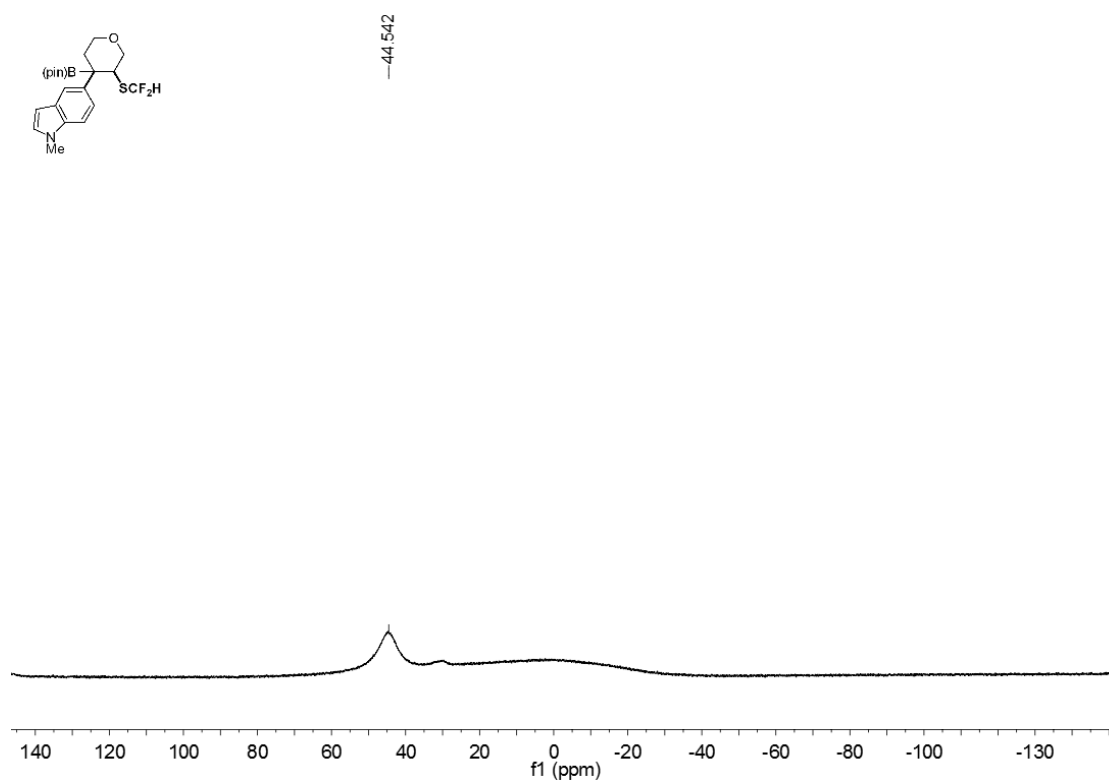

**<sup>1</sup>H NMR (400 MHz, CDCl<sub>3</sub>) spectrum of  
(±)-2-((3*R*,4*R*)-4-(benzo[*b*]thiophen-5-yl)-3-(difluoromethylthio)tetrahydro-2*H*-p  
yran-4-yl)-4,4,5,5-tetramethyl-1,3,2-dioxaborolane 3l**

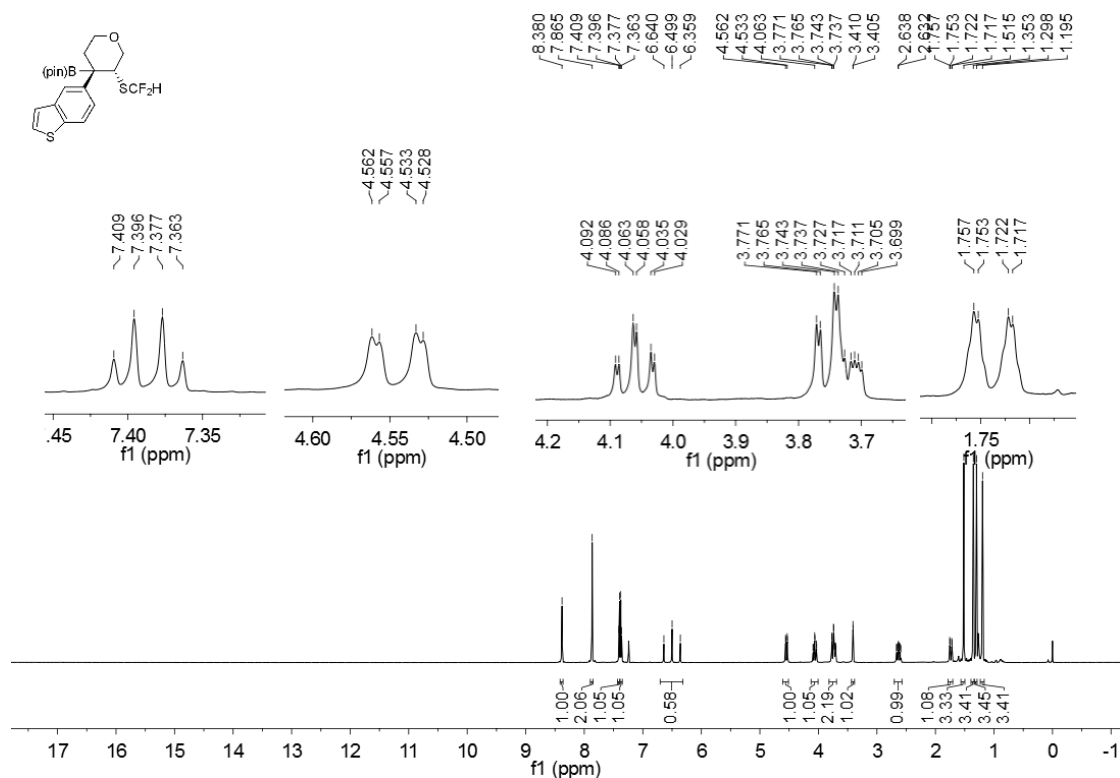

**<sup>13</sup>C NMR (101 MHz, CDCl<sub>3</sub>) spectrum of  
(±)-2-((3*R*,4*R*)-4-(benzo[*b*]thiophen-5-yl)-3-(difluoromethylthio)tetrahydro-2*H*-p  
yran-4-yl)-4,4,5,5-tetramethyl-1,3,2-dioxaborolane 3l**

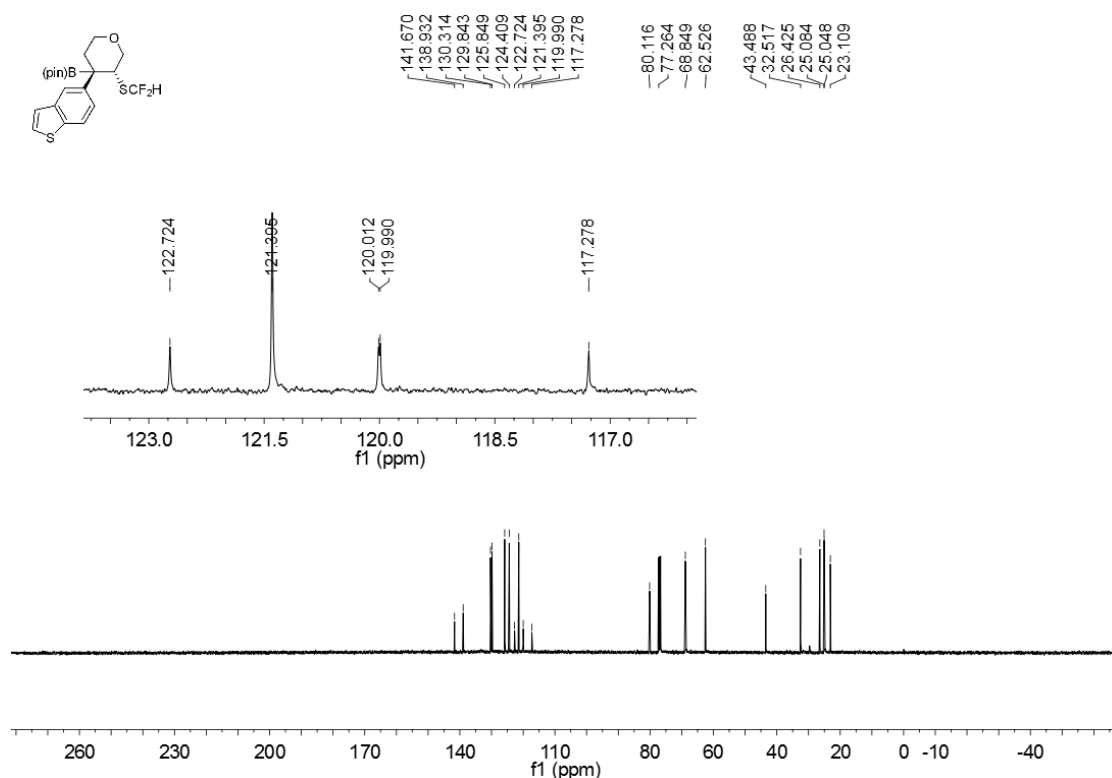

**$^{19}\text{F}$  NMR (376 MHz,  $\text{CDCl}_3$ ) spectrum of  
( $\pm$ )-2-((3*R*,4*R*)-4-(benzo[*b*]thiophen-5-yl)-3-(difluoromethylthio)tetrahydro-2*H*-p  
yran-4-yl)-4,4,5,5-tetramethyl-1,3,2-dioxaborolane 3l**

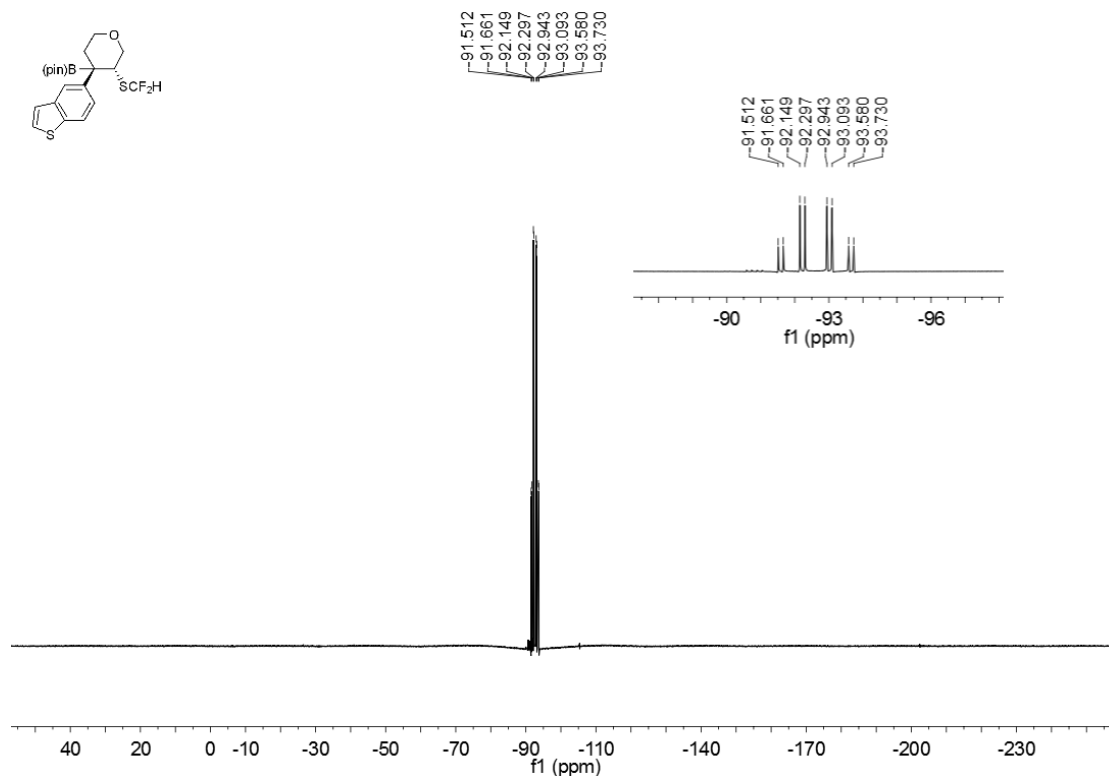

**$^{11}\text{B}$  NMR (128 MHz,  $\text{CD}_3\text{Cl}_3$ ) spectrum of  
( $\pm$ )-2-((3*R*,4*R*)-4-(benzo[*b*]thiophen-5-yl)-3-(difluoromethylthio)tetrahydro-2*H*-p  
yran-4-yl)-4,4,5,5-tetramethyl-1,3,2-dioxaborolane 3l**

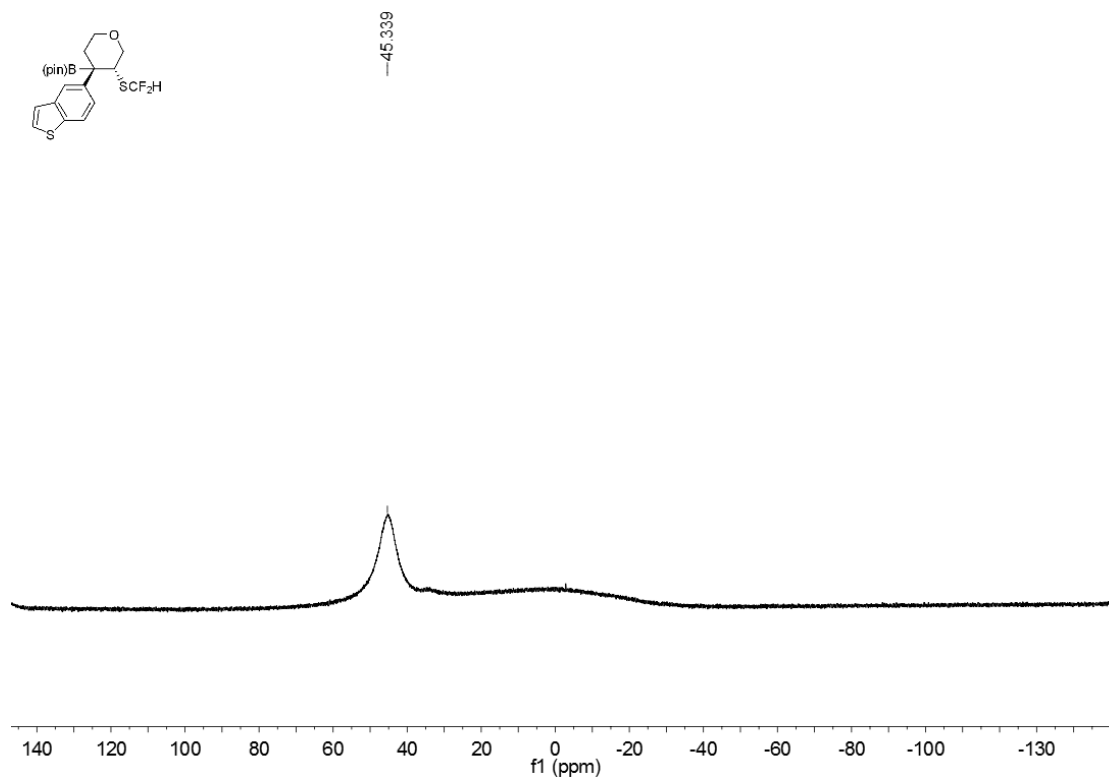



**<sup>1</sup>H NMR (400 MHz, CDCl<sub>3</sub>) spectrum of  
(±)-2-((3*R*,4*R*)-4-(benzofuran-5-yl)-3-(difluoromethylthio)tetrahydro-2*H*-pyran-4-yl)-4,4,5,5-tetramethyl-1,3,2-dioxaborolane 3m**

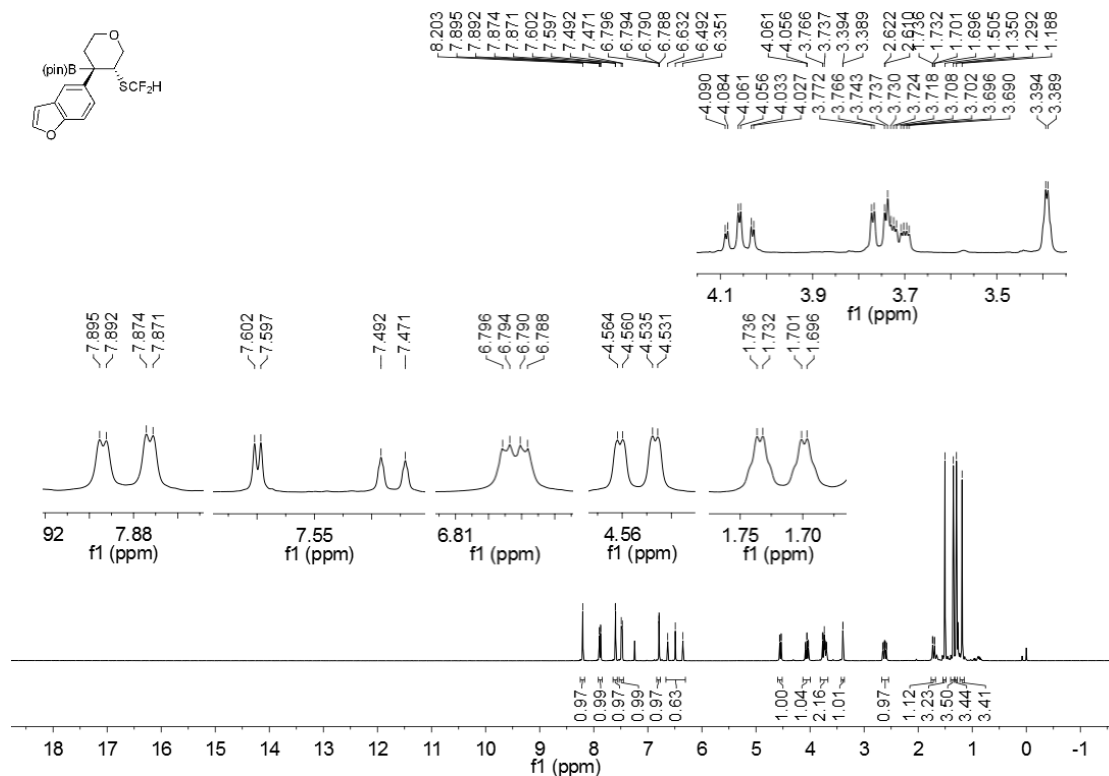

**<sup>13</sup>C NMR (101 MHz, CDCl<sub>3</sub>) spectrum of  
(±)-2-((3*R*,4*R*)-4-(benzofuran-5-yl)-3-(difluoromethylthio)tetrahydro-2*H*-pyran-4-yl)-4,4,5,5-tetramethyl-1,3,2-dioxaborolane 3m**

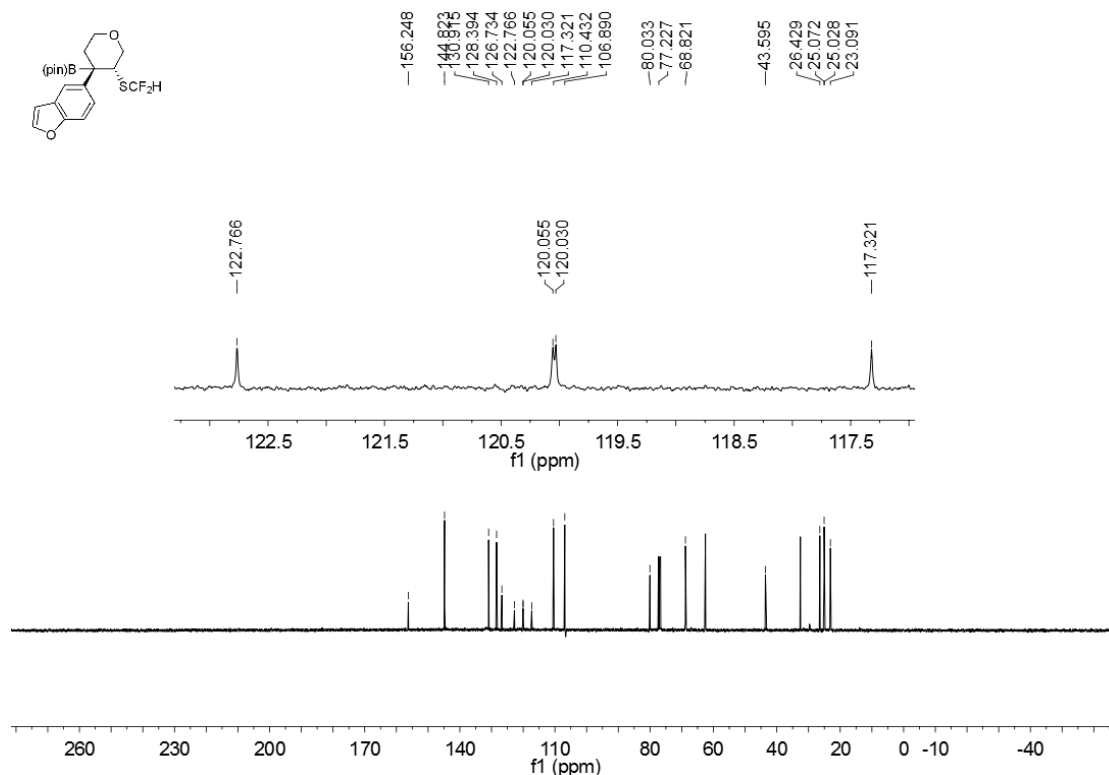

**$^{19}\text{F}$  NMR (376 MHz,  $\text{CDCl}_3$ ) spectrum of  
( $\pm$ )-2-((3*R*,4*R*)-4-(benzofuran-5-yl)-3-(difluoromethylthio)tetrahydro-2*H*-pyran-4-yl)-4,4,5,5-tetramethyl-1,3,2-dioxaborolane 3m**

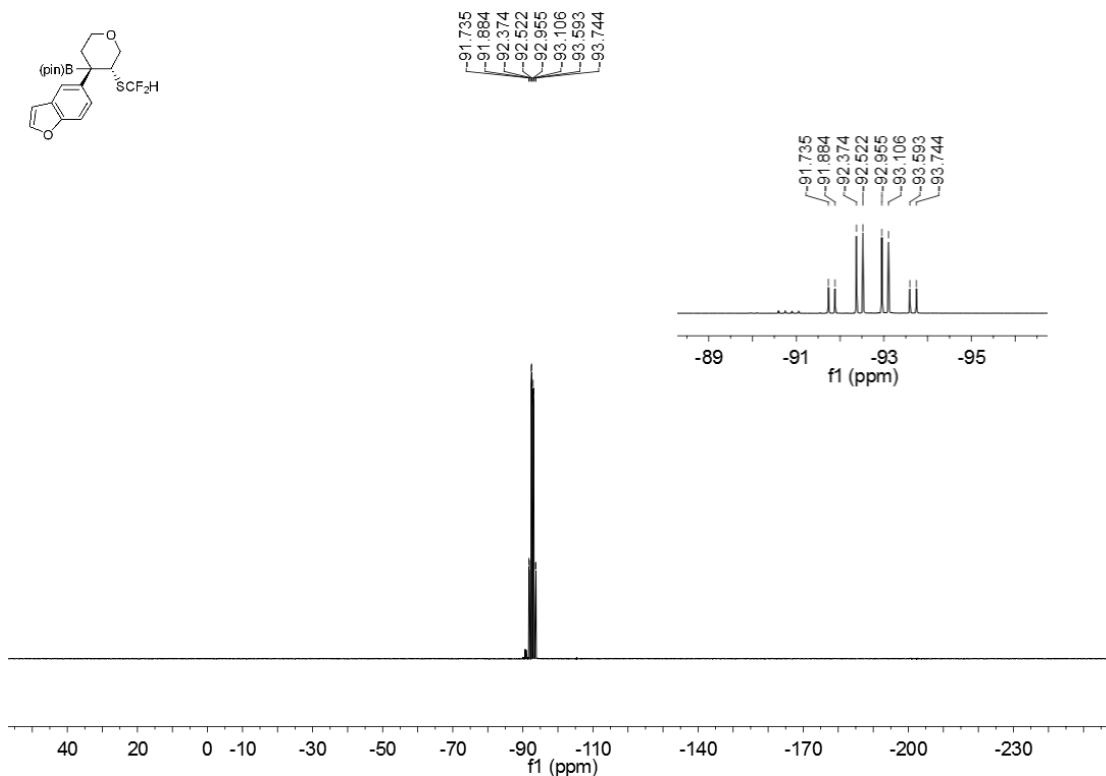

**$^{11}\text{B}$  NMR (128 MHz,  $\text{CD}_3\text{Cl}_3$ ) spectrum of  
( $\pm$ )-2-((3*R*,4*R*)-4-(benzofuran-5-yl)-3-(difluoromethylthio)tetrahydro-2*H*-pyran-4-yl)-4,4,5,5-tetramethyl-1,3,2-dioxaborolane 3m**

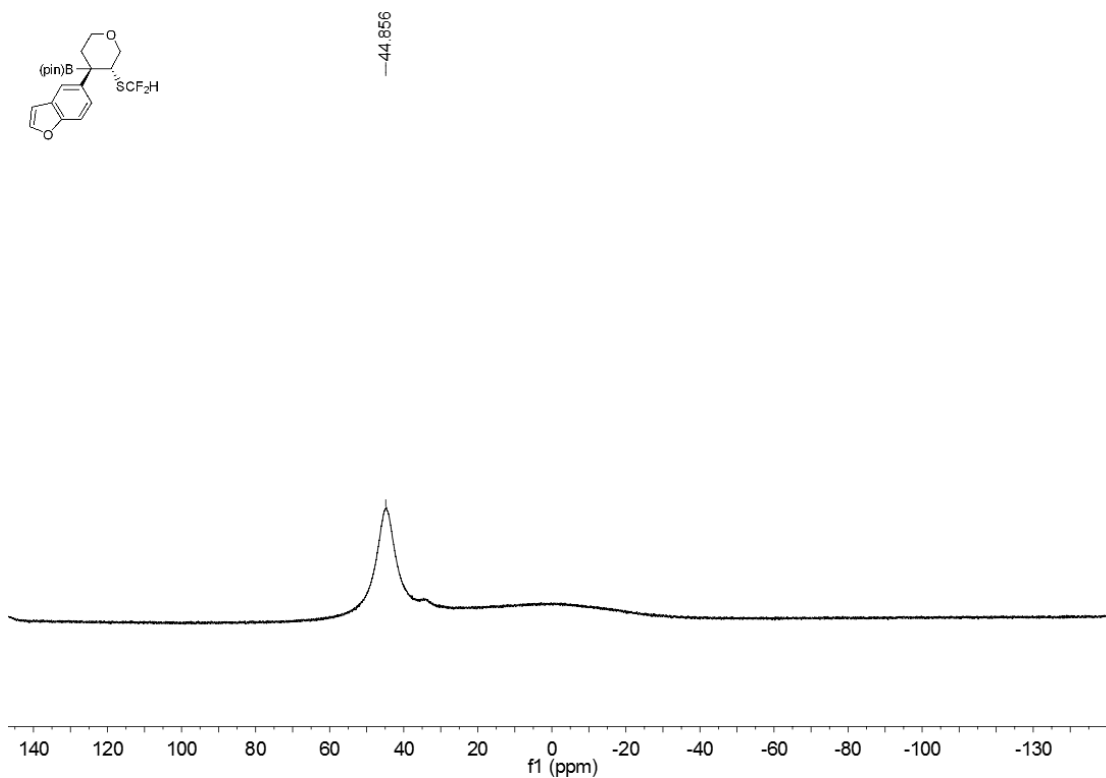

**<sup>1</sup>H NMR (400 MHz, CDCl<sub>3</sub>) spectrum of  
(±)-2-((3*R*,4*R*)-3-(difluoromethylthio)-4-phenyltetrahydro-2*H*-thiopyran-4-yl)-4,4,5,5-tetramethyl-1,3,2-dioxaborolane **3n****

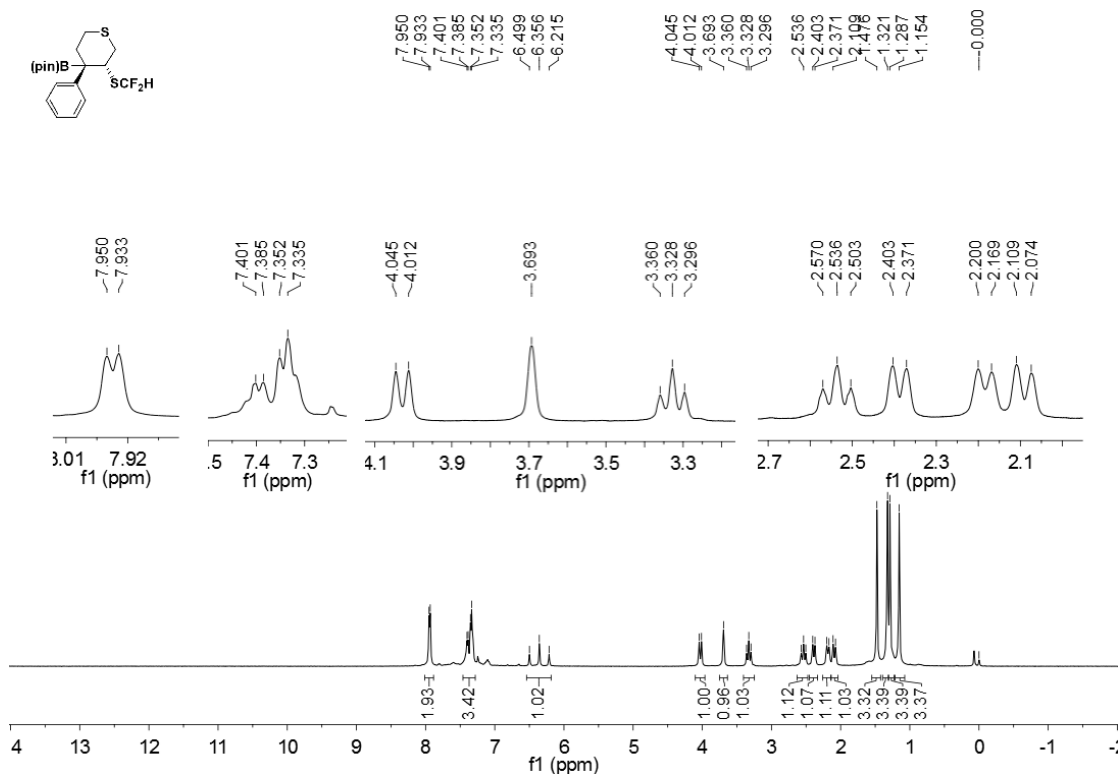

**<sup>13</sup>C NMR (101 MHz, CDCl<sub>3</sub>) spectrum of  
(±)-2-((3*R*,4*R*)-3-(difluoromethylthio)-4-phenyltetrahydro-2*H*-thiopyran-4-yl)-4,4,5,5-tetramethyl-1,3,2-dioxaborolane **3n****

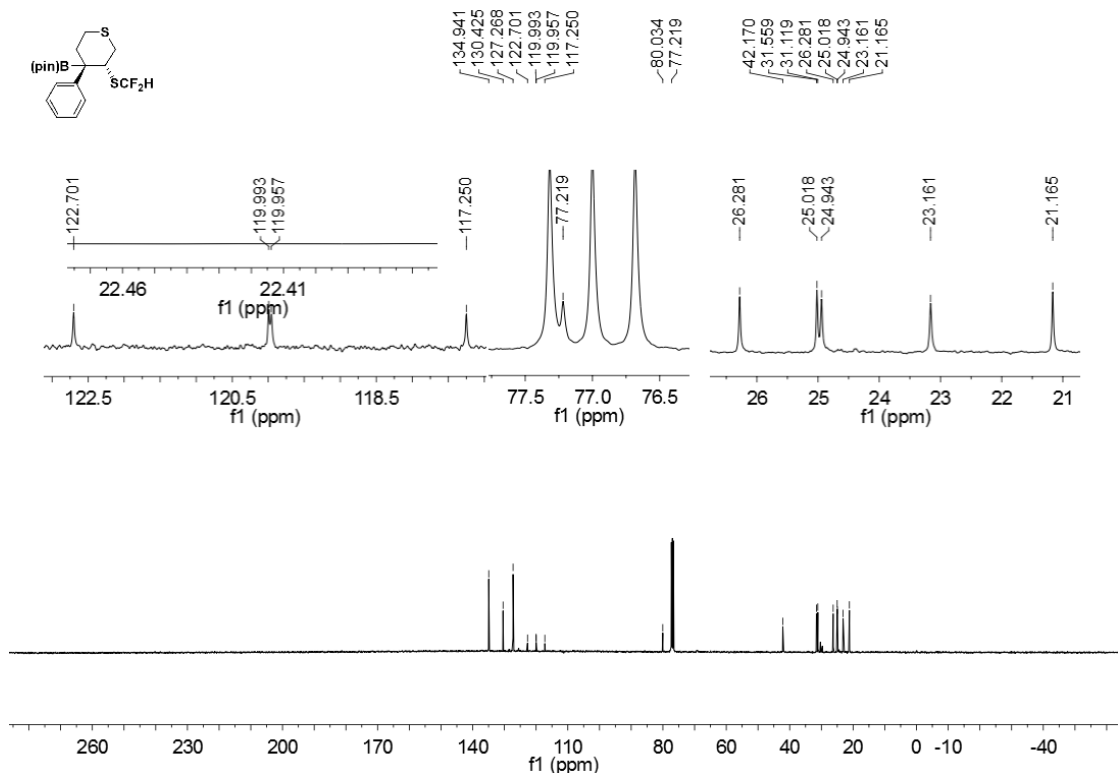

**$^{19}\text{F}$  NMR (376 MHz,  $\text{CDCl}_3$ ) spectrum of  
( $\pm$ )-2-((3*R*,4*R*)-3-(difluoromethylthio)-4-phenyltetrahydro-2*H*-thiopyran-4-yl)-4,4,5,5-tetramethyl-1,3,2-dioxaborolane 3n**

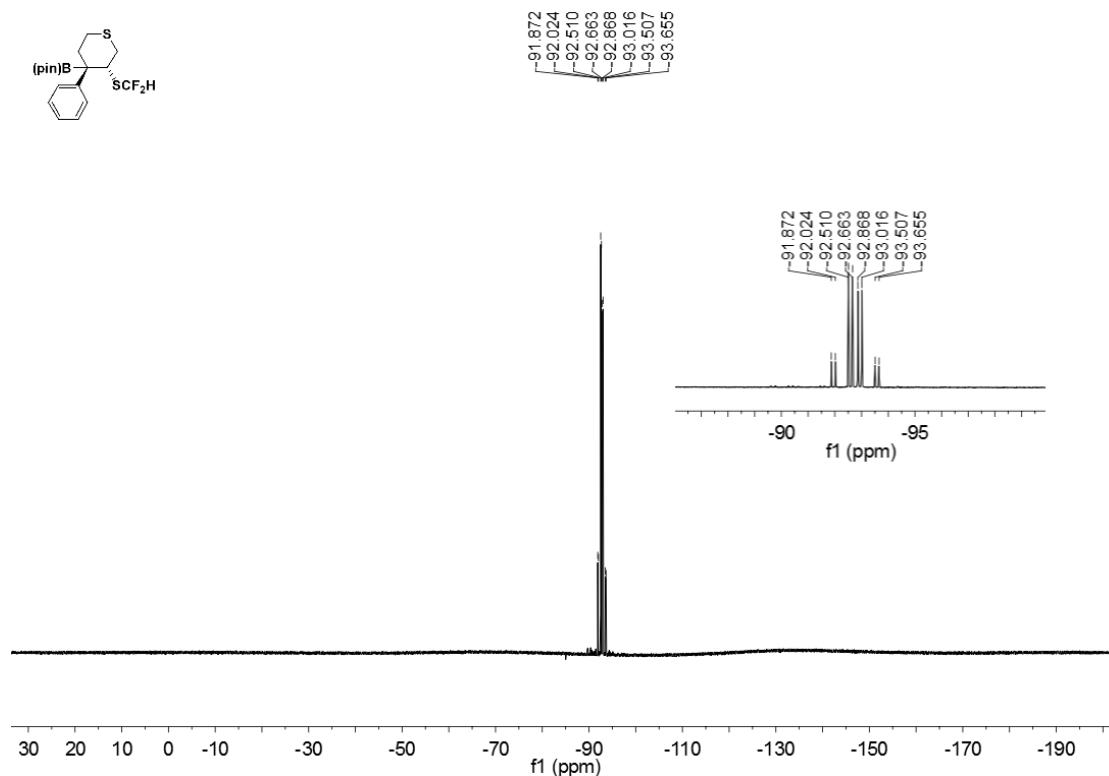

**$^{11}\text{B}$  NMR (128 MHz,  $\text{CD}_3\text{Cl}_3$ ) spectrum of  
( $\pm$ )-2-((3*R*,4*R*)-3-(difluoromethylthio)-4-phenyltetrahydro-2*H*-thiopyran-4-yl)-4,4,5,5-tetramethyl-1,3,2-dioxaborolane 3n**

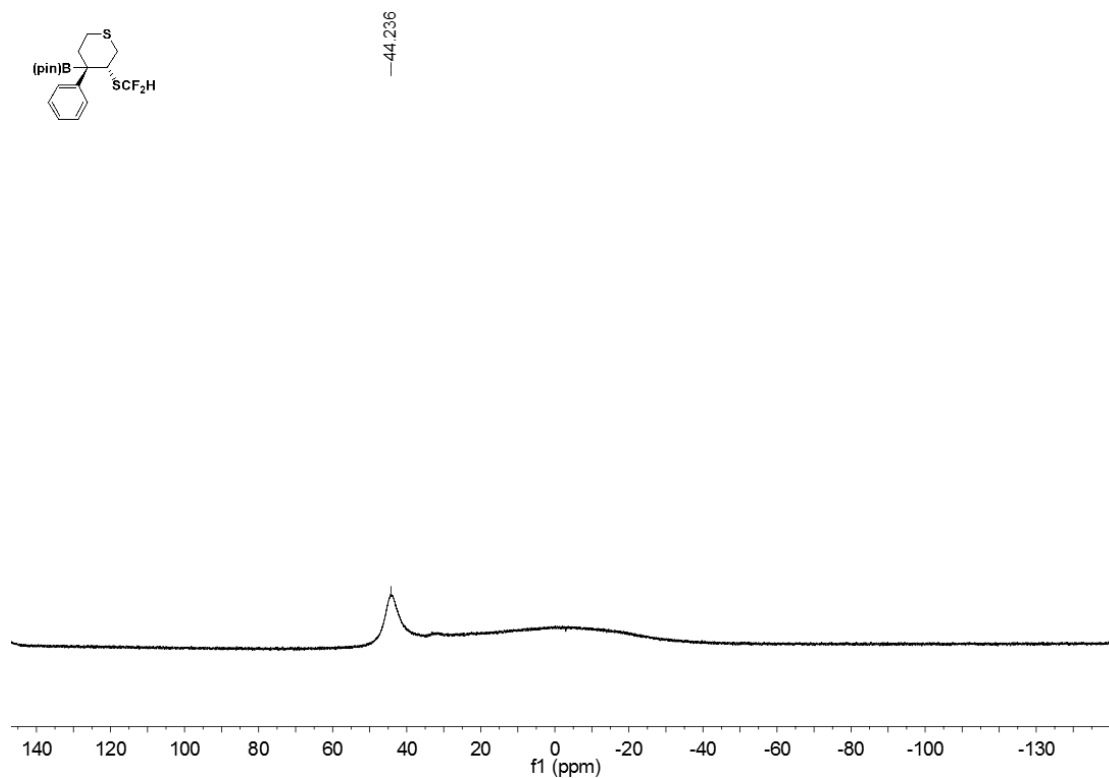

**<sup>1</sup>H NMR (400 MHz, CDCl<sub>3</sub>) spectrum of  
(±)-(3*R*,4*R*)-3-(difluoromethylthio)-4-phenyl-4-(4,4,5,5-tetramethyl-1,3,2-dioxaborolan-2-yl)-1-tosylpiperidine 3o**

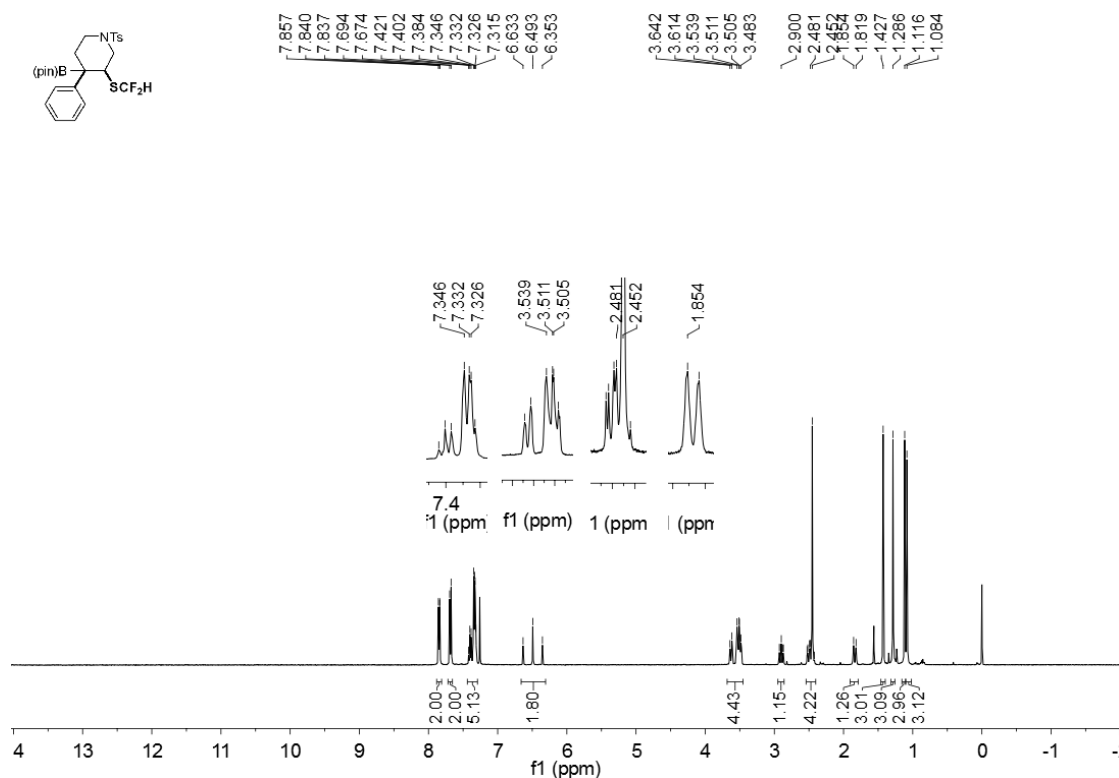

**<sup>13</sup>C NMR (101 MHz, CDCl<sub>3</sub>) spectrum of  
(±)-(3*R*,4*R*)-3-(difluoromethylthio)-4-phenyl-4-(4,4,5,5-tetramethyl-1,3,2-dioxaborolan-2-yl)-1-tosylpiperidine 3o**

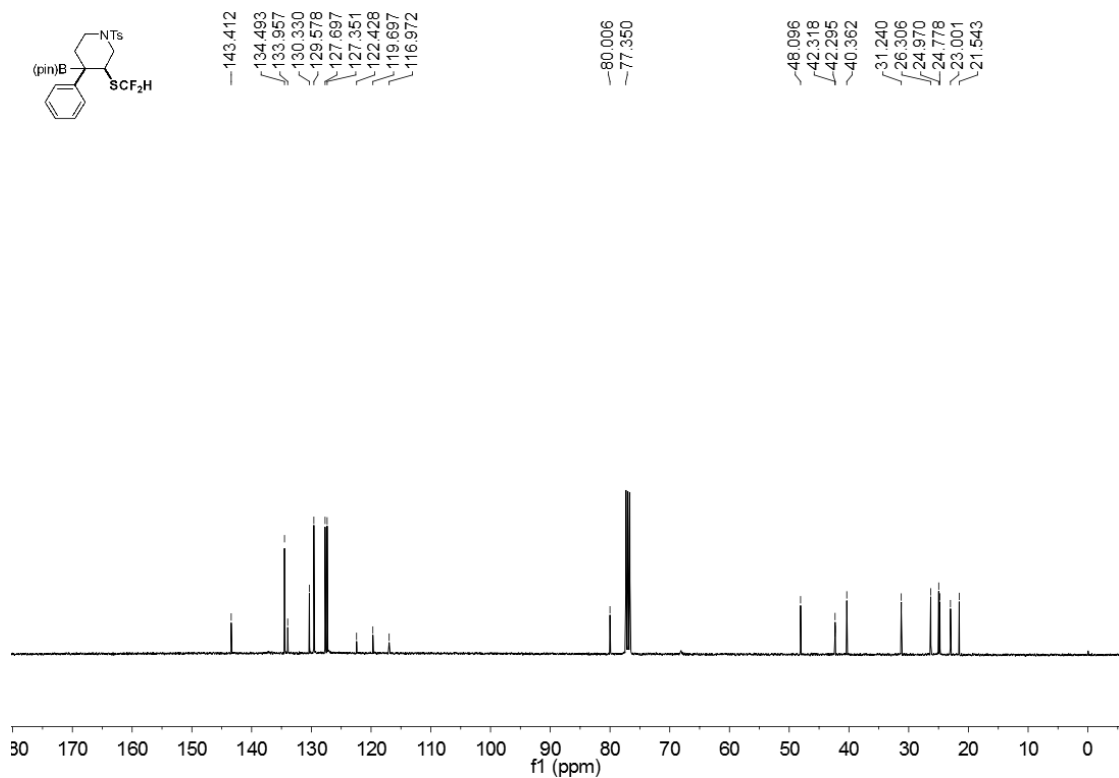

**<sup>19</sup>F NMR (376 MHz, CDCl<sub>3</sub>) spectrum of  
(±)-(3*R*,4*R*)-3-(difluoromethylthio)-4-phenyl-4-(4,4,5,5-tetramethyl-1,3,2-dioxaborolan-2-yl)-1-tosylpiperidine 3o**

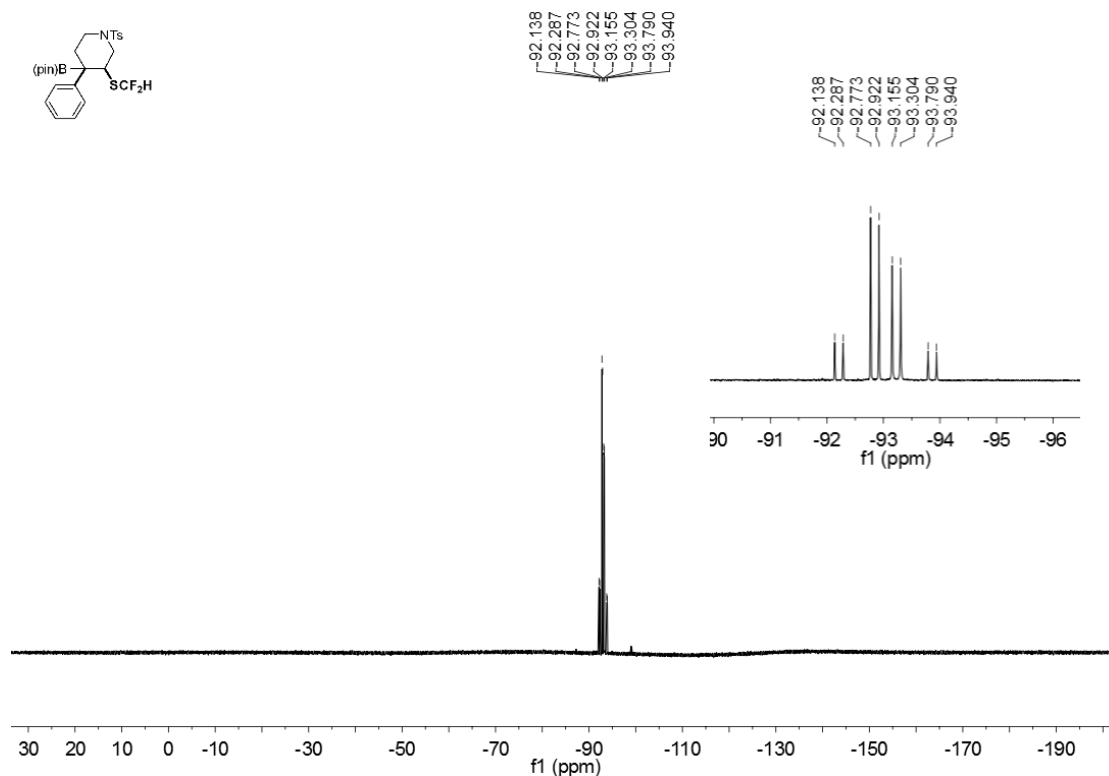

**<sup>11</sup>B NMR (128 MHz, CD<sub>3</sub>Cl<sub>3</sub>) spectrum of  
(±)-(3*R*,4*R*)-3-(difluoromethylthio)-4-phenyl-4-(4,4,5,5-tetramethyl-1,3,2-dioxaborolan-2-yl)-1-tosylpiperidine 3o**

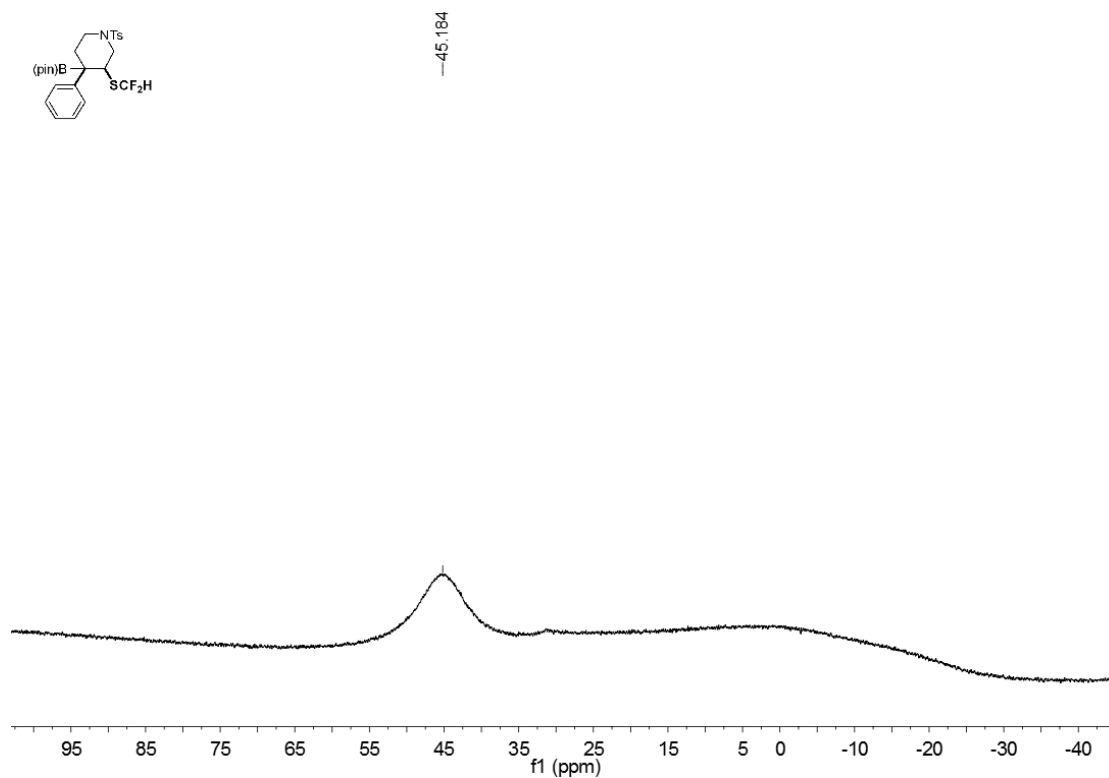

**<sup>1</sup>H NMR (400 MHz, CDCl<sub>3</sub>) spectrum of  
2-(1-(benzo[b]thiophen-5-yl)-2-(difluoromethylthio)ethyl)-4,4,5,5-tetramethyl-1,3,  
2-dioxaborolane 3p**

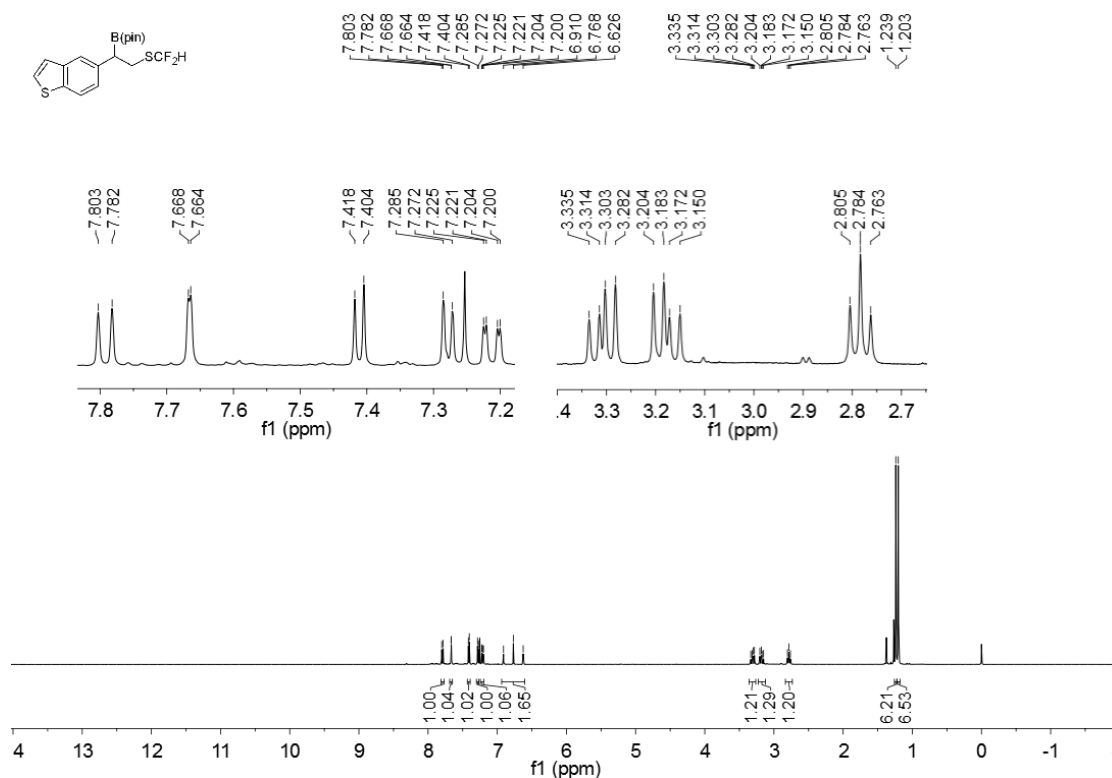

**<sup>13</sup>C NMR (101 MHz, CDCl<sub>3</sub>) spectrum of  
2-(1-(benzo[b]thiophen-5-yl)-2-(difluoromethylthio)ethyl)-4,4,5,5-tetramethyl-1,3,  
2-dioxaborolane 3p**

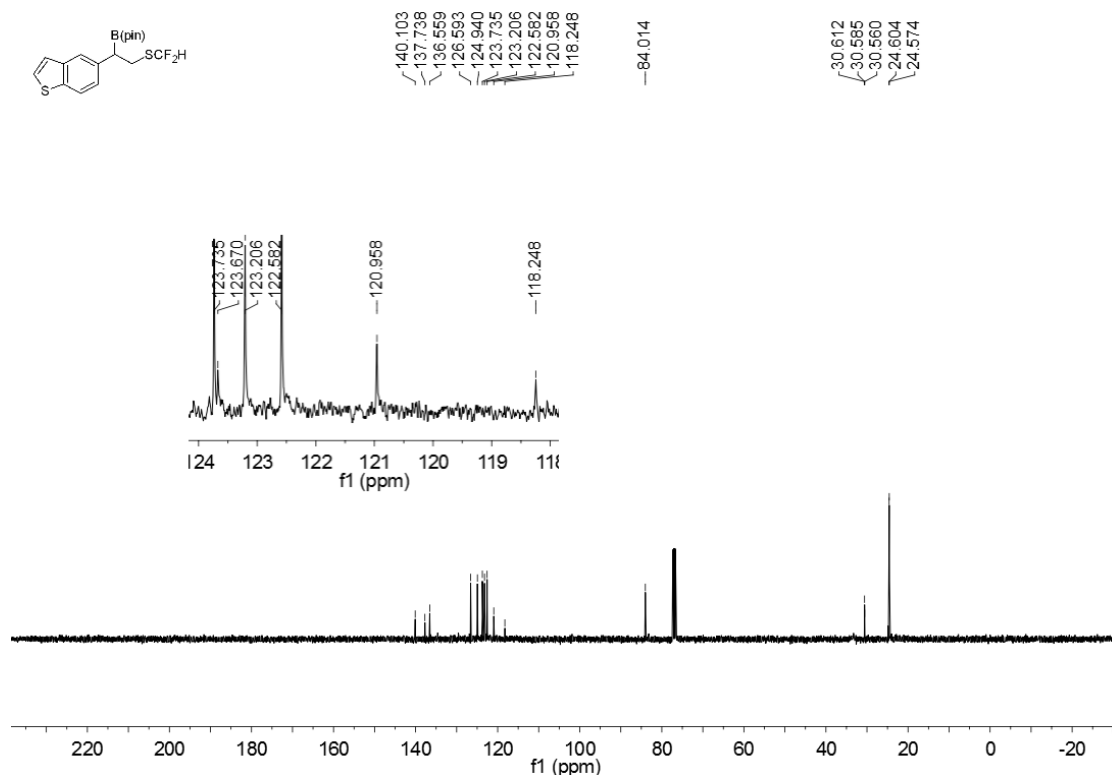

**$^{19}\text{F}$  NMR (376 MHz,  $\text{CDCl}_3$ ) spectrum of  
2-(1-(benzo[b]thiophen-5-yl)-2-(difluoromethylthio)ethyl)-4,4,5,5-tetramethyl-1,3,  
2-dioxaborolane 3p**

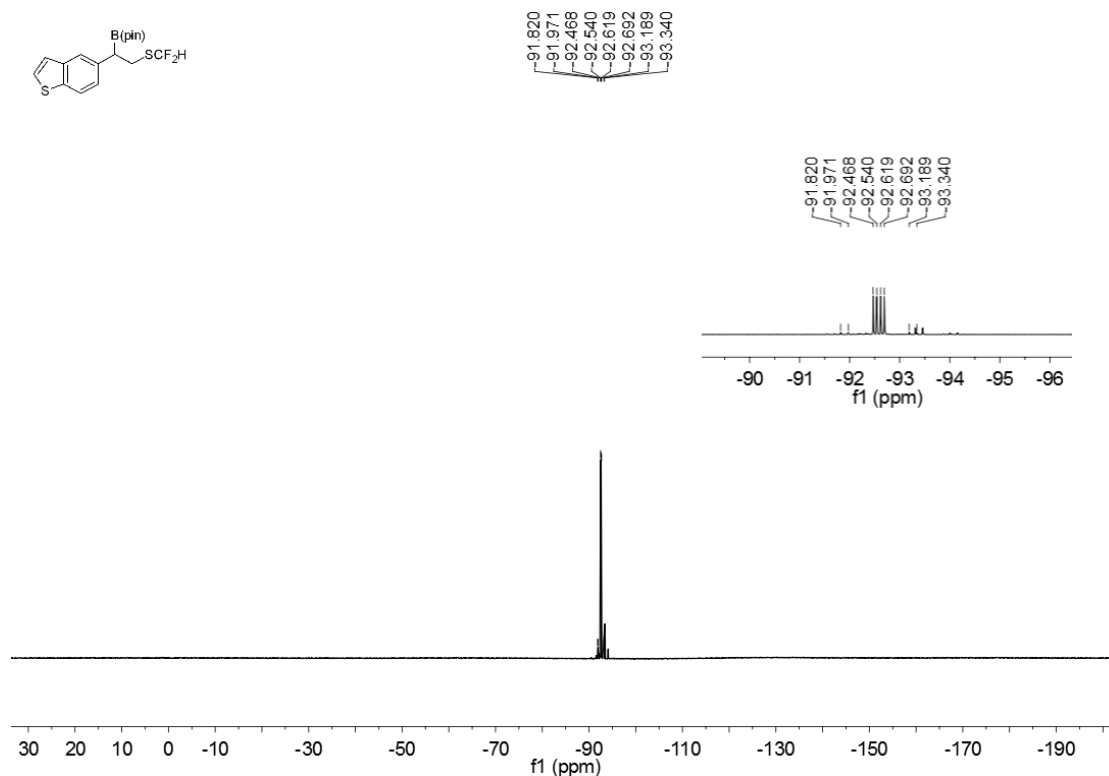

**$^{11}\text{B}$  NMR (128 MHz,  $\text{CD}_3\text{Cl}_3$ ) spectrum of  
2-(1-(benzo[b]thiophen-5-yl)-2-(difluoromethylthio)ethyl)-4,4,5,5-tetramethyl-1,3,  
2-dioxaborolane 3p**

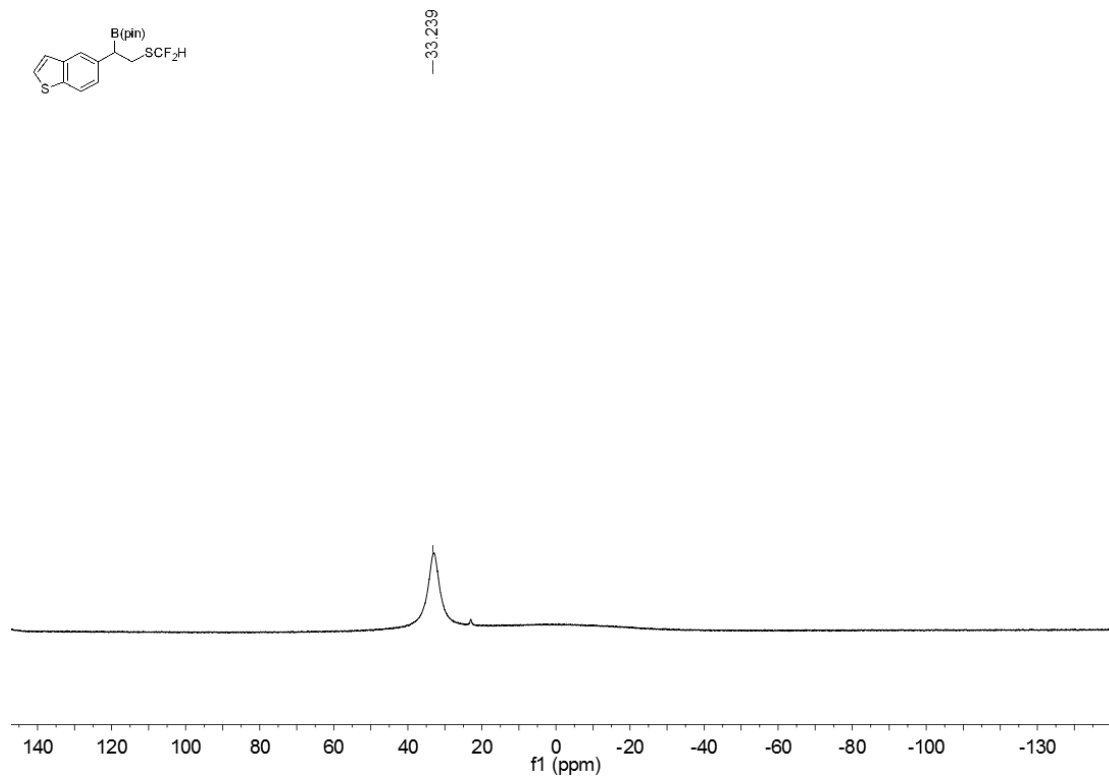



**<sup>1</sup>H NMR (400 MHz, CDCl<sub>3</sub>) spectrum of 2-(2-(difluoromethylthio)-1,1-diphenylethyl)-4,4,5,5-tetramethyl-1,3,2-dioxaborolane 3q**

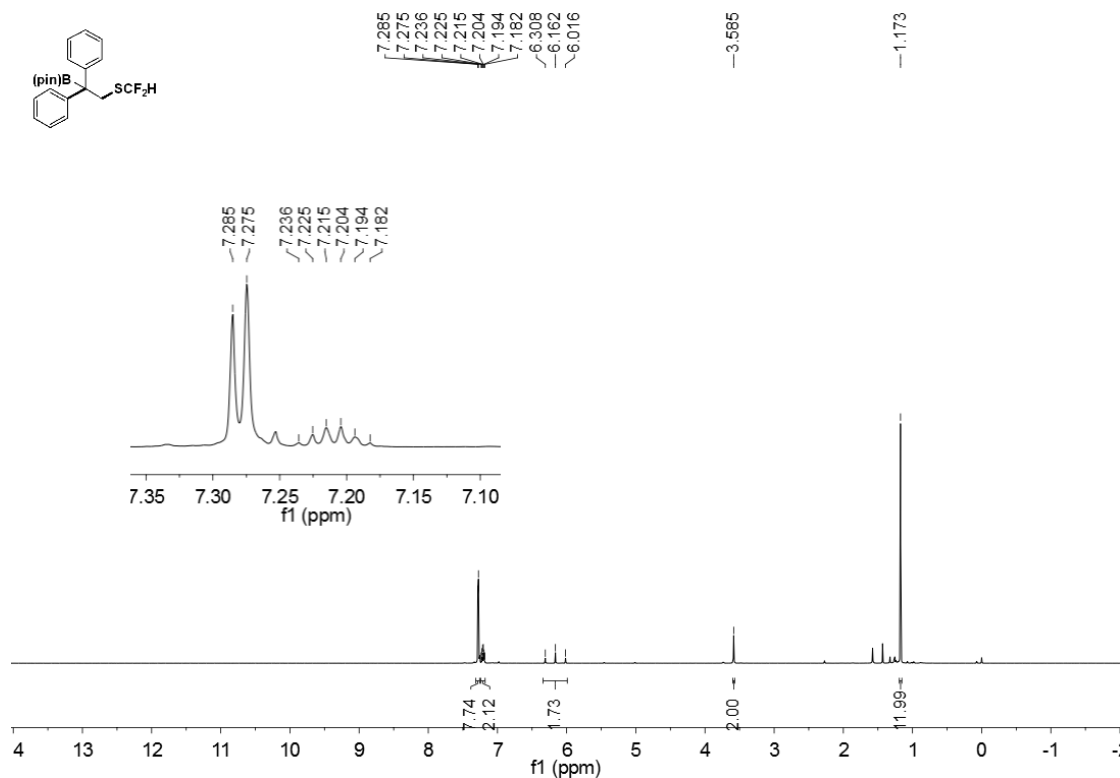

**<sup>13</sup>C NMR (101 MHz, CDCl<sub>3</sub>) spectrum of x2-(2-(difluoromethylthio)-1,1-diphenylethyl)-4,4,5,5-tetramethyl-1,3,2-dioxaborolane 3q**

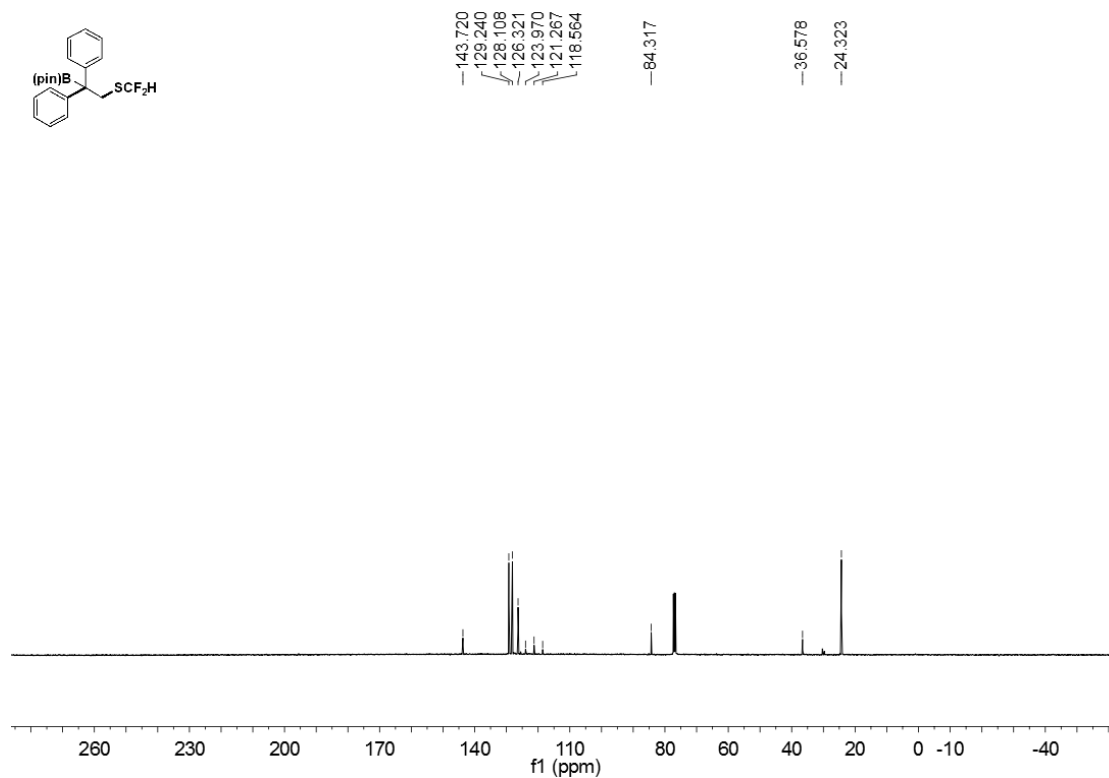

**<sup>19</sup>F NMR (376 MHz, CDCl<sub>3</sub>) spectrum of 2-(2-(difluoromethylthio)-1,1-diphenylethyl)-4,4,5,5-tetramethyl-1,3,2-dioxaborolane 3q**

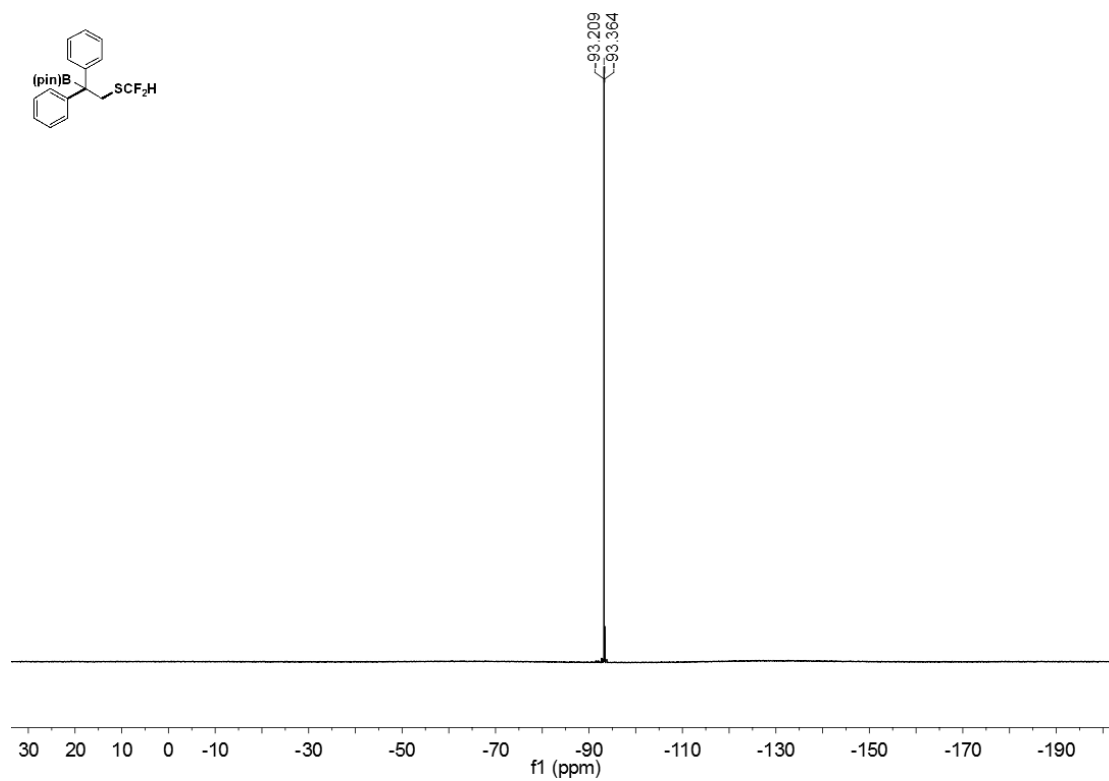

**<sup>11</sup>B NMR (128 MHz, CD<sub>3</sub>Cl<sub>3</sub>) spectrum of 2-(2-(difluoromethylthio)-1,1-diphenylethyl)-4,4,5,5-tetramethyl-1,3,2-dioxaborolane 3q**

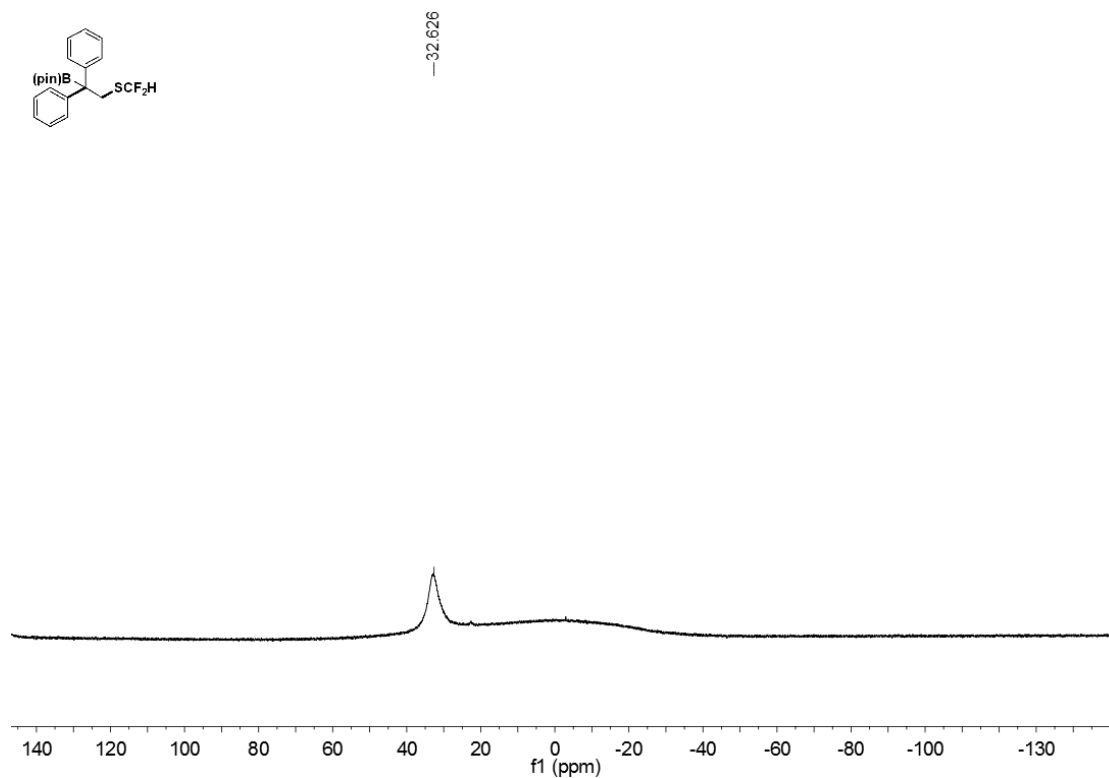

**<sup>1</sup>H NMR (400 MHz, CDCl<sub>3</sub>) spectrum of  
 (±)-(1*S*,2*R*,3*R*,5*R*)-8-benzyl-2-(difluoromethylthio)-3-phenyl-3-(4,4,5,5-tetramethyl-1,3,2-dioxaborolan-2-yl)-8-azabicyclo[3.2.1]octane 3s**

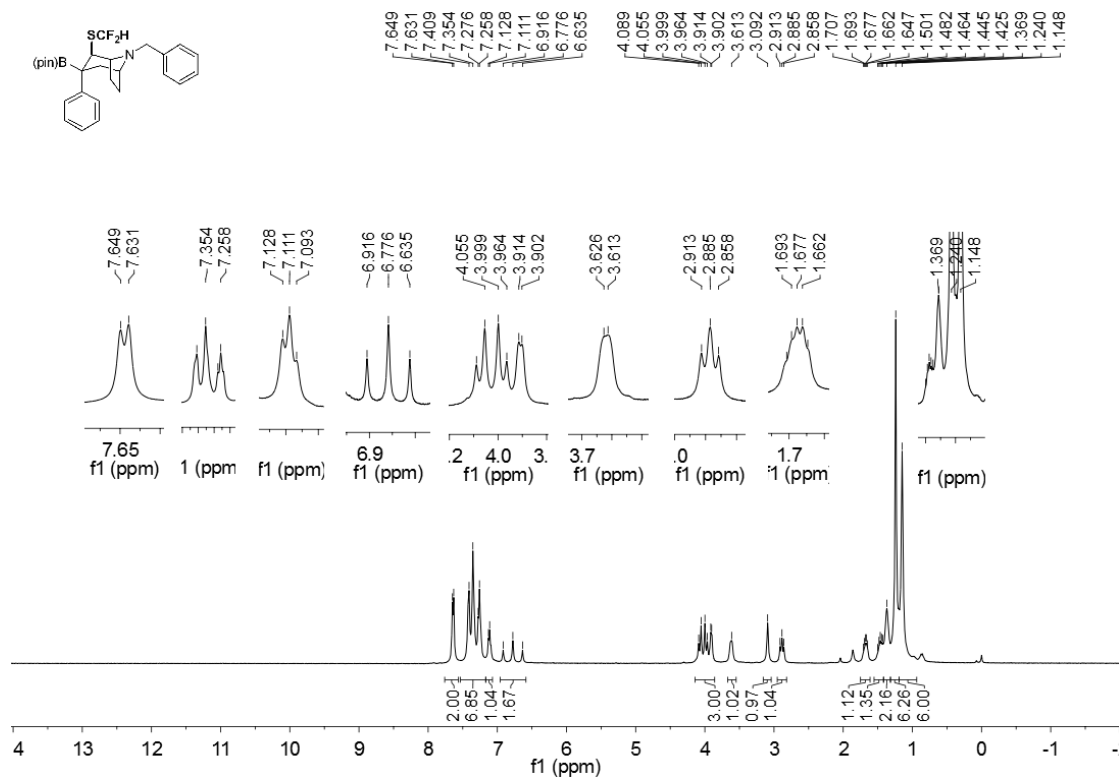

**<sup>13</sup>C NMR (101 MHz, CDCl<sub>3</sub>) spectrum of  
 (±)-(1*S*,2*R*,3*R*,5*R*)-8-benzyl-2-(difluoromethylthio)-3-phenyl-3-(4,4,5,5-tetramethyl-1,3,2-dioxaborolan-2-yl)-8-azabicyclo[3.2.1]octane 3s**

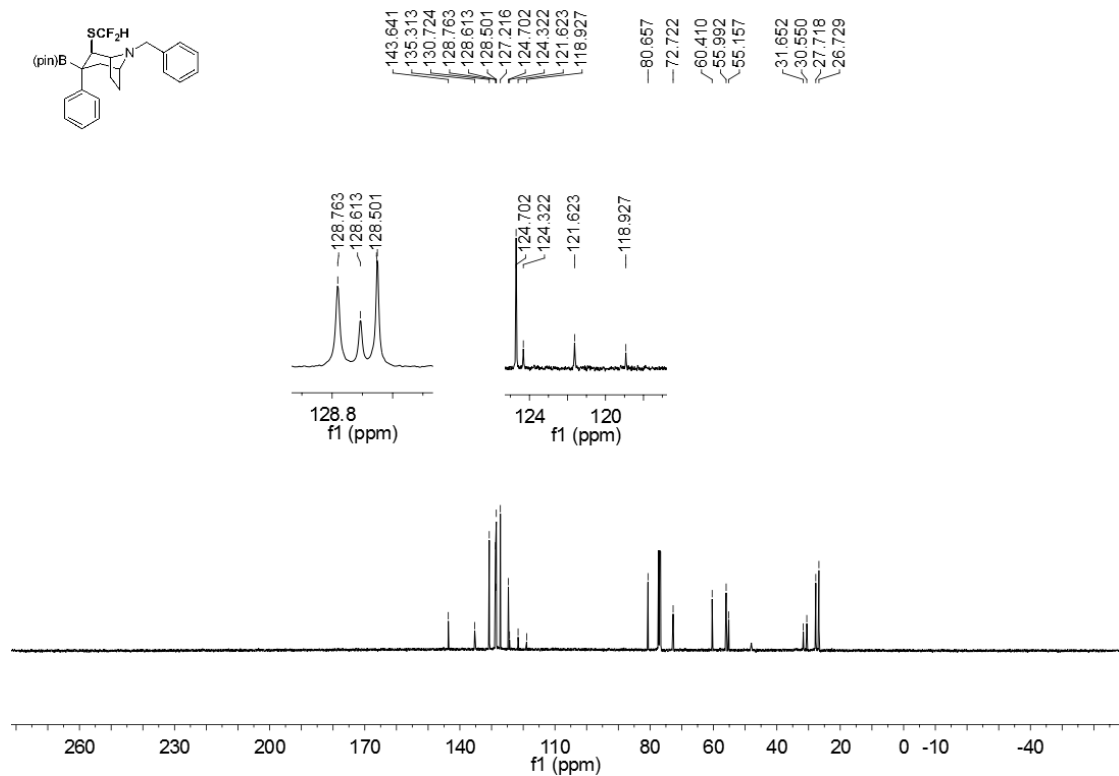

**$^{19}\text{F}$  NMR (376 MHz,  $\text{CDCl}_3$ ) spectrum of  
( $\pm$ )-(1*S*,2*R*,3*R*,5*R*)-8-benzyl-2-(difluoromethylthio)-3-phenyl-3-(4,4,5,5-tetramethyl-1,3,2-dioxaborolan-2-yl)-8-azabicyclo[3.2.1]octane 3s**

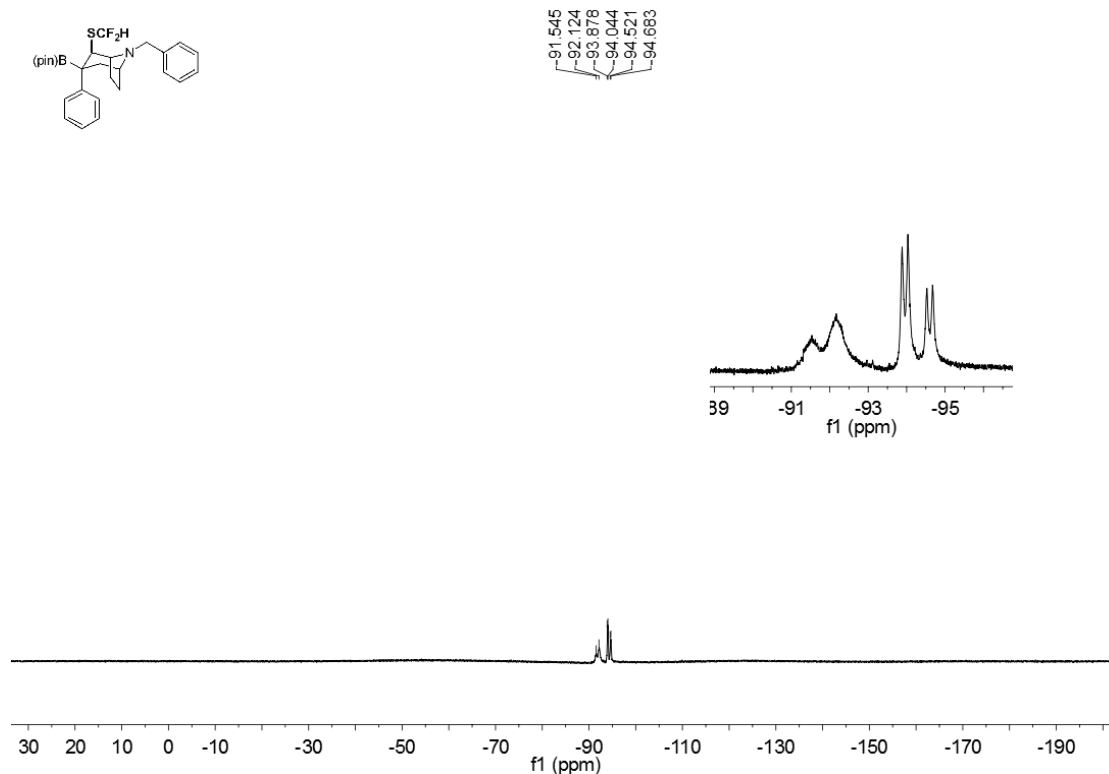

**$^{11}\text{B}$  NMR (128 MHz,  $\text{CD}_3\text{Cl}_3$ ) spectrum of  
( $\pm$ )-(1*S*,2*R*,3*R*,5*R*)-8-benzyl-2-(difluoromethylthio)-3-phenyl-3-(4,4,5,5-tetramethyl-1,3,2-dioxaborolan-2-yl)-8-azabicyclo[3.2.1]octane 3s**

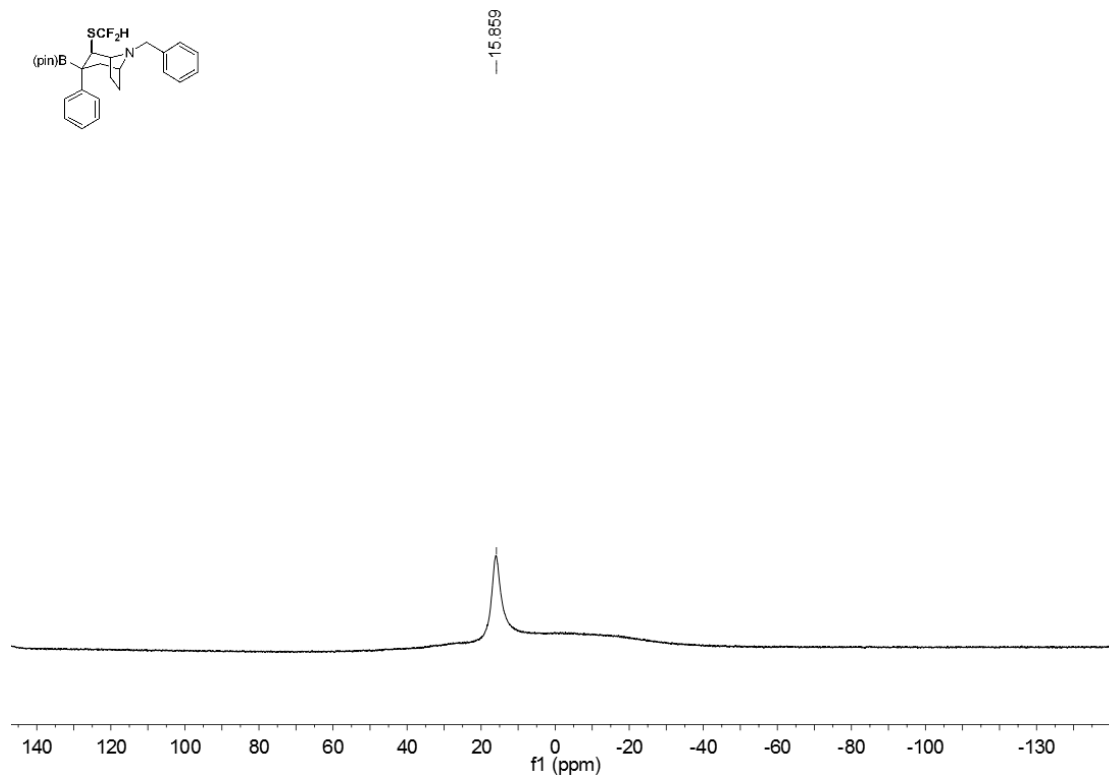

**<sup>1</sup>H NMR (400 MHz, CDCl<sub>3</sub>) spectrum of  
2-(difluoromethylthio)-1-phenylethanol 4a**

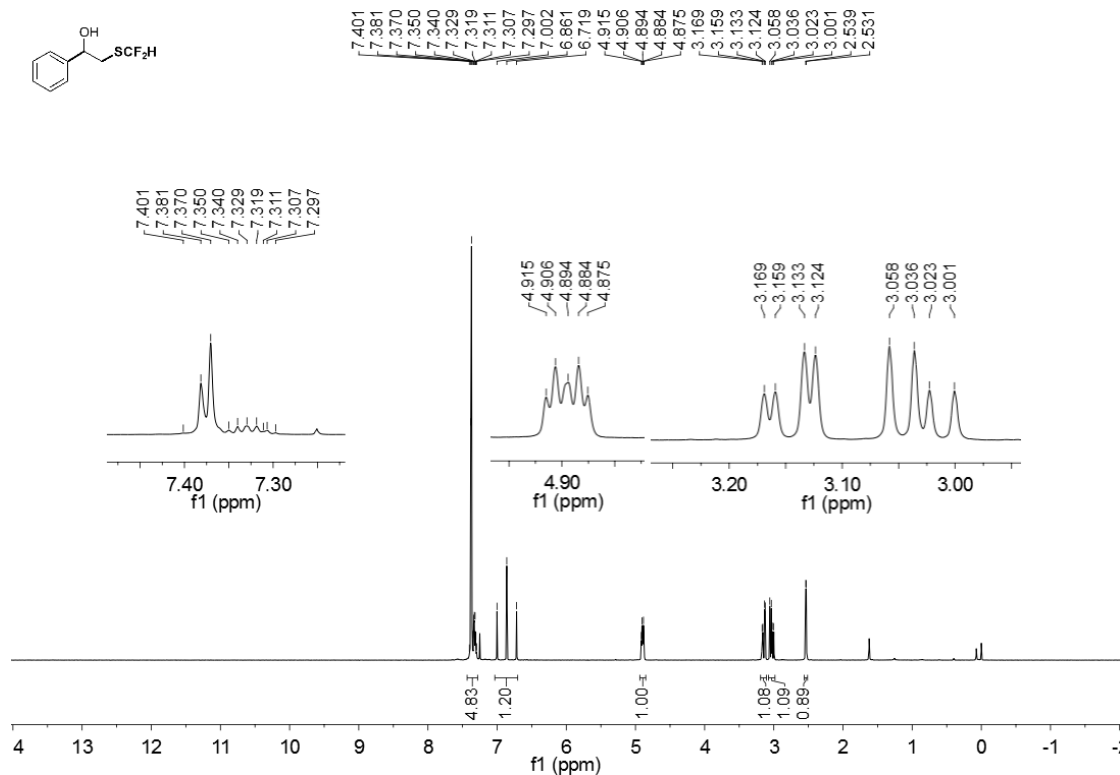

**<sup>13</sup>C NMR (101 MHz, CDCl<sub>3</sub>) spectrum of  
2-(difluoromethylthio)-1-phenylethanol 4a**

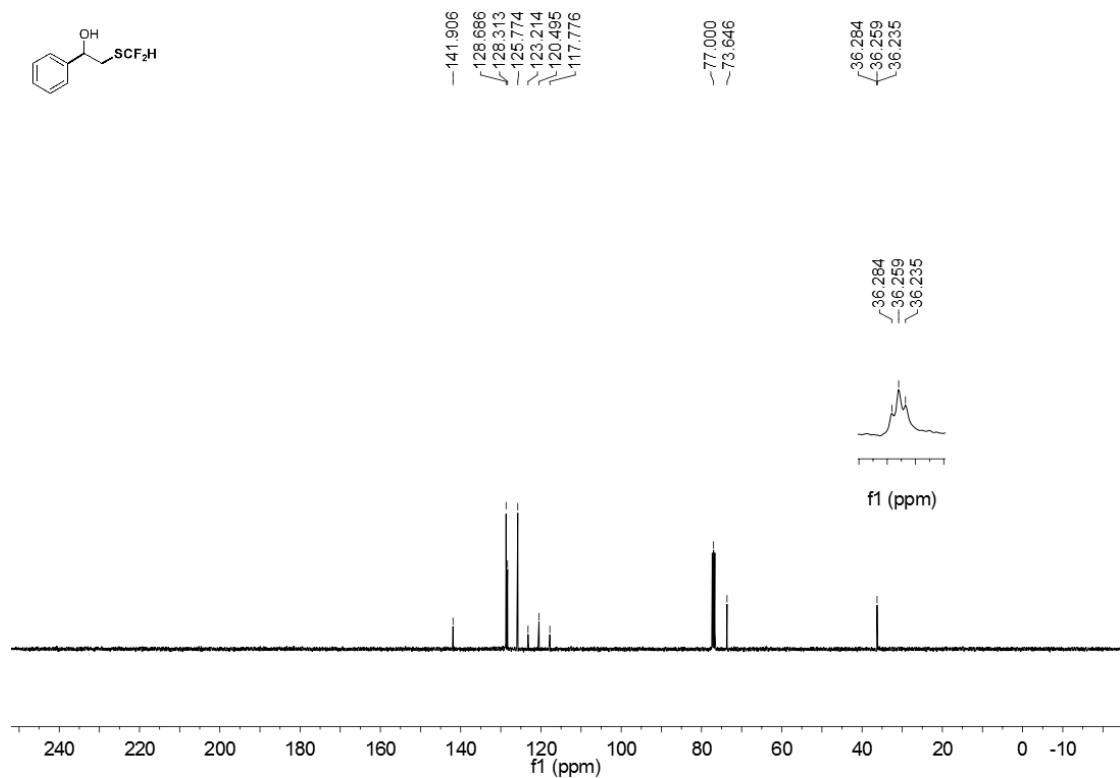

**$^{19}\text{F}$  NMR (376 MHz,  $\text{CDCl}_3$ ) spectrum of  
2-(difluoromethylthio)-1-phenylethanol 4a**

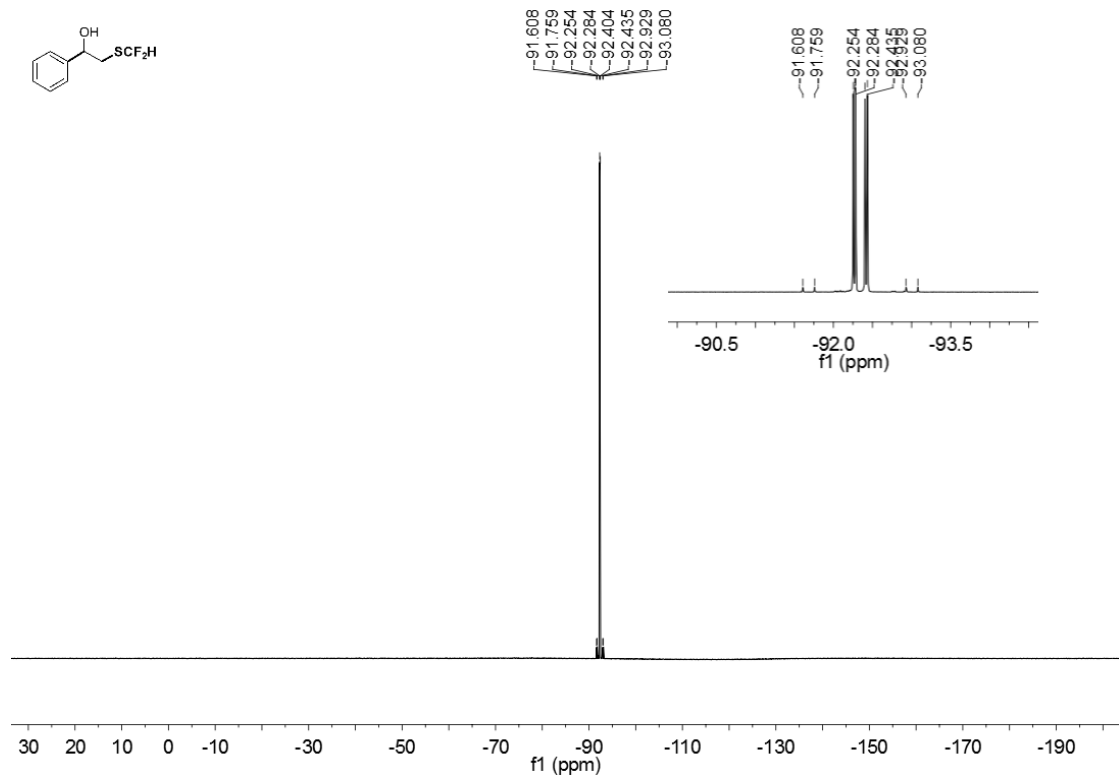

**$^1\text{H}$  NMR (400 MHz,  $\text{CDCl}_3$ ) spectrum of  
1-(difluoromethylthio)-2-phenylpropan-2-ol 4b**

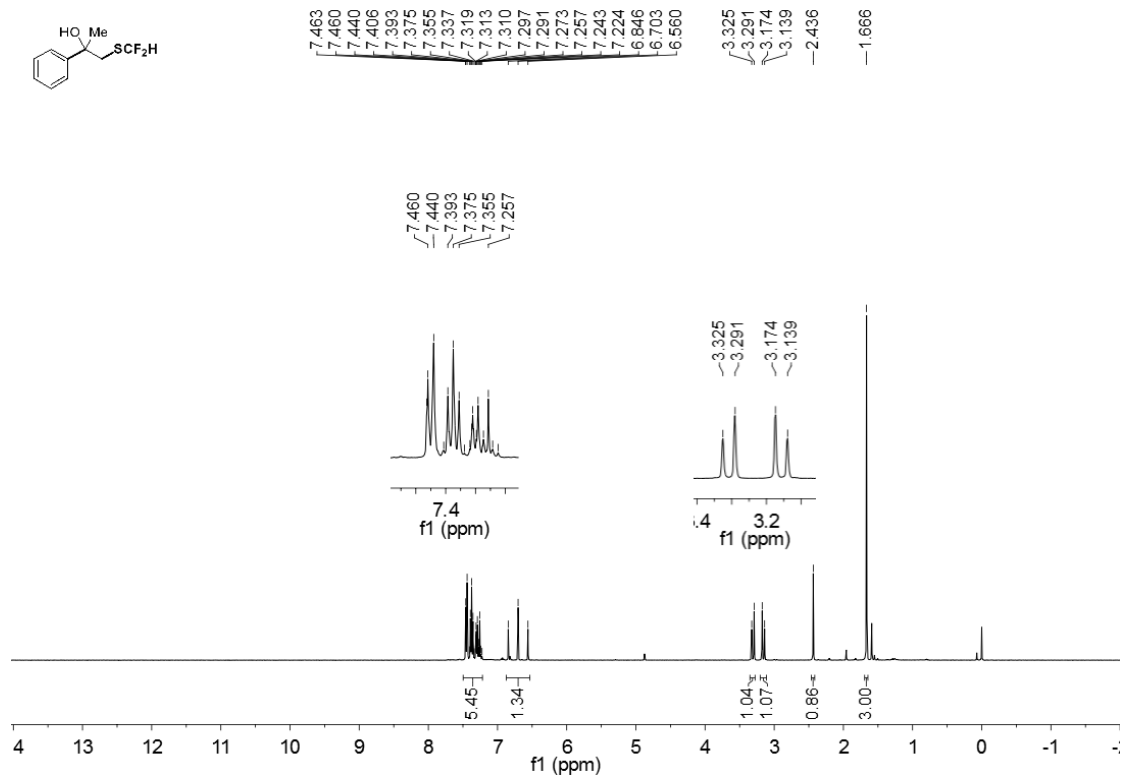

**<sup>13</sup>C NMR (101 MHz, CDCl<sub>3</sub>) spectrum of  
1-(difluoromethylthio)-2-phenylpropan-2-ol 4b**

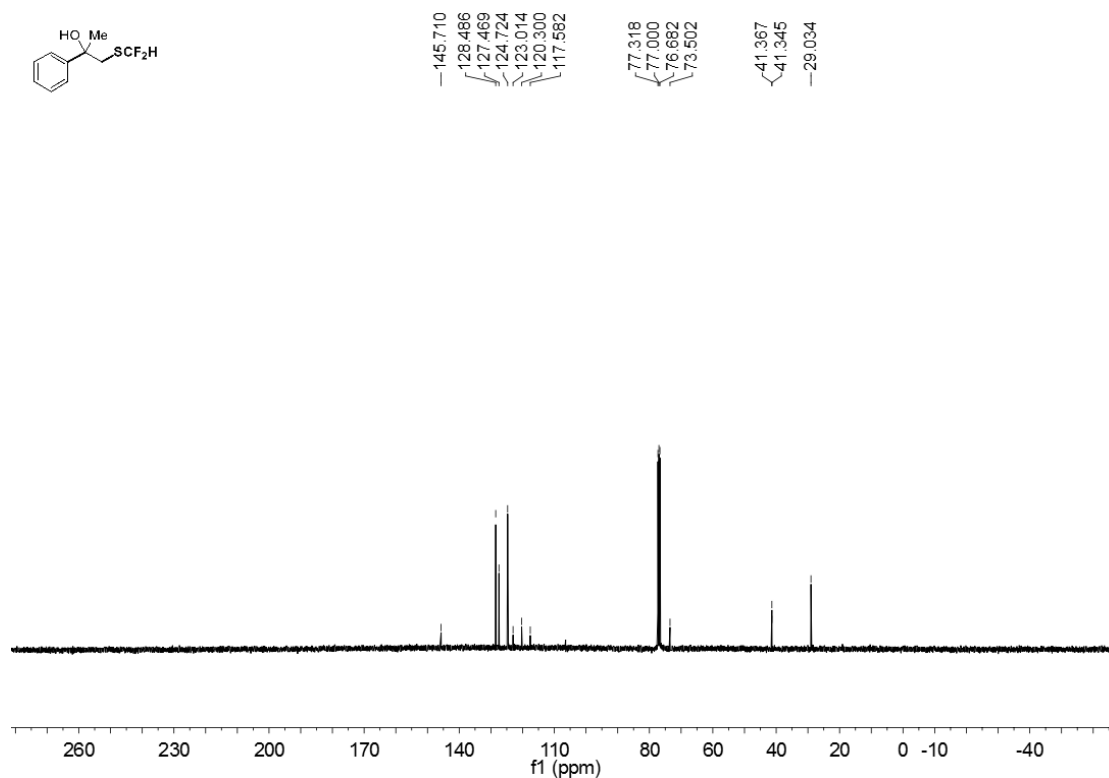

**<sup>19</sup>F NMR (376 MHz, CDCl<sub>3</sub>) spectrum of  
1-(difluoromethylthio)-2-phenylpropan-2-ol 4b**

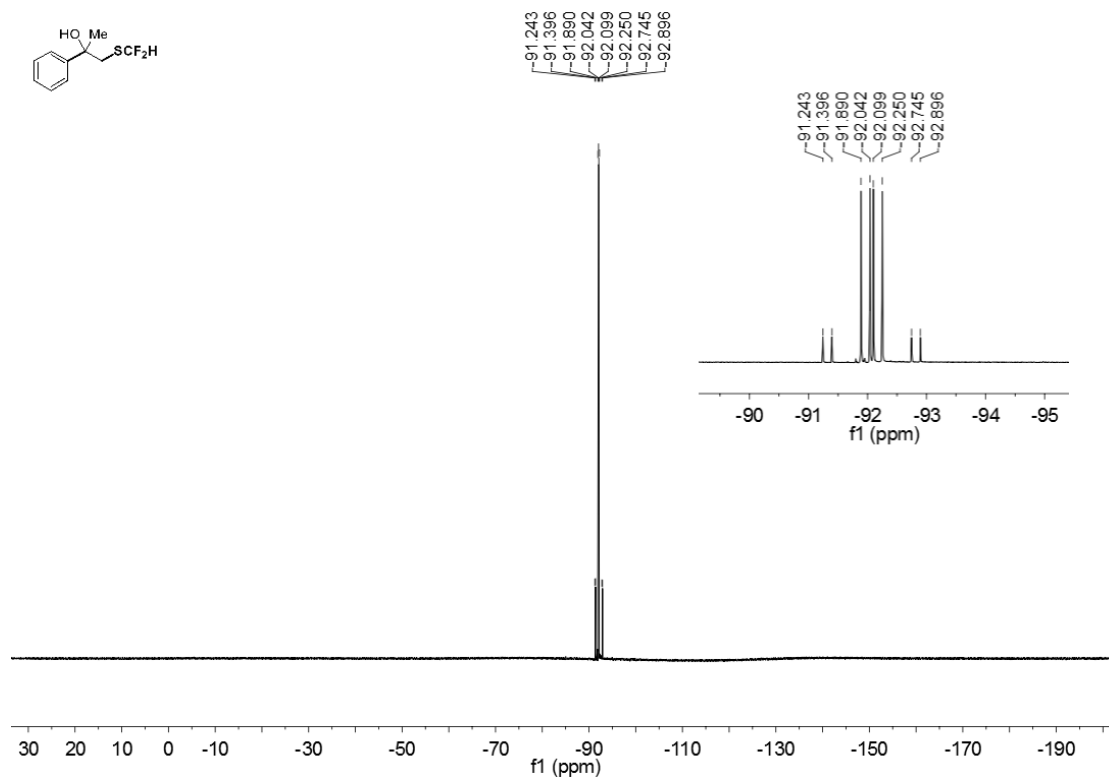

**<sup>1</sup>H NMR (400 MHz, CDCl<sub>3</sub>) spectrum of  
2-(difluoromethylthio)-2-methyl-1-phenylpropan-1-ol 4c**

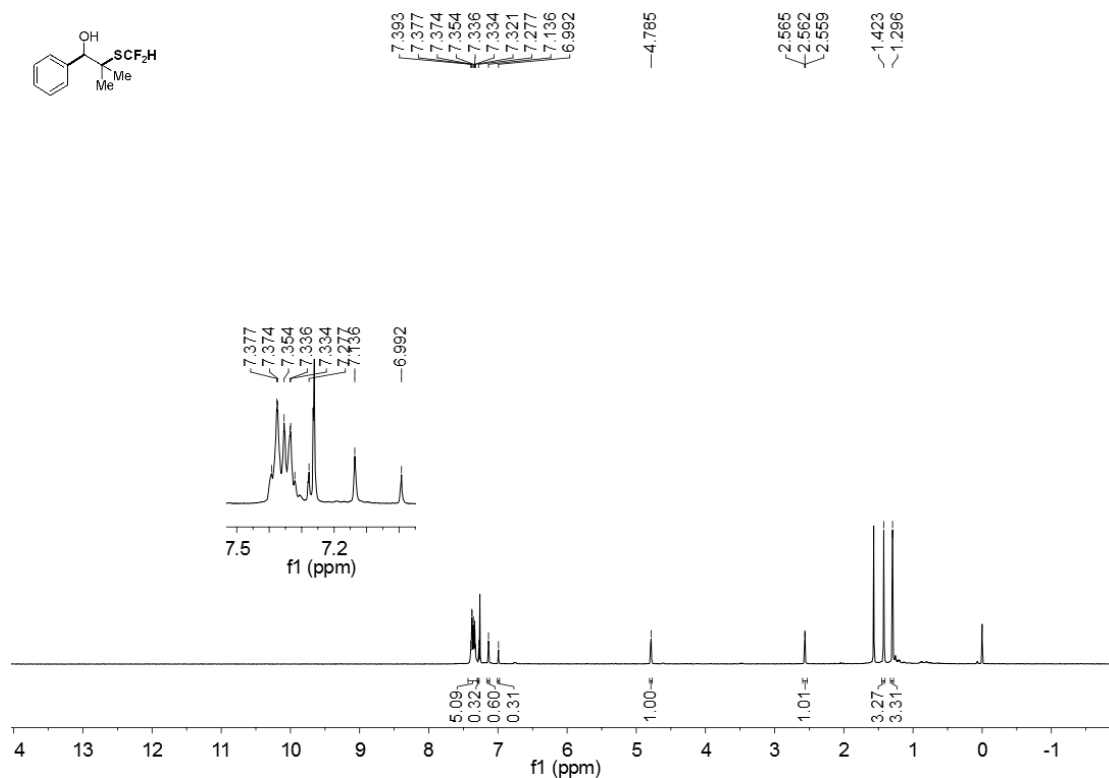

**<sup>13</sup>C NMR (101 MHz, CDCl<sub>3</sub>) spectrum of  
2-(difluoromethylthio)-2-methyl-1-phenylpropan-1-ol 4c**

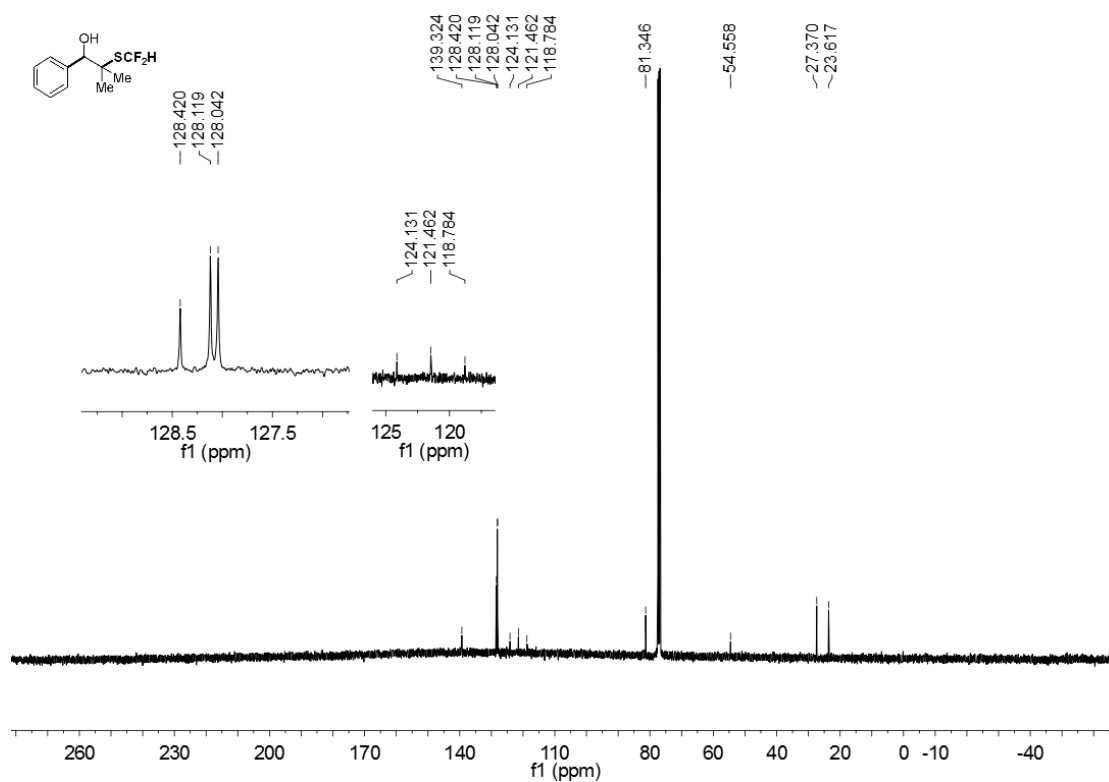



**$^{19}\text{F}$  NMR (376 MHz,  $\text{CDCl}_3$ ) spectrum of  
2-(difluoromethylthio)-2-methyl-1-phenylpropan-1-ol 4c**

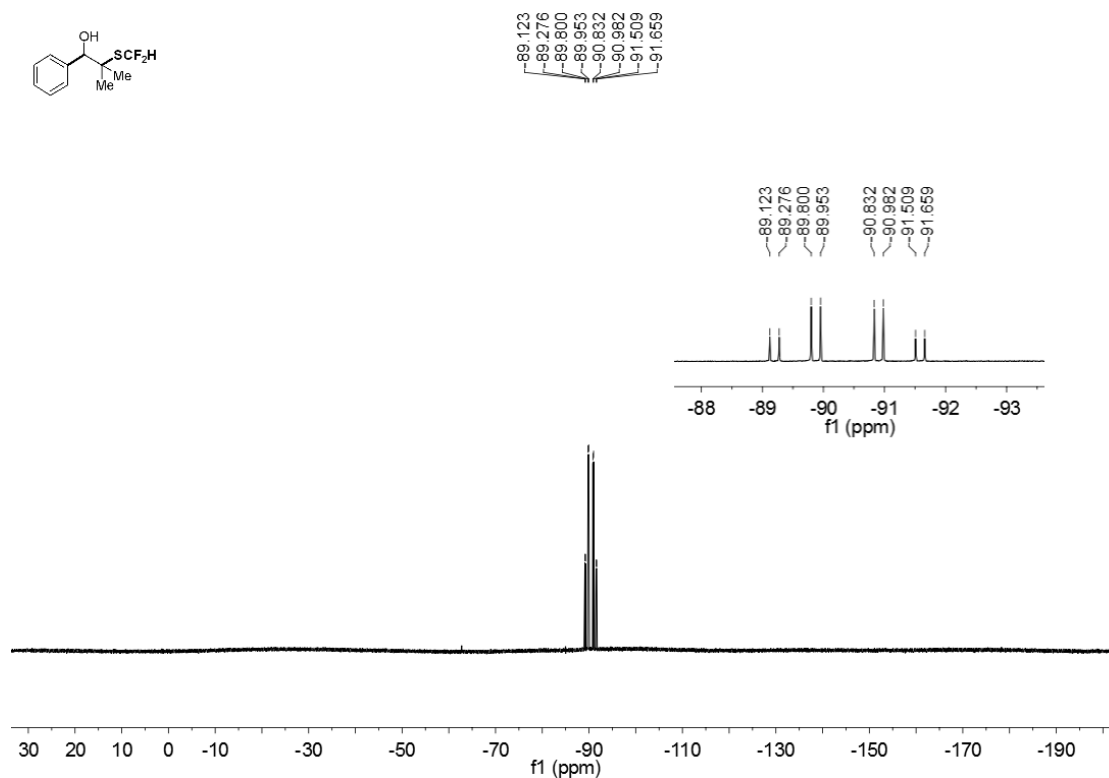

**$^1\text{H}$  NMR (400 MHz,  $\text{CDCl}_3$ ) spectrum of  
(±)-(1*R*,2*R*)-2-cyclopentyl-2-(difluoromethylthio)-1-phenylethanol 4d**

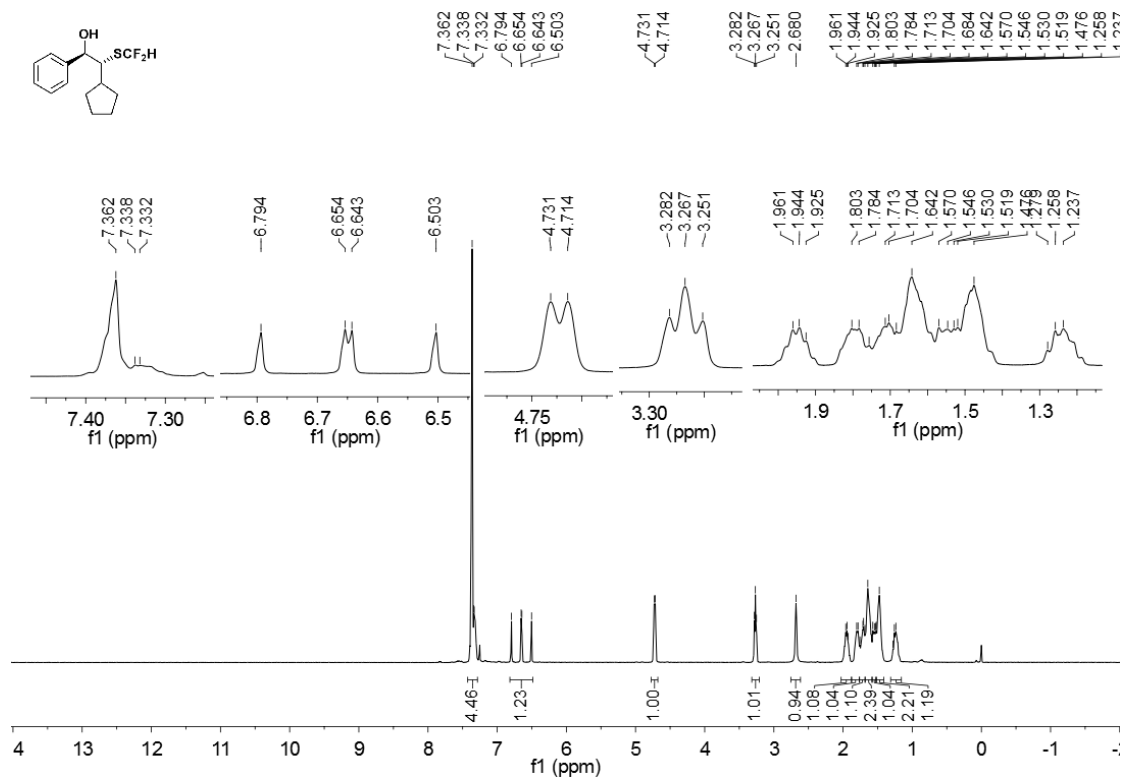

**$^{13}\text{C}$  NMR (101 MHz,  $\text{CDCl}_3$ ) spectrum of  
 $(\pm)$ -(1*R*,2*R*)-2-cyclopentyl-2-(difluoromethylthio)-1-phenylethanol 4d**

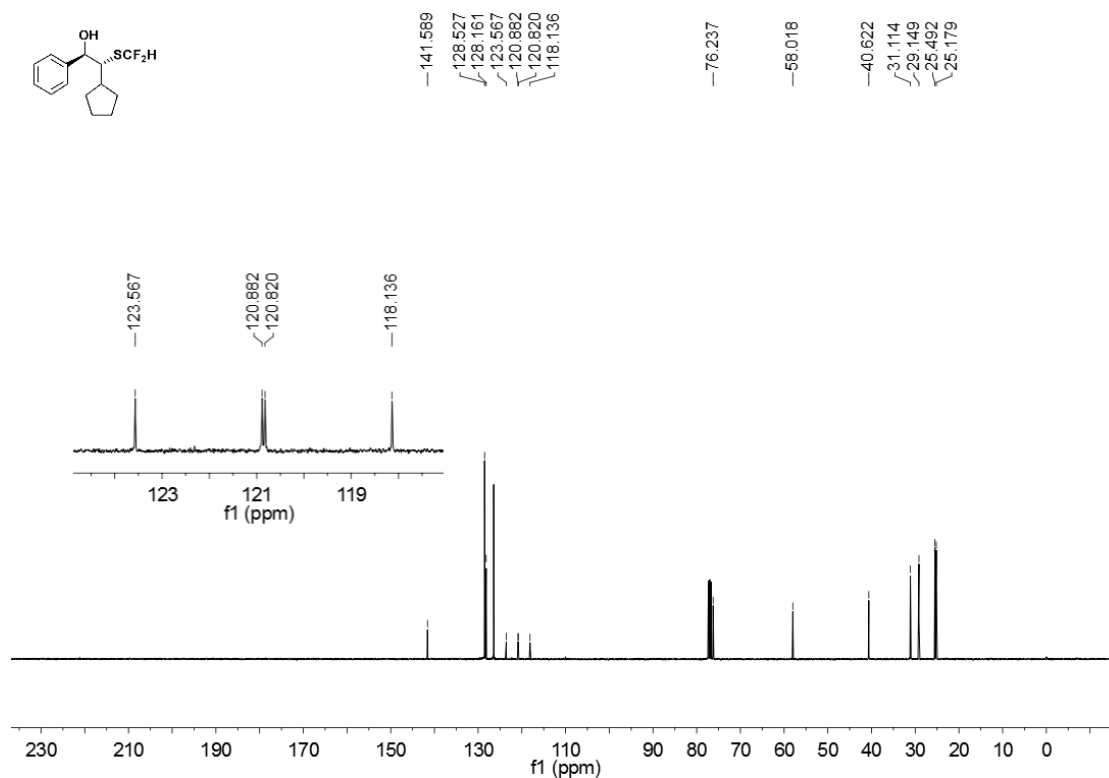

**$^{19}\text{F}$  NMR (376 MHz,  $\text{CDCl}_3$ ) spectrum of  
 $(\pm)$ -(1*R*,2*R*)-2-cyclopentyl-2-(difluoromethylthio)-1-phenylethanol 4d**

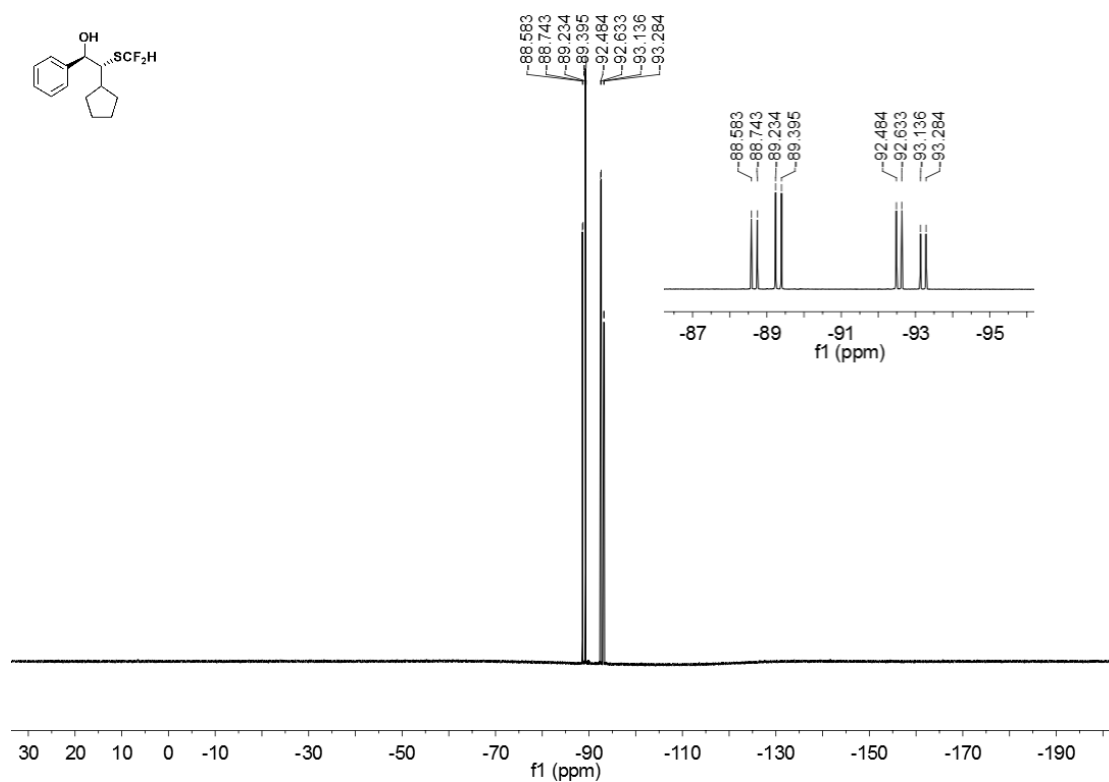

**<sup>1</sup>H NMR (400 MHz, CDCl<sub>3</sub>) spectrum of  
(±)-(1*S*,2*S*)-2-(difluoromethylthio)-1,5-diphenylpentan-1-ol 4e**

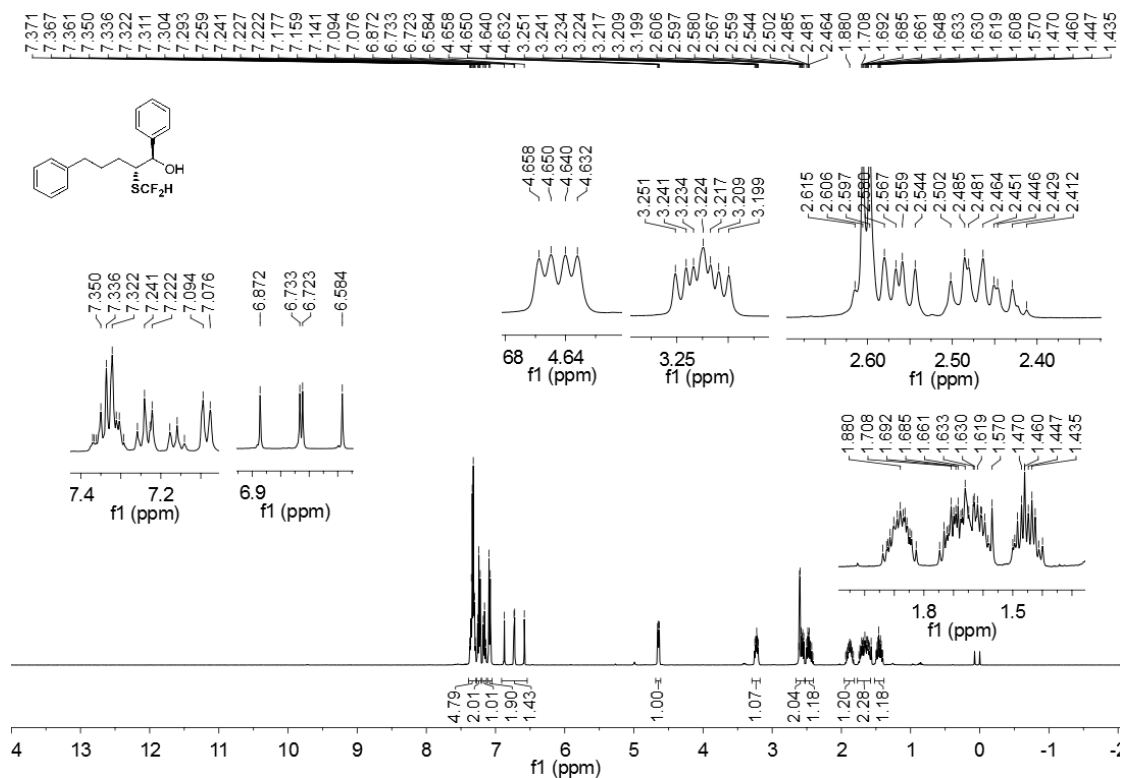

**<sup>13</sup>C NMR (101 MHz, CDCl<sub>3</sub>) spectrum of  
(±)-(1*S*,2*S*)-2-(difluoromethylthio)-1,5-diphenylpentan-1-ol 4e**

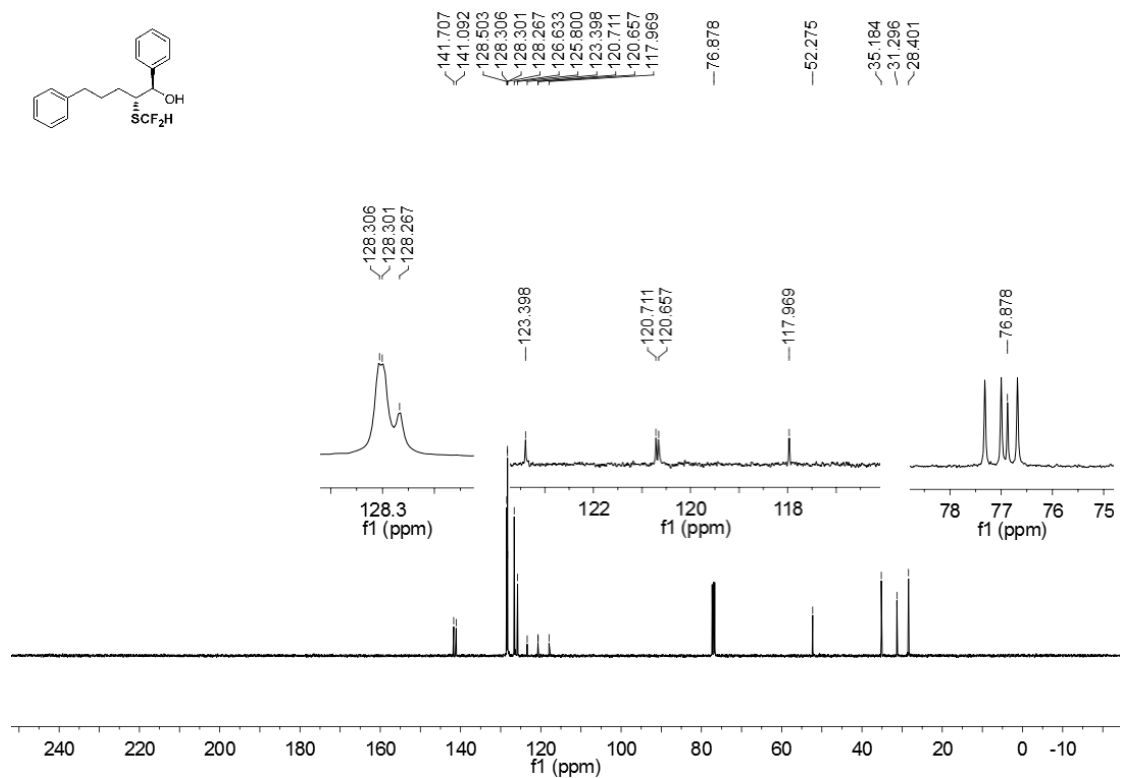

**$^{19}\text{F}$  NMR (376 MHz,  $\text{CDCl}_3$ ) spectrum of  
 $(\pm)$ -(1*S*,2*S*)-2-(difluoromethylthio)-1,5-diphenylpentan-1-ol 4e**

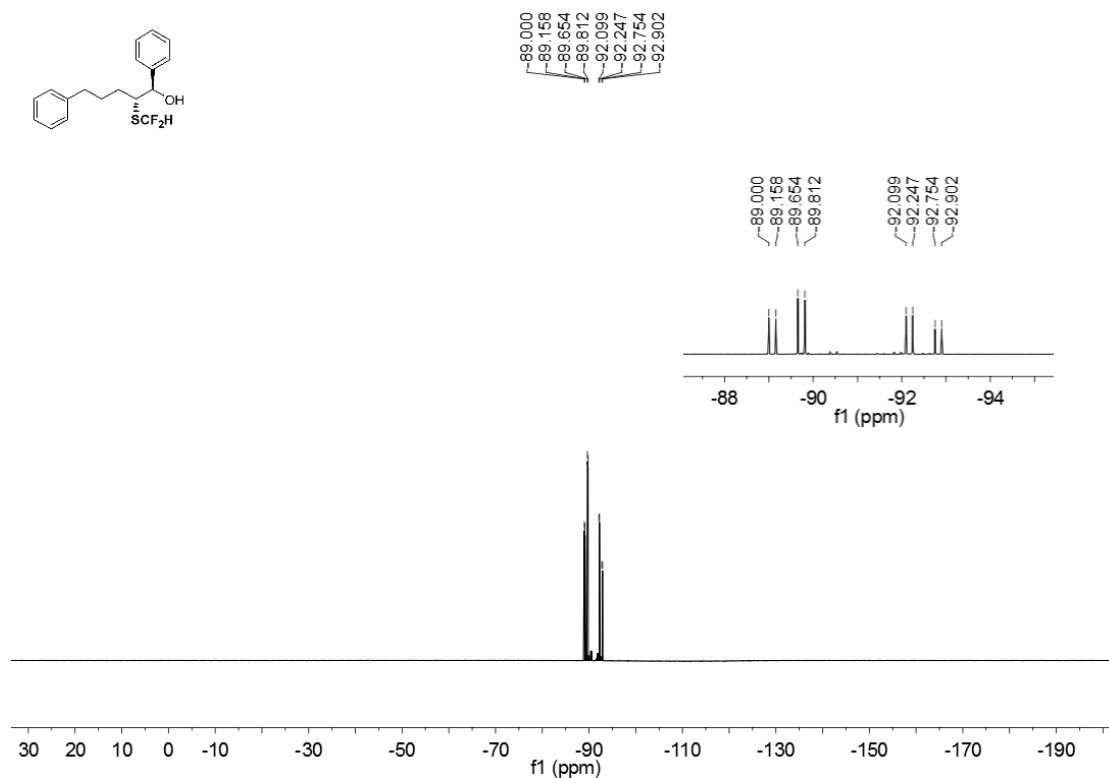

**$^1\text{H}$  NMR (400 MHz,  $\text{CDCl}_3$ ) spectrum of  
 $(\pm)$ -(1*R*,2*S*)-2-(difluoromethylthio)-1,5-diphenylpentan-1-ol 4f**

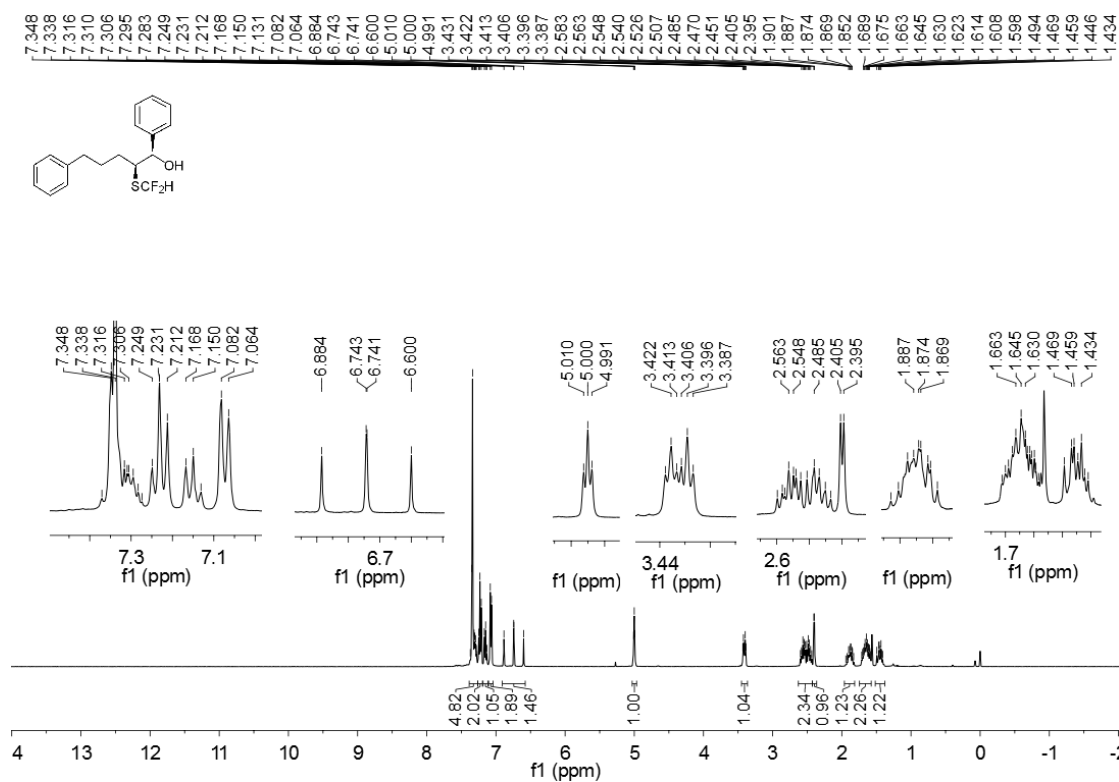

**$^{13}\text{C}$  NMR (101 MHz,  $\text{CDCl}_3$ ) spectrum of  
 $(\pm)$ -(1*R*,2*S*)-2-(difluoromethylthio)-1,5-diphenylpentan-1-ol 4f**

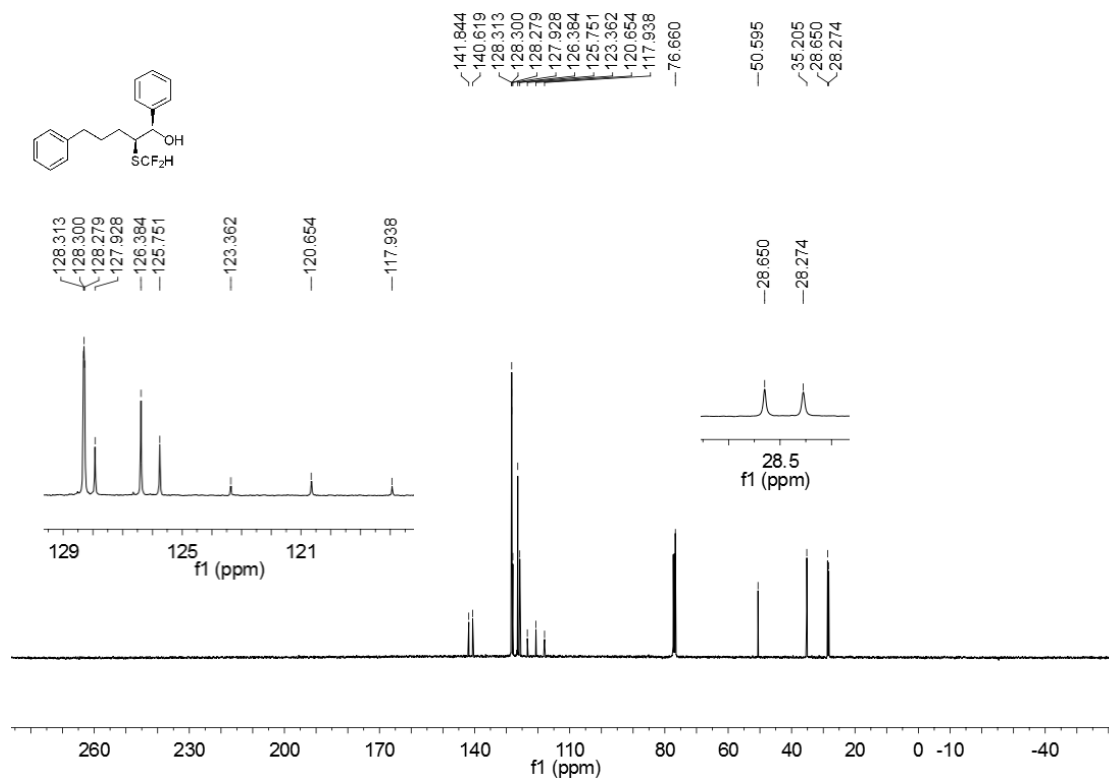

**$^{19}\text{F}$  NMR (376 MHz,  $\text{CDCl}_3$ ) spectrum of  
 $(\pm)$ -(1*R*,2*S*)-2-(difluoromethylthio)-1,5-diphenylpentan-1-ol 4f**

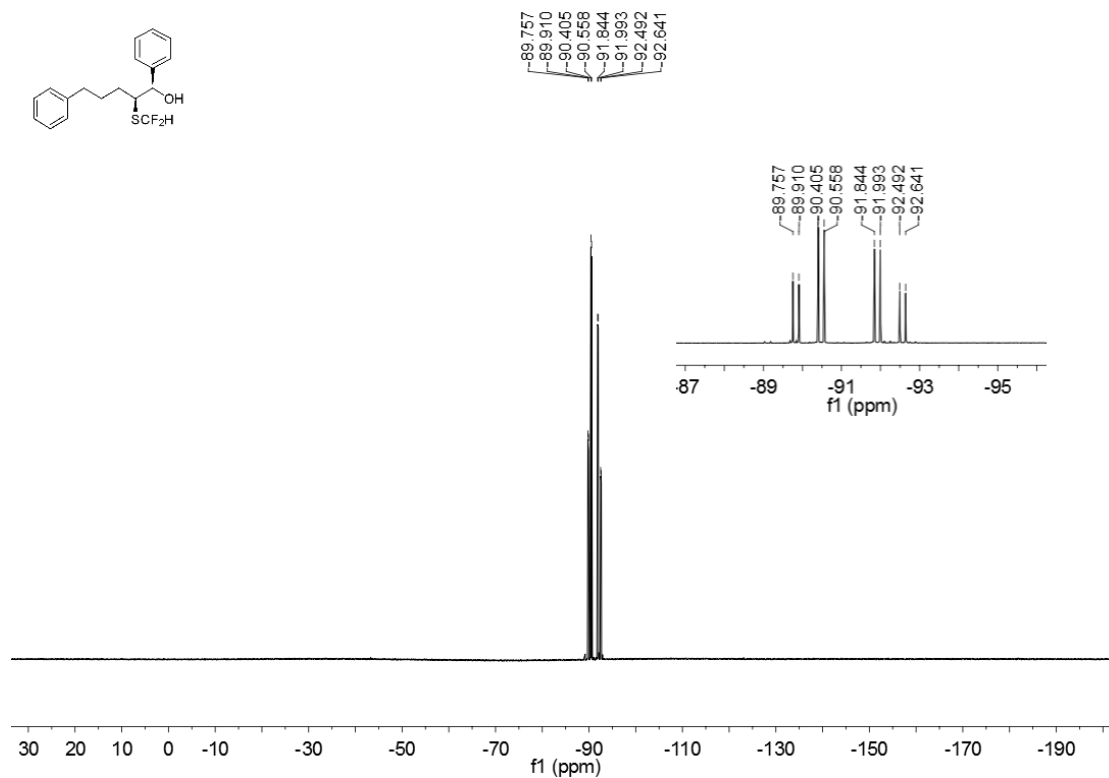

**<sup>1</sup>H NMR (400 MHz, CDCl<sub>3</sub>) spectrum of  
(S)-4,4,5,5-tetramethyl-2-(5-methyl-1-phenylhexan-3-yl)-1,3,2-dioxaborolane 5a**

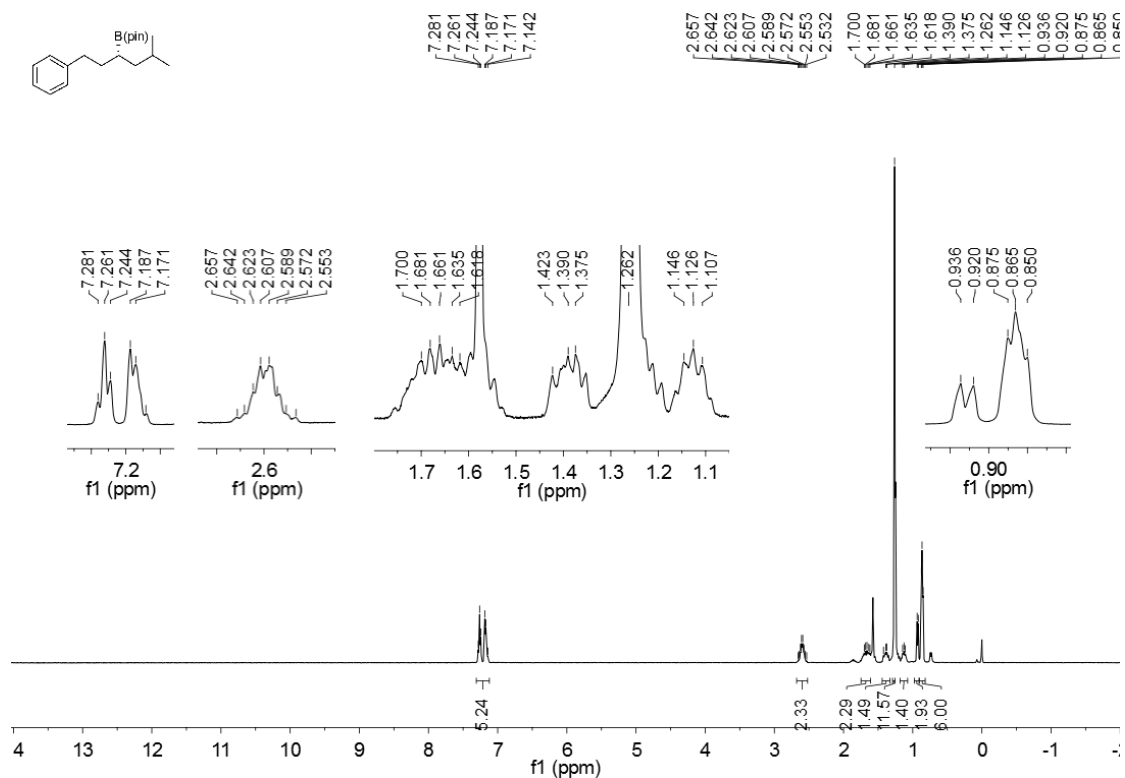

**<sup>13</sup>C NMR (151 MHz, CDCl<sub>3</sub>) spectrum of  
(S)-4,4,5,5-tetramethyl-2-(5-methyl-1-phenylhexan-3-yl)-1,3,2-dioxaborolane 5a**

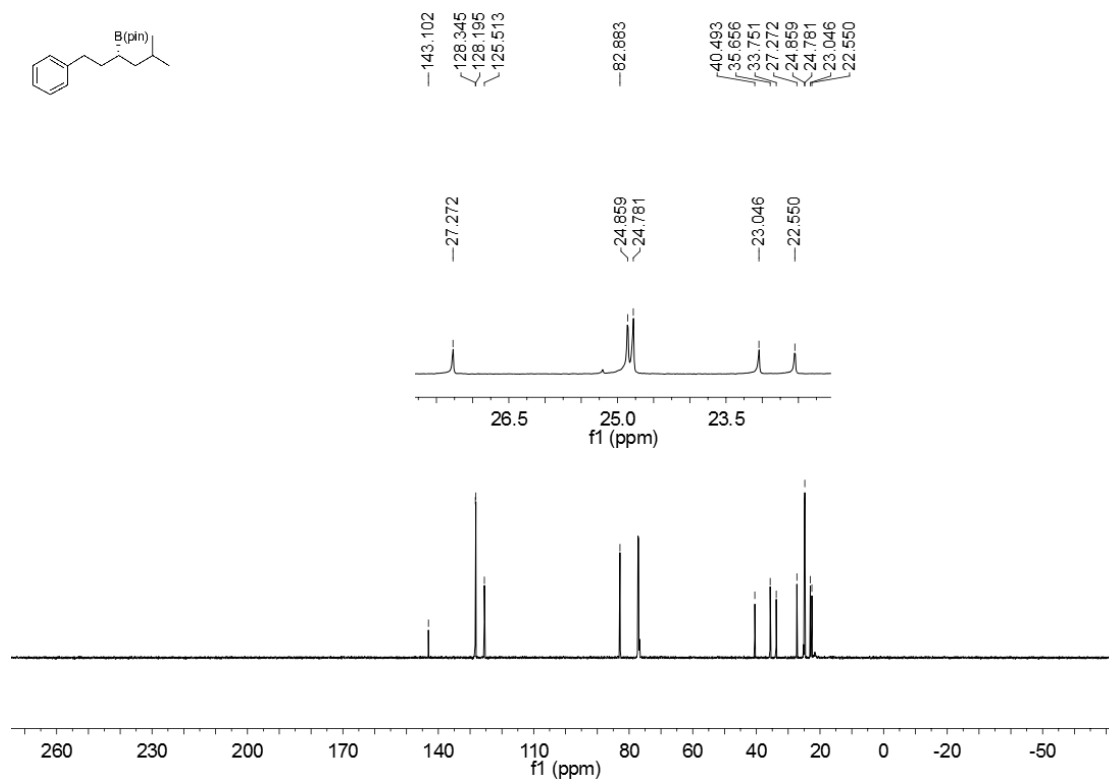

**$^{11}\text{B}$  NMR (193 MHz,  $\text{CD}_3\text{Cl}_3$ ) spectrum of  
(S)-4,4,5,5-tetramethyl-2-(5-methyl-1-phenylhexan-3-yl)-1,3,2-dioxaborolane 5a**

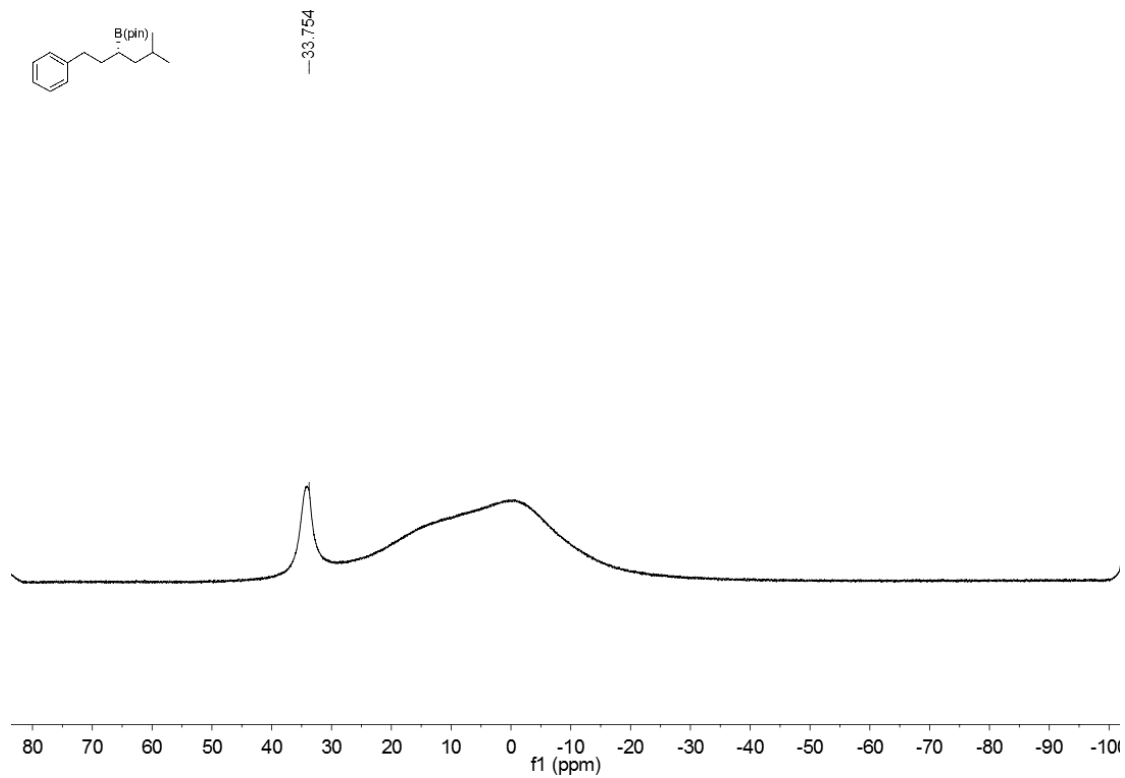

**HPLC spectrum of  
(S)-4,4,5,5-tetramethyl-2-(5-methyl-1-phenylhexan-3-yl)-1,3,2-dioxaborolane 5a**

HPLC (C1, 0.46 × 25 cm, 5 μm, carbon dioxide/isopropanol = 95/5 (v/v %), flow 2.0 mL/min, UV detection at 214 nm, 2000 psi, 40 °C)

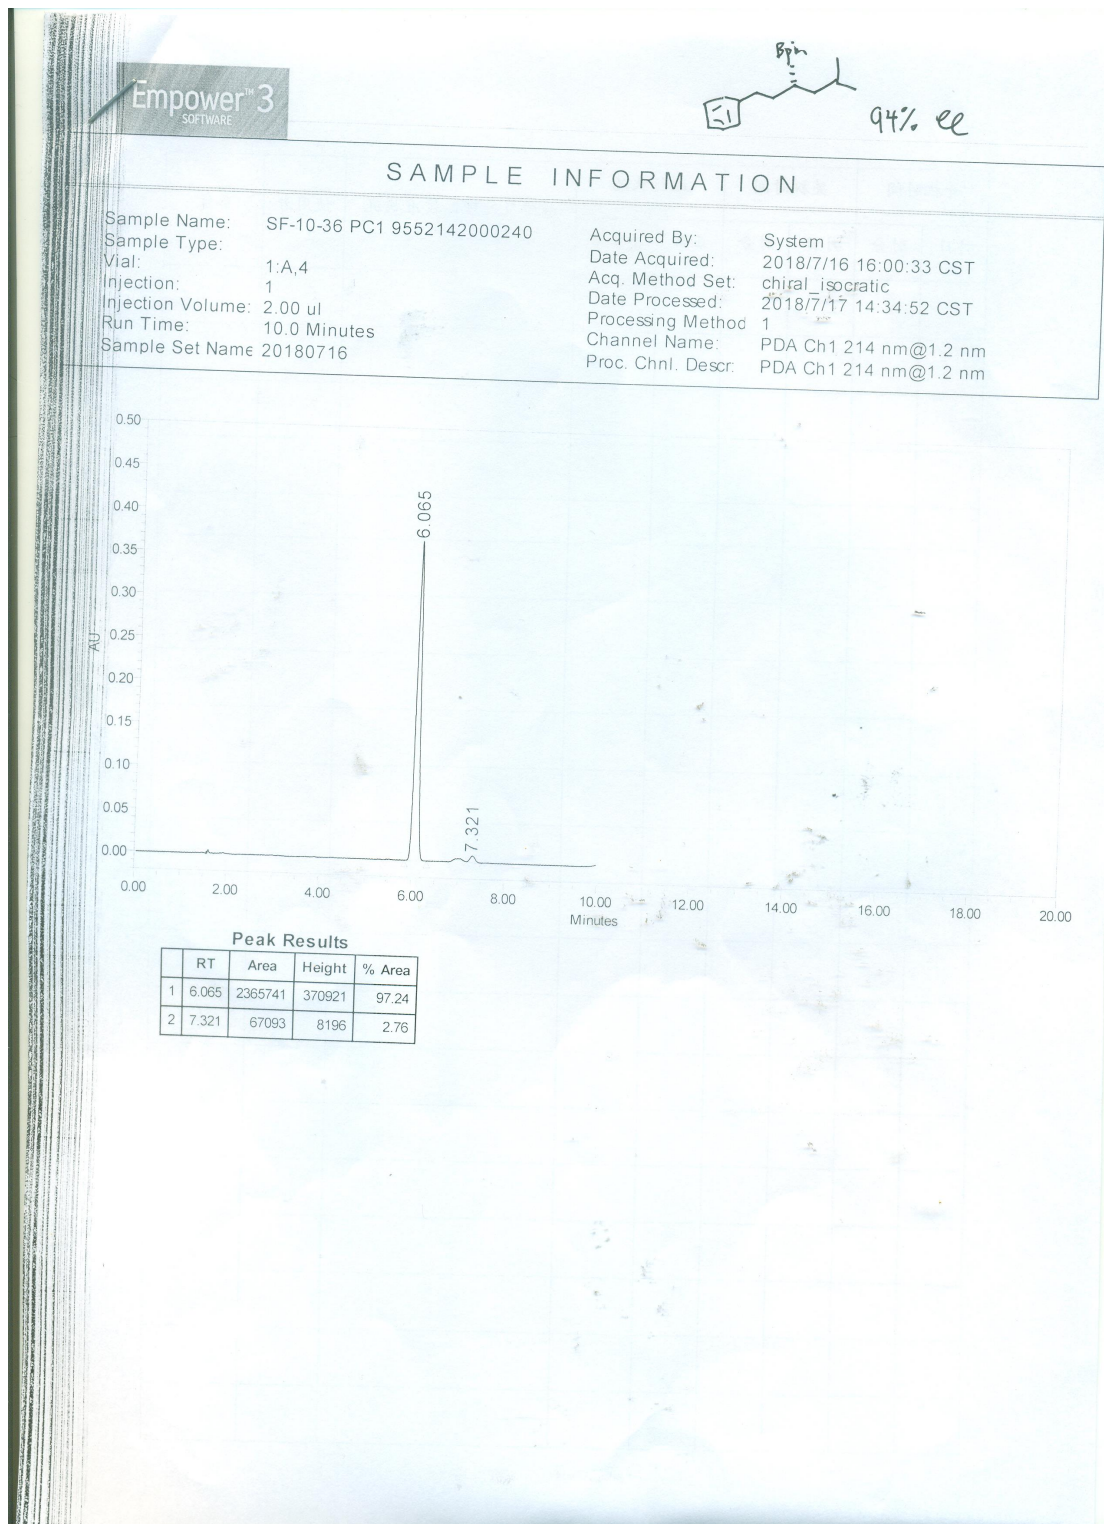



SAMPLE INFORMATION

|                   |                              |                    |                        |
|-------------------|------------------------------|--------------------|------------------------|
| Sample Name:      | SF-10-36-- PC1 9552142000240 | Acquired By:       | System                 |
| Sample Type:      |                              | Date Acquired:     | 2018/7/16 15:48:37 CST |
| Vial:             | 1:A,3                        | Acq. Method Set:   | chiral_isocratic       |
| Injection:        | 1                            | Date Processed:    | 2018/7/17 14:34:01 CST |
| Injection Volume: | 2.00 ul                      | Processing Method: | 1                      |
| Run Time:         | 30.0 Minutes                 | Channel Name:      | PDA Ch1 214 nm@1.2 nm  |
| Sample Set Name:  | 20180716                     | Proc. Chnl. Descr: | PDA Ch1 214 nm@1.2 nm  |

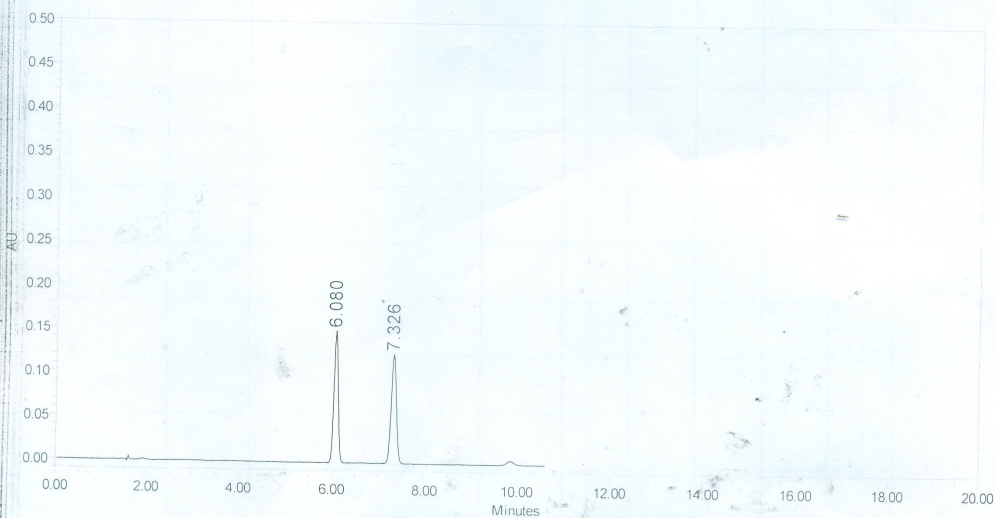

Peak Results

|   | RT    | Area   | Height | % Area |
|---|-------|--------|--------|--------|
| 1 | 6.080 | 961772 | 150838 | 49.80  |
| 2 | 7.326 | 969632 | 124815 | 50.20  |

**<sup>1</sup>H NMR (600 MHz, CDCl<sub>3</sub>) spectrum of  
(*R*)-4,4,5,5-tetramethyl-2-(1-phenylhept-6-en-3-yl)-1,3,2-dioxaborolane 5b**

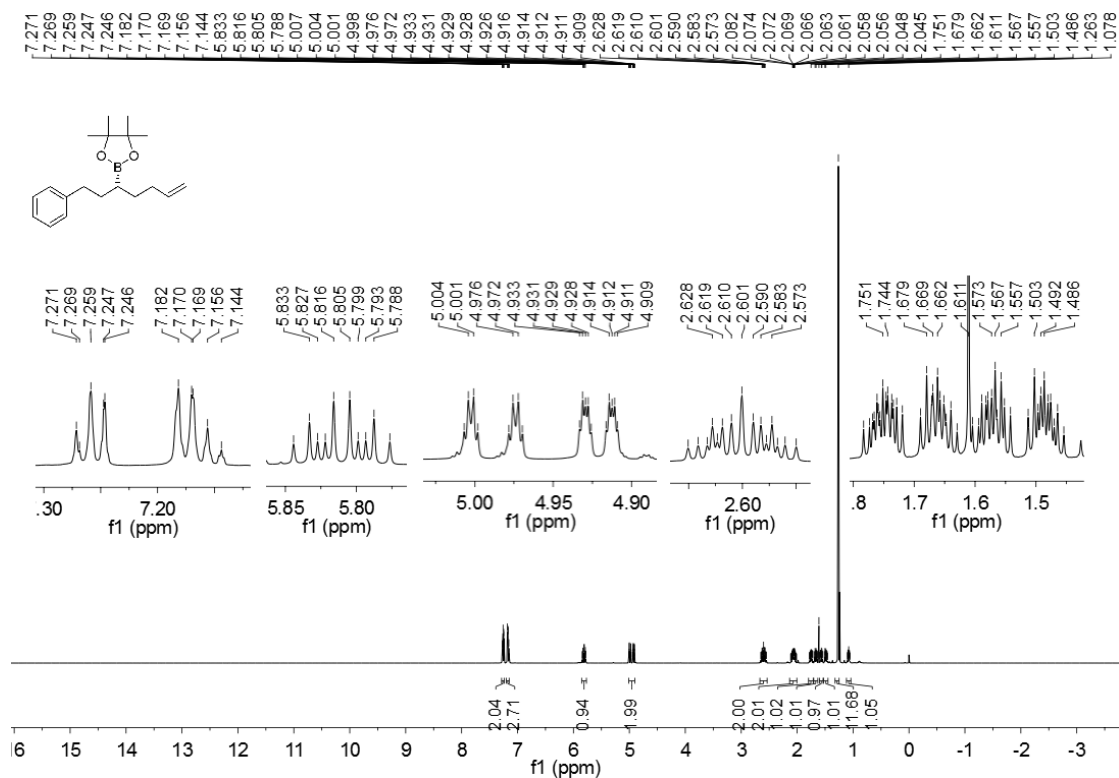

**<sup>13</sup>C NMR (151 MHz, CDCl<sub>3</sub>) spectrum of  
(*R*)-4,4,5,5-tetramethyl-2-(1-phenylhept-6-en-3-yl)-1,3,2-dioxaborolane 5b**

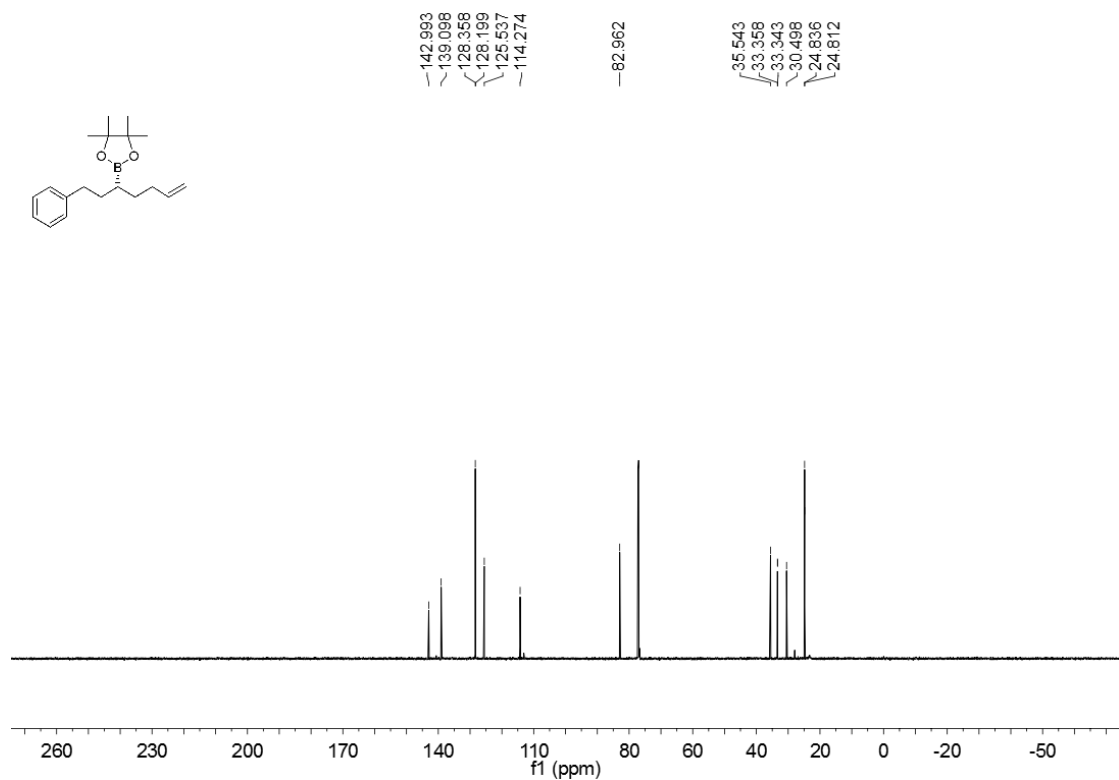

**$^{11}\text{B}$  NMR (193 MHz,  $\text{CD}_3\text{Cl}_3$ ) spectrum of  
(*R*)-4,4,5,5-tetramethyl-2-(1-phenylhept-6-en-3-yl)-1,3,2-dioxaborolane 5b**

—34.293

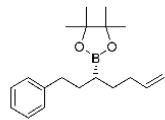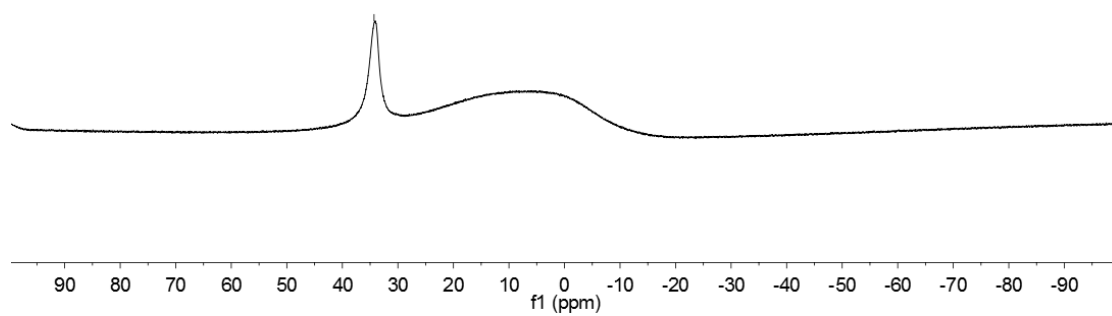

## HPLC spectrum of (R)-4,4,5,5-tetramethyl-2-(1-phenylhept-6-en-3-yl)-1,3,2-dioxaborolane 5b

HPLC (ODH, 0.46 × 25 cm, 5 μm, hexane/isopropanol = 9/1 (v/v %), flow 0.7 mL/min, UV detection at 214 nm)

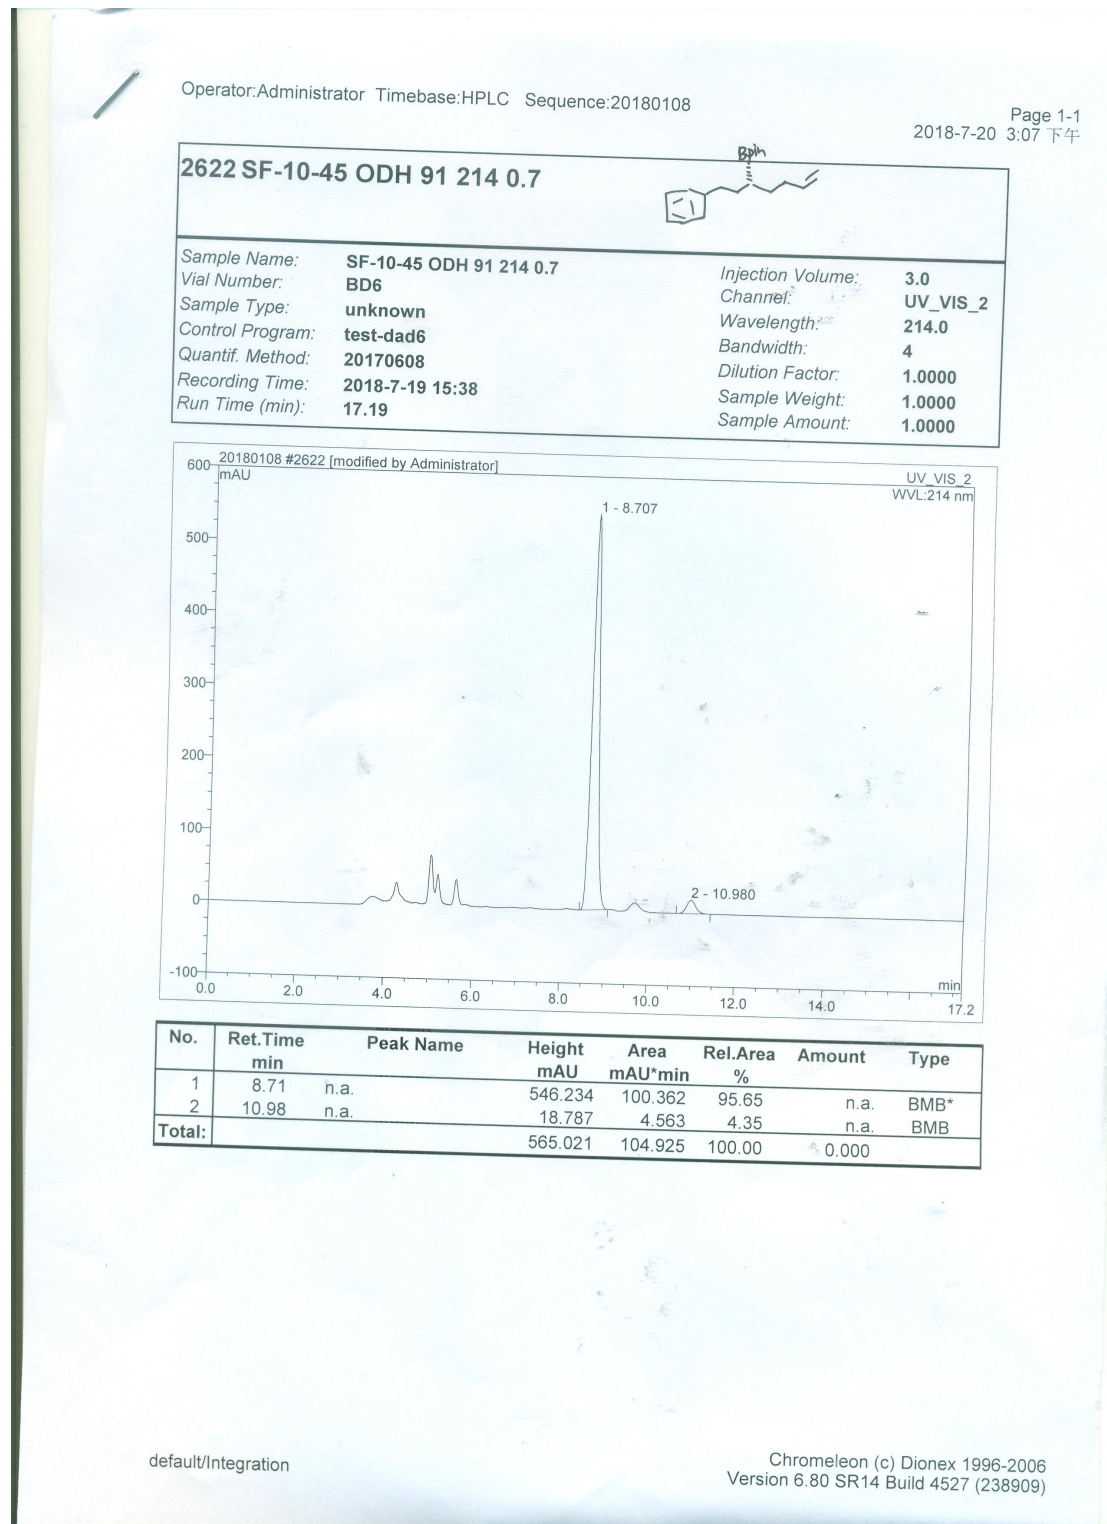

**2621 SF-10-45+- ODH 91 214 0.7**

|                  |                           |                   |          |
|------------------|---------------------------|-------------------|----------|
| Sample Name:     | SF-10-45+- ODH 91 214 0.7 | Injection Volume: | 3.0      |
| Vial Number:     | BC6                       | Channel:          | UV_VIS_2 |
| Sample Type:     | unknown                   | Wavelength:       | 214.0    |
| Control Program: | test-dad6                 | Bandwidth:        | 4        |
| Quantif. Method: | 20170608                  | Dilution Factor:  | 1.0000   |
| Recording Time:  | 2018-7-19 15:18           | Sample Weight:    | 1.0000   |
| Run Time (min):  | 18.95                     | Sample Amount:    | 1.0000   |

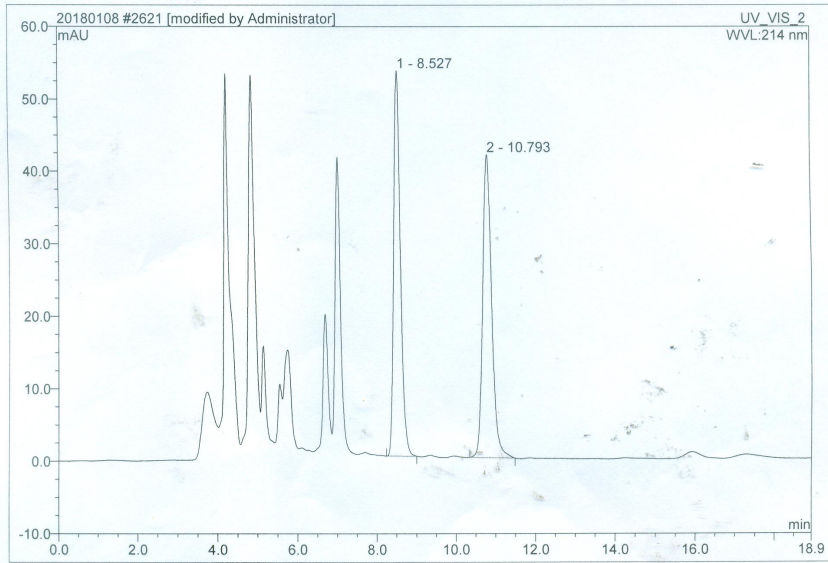

| No.           | Ret.Time<br>min | Peak Name | Height<br>mAU | Area<br>mAU*min | Rel.Area<br>% | Amount | Type |
|---------------|-----------------|-----------|---------------|-----------------|---------------|--------|------|
| 1             | 8.53            | n.a.      | 53.234        | 10.495          | 48.95         | n.a.   | BMB  |
| 2             | 10.79           | n.a.      | 41.825        | 10.945          | 51.05         | n.a.   | BMB  |
| <b>Total:</b> |                 |           | 95.059        | 21.440          | 100.00        | 0.000  |      |

**<sup>1</sup>H NMR (500 MHz, CDCl<sub>3</sub>) spectrum of (S)-2-(1-cyclopropyl-3-phenylpropyl)-4,4,5,5-tetramethyl-1,3,2-dioxaborolane 5c**

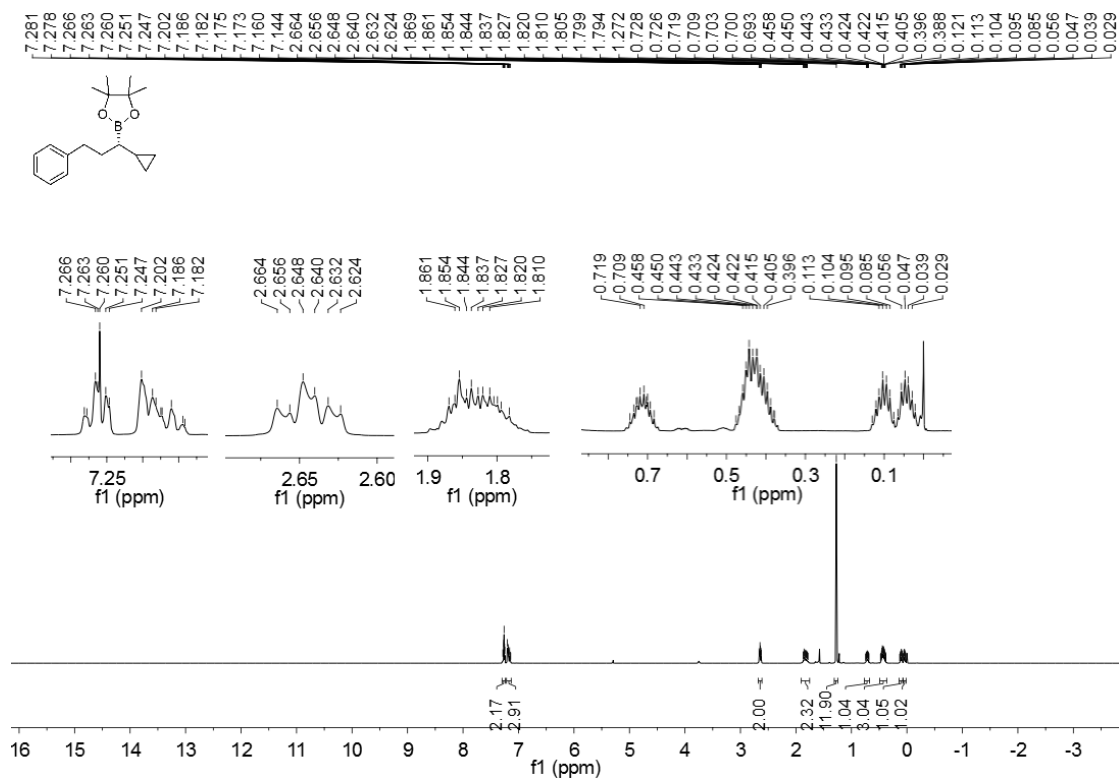

**<sup>13</sup>C NMR (126 MHz, CDCl<sub>3</sub>) spectrum of (S)-2-(1-cyclopropyl-3-phenylpropyl)-4,4,5,5-tetramethyl-1,3,2-dioxaborolane 5c**

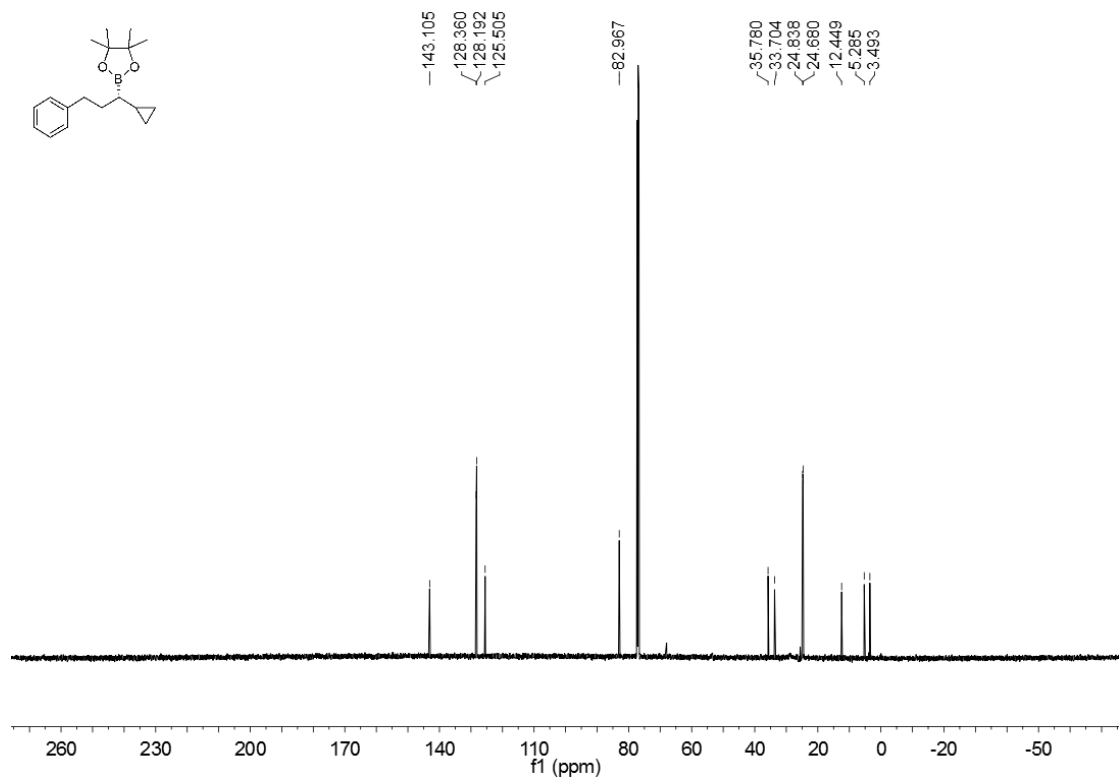

**$^{11}\text{B}$  NMR (160 MHz,  $\text{CD}_3\text{Cl}_3$ ) spectrum of  
(*S*)-2-(1-cyclopropyl-3-phenylpropyl)-4,4,5,5-tetramethyl-1,3,2-dioxaborolane 5c**

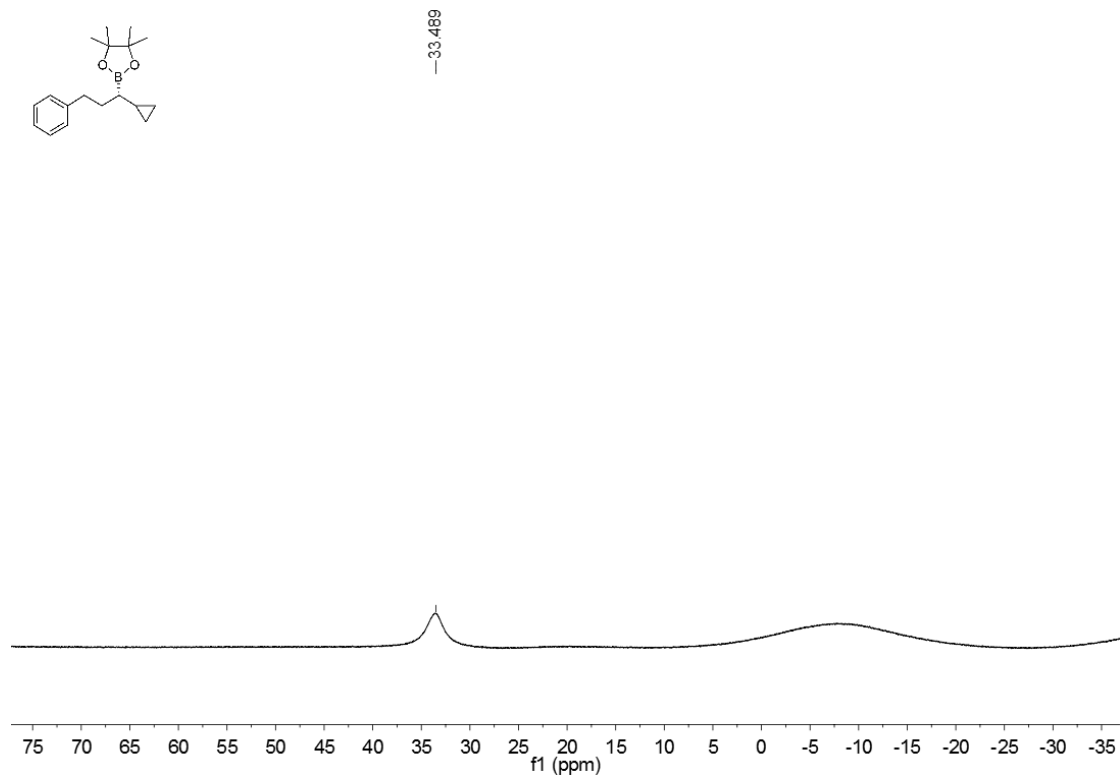

# HPLC spectrum of (S)-2-(1-cyclopropyl-3-phenylpropyl)-4,4,5,5-tetramethyl-1,3,2-dioxaborolane 5c

HPLC (C1, 0.46 × 25 cm, 5 μm, carbon dioxide/isopropanol = 95/5 (v/v %), flow 2.0 mL/min, UV detection at 214 nm, 2000 psi, 40 °C)

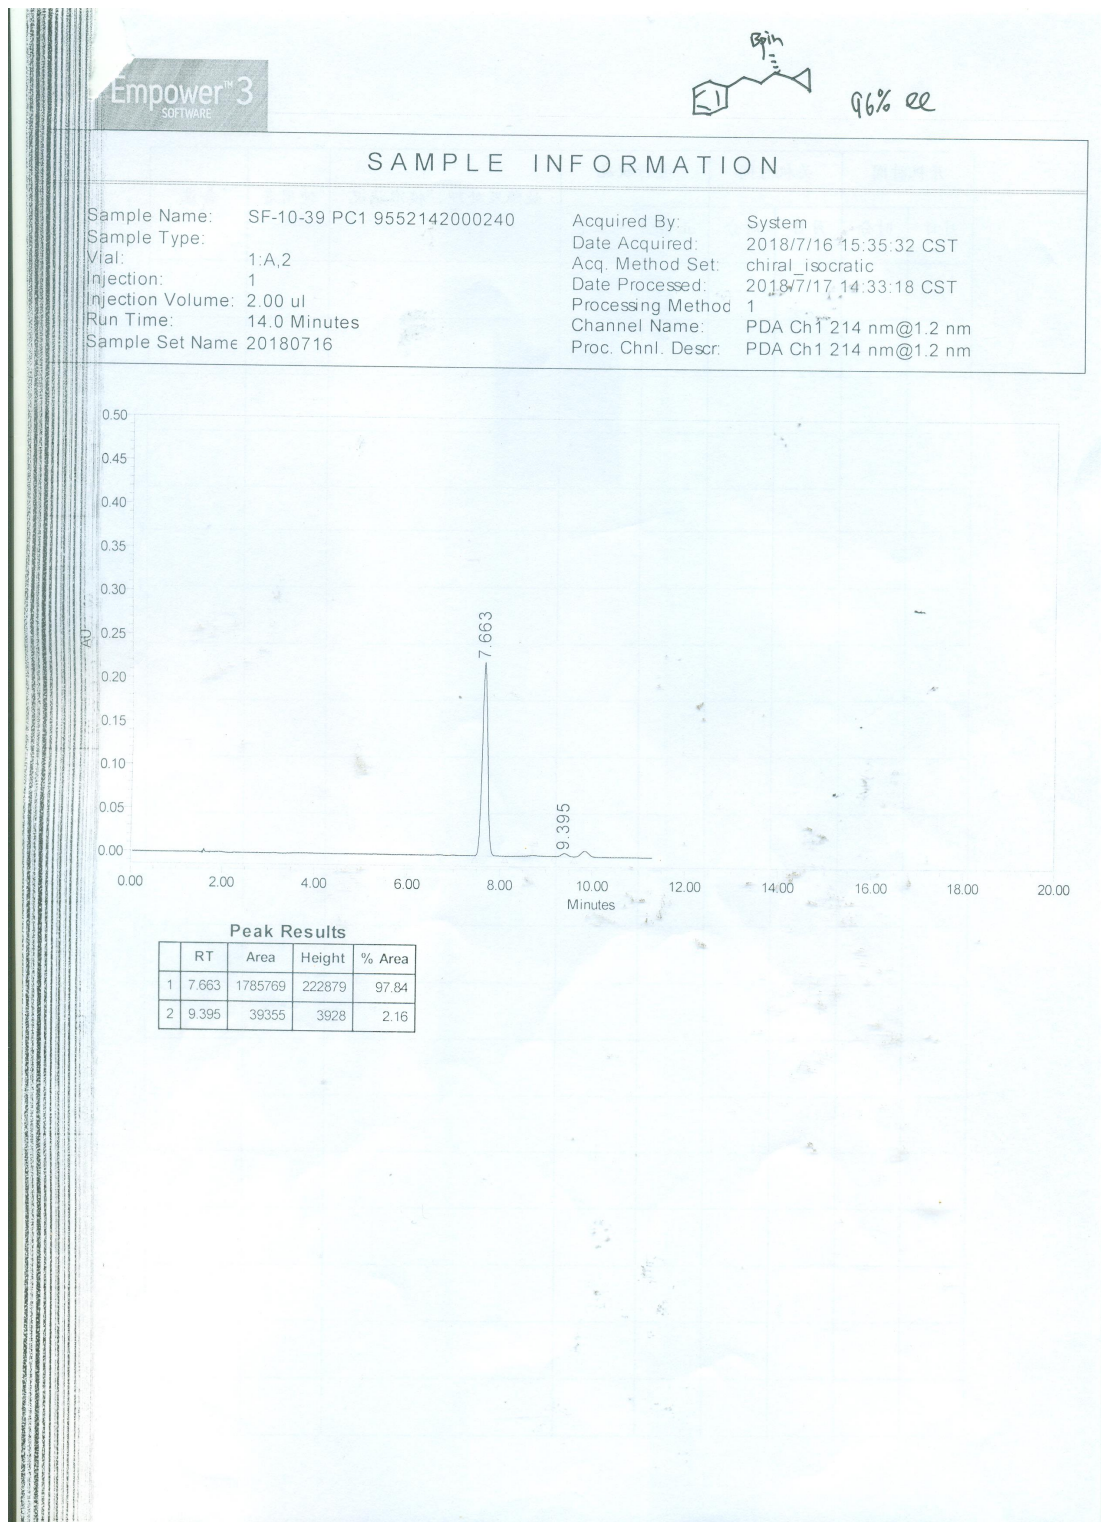



SAMPLE INFORMATION

|                   |                              |                    |                        |
|-------------------|------------------------------|--------------------|------------------------|
| Sample Name:      | SF-10-39+- PC1 9552142000240 | Acquired By:       | System                 |
| Sample Type:      |                              | Date Acquired:     | 2018/7/16 15:20:40 CST |
| Vial:             | 1:A,1                        | Acq. Method Set:   | chiral_isocratic       |
| Injection:        | 1                            | Date Processed:    | 2018/7/17 14:32:52 CST |
| Injection Volume: | 2.00 ul                      | Processing Method: | 1                      |
| Run Time:         | 14.0 Minutes                 | Channel Name:      | PDA Ch1-214 nm@1.2 nm  |
| Sample Set Name:  | 20180716                     | Proc. Chnl. Descr: | PDA Ch1 214 nm@1.2 nm  |

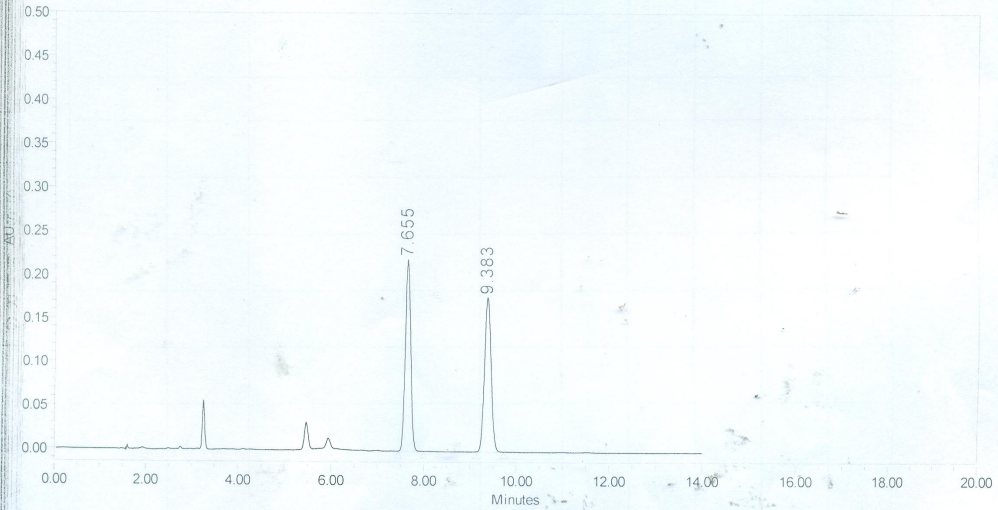

Peak Results

| RT      | Area    | Height | % Area |
|---------|---------|--------|--------|
| 1 7.655 | 1779014 | 220537 | 50.05  |
| 2 9.383 | 1775747 | 177741 | 49.95  |

**<sup>1</sup>H NMR (400 MHz, CDCl<sub>3</sub>) spectrum of  
(S)-1-(difluoromethylthio)-5-methyl-3-phenethylhexan-2-one 6a**

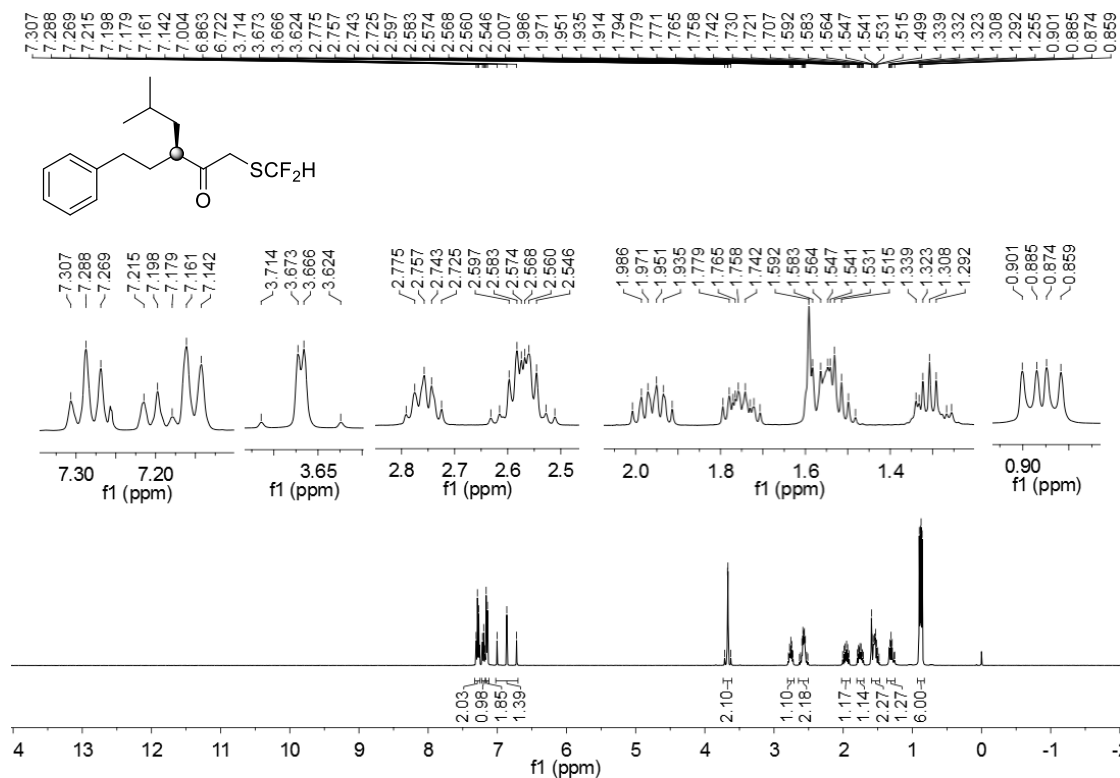

**<sup>13</sup>C NMR (151 MHz, CDCl<sub>3</sub>) spectrum of  
(S)-1-(difluoromethylthio)-5-methyl-3-phenethylhexan-2-one 6a**

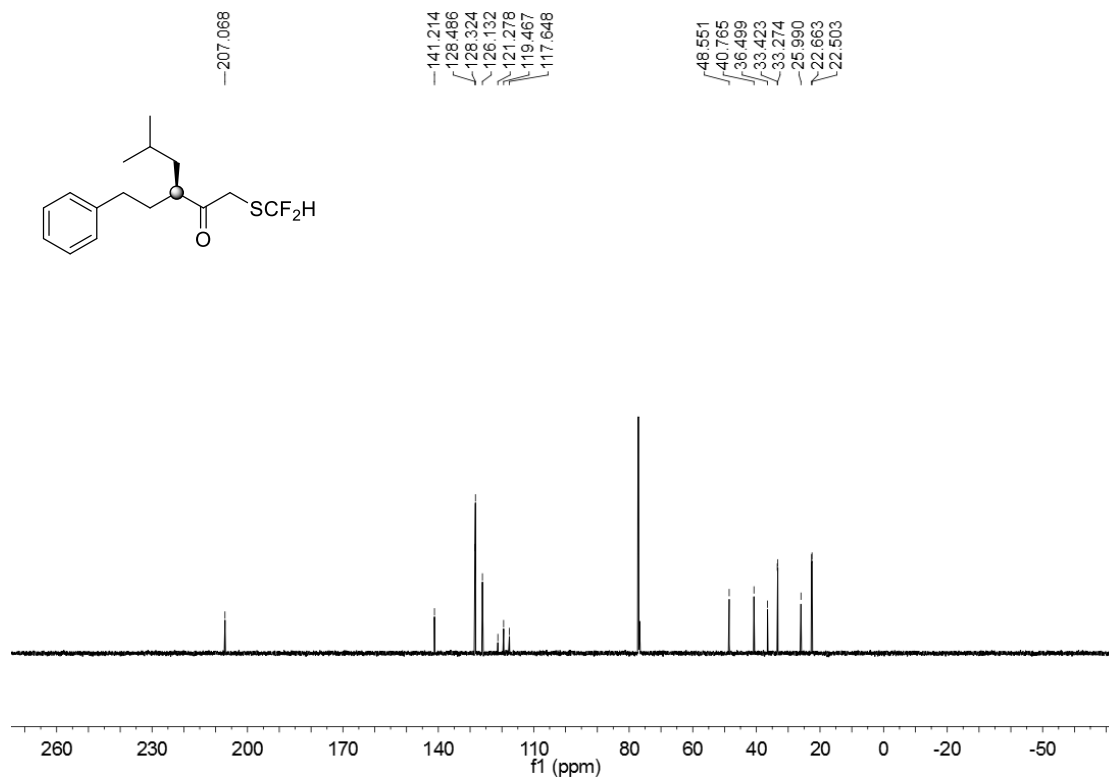

**<sup>19</sup>F NMR (376 MHz, CDCl<sub>3</sub>) spectrum of  
(S)-1-(difluoromethylthio)-5-methyl-3-phenethylhexan-2-one 6a**

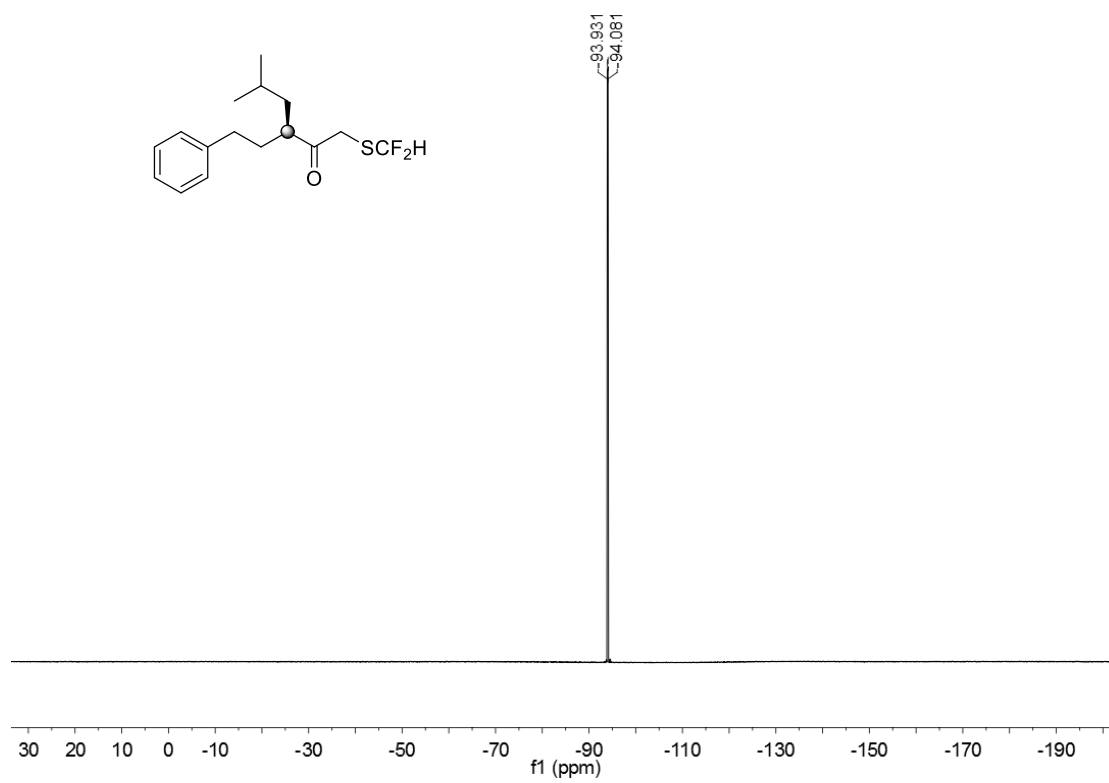

HPLC spectrum of  
**(S)-1-(difluoromethylthio)-5-methyl-3-phenethylhexan-2-one 6a**

HPLC (AY3, 0.46 × 15 cm, 3 μm, hexane/isopropanol = 95/5 (v/v %), flow 0.7 mL/min, UV detection at 214 nm)

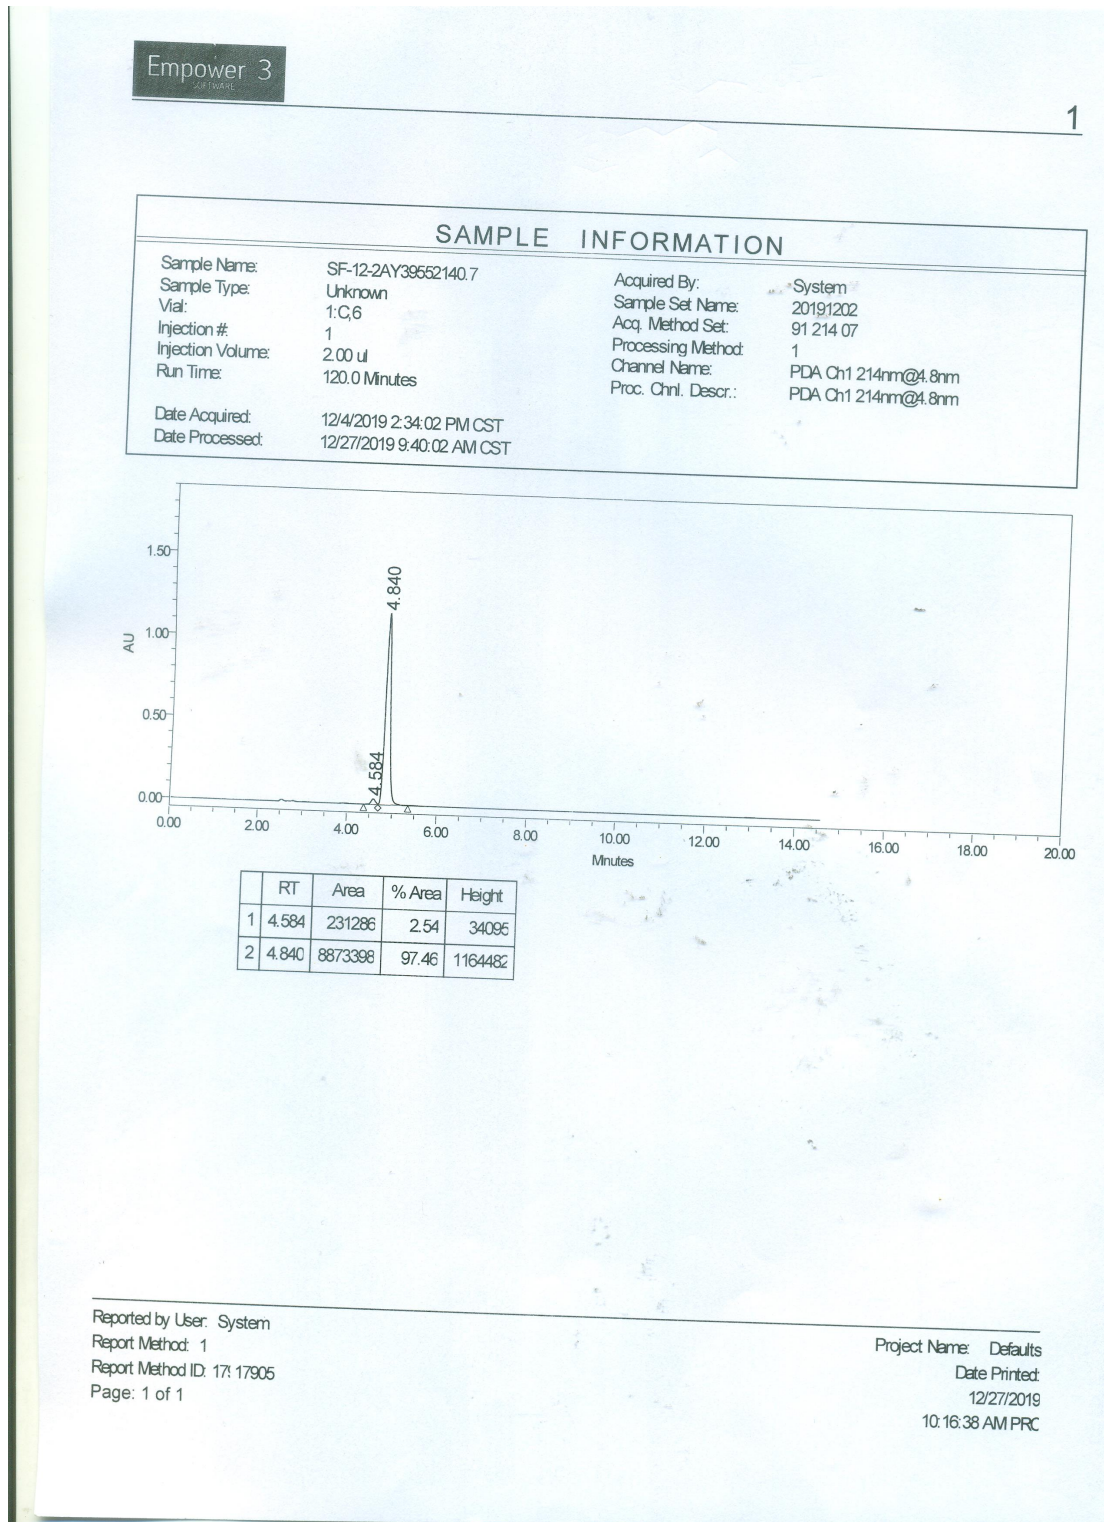

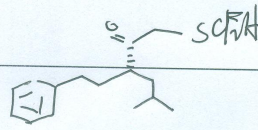

SAMPLE INFORMATION

|                   |                           |                     |                     |
|-------------------|---------------------------|---------------------|---------------------|
| Sample Name:      | SF-12-2+-AY39552140.7     | Acquired By:        | System              |
| Sample Type:      | Unknown                   | Sample Set Name:    | 20191202            |
| Vial:             | 1;C;5                     | Acq. Method Set:    | 91 214 07           |
| Injection #:      | 1                         | Processing Method:  | 1                   |
| Injection Volume: | 2.00 ul                   | Channel Name:       | PDA Ch1 214nm@4.8nm |
| Run Time:         | 120.0 Minutes             | Proc. Chnl. Descr.: | PDA Ch1 214nm@4.8nm |
| Date Acquired:    | 12/4/2019 2:14:28 PM CST  |                     |                     |
| Date Processed:   | 12/27/2019 9:39:37 AM CST |                     |                     |

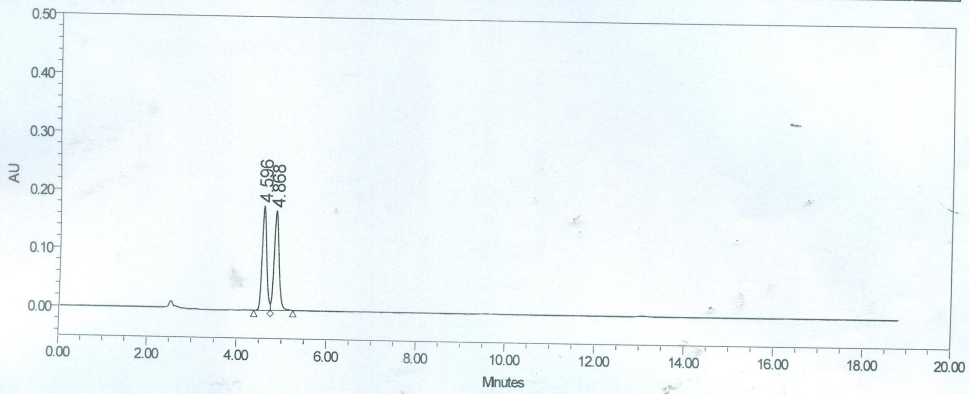

|   | RT    | Area    | % Area | Height |
|---|-------|---------|--------|--------|
| 1 | 4.596 | 1249816 | 49.13  | 178796 |
| 2 | 4.868 | 1293888 | 50.87  | 170215 |

**<sup>1</sup>H NMR (400 MHz, CDCl<sub>3</sub>) spectrum of  
(*R*)-1-(difluoromethylthio)-3-phenethylhept-6-en-2-one 6b**

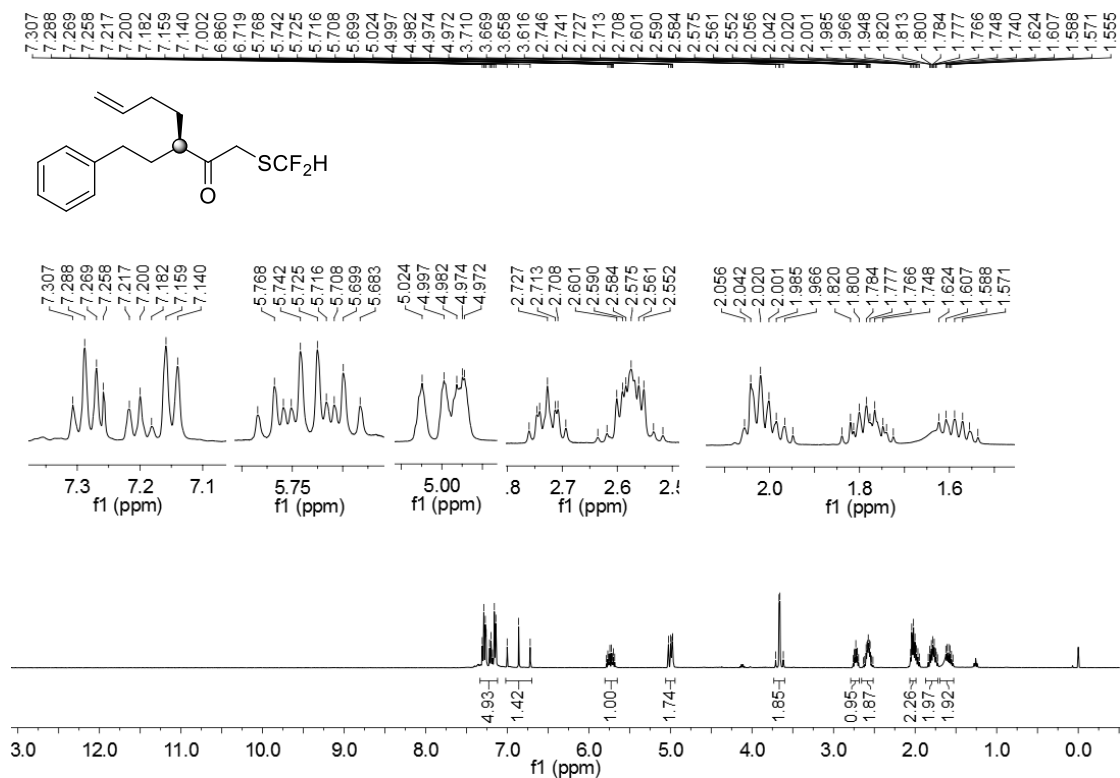

**<sup>13</sup>C NMR (151 MHz, CDCl<sub>3</sub>) spectrum of  
(*R*)-1-(difluoromethylthio)-3-phenethylhept-6-en-2-one 6b**

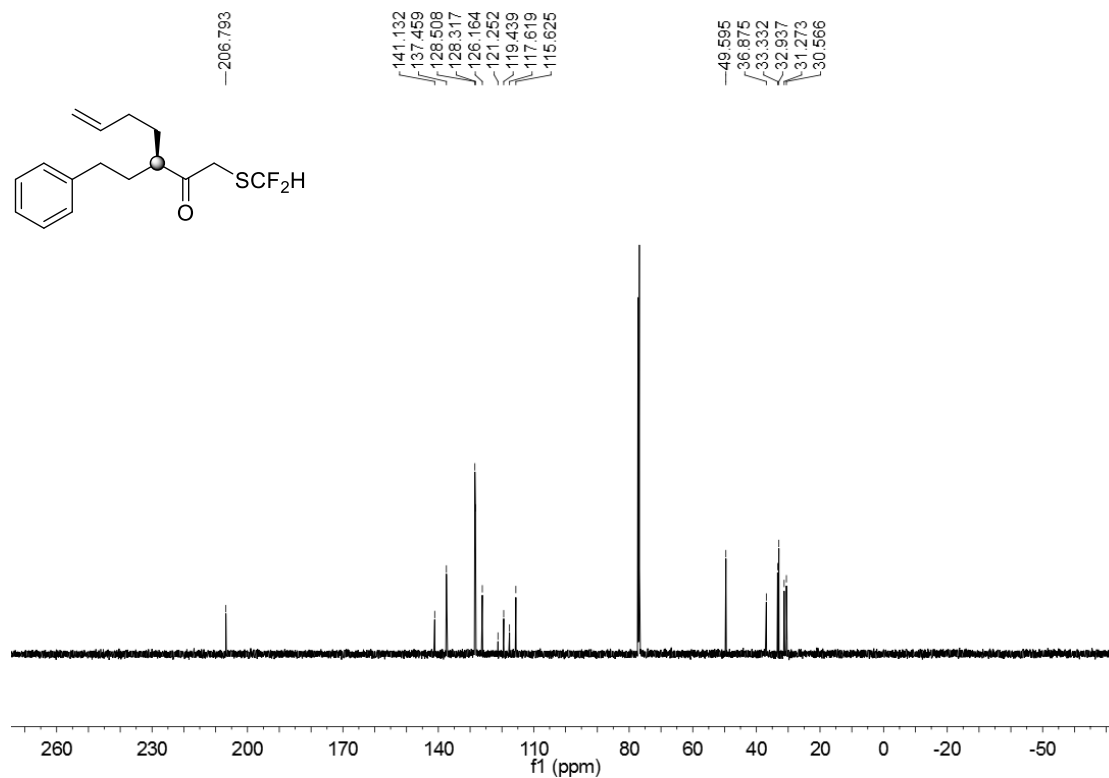

**$^{19}\text{F}$  NMR (376 MHz,  $\text{CDCl}_3$ ) spectrum of  
(*R*)-1-(difluoromethylthio)-3-phenethylhept-6-en-2-one 6b**

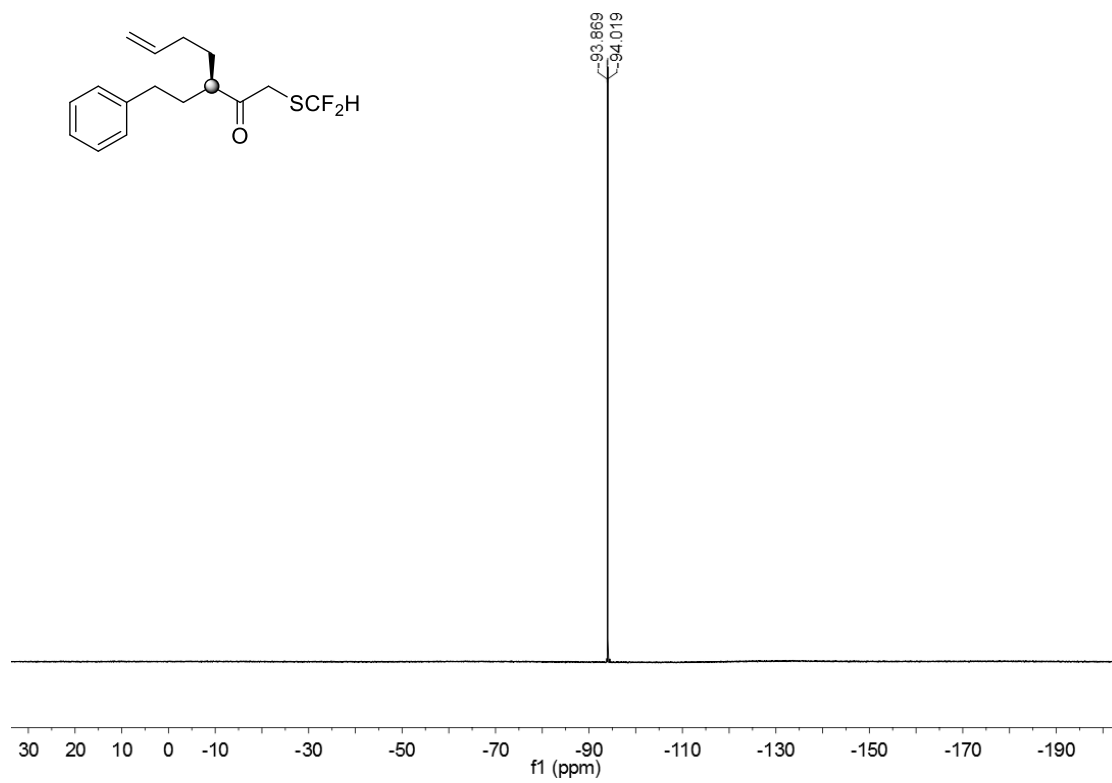

## HPLC spectrum of (R)-1-(difluoromethylthio)-3-phenethylhept-6-en-2-one 6b

HPLC (ODH, 0.46 × 25 cm, 5 μm, hexane/isopropanol = 95/5 (v/v %), flow 0.7 mL/min, UV detection at 214 nm)

Operator:Administrator Timebase:HPLC Sequence:20180108

Page 1-1  
2019-12-27 9:49 上午

7752 SF-12-6 ODH 955 214 0.7

|                  |                         |                   |          |
|------------------|-------------------------|-------------------|----------|
| Sample Name:     | SF-12-6 ODH 955 214 0.7 | Injection Volume: | 3.0      |
| Vial Number:     | RD7                     | Channel:          | UV_VIS_2 |
| Sample Type:     | unknown                 | Wavelength:       | 214.0    |
| Control Program: | test-dad4               | Bandwidth:        | 4        |
| Quantif. Method: | 20170608                | Dilution Factor:  | 1.0000   |
| Recording Time:  | 2019-12-9 12:13         | Sample Weight:    | 1.0000   |
| Run Time (min):  | 25.46                   | Sample Amount:    | 1.0000   |

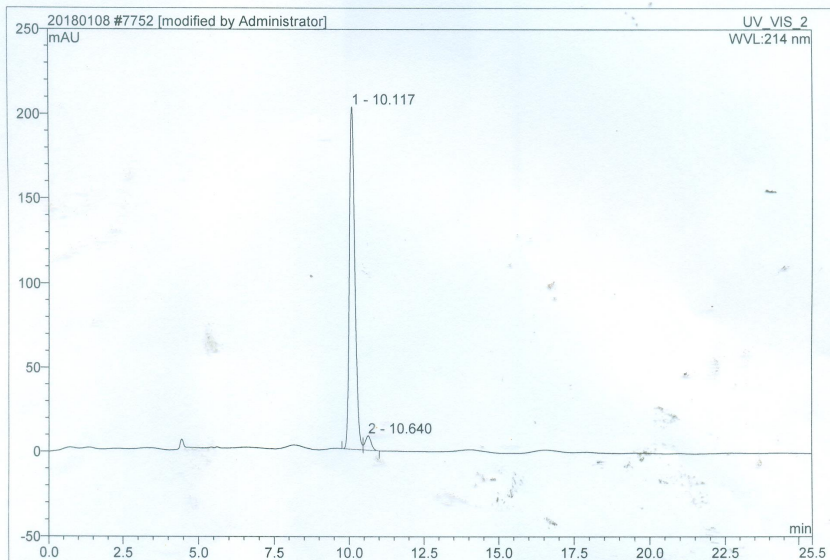

| No.           | Ret.Time<br>min | Peak Name | Height<br>mAU | Area<br>mAU*min | Rel.Area<br>% | Amount | Type |
|---------------|-----------------|-----------|---------------|-----------------|---------------|--------|------|
| 1             | 10.12           | n.a.      | 202.781       | 43.308          | 95.61         | n.a.   | BM   |
| 2             | 10.64           | n.a.      | 8.623         | 1.991           | 4.39          | n.a.   | MB   |
| <b>Total:</b> |                 |           | 211.403       | 45.298          | 100.00        | 0.000  |      |

default/Integration

Chromeleon (c) Dionex 1996-2006  
Version 6.80 SR14 Build 4527 (238909)



7751 SF-12-6+- ODH 955 214 0.7

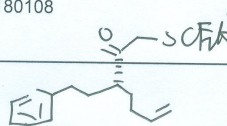

|                  |                           |                   |          |
|------------------|---------------------------|-------------------|----------|
| Sample Name:     | SF-12-6+- ODH 955 214 0.7 | Injection Volume: | 3.0      |
| Vial Number:     | RD6                       | Channel:          | UV_VIS_2 |
| Sample Type:     | unknown                   | Wavelength:       | 214.0    |
| Control Program: | test-dad4                 | Bandwidth:        | 4        |
| Quantif. Method: | 20170608                  | Dilution Factor:  | 1.0000   |
| Recording Time:  | 2019-12-9 11:54           | Sample Weight:    | 1.0000   |
| Run Time (min):  | 17.20                     | Sample Amount:    | 1.0000   |

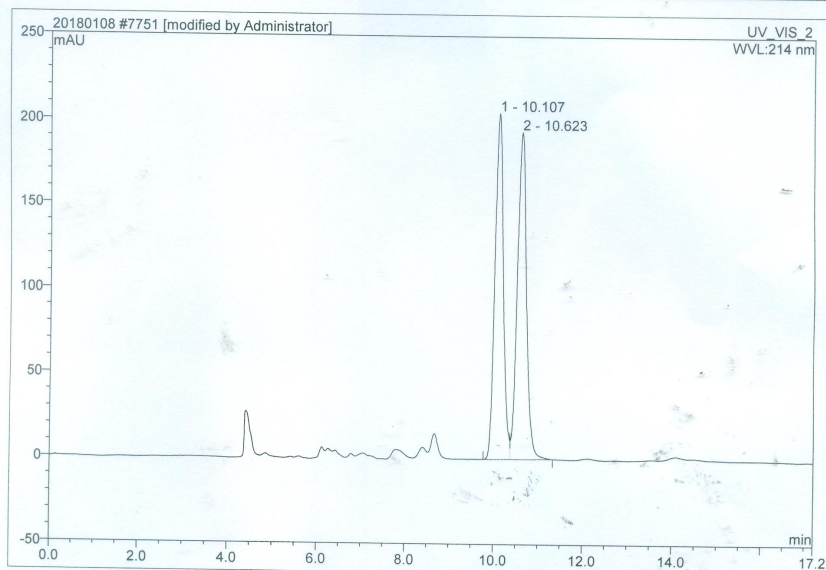

| No.           | Ret.Time<br>min | Peak Name | Height<br>mAU | Area<br>mAU*min | Rel.Area<br>% | Amount | Type |
|---------------|-----------------|-----------|---------------|-----------------|---------------|--------|------|
| 1             | 10.11           | n.a.      | 204.681       | 45.129          | 49.33         | n.a.   | BM   |
| 2             | 10.62           | n.a.      | 193.563       | 46.351          | 50.67         | n.a.   | MB   |
| <b>Total:</b> |                 |           | 398.244       | 91.480          | 100.00        | 0.000  |      |

**<sup>1</sup>H NMR (500 MHz, CDCl<sub>3</sub>) spectrum of  
(S)-3-cyclopropyl-1-(difluoromethylthio)-5-phenylpentan-2-one 6c**

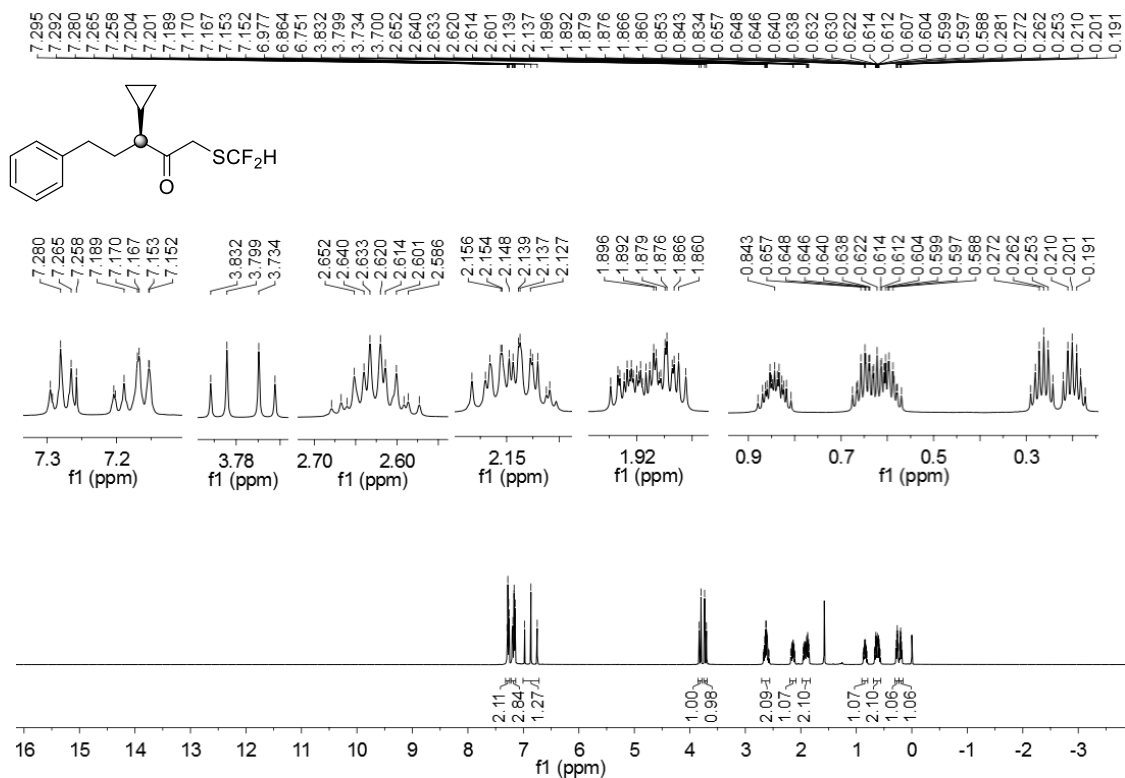

**<sup>13</sup>C NMR (126 MHz, CDCl<sub>3</sub>) spectrum of  
(S)-3-cyclopropyl-1-(difluoromethylthio)-5-phenylpentan-2-one 6c**

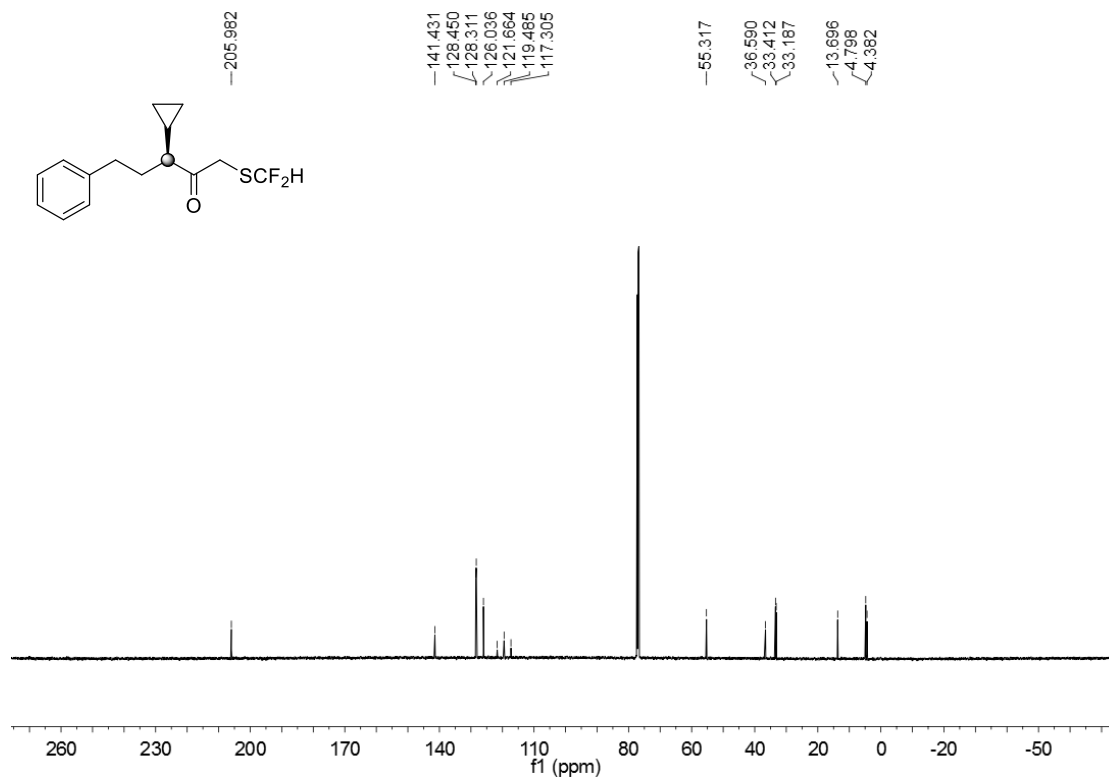

**$^{19}\text{F}$  NMR (471 MHz,  $\text{CDCl}_3$ ) spectrum of  
(*S*)-3-cyclopropyl-1-(difluoromethylthio)-5-phenylpentan-2-one 6c**

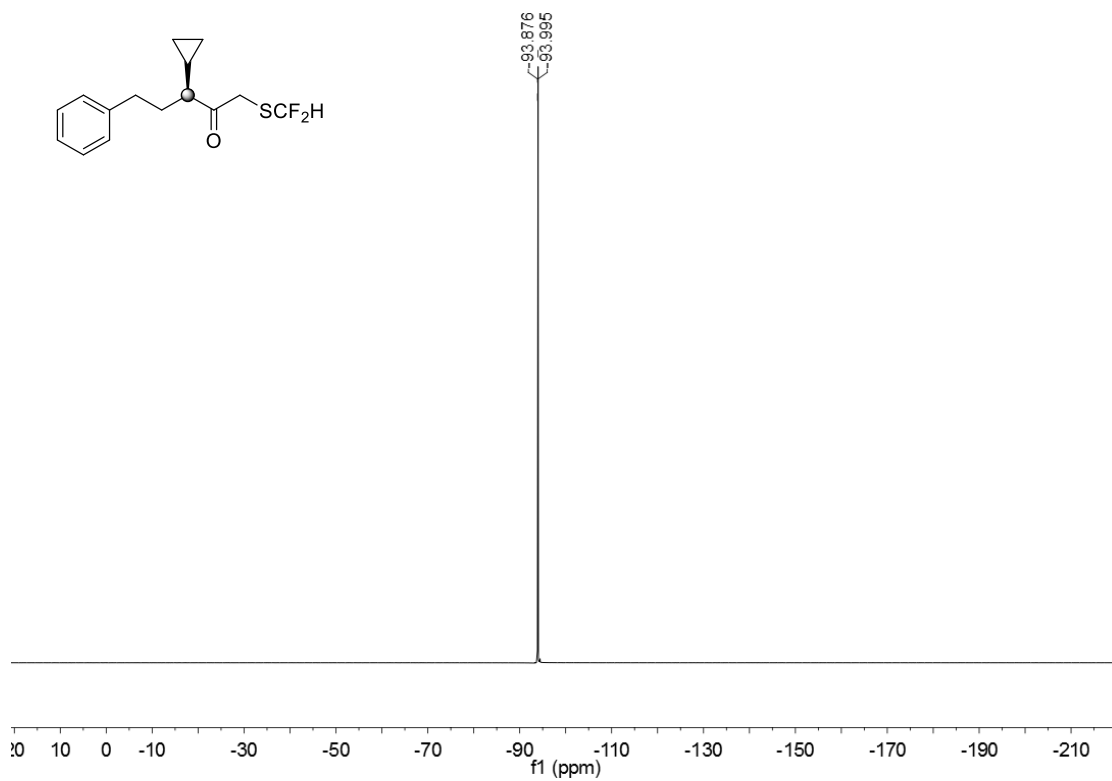

**HPLC spectrum of  
(S)-3-cyclopropyl-1-(difluoromethylthio)-5-phenylpentan-2-one 6c**

HPLC (ADH, 0.46 × 25 cm, 5 μm, hexane/isopropanol = 98/2 (v/v %), flow 0.7 mL/min, UV detection at 214 nm)

Operator:GC Timebase:U3000 Sequence:WXL-6

Page 1-1  
2019/12/27 10:26 上午

#### 12-16DAY ADH 982 214 0.7

|                  |                          |                   |          |
|------------------|--------------------------|-------------------|----------|
| Sample Name:     | 12-16DAY ADH 982 214 0.7 | Injection Volume: | 3.0      |
| Vial Number:     | GC6                      | Channel:          | UV_VIS_1 |
| Sample Type:     | unknown                  | Wavelength:       | 214      |
| Control Program: | 201701-4                 | Bandwidth:        | n.a.     |
| Quantif. Method: | 201701                   | Dilution Factor:  | 1.0000   |
| Recording Time:  | 2019/12/20 12:05         | Sample Weight:    | 1.0000   |
| Run Time (min):  | 17.40                    | Sample Amount:    | 1.0000   |

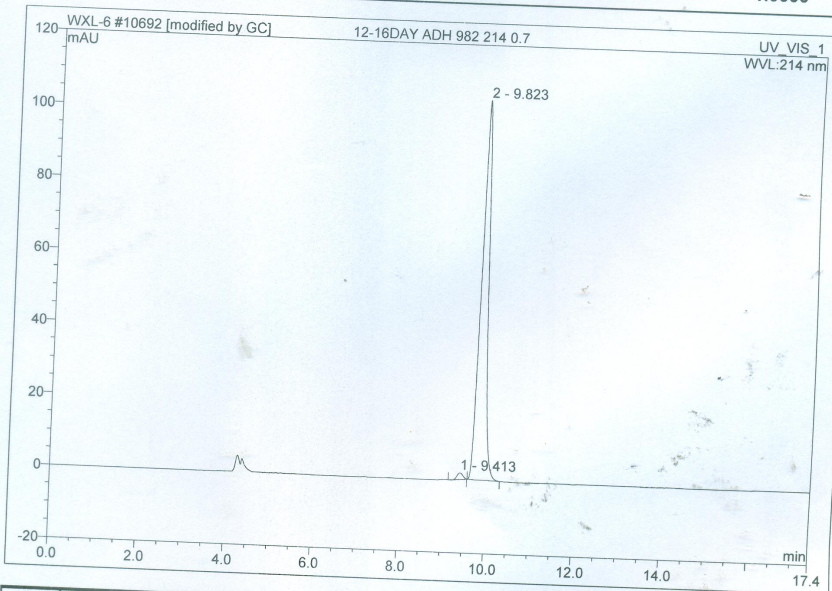

| No.           | Ret. Time min | Peak Name | Height mAU | Area mAU*min | Rel. Area % | Amount | Type |
|---------------|---------------|-----------|------------|--------------|-------------|--------|------|
| 1             | 9.41          | n.a.      | 1.859      | 0.273        | 1.35        | n.a.   | BMB* |
| 2             | 9.82          | n.a.      | 104.618    | 19.995       | 98.65       | n.a.   | BMB  |
| <b>Total:</b> |               |           | 106.477    | 20.268       | 100.00      | 0.000  |      |

DEFAULT/Integration

Chromeleon (c) Dionex 1996-2006  
Version 6.80 SR12 Build 3578 (207169)

SCFAT

#### 12-16DAY+- ADH 982 214 0.7

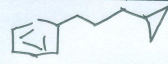

|                  |                            |                   |          |
|------------------|----------------------------|-------------------|----------|
| Sample Name:     | 12-16DAY+- ADH 982 214 0.7 | Injection Volume: | 3.0      |
| Vial Number:     | GD6                        | Channel:          | UV_VIS_1 |
| Sample Type:     | unknown                    | Wavelength:       | 214      |
| Control Program: | 201701-4                   | Bandwidth:        | n.a.     |
| Quantif. Method: | 201701                     | Dilution Factor:  | 1.0000   |
| Recording Time:  | 2019/12/20 12:26           | Sample Weight:    | 1.0000   |
| Run Time (min):  | 25.96                      | Sample Amount:    | 1.0000   |

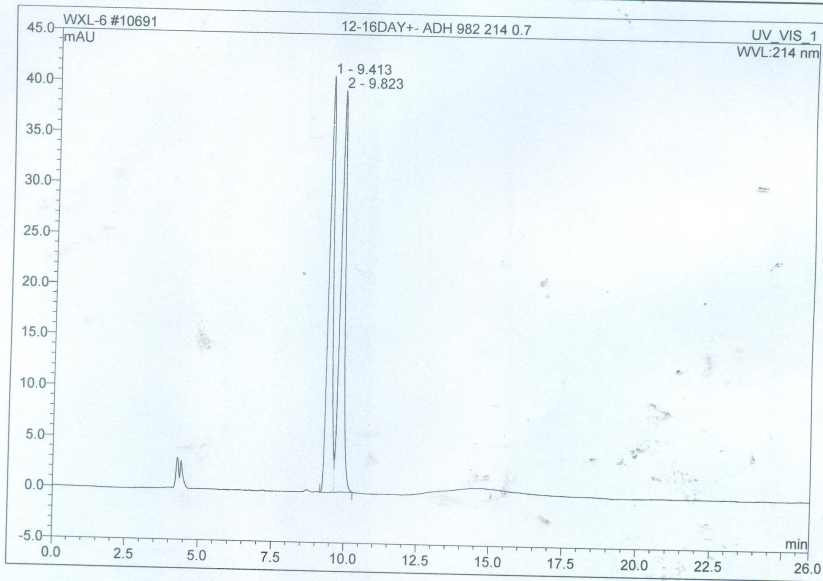

| No.           | Ret.Time<br>min | Peak Name | Height<br>mAU | Area<br>mAU*min | Rel.Area<br>% | Amount | Type |
|---------------|-----------------|-----------|---------------|-----------------|---------------|--------|------|
| 1             | 9.41            | n.a.      | 40.925        | 7.365           | 49.20         | n.a.   | BM   |
| 2             | 9.82            | n.a.      | 39.522        | 7.605           | 50.80         | n.a.   | MB   |
| <b>Total:</b> |                 |           | 80.447        | 14.970          | 100.00        | 0.000  |      |

**<sup>1</sup>H NMR (400 MHz, CDCl<sub>3</sub>) spectrum of 4,4,5,5-tetramethyl-2-(1-phenyl-2-(trifluoromethylthio)ethyl)-1,3,2-dioxaborolane 8a**

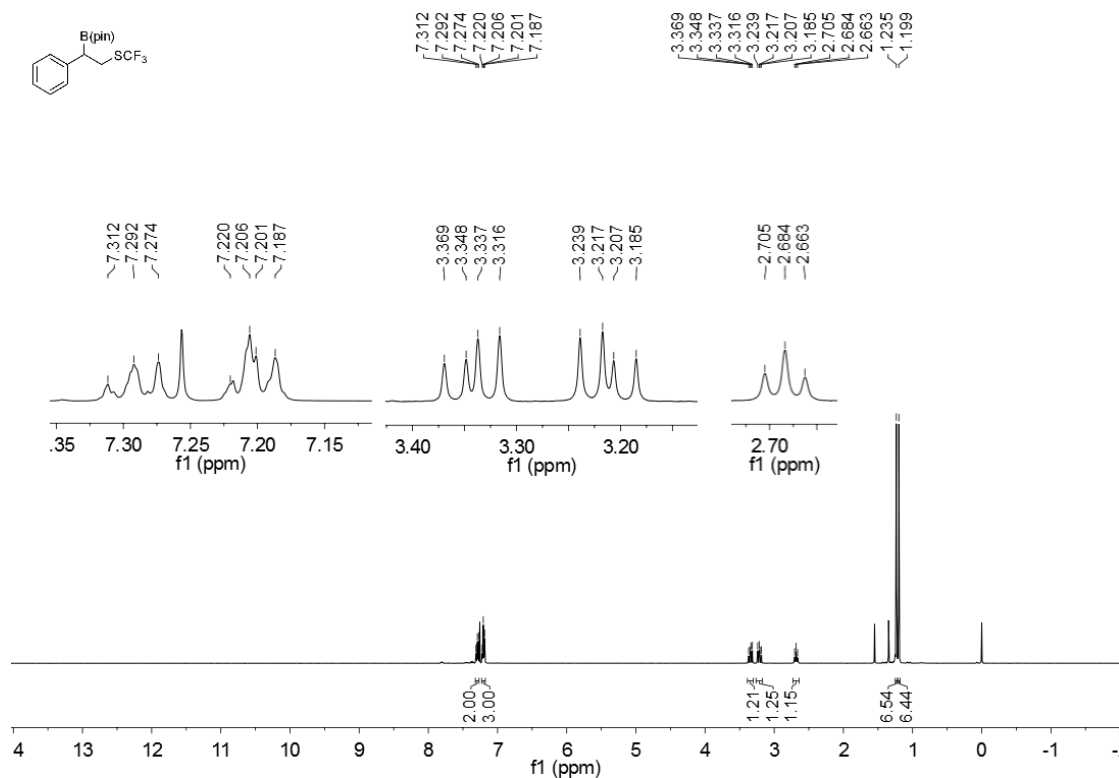

**<sup>13</sup>C NMR (101 MHz, CDCl<sub>3</sub>) spectrum of 4,4,5,5-tetramethyl-2-(1-phenyl-2-(trifluoromethylthio)ethyl)-1,3,2-dioxaborolane 8a**

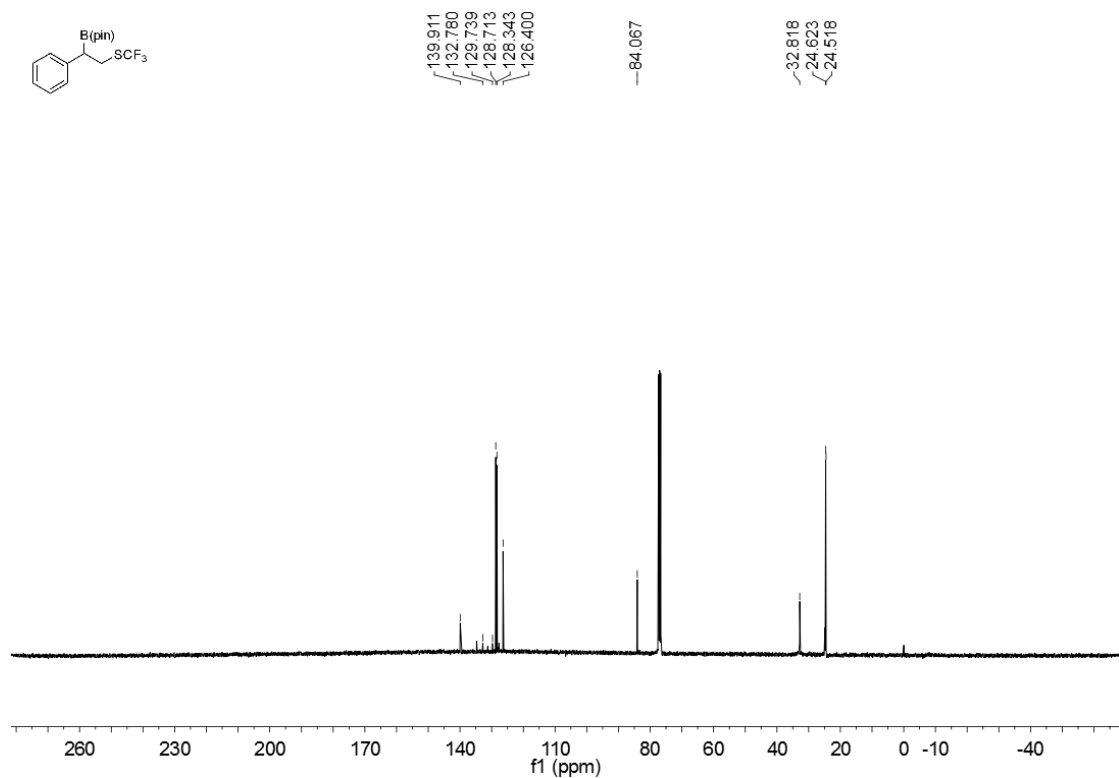

**$^{19}\text{F}$  NMR (376 MHz,  $\text{CDCl}_3$ ) spectrum of 4,4,5,5-tetramethyl-2-(1-phenyl-2-(trifluoromethylthio)ethyl)-1,3,2-dioxaborolane 8a**

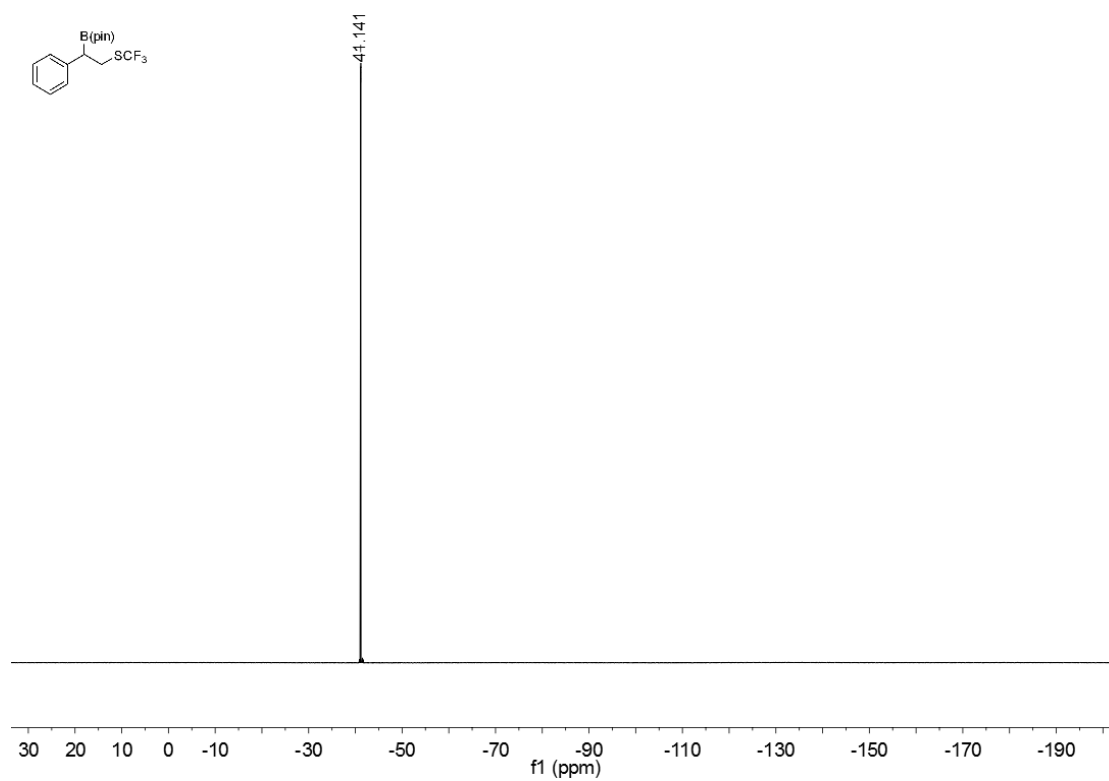

**$^{11}\text{B}$  NMR (128 MHz,  $\text{CD}_3\text{Cl}_3$ ) spectrum of 4,4,5,5-tetramethyl-2-(1-phenyl-2-(trifluoromethylthio)ethyl)-1,3,2-dioxaborolane 8a**

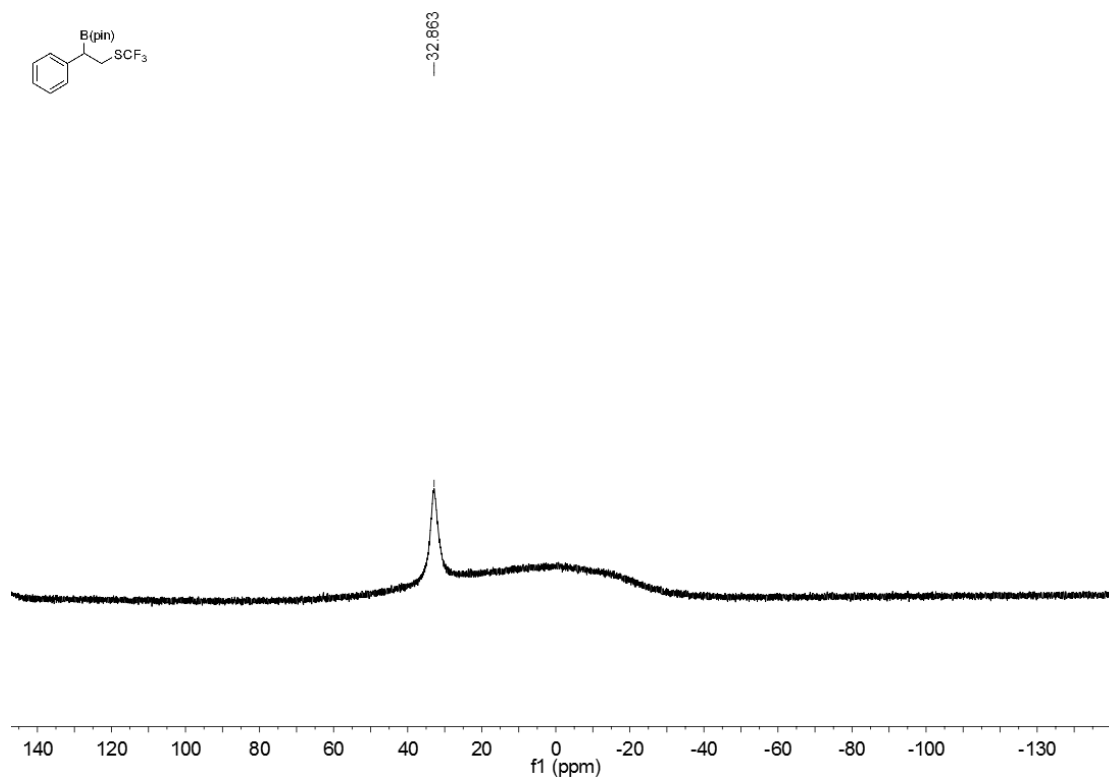

**<sup>1</sup>H NMR (400 MHz, CDCl<sub>3</sub>) spectrum of 2-(1-(4-chlorophenyl)-2-(trifluoromethylthio)ethyl)-4,4,5,5-tetramethyl-1,3,2-dioxaborolane 8b**

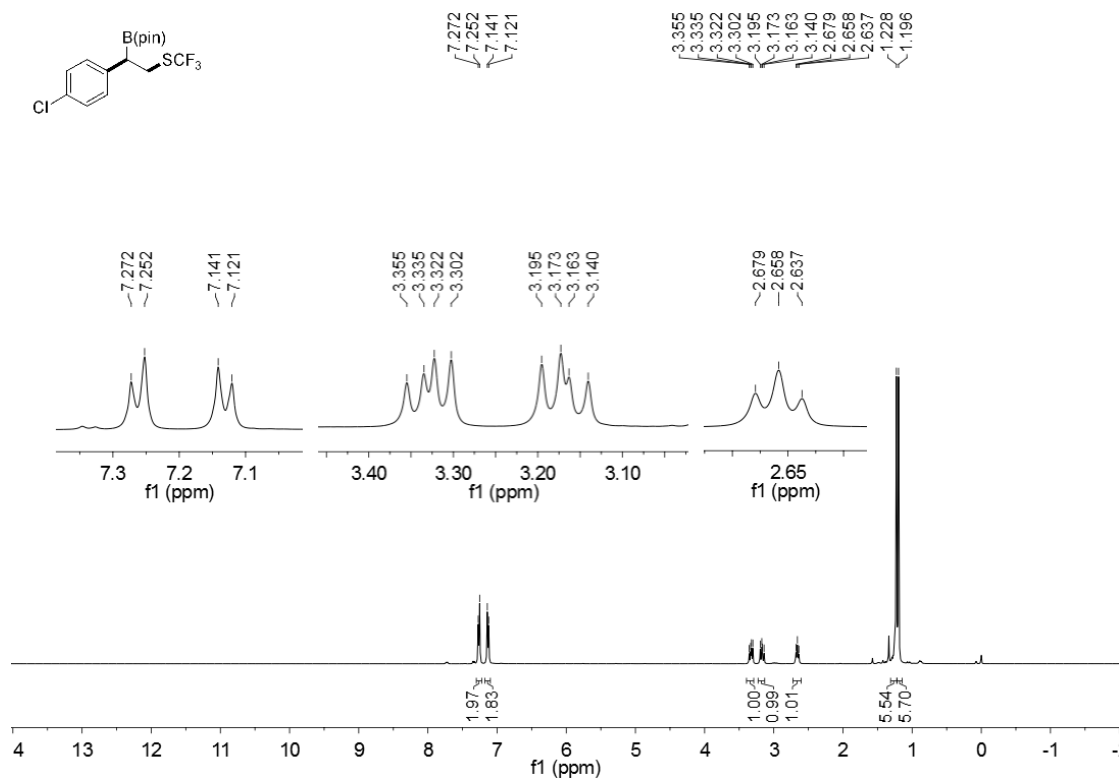

**<sup>13</sup>C NMR (101 MHz, CDCl<sub>3</sub>) spectrum of 2-(1-(4-chlorophenyl)-2-(trifluoromethylthio)ethyl)-4,4,5,5-tetramethyl-1,3,2-dioxaborolane 8b**

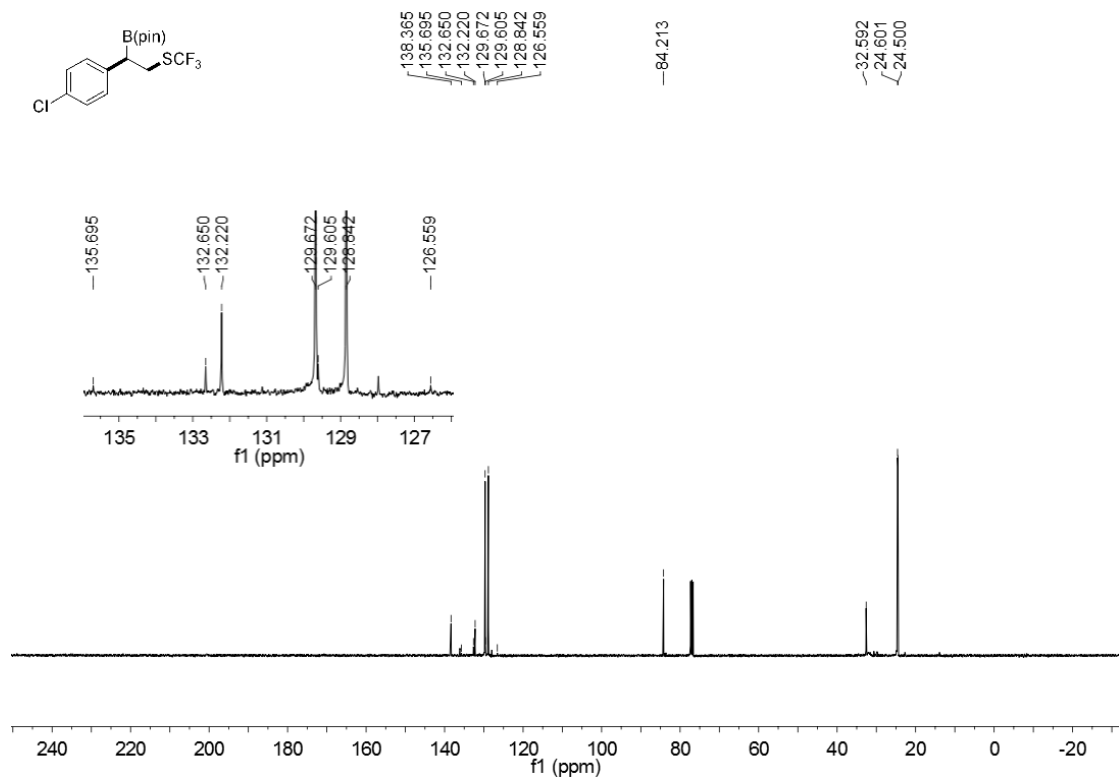



**$^{19}\text{F}$  NMR (376 MHz,  $\text{CDCl}_3$ ) spectrum of 2-(1-(4-chlorophenyl)-2-(trifluoromethylthio)ethyl)-4,4,5,5-tetramethyl-1,3,2-dioxaborolane 8b**

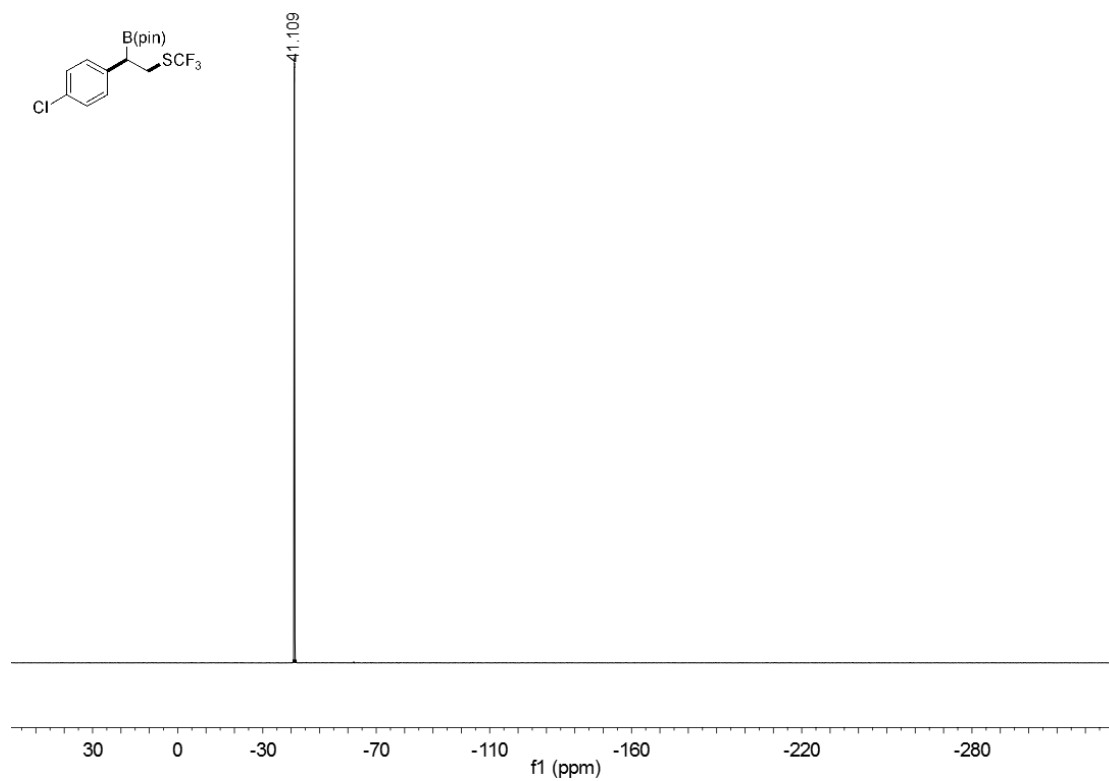

**$^{11}\text{B}$  NMR (128 MHz,  $\text{CD}_3\text{Cl}_3$ ) spectrum of 2-(1-(4-chlorophenyl)-2-(trifluoromethylthio)ethyl)-4,4,5,5-tetramethyl-1,3,2-dioxaborolane 8b**

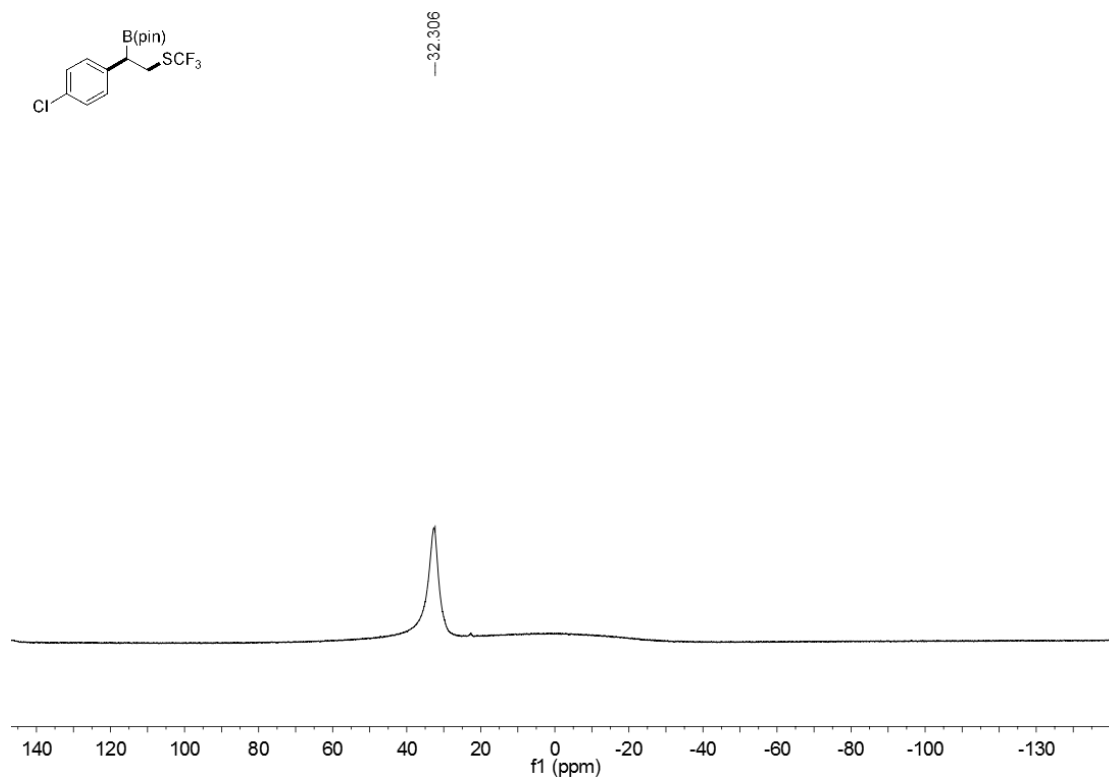

**<sup>1</sup>H NMR (400 MHz, CDCl<sub>3</sub>) spectrum of 4,4,5,5-tetramethyl-2-(1-(4-(trifluoromethyl)phenyl)-2-(trifluoromethylthio)ethyl)-1,3,2-dioxaborolane 8c**

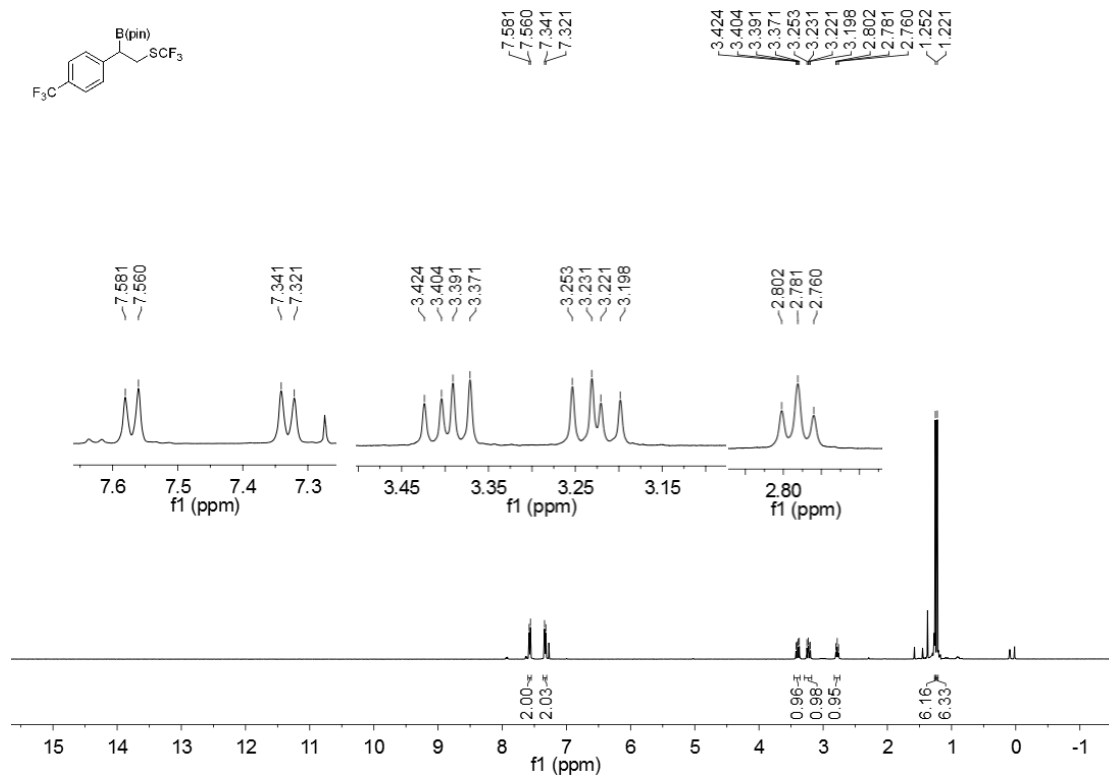

**<sup>13</sup>C NMR (101 MHz, CDCl<sub>3</sub>) spectrum of 4,4,5,5-tetramethyl-2-(1-(4-(trifluoromethyl)phenyl)-2-(trifluoromethylthio)ethyl)-1,3,2-dioxaborolane 8c**

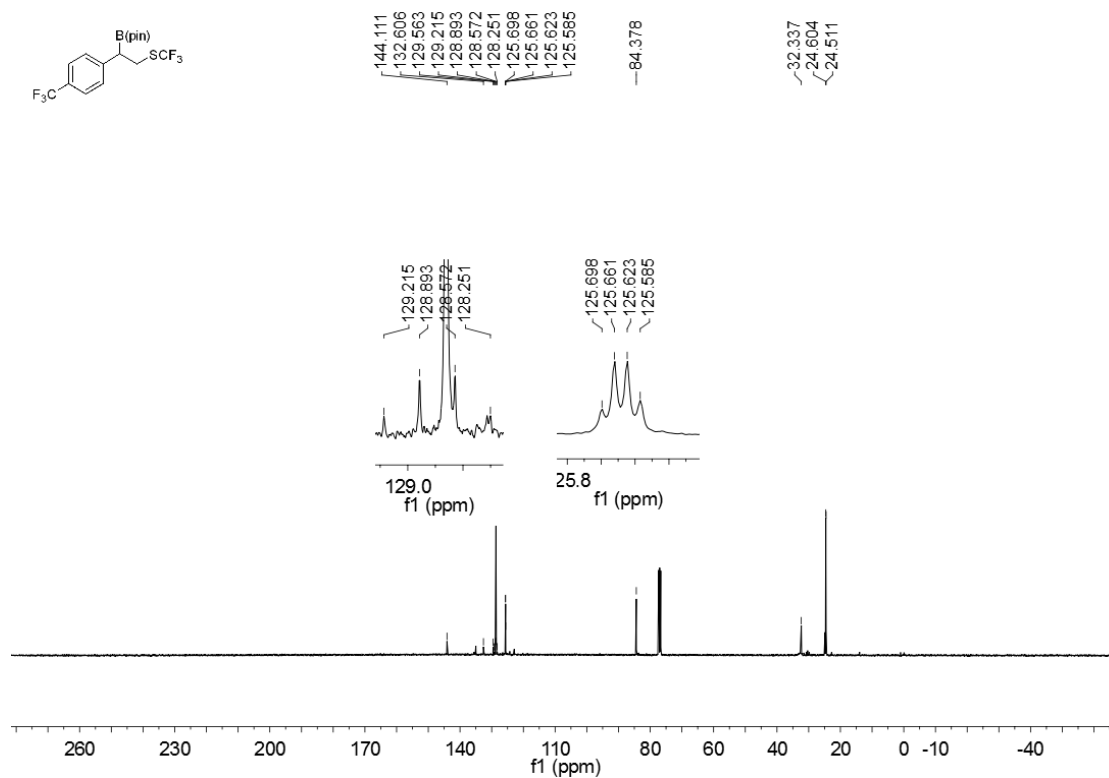

**$^{19}\text{F}$  NMR (376 MHz,  $\text{CDCl}_3$ ) spectrum of 4,4,5,5-tetramethyl-2-(1-(4-(trifluoromethyl)phenyl)-2-(trifluoromethylthio)ethyl)-1,3,2-dioxaborolane 8c**

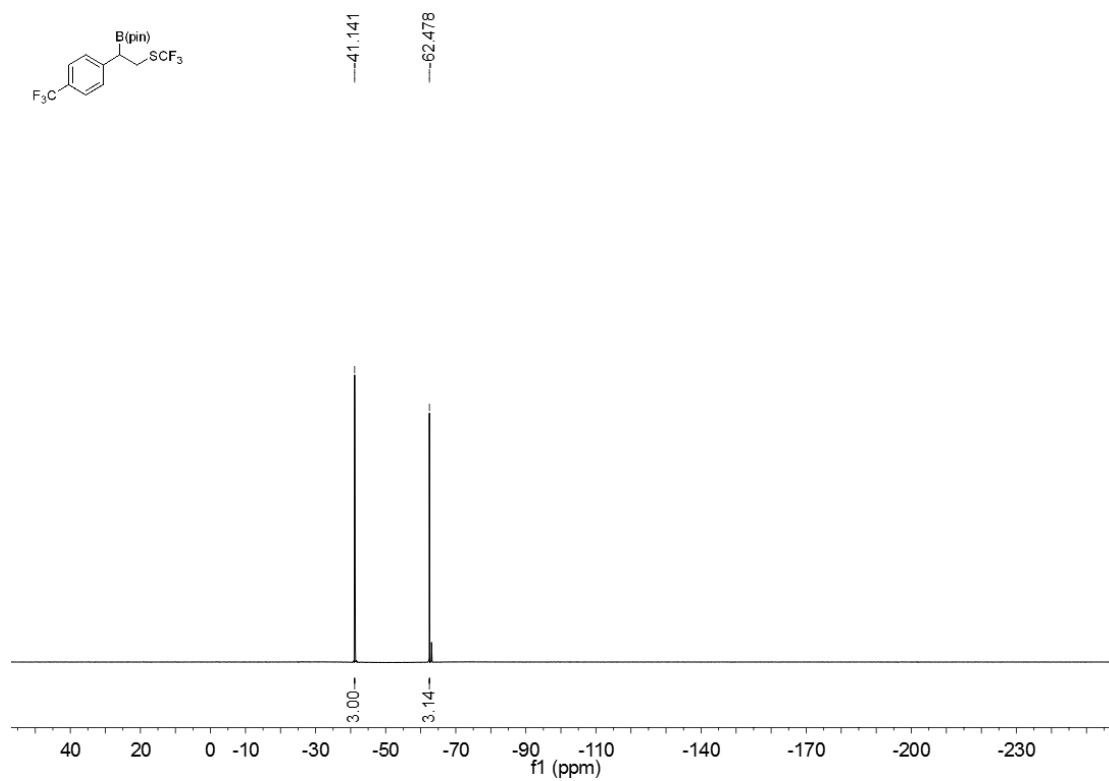

**$^{11}\text{B}$  NMR (128 MHz,  $\text{CD}_3\text{Cl}_3$ ) spectrum of 4,4,5,5-tetramethyl-2-(1-(4-(trifluoromethyl)phenyl)-2-(trifluoromethylthio)ethyl)-1,3,2-dioxaborolane 8c**

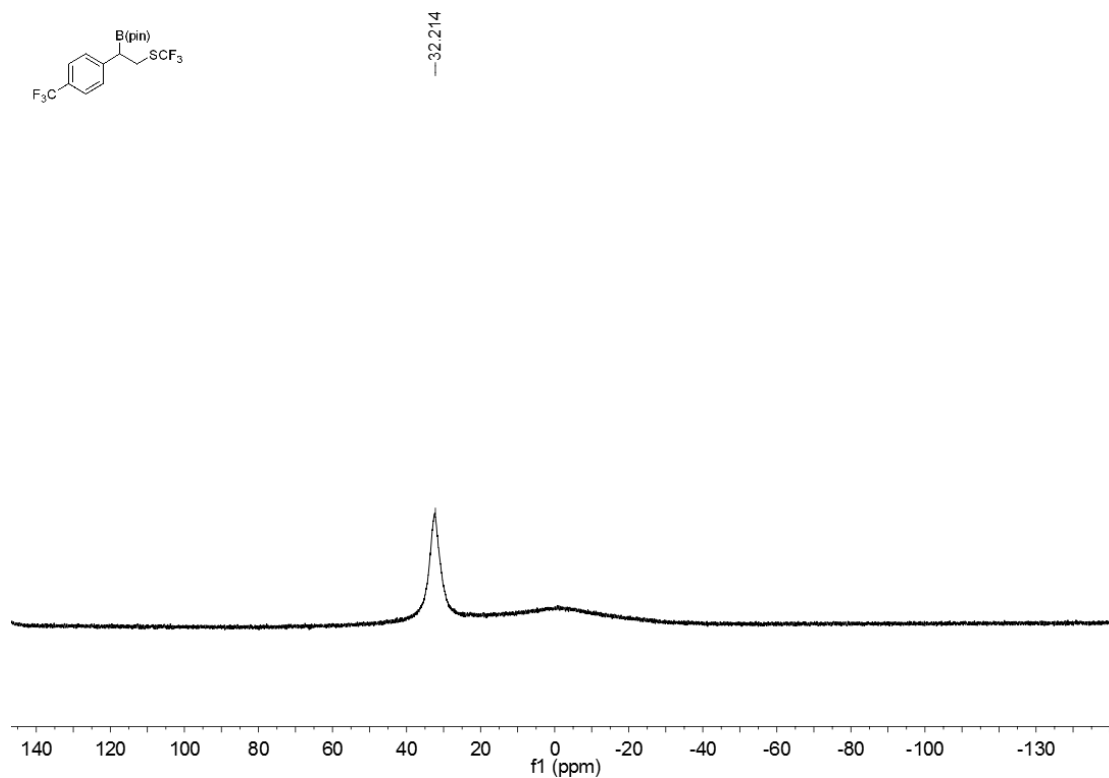

**<sup>1</sup>H NMR (400 MHz, CDCl<sub>3</sub>) spectrum of 4,4,5,5-tetramethyl-2-(1-(3-((2-methyl-1,3-dioxolan-2-yl)methyl)phenyl)-2-(trifluoromethylthio)ethyl)-1,3,2-dioxaborolane 8d**

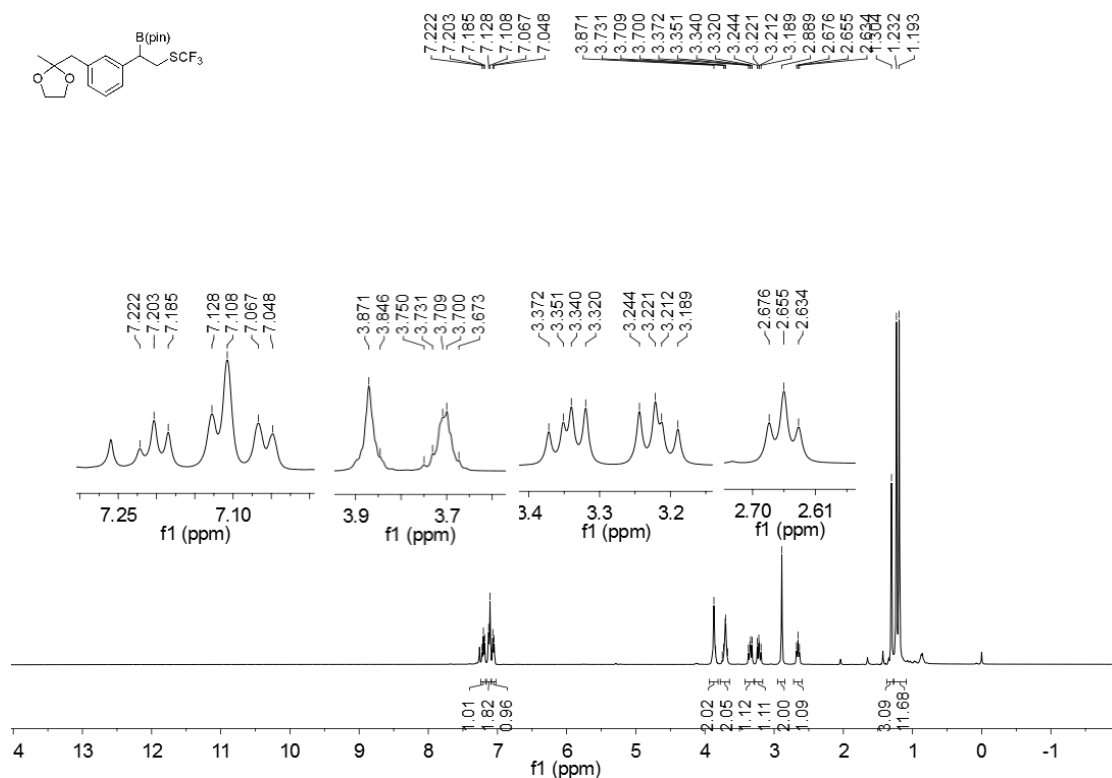

**<sup>13</sup>C NMR (101 MHz, CDCl<sub>3</sub>) spectrum of 4,4,5,5-tetramethyl-2-(1-(3-((2-methyl-1,3-dioxolan-2-yl)methyl)phenyl)-2-(trifluoromethylthio)ethyl)-1,3,2-dioxaborolane 8d**

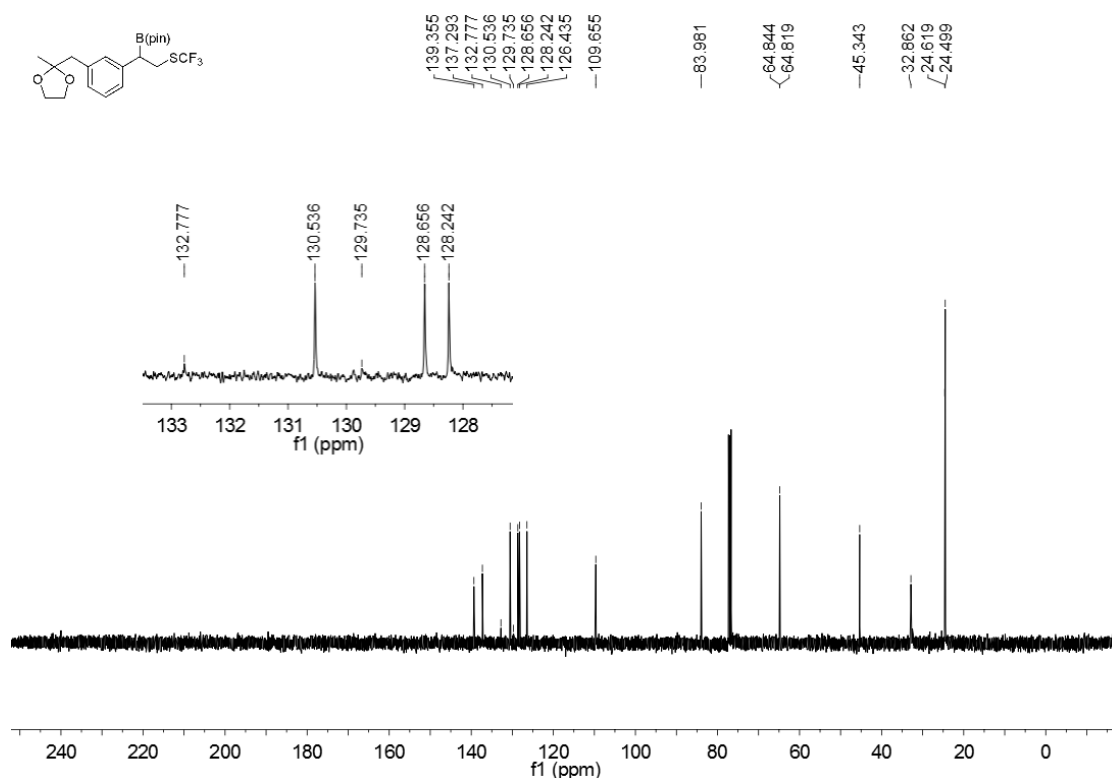

**$^{19}\text{F}$  NMR (376 MHz,  $\text{CDCl}_3$ ) spectrum of  
4,4,5,5-tetramethyl-2-(1-(3-((2-methyl-1,3-dioxolan-2-yl)methyl)phenyl)-2-(trifluoromethylthio)ethyl)-1,3,2-dioxaborolane 8d**

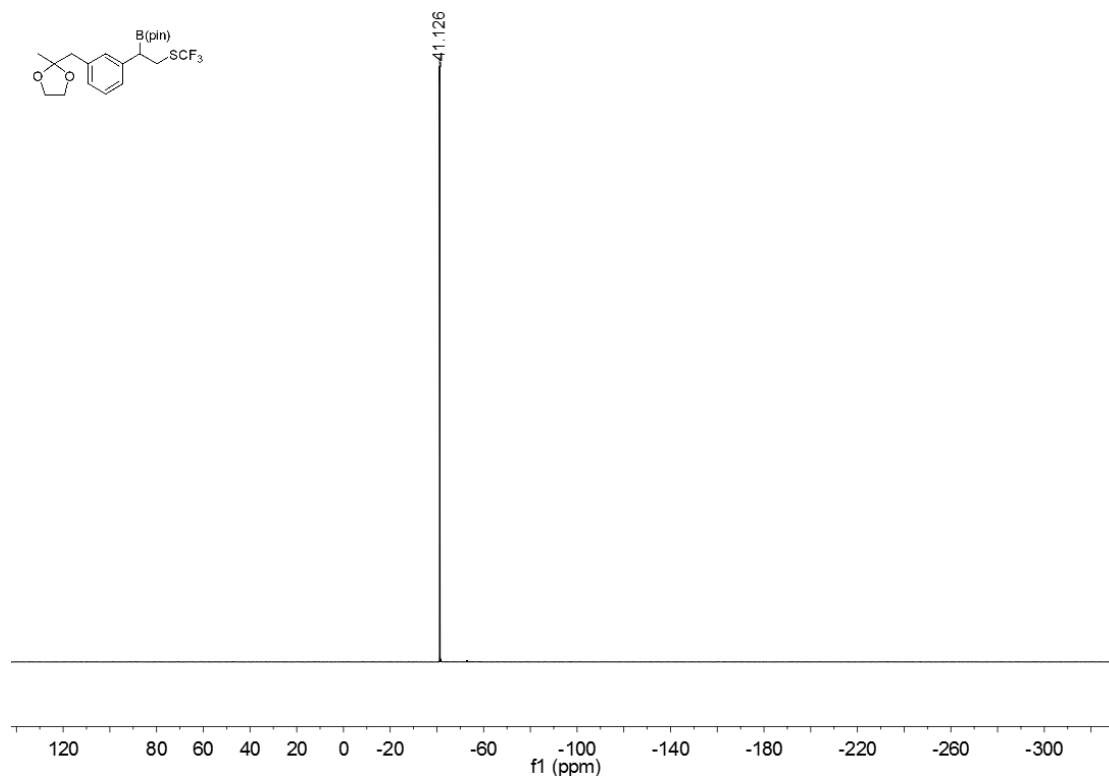

**$^{11}\text{B}$  NMR (128 MHz,  $\text{CD}_3\text{Cl}_3$ ) spectrum of  
4,4,5,5-tetramethyl-2-(1-(3-((2-methyl-1,3-dioxolan-2-yl)methyl)phenyl)-2-(trifluoromethylthio)ethyl)-1,3,2-dioxaborolane 8d**

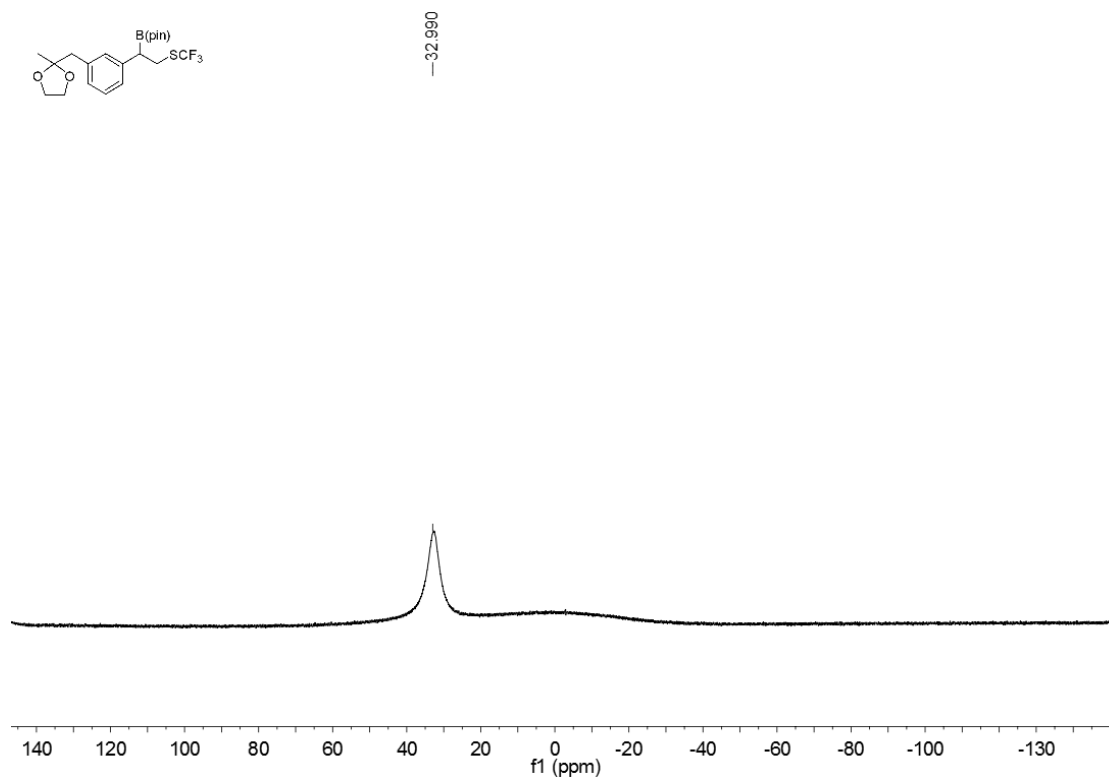

**<sup>1</sup>H NMR (400 MHz, CDCl<sub>3</sub>) spectrum of  
2-(1-(benzo[d][1,3]dioxol-5-yl)-2-(trifluoromethylthio)ethyl)-4,4,5,5-tetramethyl-  
1,3,2-dioxaborolane 8e**

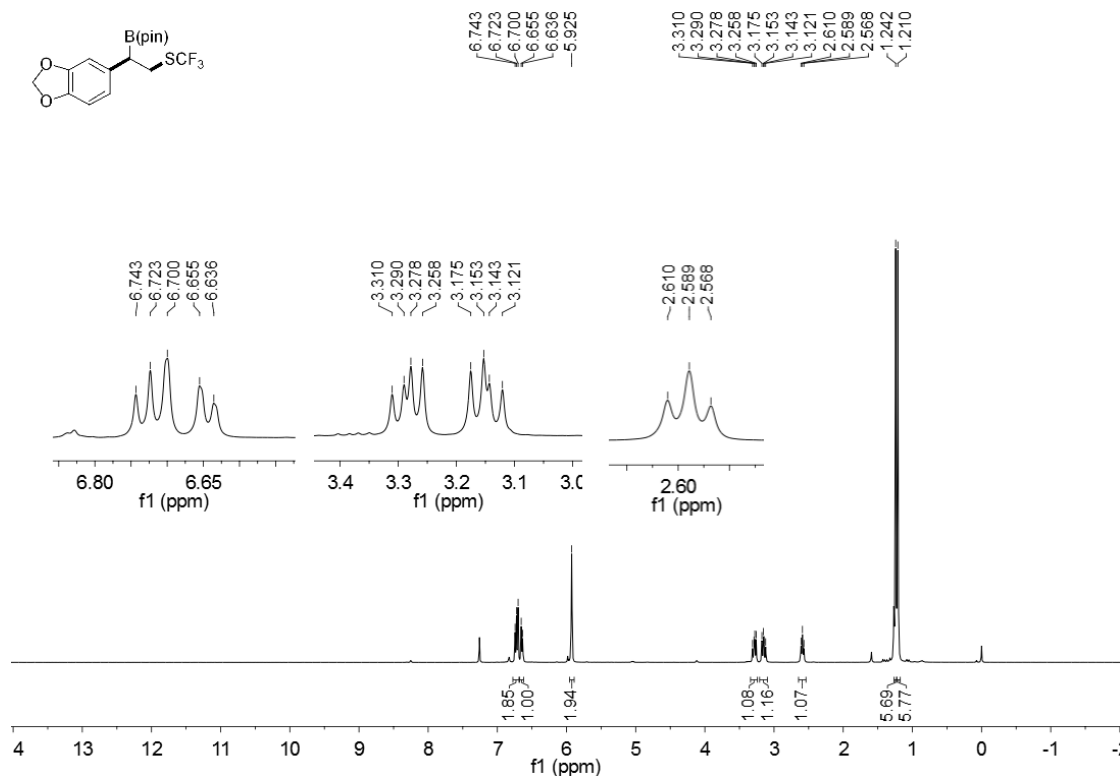

**<sup>13</sup>C NMR (101 MHz, CDCl<sub>3</sub>) spectrum of  
2-(1-(benzo[d][1,3]dioxol-5-yl)-2-(trifluoromethylthio)ethyl)-4,4,5,5-tetramethyl-  
1,3,2-dioxaborolane 8e**

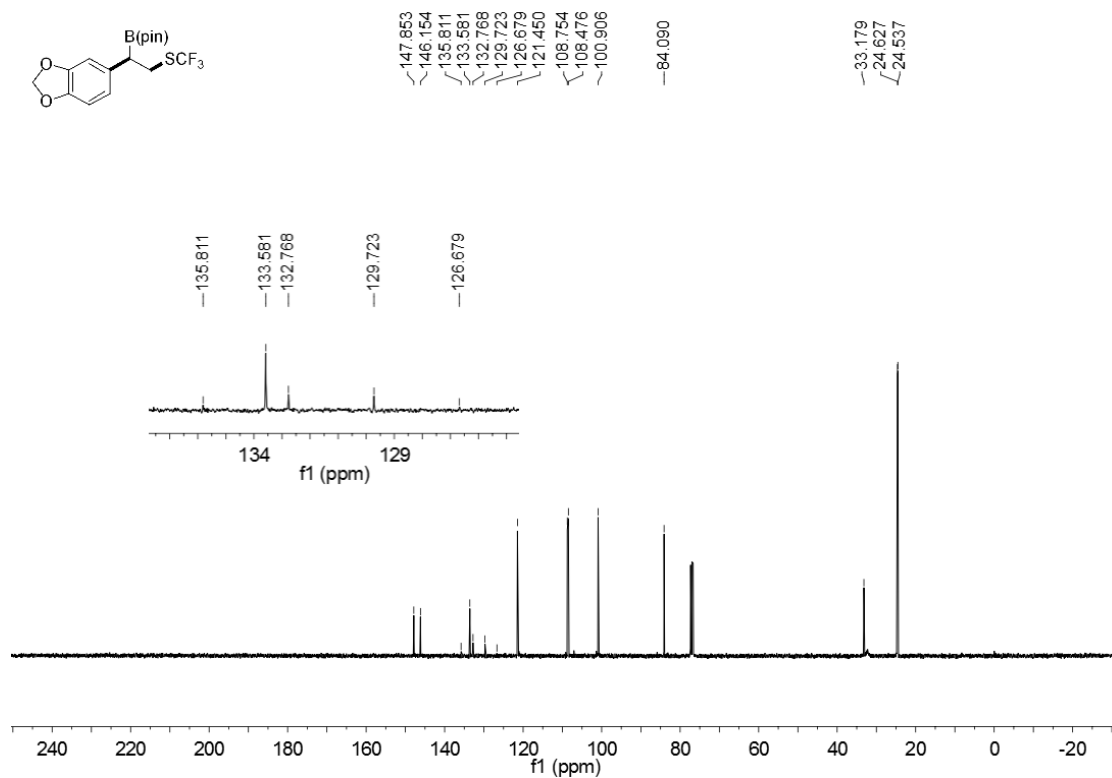

**$^{19}\text{F}$  NMR (376 MHz,  $\text{CDCl}_3$ ) spectrum of  
2-(1-(benzo[d][1,3]dioxol-5-yl)-2-(trifluoromethylthio)ethyl)-4,4,5,5-tetramethyl-  
1,3,2-dioxaborolane 8e**

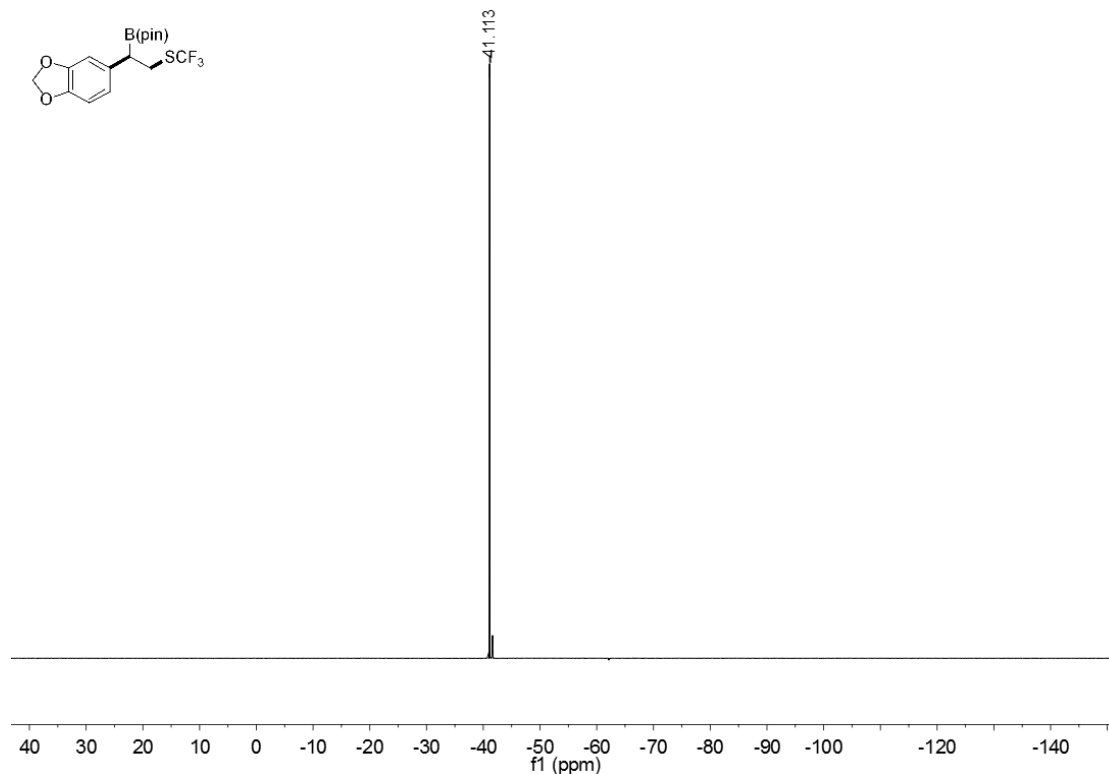

**$^{11}\text{B}$  NMR (128 MHz,  $\text{CD}_3\text{Cl}_3$ ) spectrum of  
2-(1-(benzo[d][1,3]dioxol-5-yl)-2-(trifluoromethylthio)ethyl)-4,4,5,5-tetramethyl-  
1,3,2-dioxaborolane 8e**

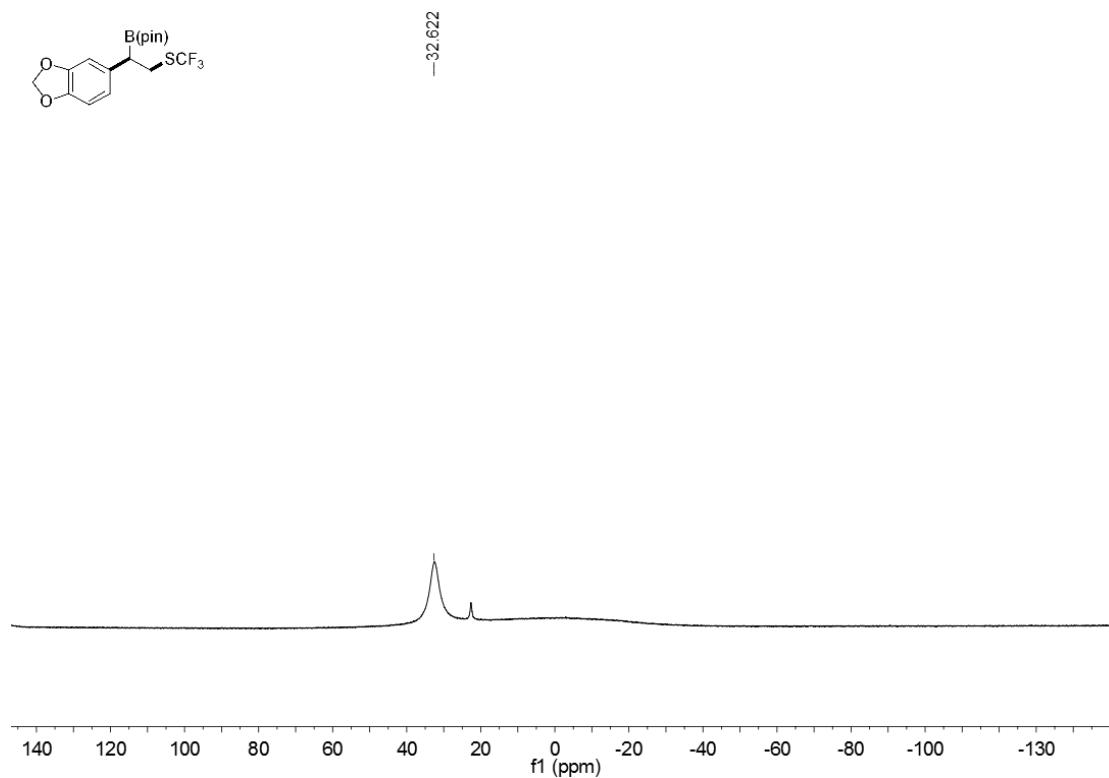

**<sup>1</sup>H NMR (400 MHz, CDCl<sub>3</sub>) spectrum of  
4,4,5,5-tetramethyl-2-(1-(naphthalen-2-yl)-2-(trifluoromethylthio)ethyl)-1,3,2-dioxaborolane 8f**

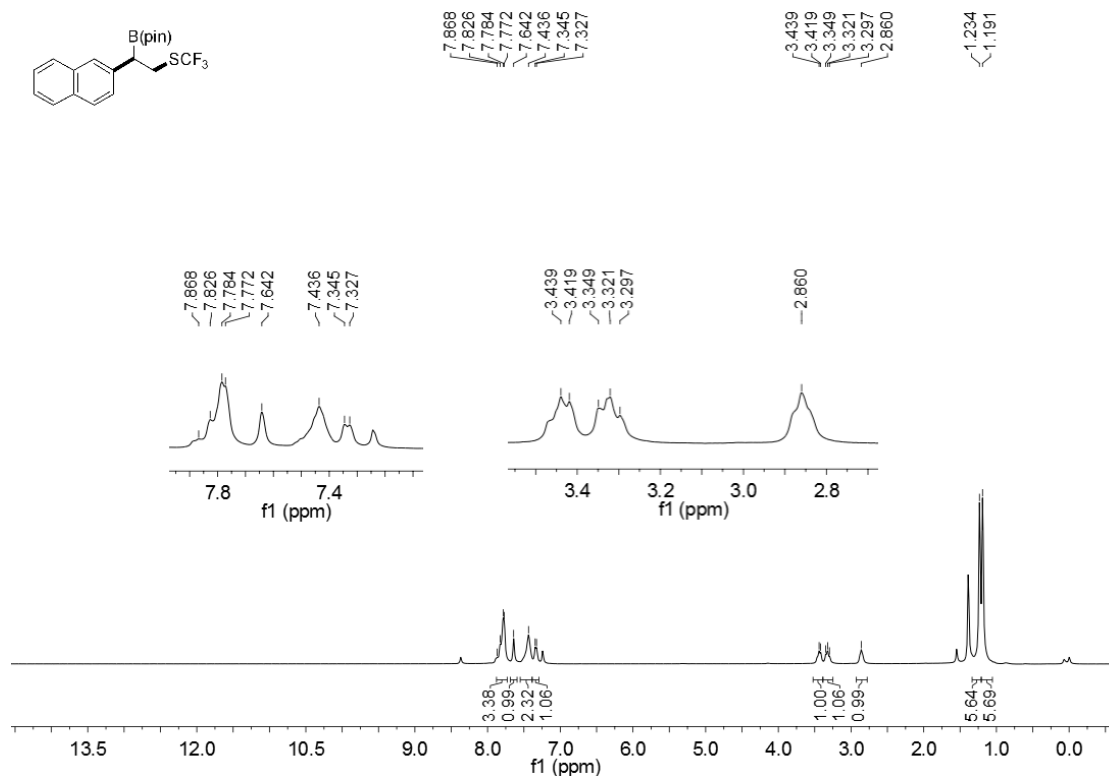

**<sup>13</sup>C NMR (101 MHz, CDCl<sub>3</sub>) spectrum of  
4,4,5,5-tetramethyl-2-(1-(naphthalen-2-yl)-2-(trifluoromethylthio)ethyl)-1,3,2-dioxaborolane 8f**

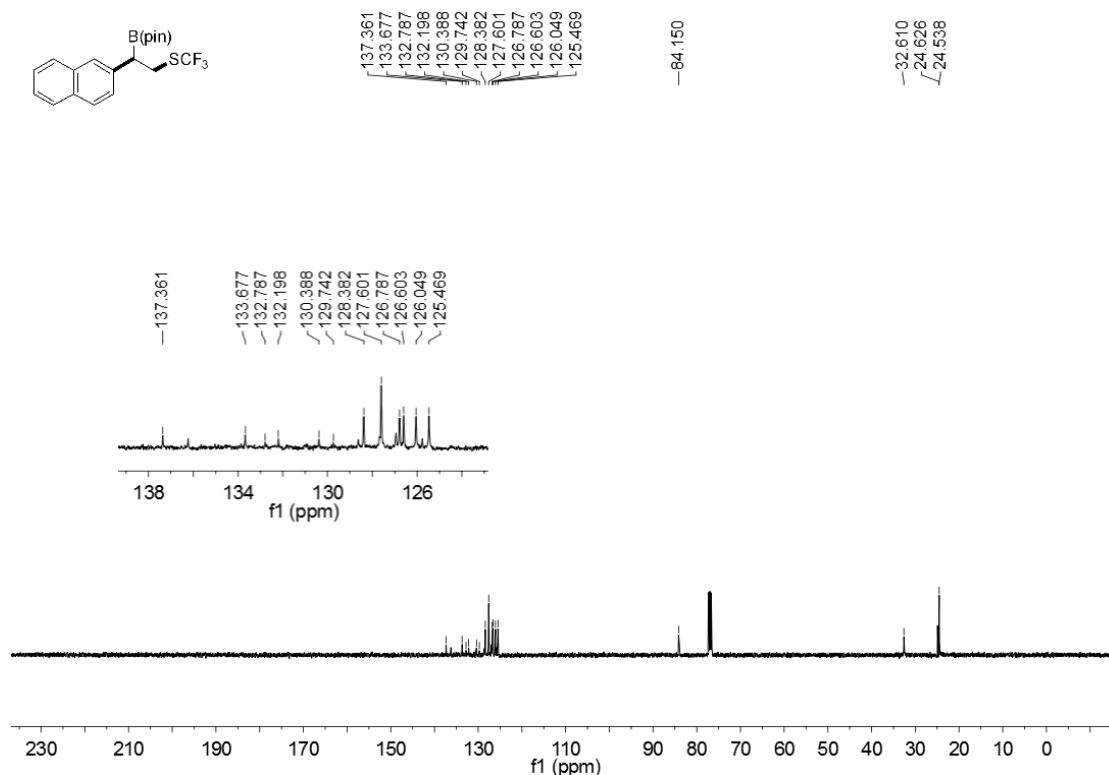



**$^{19}\text{F}$  NMR (376 MHz,  $\text{CDCl}_3$ ) spectrum of 4,4,5,5-tetramethyl-2-(1-(naphthalen-2-yl)-2-(trifluoromethylthio)ethyl)-1,3,2-dioxaborolane 8f**

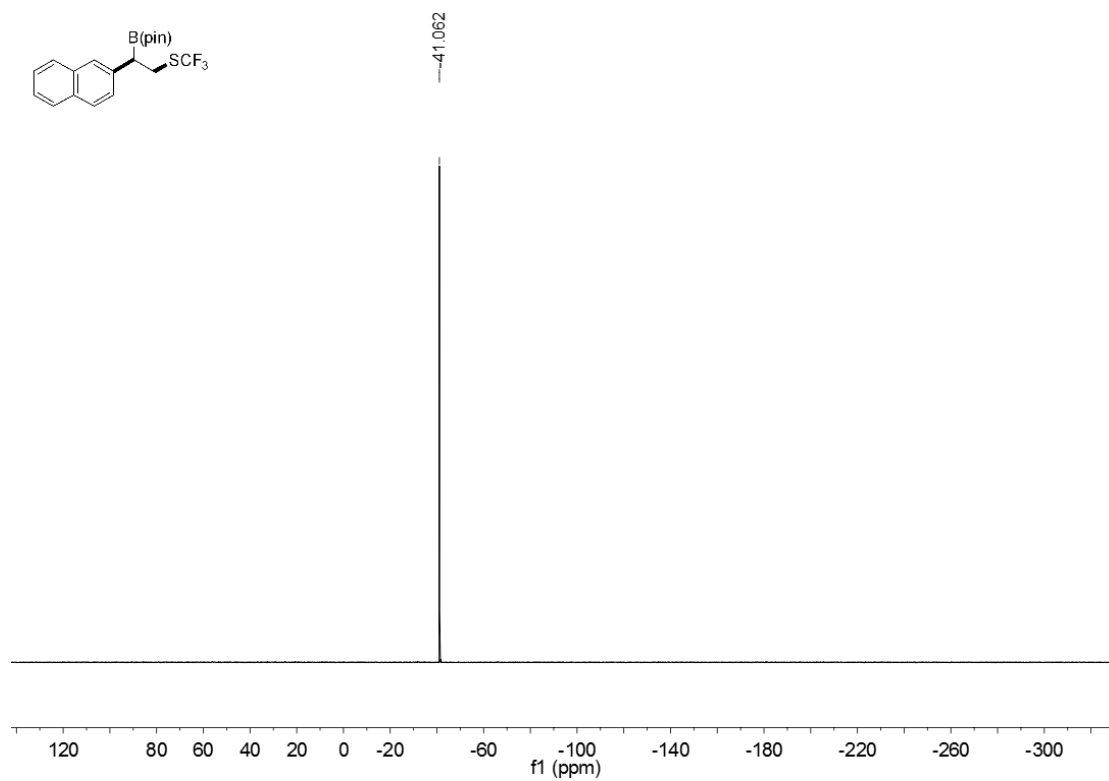

**$^{11}\text{B}$  NMR (128 MHz,  $\text{CD}_3\text{Cl}_3$ ) spectrum of 4,4,5,5-tetramethyl-2-(1-(naphthalen-2-yl)-2-(trifluoromethylthio)ethyl)-1,3,2-dioxaborolane 8f**

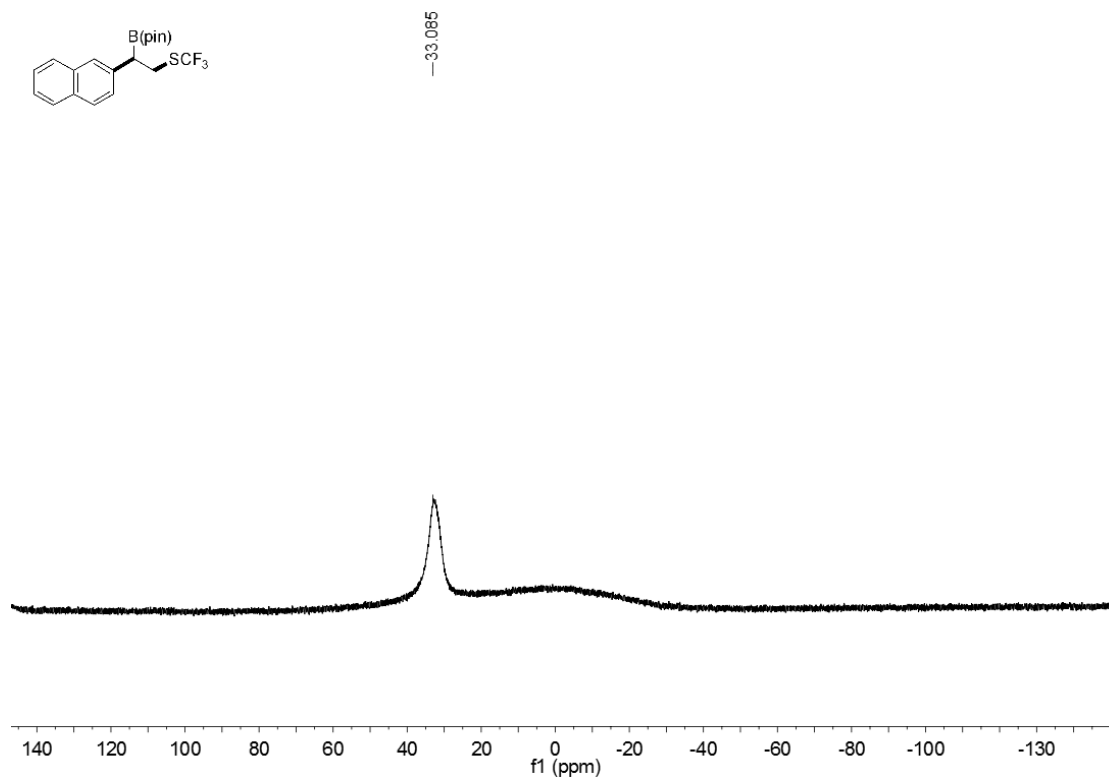

**<sup>1</sup>H NMR (400 MHz, CDCl<sub>3</sub>) spectrum of 2-(1-(benzofuran-5-yl)-2-(trifluoromethylthio)ethyl)-4,4,5,5-tetramethyl-1,3,2-dioxaborolane 8g**

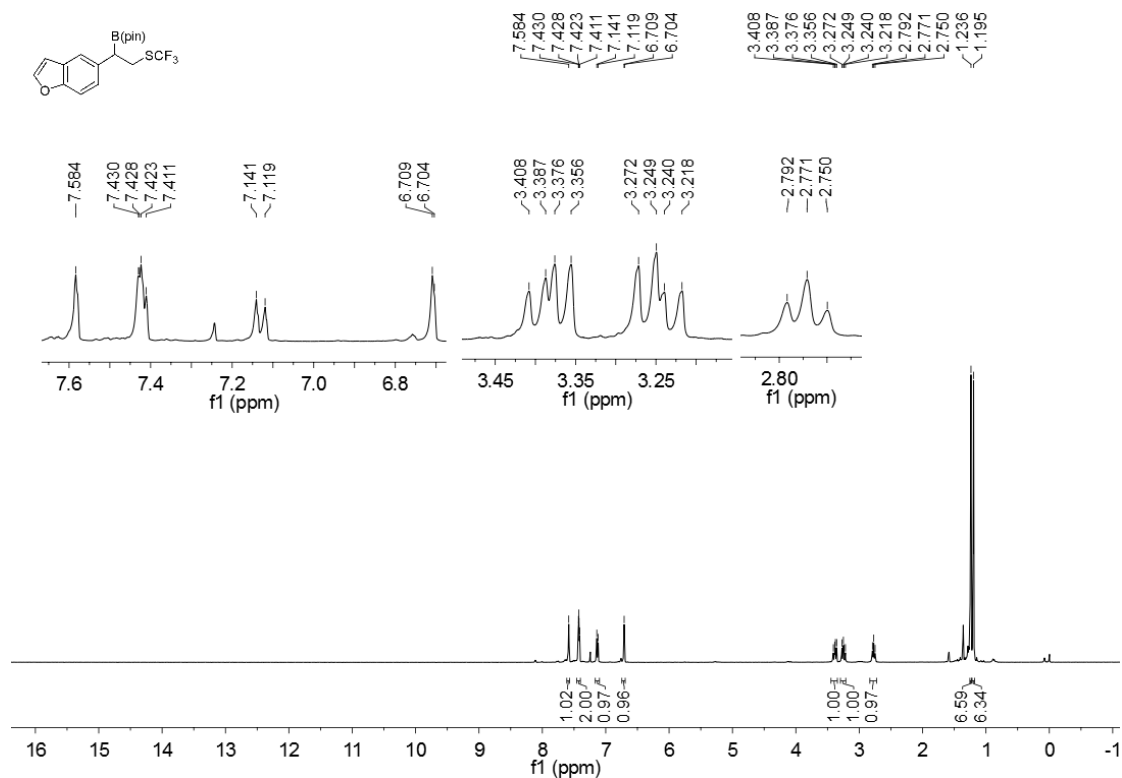

**<sup>13</sup>C NMR (101 MHz, CDCl<sub>3</sub>) spectrum of 2-(1-(benzofuran-5-yl)-2-(trifluoromethylthio)ethyl)-4,4,5,5-tetramethyl-1,3,2-dioxaborolane 8g**

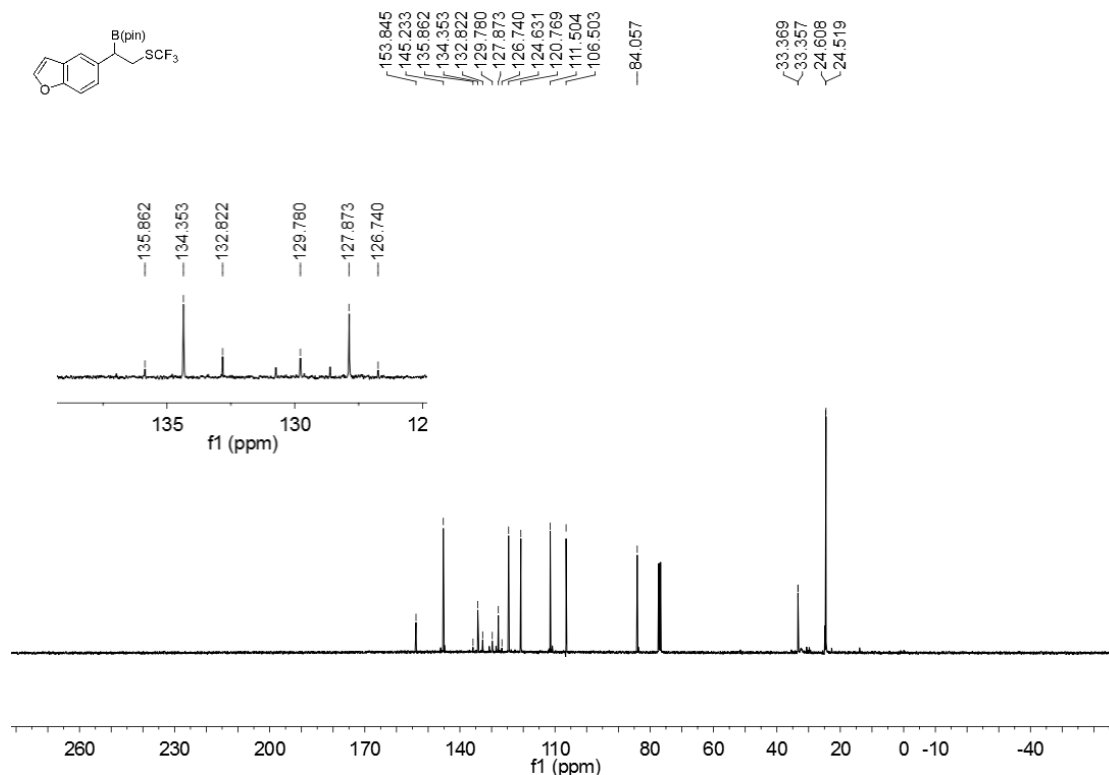

**<sup>19</sup>F NMR (376 MHz, CDCl<sub>3</sub>) spectrum of 2-(1-(benzofuran-5-yl)-2-(trifluoromethylthio)ethyl)-4,4,5,5-tetramethyl-1,3,2-dioxaborolane 8g**

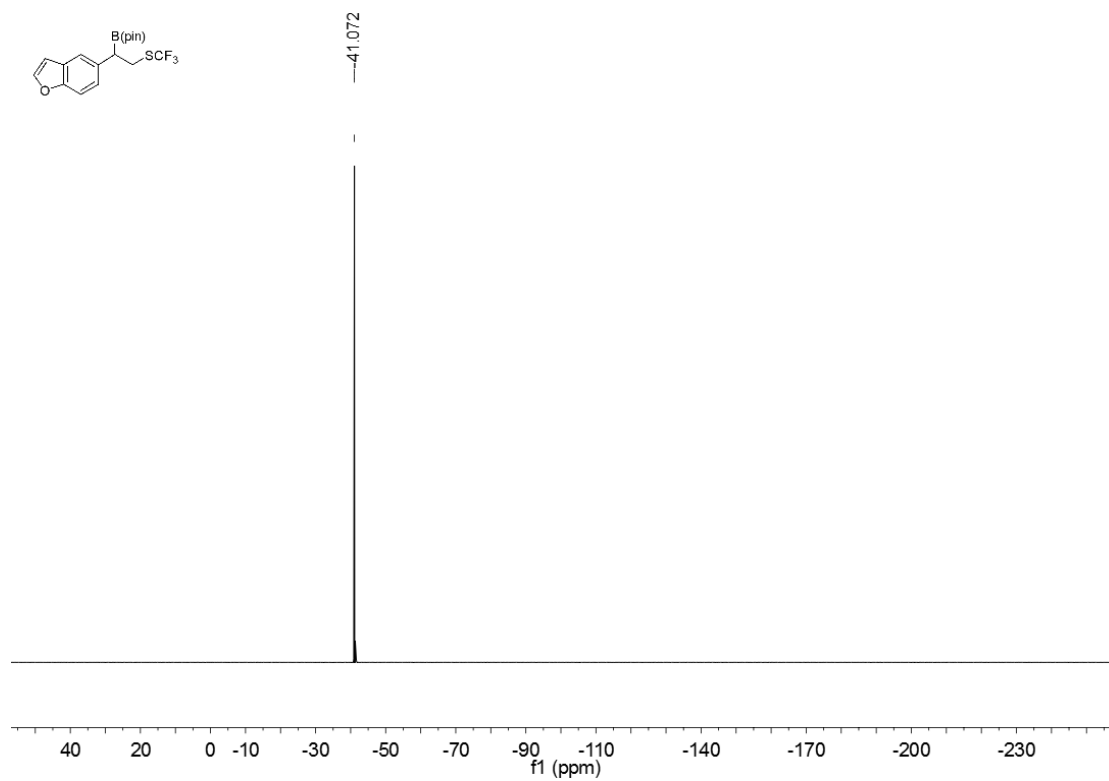

**<sup>11</sup>B NMR (128 MHz, CD<sub>3</sub>Cl<sub>3</sub>) spectrum of 2-(1-(benzofuran-5-yl)-2-(trifluoromethylthio)ethyl)-4,4,5,5-tetramethyl-1,3,2-dioxaborolane 8g**

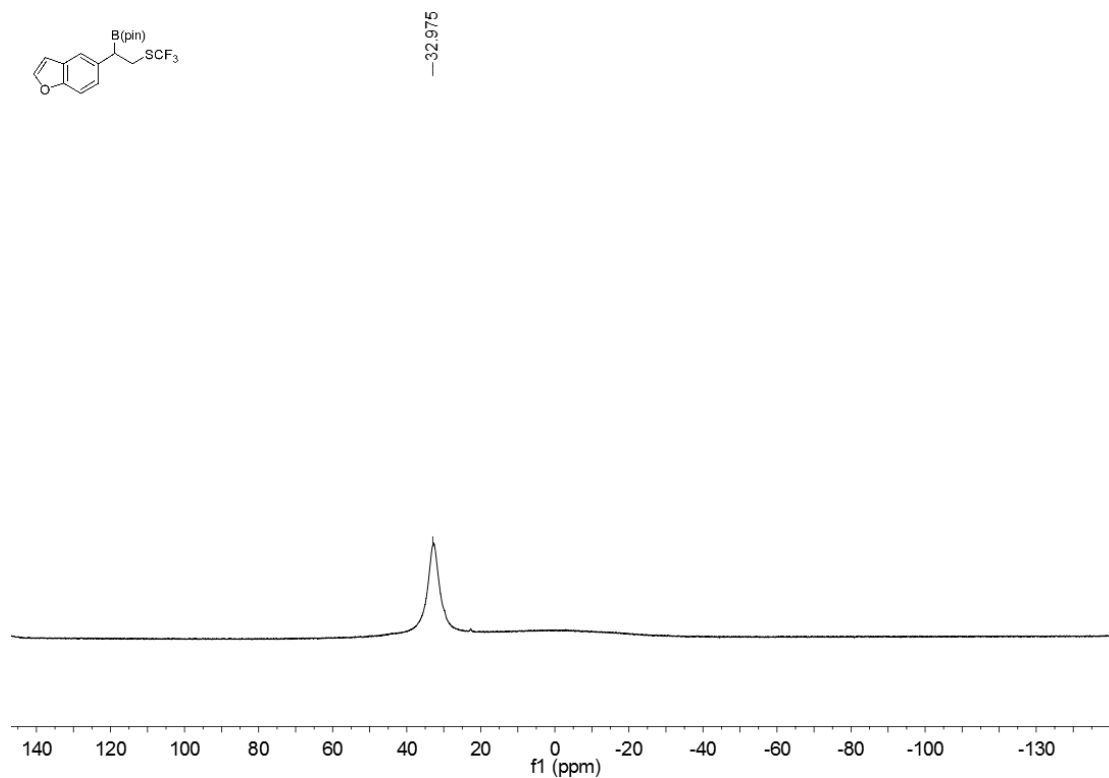

**<sup>1</sup>H NMR (400 MHz, CDCl<sub>3</sub>) spectrum of 2-(1-(benzo[b]thiophen-5-yl)-2-(trifluoromethylthio)ethyl)-4,4,5,5-tetramethyl-1,3,2-dioxaborolane 8h**

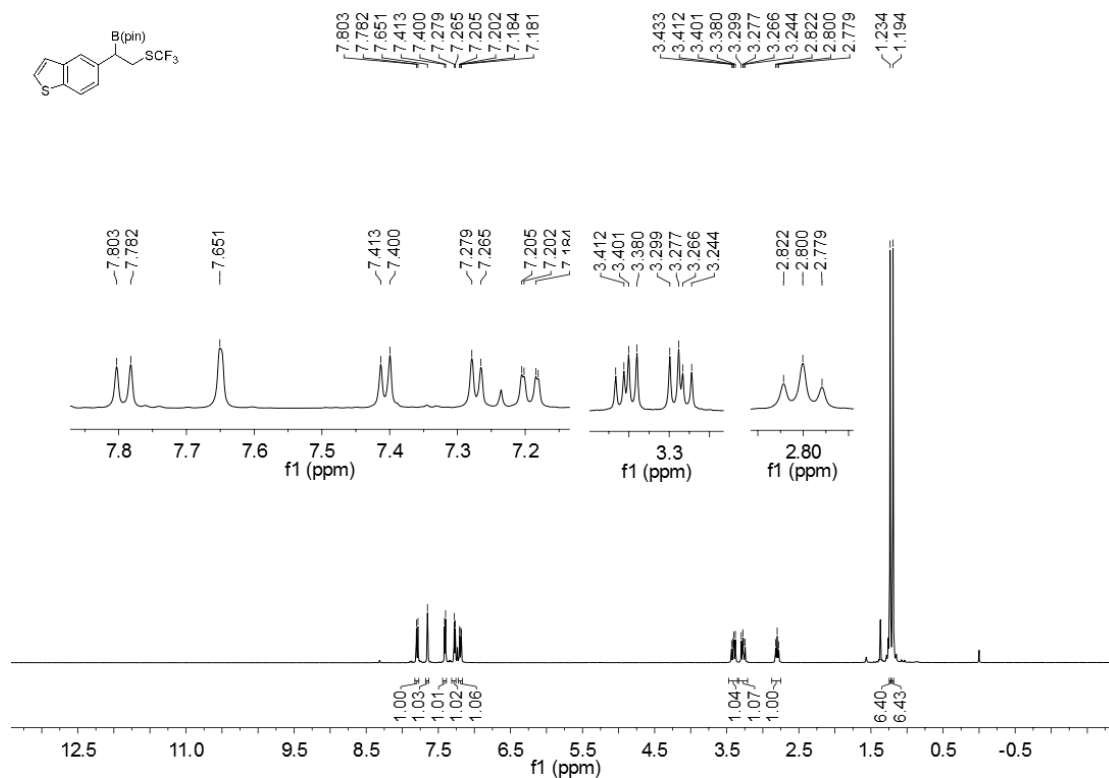

**<sup>13</sup>C NMR (101 MHz, CDCl<sub>3</sub>) spectrum of 2-(1-(benzo[b]thiophen-5-yl)-2-(trifluoromethylthio)ethyl)-4,4,5,5-tetramethyl-1,3,2-dioxaborolane 8h**

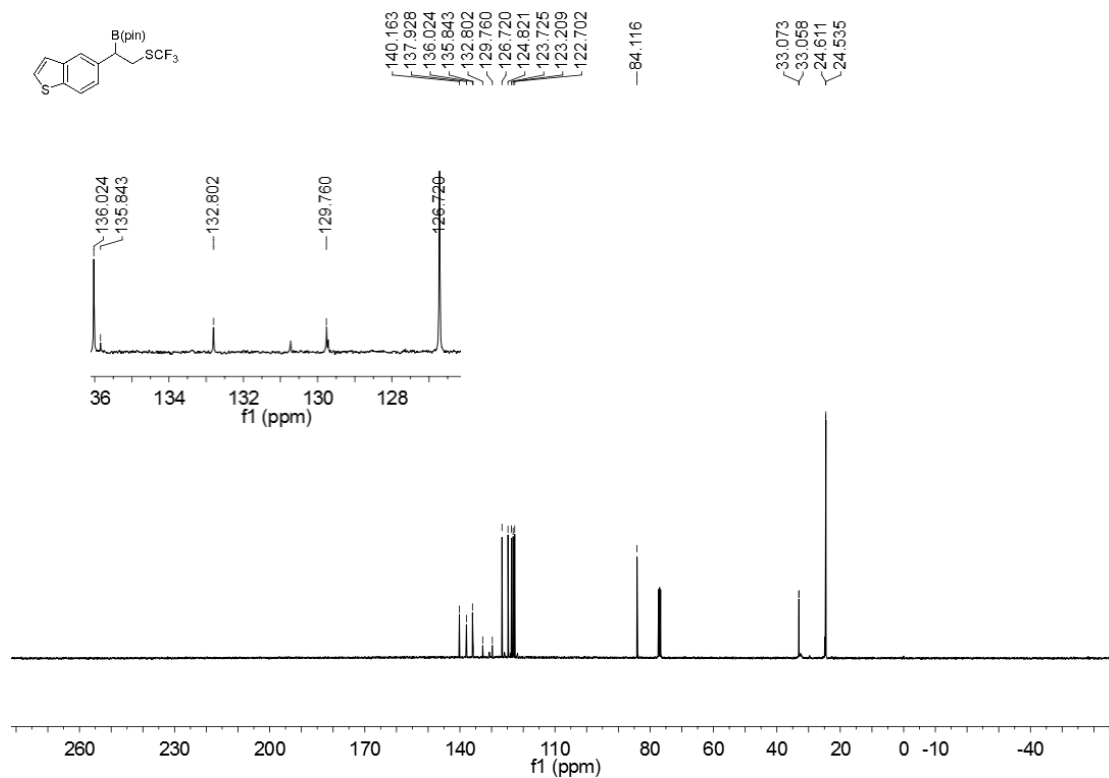

**$^{19}\text{F}$  NMR (376 MHz,  $\text{CDCl}_3$ ) spectrum of 2-(1-(benzo[b]thiophen-5-yl)-2-(trifluoromethylthio)ethyl)-4,4,5,5-tetramethyl-1,3,2-dioxaborolane 8h**

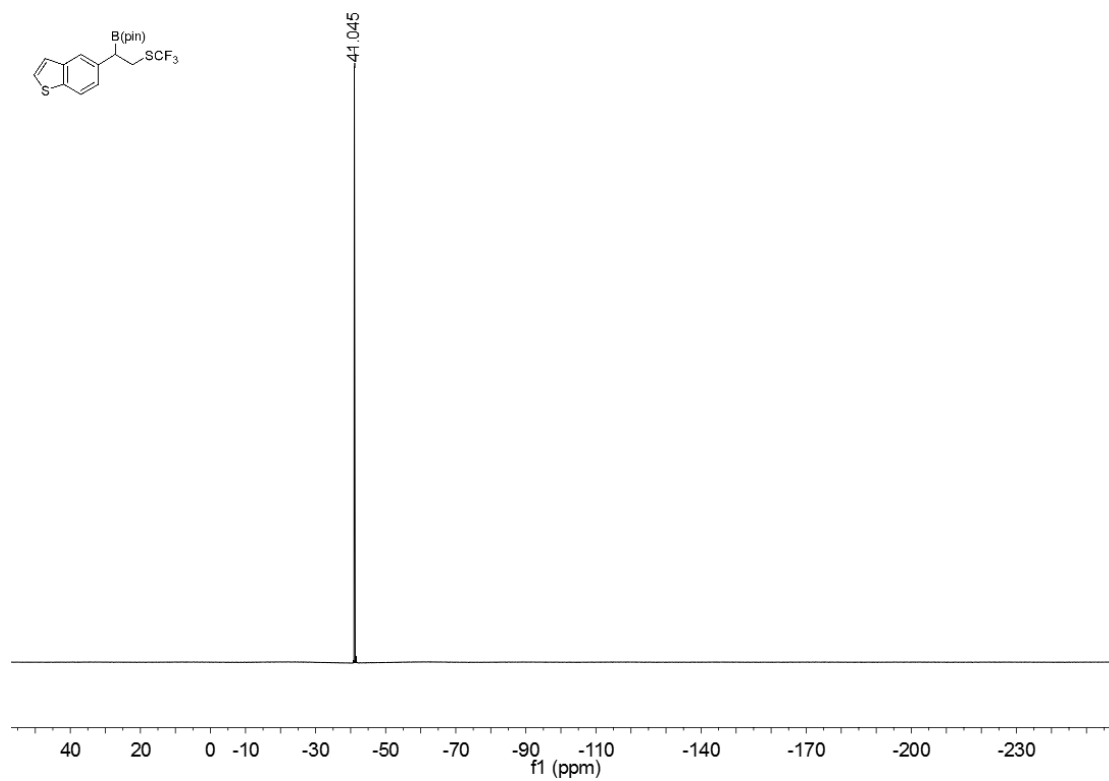

**$^{11}\text{B}$  NMR (128 MHz,  $\text{CD}_3\text{Cl}_3$ ) spectrum of 2-(1-(benzo[b]thiophen-5-yl)-2-(trifluoromethylthio)ethyl)-4,4,5,5-tetramethyl-1,3,2-dioxaborolane 8h**

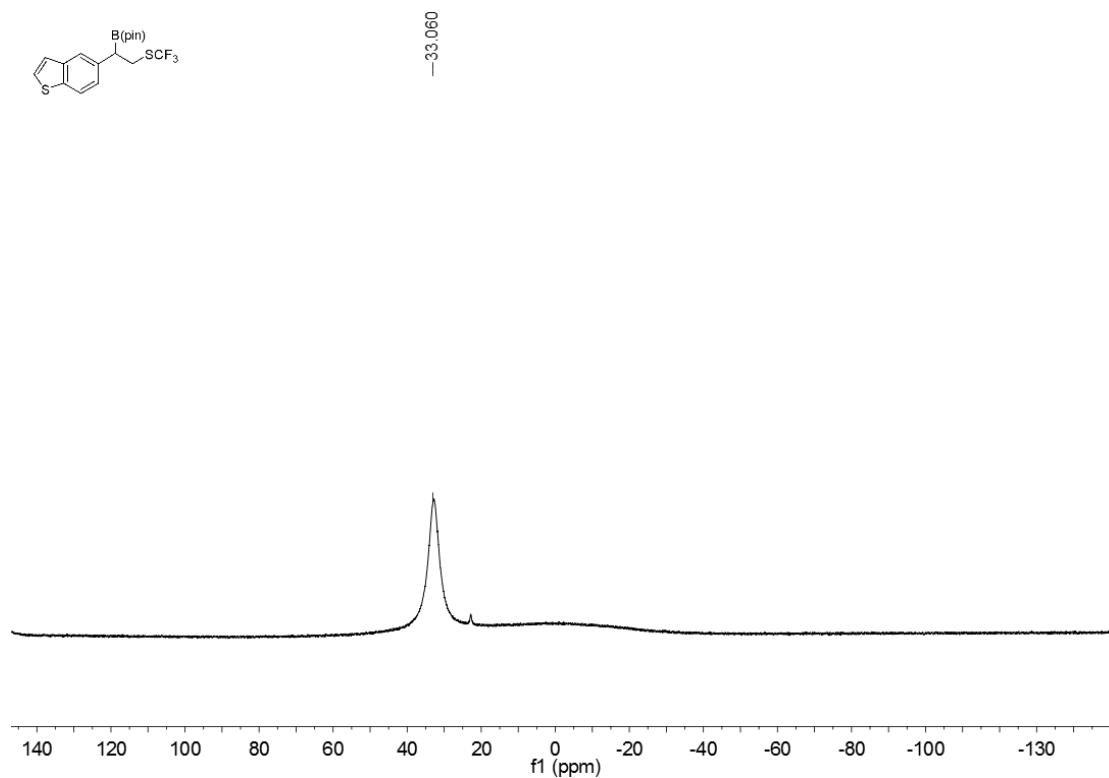



**$^{19}\text{F}$  NMR (376 MHz,  $\text{CDCl}_3$ ) spectrum of  
 $(\pm)$ -2-((1*R*,2*R*)-1-(benzo[*b*]thiophen-5-yl)-5-phenyl-2-(trifluoromethylthio)pentyl)-4,4,5,5-tetramethyl-1,3,2-dioxaborolane **8i****

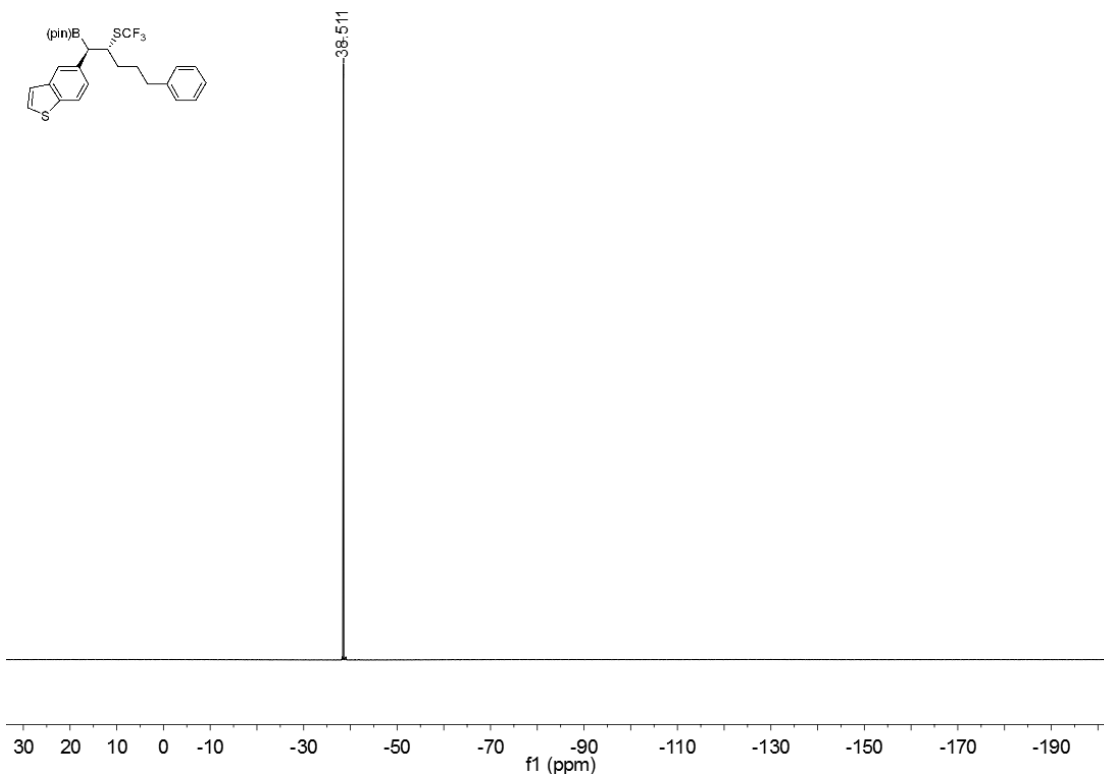

**$^{11}\text{B}$  NMR (128 MHz,  $\text{CD}_3\text{Cl}_3$ ) spectrum of  
 $(\pm)$ -2-((1*R*,2*R*)-1-(benzo[*b*]thiophen-5-yl)-5-phenyl-2-(trifluoromethylthio)pentyl)-4,4,5,5-tetramethyl-1,3,2-dioxaborolane **8i****

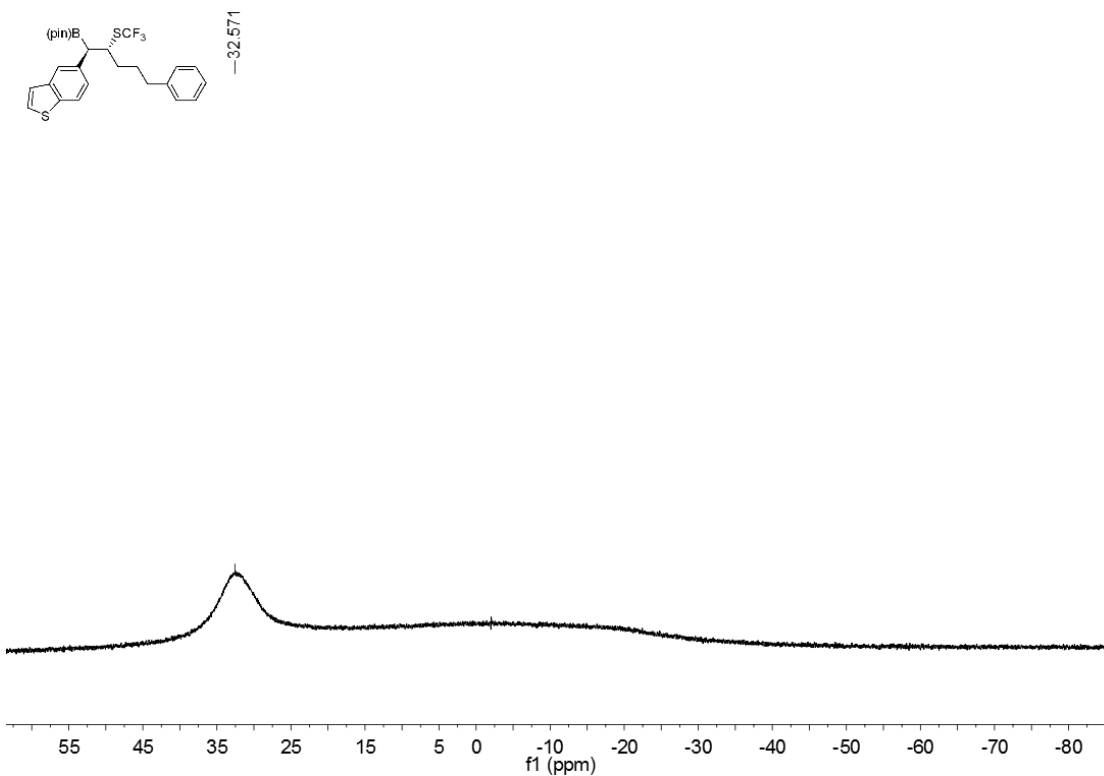

**<sup>1</sup>H NMR (400 MHz, CDCl<sub>3</sub>) spectrum of  
5-(4-(3-bromophenylthio)phenyl)-1-methyl-1H-pyrazole 11**

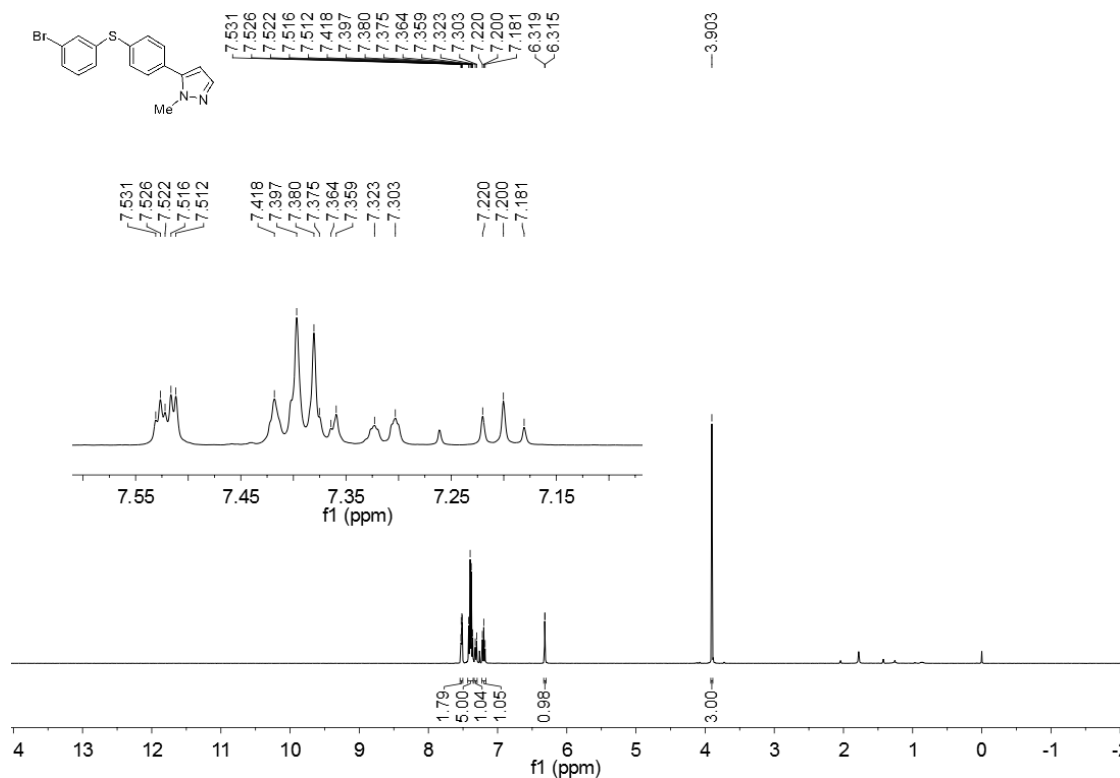

**<sup>13</sup>C NMR (101 MHz, CDCl<sub>3</sub>) spectrum of  
5-(4-(3-bromophenylthio)phenyl)-1-methyl-1H-pyrazole 11**

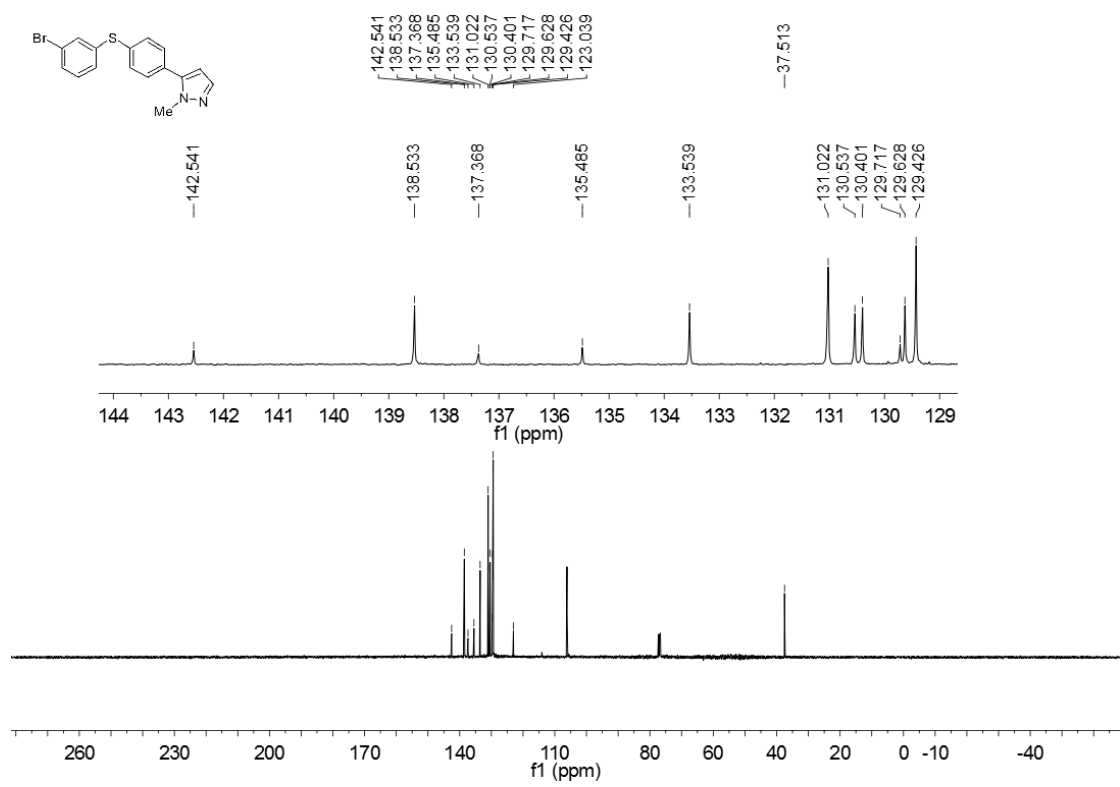



**<sup>1</sup>H NMR (300 MHz, CDCl<sub>3</sub>) spectrum of  
(±)-5-(4-(3-((3*R*,4*R*)-3-(difluoromethylthio)-4-(4,4,5,5-tetramethyl-1,3,2-dioxaborolan-2-yl)phenylthio)phenyl)-1-methyl-1*H*-pyrazole 12**

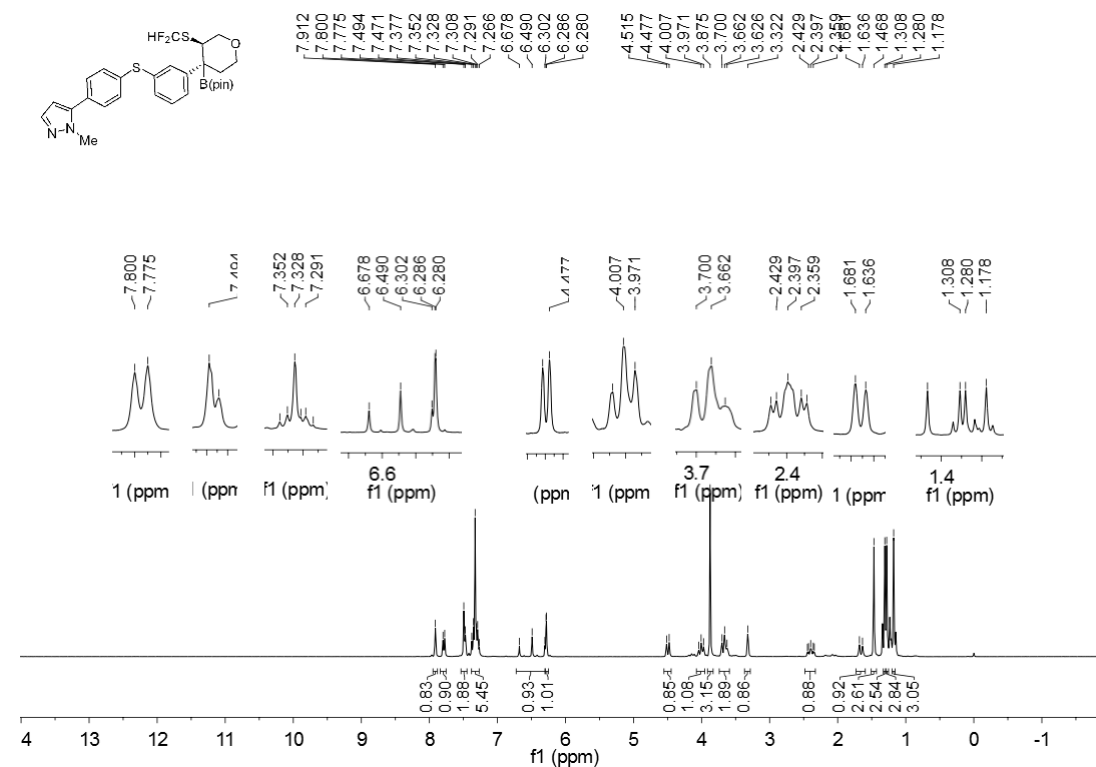

**<sup>13</sup>C NMR (101 MHz, CDCl<sub>3</sub>) spectrum of  
(±)-5-(4-(3-((3*R*,4*R*)-3-(difluoromethylthio)-4-(4,4,5,5-tetramethyl-1,3,2-dioxaborolan-2-yl)phenylthio)phenyl)-1-methyl-1*H*-pyrazole 12**

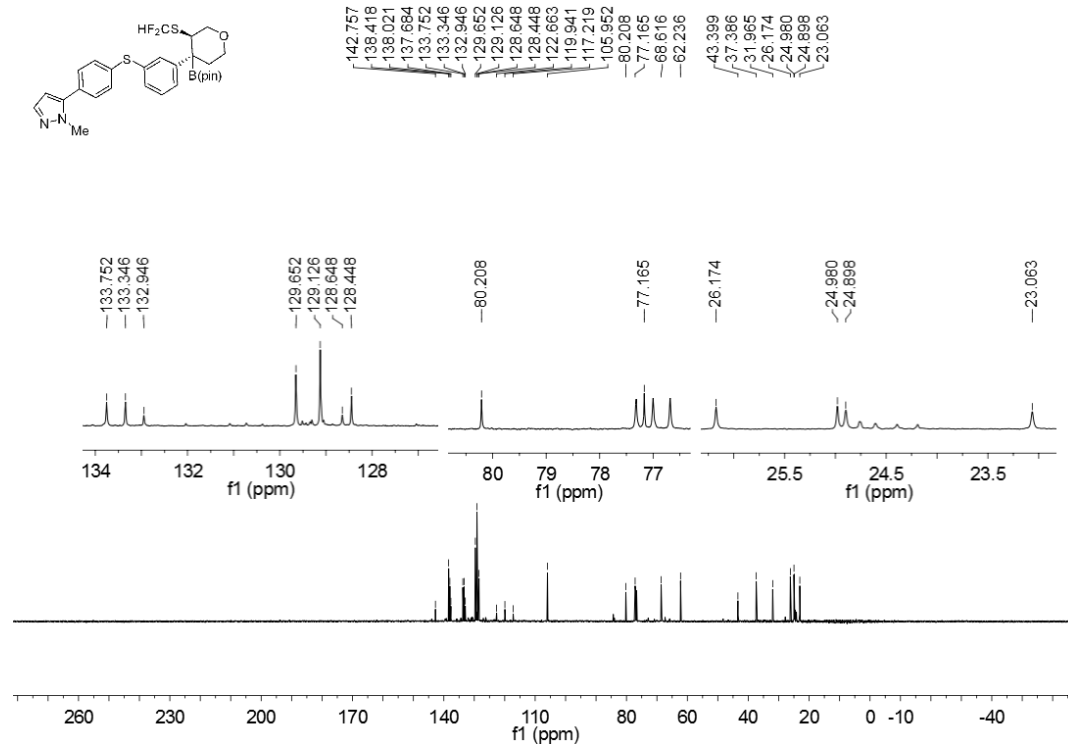

**$^{19}\text{F}$  NMR (376 MHz,  $\text{CDCl}_3$ ) spectrum of  
(±)-5-(4-(3-((3*R*,4*R*)-3-(difluoromethylthio)-4-(4,4,5,5-tetramethyl-1,3,2-dioxaborolan-2-yl)tetrahydro-2*H*-pyran-4-yl)phenylthio)phenyl)-1-methyl-1*H*-pyrazole 12**

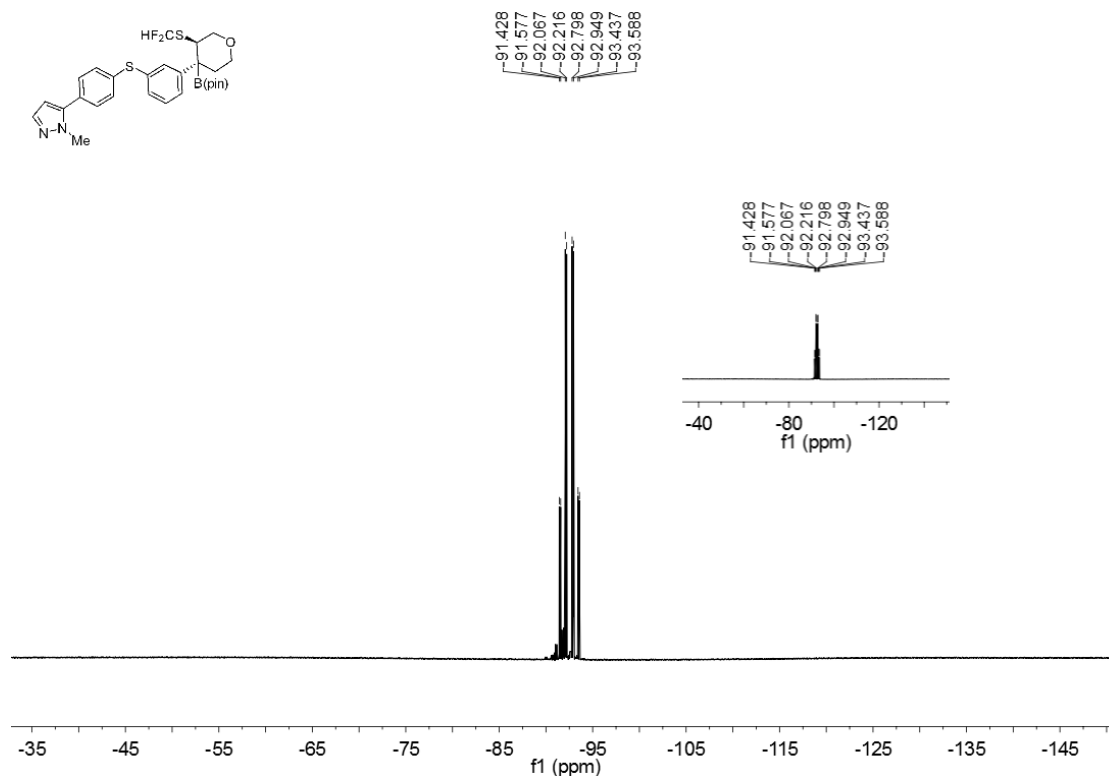

**$^{11}\text{B}$  NMR (128 MHz,  $\text{CD}_3\text{Cl}_3$ ) spectrum of  
(±)-5-(4-(3-((3*R*,4*R*)-3-(difluoromethylthio)-4-(4,4,5,5-tetramethyl-1,3,2-dioxaborolan-2-yl)tetrahydro-2*H*-pyran-4-yl)phenylthio)phenyl)-1-methyl-1*H*-pyrazole 12**

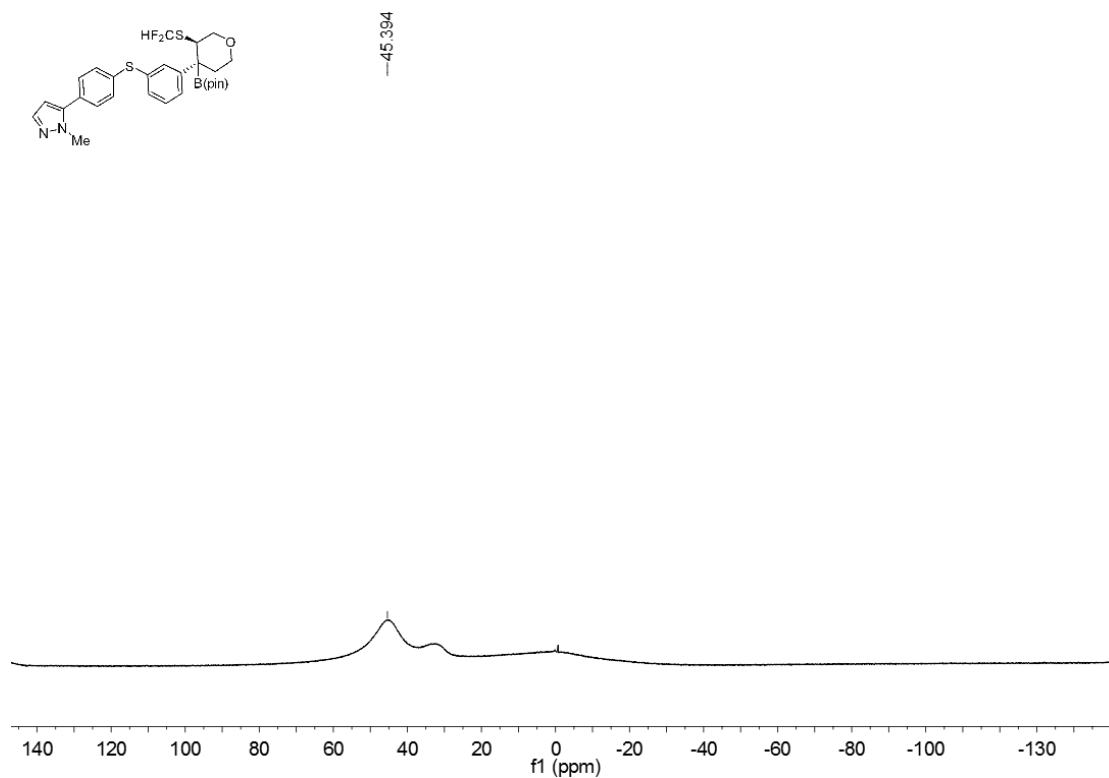

**<sup>1</sup>H NMR (400 MHz, CDCl<sub>3</sub>) spectrum of  
3-(difluoromethylthio)dihydro-2H-pyran-4(3H)-one 13**

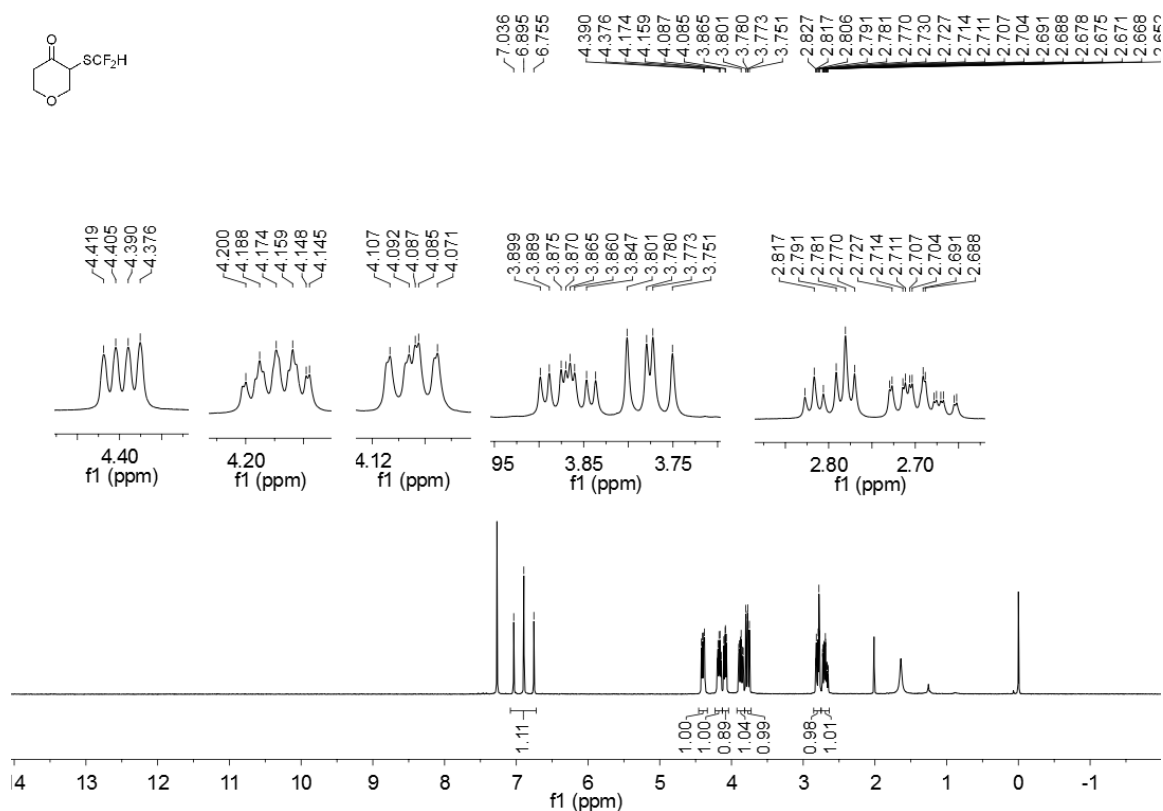

**<sup>13</sup>C NMR (126 MHz, CDCl<sub>3</sub>) spectrum of  
3-(difluoromethylthio)dihydro-2H-pyran-4(3H)-one 13**

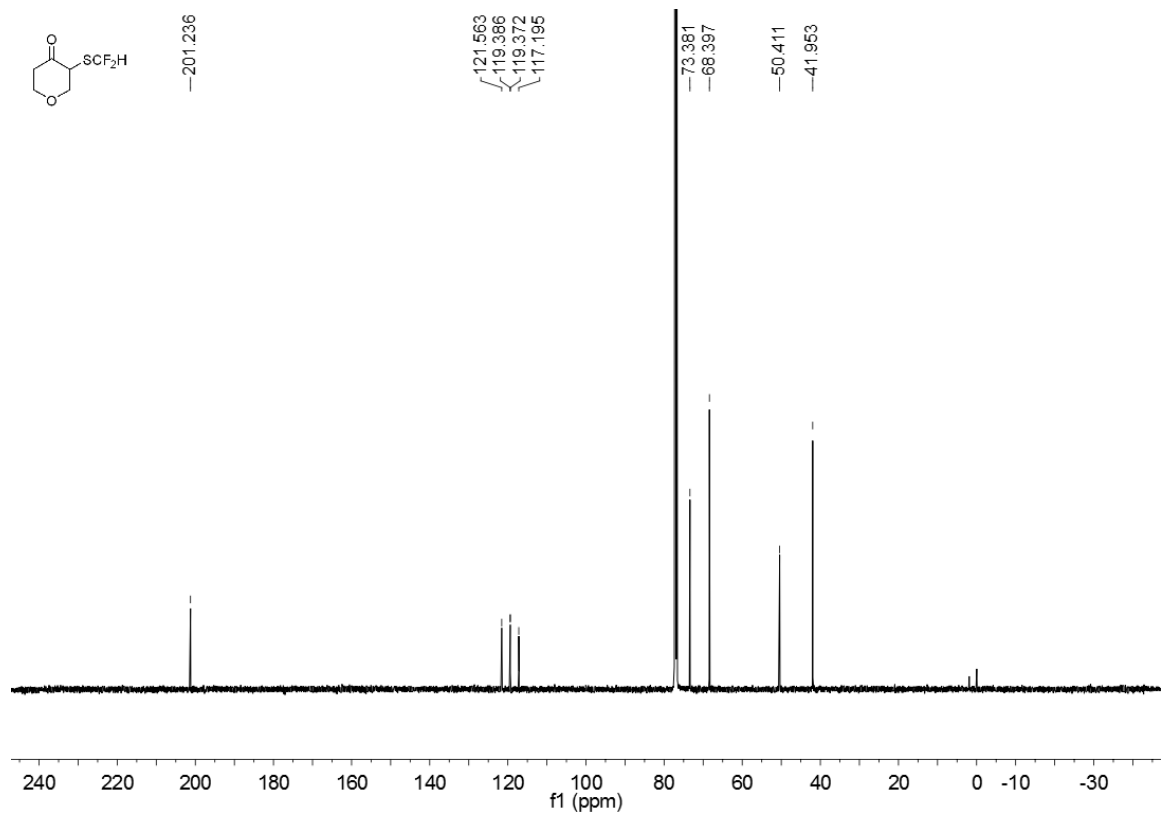

**$^{19}\text{F}$  NMR (376 MHz,  $\text{CDCl}_3$ ) spectrum of  
3-(difluoromethylthio)dihydro-2H-pyran-4(3H)-one 13**

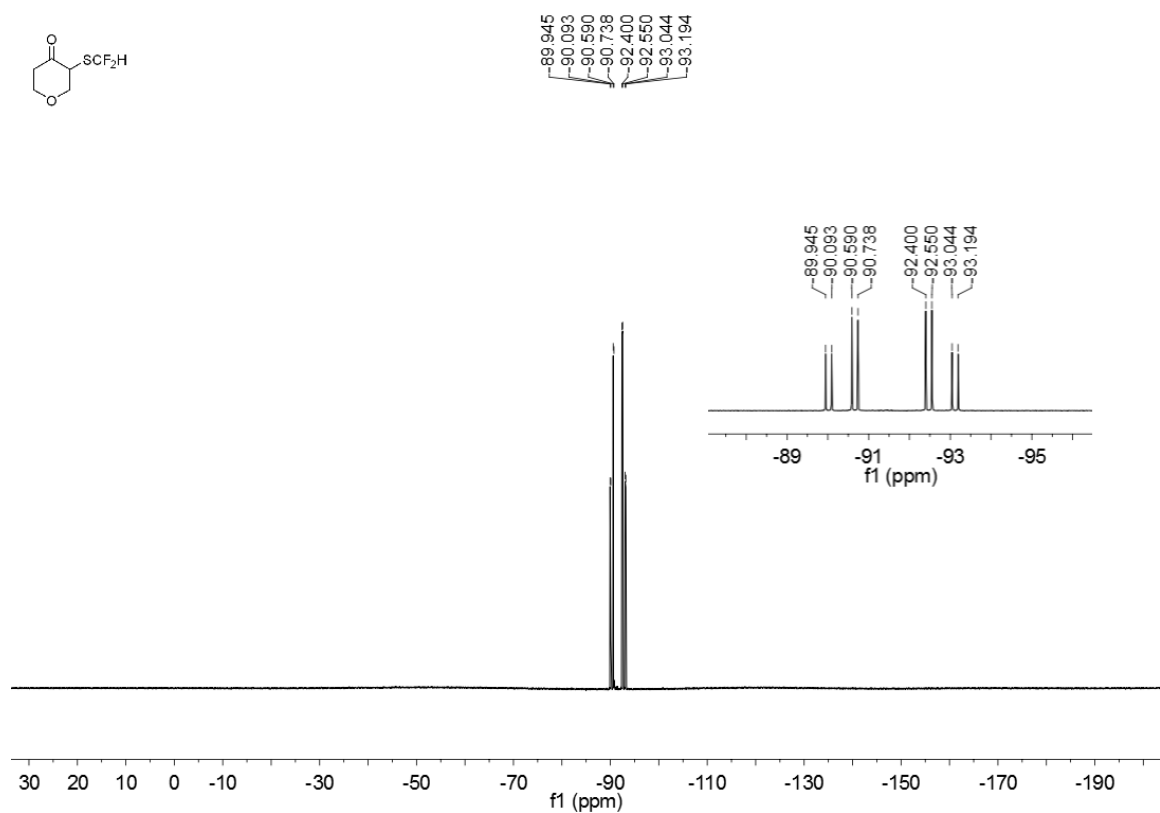

Supplement: d0sc03039b1.pdf [file d0sc03039b1.pdf]
